# Supplementary material
Source: publisher figshare collection journal article supplement (https://acs.figshare.com/ndownloader/files/10904825)
Supplement: Supplementary file 1 [file 10904825]

 
data_eric029_sq 

# start Validation Reply Form
_vrf_THETM01_eric029_sq
;
PROBLEM: The value of sine(theta_max)/wavelength is less than 0.550
RESPONSE: This compound, much like related MOPs, consistently deposit as
weakly diffracting crystals perhaps because of the severe solvent disorder 
within and between the MOP structures. These results represent the best of 
several trials.
;
_vrf_RINTA01_eric029_sq
;
PROBLEM: The value of Rint is greater than 0.18
RESPONSE: See response to THETM01. We have opted to integrate as high 
in 2theta despite the inclusion of more noise in the data in an 
effort to see more detail in the structure.
;
_vrf_PLAT020_eric029_sq
;
PROBLEM: The Value of Rint is Greater Than 0.12 .........      0.191 Report
RESPONSE: See response to RINTA01
;
_vrf_PLAT029_eric029_sq
;
PROBLEM: _diffrn_measured_fraction_theta_full value Low .      0.940 Why?  
RESPONSE: See response to RINTA01 
;
_vrf_PLAT084_eric029_sq
;
PROBLEM: High wR2 Value (i.e. > 0.25) ...................       0.37 Report
RESPONSE: See response to RINTA01
;
_vrf_PLAT341_eric029_sq
;
PROBLEM: Low Bond Precision on  C-C Bonds ...............     0.0219 Ang.  
RESPONSE: The significant disorder in the solvent DMA molecules that 
could not be modeled as separate contributions contribute to the 
lower average C-C bond precision.
;
_vrf_PLAT430_eric029_sq
;
PROBLEM: Short Inter D...A Contact O1_13    ..O_26      .       2.76 Ang.  
RESPONSE: The oxygen atoms coordinated to the metal 
atoms are presumably O-atom terminals of solvent molecules which couldn't
be modeled. The unassignable atoms on the presumed solvent molecules 
and propoxide moieties were treated as diffused contributions. 
The H-atom positions on the terminally assigned C-atoms on incomplete 
propoxide groups cannot be calculated and were ignored. Please note that the 
formula reflects only the atoms which could be located and assigned.
;
_vrf_PLAT911_eric029_sq
;
PROBLEM: Missing FCF Refl Between Thmin & STh/L=    0.548       2154 Report
RESPONSE: See response to RINTA01
;
# end Validation Reply Form
  
_audit_creation_method            'SHELXL-2017/1' 
_shelx_SHELXL_version_number      '2017/1' 
_chemical_name_systematic         ? 
_chemical_name_common             ? 
_chemical_melting_point           ? 
_chemical_formula_moiety          ? 
_chemical_formula_sum 
 'C320 H350 Cu24 N18 O150' 
_chemical_formula_weight          8373.12 
  
loop_ 
 _atom_type_symbol 
 _atom_type_description 
 _atom_type_scat_dispersion_real 
 _atom_type_scat_dispersion_imag 
 _atom_type_scat_source 
 'C'  'C'   0.0181   0.0091 
 'International Tables Vol C Tables 4.2.6.8 and 6.1.1.4' 
 'H'  'H'   0.0000   0.0000 
 'International Tables Vol C Tables 4.2.6.8 and 6.1.1.4' 
 'Cu'  'Cu'  -1.9646   0.5888 
 'International Tables Vol C Tables 4.2.6.8 and 6.1.1.4' 
 'O'  'O'   0.0492   0.0322 
 'International Tables Vol C Tables 4.2.6.8 and 6.1.1.4' 
 'N'  'N'   0.0311   0.0180 
 'International Tables Vol C Tables 4.2.6.8 and 6.1.1.4' 
  
_space_group_crystal_system       triclinic 
_space_group_IT_number            2 
_space_group_name_H-M_alt         'P -1' 
_space_group_name_Hall            '-P 1' 
  
_shelx_space_group_comment 
; 
The symmetry employed for this shelxl refinement is uniquely defined 
by the following loop, which should always be used as a source of 
symmetry information in preference to the above space-group names. 
They are only intended as comments. 
; 
  
loop_ 
 _space_group_symop_operation_xyz 
 'x, y, z' 
 '-x, -y, -z' 
  
_cell_length_a                    25.4877(8) 
_cell_length_b                    25.7261(8) 
_cell_length_c                    25.8744(8) 
_cell_angle_alpha                 71.2054(18) 
_cell_angle_beta                  61.6771(17) 
_cell_angle_gamma                 61.2609(16) 
_cell_volume                      12997.5(8) 
_cell_formula_units_Z             1 
_cell_measurement_temperature     200(2) 
_cell_measurement_reflns_used     9902 
_cell_measurement_theta_min       2.60 
_cell_measurement_theta_max       45.83 
  
_exptl_crystal_description        needle 
_exptl_crystal_colour             green
_exptl_crystal_density_meas       ? 
_exptl_crystal_density_method     ? 
_exptl_crystal_density_diffrn     1.070 
_exptl_crystal_F_000              4292 
_exptl_transmission_factor_min    ? 
_exptl_transmission_factor_max    ? 
_exptl_crystal_size_max           0.267 
_exptl_crystal_size_mid           0.117 
_exptl_crystal_size_min           0.074
_exptl_absorpt_coefficient_mu     1.608 
_shelx_estimated_absorpt_T_min    ? 
_shelx_estimated_absorpt_T_max    ? 
_exptl_absorpt_correction_type    multi-scan 
_exptl_absorpt_correction_T_min   0.5876  
_exptl_absorpt_correction_T_max   0.7513  
_exptl_absorpt_process_details    'APEX3 (Bruker, 2015)' 
_exptl_absorpt_special_details    ? 
_diffrn_ambient_temperature       200(2) 
_diffrn_radiation_wavelength      1.54178 
_diffrn_radiation_type            CuK\a 
_diffrn_source                    ? 
_diffrn_measurement_device_type   'Bruker AXS APEX diffractometer' 
_diffrn_measurement_method        '\f and \w scans' 
_diffrn_detector_area_resol_mean  8.33 
_diffrn_reflns_number             137380 
_diffrn_reflns_av_unetI/netI      0.1683 
_diffrn_reflns_av_R_equivalents   0.1911 
_diffrn_reflns_limit_h_min        -27 
_diffrn_reflns_limit_h_max        26 
_diffrn_reflns_limit_k_min        -28 
_diffrn_reflns_limit_k_max        28 
_diffrn_reflns_limit_l_min        -27 
_diffrn_reflns_limit_l_max        28 
_diffrn_reflns_theta_min          1.954 
_diffrn_reflns_theta_max          57.619 
_diffrn_reflns_theta_full         57.619 
_diffrn_measured_fraction_theta_max   0.940 
_diffrn_measured_fraction_theta_full  0.940 
_diffrn_reflns_Laue_measured_fraction_max    0.940 
_diffrn_reflns_Laue_measured_fraction_full   0.940 
_diffrn_reflns_point_group_measured_fraction_max   0.940 
_diffrn_reflns_point_group_measured_fraction_full  0.940 
_reflns_number_total              33629 
_reflns_number_gt                 16444 
_reflns_threshold_expression      'I > 2\s(I)' 
_reflns_Friedel_coverage          0.000 
_reflns_Friedel_fraction_max      . 
_reflns_Friedel_fraction_full     . 
  
_reflns_special_details 
; 
 Reflections were merged by SHELXL according to the crystal 
 class for the calculation of statistics and refinement. 
  
 Structure factors included contributions from the .fab file. 
  
 _reflns_Friedel_fraction is defined as the number of unique 
 Friedel pairs measured divided by the number that would be 
 possible theoretically, ignoring centric projections and 
 systematic absences. 
; 
  
_computing_data_collection        'Bruker APEX2' 
_computing_cell_refinement        'Bruker SAINT' 
_computing_data_reduction         'Bruker SAINT' 
_computing_structure_solution     'SHELXS-97 (Sheldrick 2008)' 
_computing_structure_refinement 'SHELXL-2017/1 (Sheldrick, 2017)' 
_computing_molecular_graphics     'Bruker SHELXTL' 
_computing_publication_material   'Bruker SHELXTL' 
_refine_special_details           ? 
_refine_ls_structure_factor_coef  Fsqd 
_refine_ls_matrix_type            full 
_refine_ls_weighting_scheme       calc 
_refine_ls_weighting_details 
'w=1/[\s^2^(Fo^2^)+(0.1947P)^2^] where P=(Fo^2^+2Fc^2^)/3' 
_atom_sites_solution_primary      ? 
_atom_sites_solution_secondary    ? 
_atom_sites_solution_hydrogens    geom 
_refine_ls_hydrogen_treatment     constr 
_refine_ls_extinction_method      none 
_refine_ls_extinction_coef        . 
_refine_ls_number_reflns          33629 
_refine_ls_number_parameters      2258 
_refine_ls_number_restraints      4402 
_refine_ls_R_factor_all           0.1819 
_refine_ls_R_factor_gt            0.1157 
_refine_ls_wR_factor_ref          0.3683 
_refine_ls_wR_factor_gt           0.3115 
_refine_ls_goodness_of_fit_ref    1.037 
_refine_ls_restrained_S_all       1.029 
_refine_ls_shift/su_max           0.003 
_refine_ls_shift/su_mean          0.000 
  
loop_ 
 _atom_site_label 
 _atom_site_type_symbol 
 _atom_site_fract_x 
 _atom_site_fract_y 
 _atom_site_fract_z 
 _atom_site_U_iso_or_equiv 
 _atom_site_adp_type 
 _atom_site_occupancy 
 _atom_site_site_symmetry_order 
 _atom_site_calc_flag 
 _atom_site_refinement_flags_posn 
 _atom_site_refinement_flags_adp 
 _atom_site_refinement_flags_occupancy 
 _atom_site_disorder_assembly 
 _atom_site_disorder_group 
Cu1 Cu 0.55297(10) 0.34927(8) 0.25154(10) 0.0770(5) Uani 1 1 d . U . . . 
Cu2 Cu 0.58286(11) 0.29397(9) 0.16543(10) 0.0849(5) Uani 1 1 d . U . . . 
Cu3 Cu 0.38210(8) 0.69694(7) 0.23122(8) 0.0575(4) Uani 1 1 d . U . . . 
Cu4 Cu 0.34448(8) 0.76131(7) 0.14328(8) 0.0596(4) Uani 1 1 d . U . . . 
Cu5 Cu 0.31412(8) 0.84924(7) 0.48741(8) 0.0570(4) Uani 1 1 d . U . . . 
Cu6 Cu 0.25443(8) 0.96589(7) 0.48841(9) 0.0579(4) Uani 1 1 d . U . . . 
Cu7 Cu 0.11838(8) 0.65458(7) 0.55713(8) 0.0582(4) Uani 1 1 d . U . . . 
Cu8 Cu -0.00592(8) 0.70614(7) 0.57569(8) 0.0575(4) Uani 1 1 d . U . . . 
Cu9 Cu 0.23868(9) 0.44874(9) 0.81594(8) 0.0720(5) Uani 1 1 d . U . . . 
Cu10 Cu 0.15319(9) 0.43931(10) 0.92435(9) 0.0838(6) Uani 1 1 d D U . . . 
Cu11 Cu 0.29764(9) 0.30350(7) 0.57120(10) 0.0710(5) Uani 1 1 d . U . . . 
Cu12 Cu 0.23626(9) 0.23554(8) 0.59089(11) 0.0750(5) Uani 1 1 d . U . . . 
O1_1 O 0.4821(5) 0.3215(4) 0.2905(4) 0.0802(11) Uani 1 1 d . U . . . 
O2_1 O 0.5095(5) 0.2688(4) 0.2210(5) 0.0858(12) Uani 1 1 d . U . . . 
O3_1 O 0.3305(4) 0.2925(4) 0.4878(5) 0.0767(11) Uani 1 1 d . U . . . 
O4_1 O 0.2706(4) 0.2414(4) 0.5052(5) 0.0801(12) Uani 1 1 d . U . . . 
C1_1 C 0.4762(8) 0.2879(6) 0.2690(7) 0.0832(12) Uani 1 1 d . U . . . 
C2_1 C 0.4233(8) 0.2642(6) 0.3121(8) 0.0850(13) Uani 1 1 d . U . . . 
C3_1 C 0.4077(8) 0.2300(6) 0.2940(8) 0.0886(14) Uani 1 1 d . U . . . 
H3_1 H 0.430324 0.220025 0.254714 0.106 Uiso 1 1 calc R U . . . 
C4_1 C 0.3593(8) 0.2108(7) 0.3337(8) 0.0921(14) Uani 1 1 d . U . . . 
C5_1 C 0.3283(8) 0.2199(6) 0.3904(8) 0.0880(15) Uani 1 1 d . U . . . 
H5_1 H 0.297380 0.203141 0.417063 0.106 Uiso 1 1 calc R U . . . 
C6_1 C 0.3431(7) 0.2558(6) 0.4104(8) 0.0842(13) Uani 1 1 d . U . . . 
C7_1 C 0.3903(7) 0.2769(6) 0.3688(7) 0.0836(15) Uani 1 1 d . U . . . 
H7_1 H 0.399967 0.301500 0.380667 0.100 Uiso 1 1 calc R U . . . 
C8_1 C 0.3118(7) 0.2622(6) 0.4731(8) 0.0790(11) Uani 1 1 d . U . . . 
O5_1 O 0.3493(5) 0.1736(5) 0.3117(5) 0.0980(15) Uani 1 1 d . U . . . 
C9_1 C 0.3065(9) 0.1422(7) 0.3556(8) 0.1016(19) Uani 1 1 d . U . . . 
H9A_1 H 0.261248 0.171438 0.371314 0.122 Uiso 1 1 calc R U . . . 
H9B_1 H 0.320688 0.120687 0.388988 0.122 Uiso 1 1 calc R U . . . 
C10_1 C 0.3108(8) 0.0977(7) 0.3242(9) 0.104(2) Uani 1 1 d . U . . . 
H10A_1 H 0.280371 0.078266 0.351752 0.125 Uiso 1 1 calc R U . . . 
H10B_1 H 0.298439 0.119286 0.289797 0.125 Uiso 1 1 calc R U . . . 
C11_1 C 0.3778(9) 0.0519(8) 0.3041(9) 0.115(3) Uani 1 1 d . U . . . 
H11A_1 H 0.378957 0.020648 0.289274 0.173 Uiso 1 1 calc R U . . . 
H11B_1 H 0.391905 0.034227 0.337381 0.173 Uiso 1 1 calc R U . . . 
H11C_1 H 0.406841 0.070477 0.272467 0.173 Uiso 1 1 calc R U . . . 
O1_2 O 0.5040(4) 0.4186(4) 0.2081(4) 0.0771(11) Uani 1 1 d . U . . . 
O2_2 O 0.5235(5) 0.3693(4) 0.1389(4) 0.0814(12) Uani 1 1 d . U . . . 
O3_2 O 0.3933(4) 0.6319(3) 0.1967(4) 0.0618(10) Uani 1 1 d . U . . . 
O4_2 O 0.3678(4) 0.6863(4) 0.1188(4) 0.0639(11) Uani 1 1 d . U . . . 
C1_2 C 0.4987(7) 0.4159(6) 0.1624(7) 0.0771(12) Uani 1 1 d . U . . . 
C2_2 C 0.4594(7) 0.4736(6) 0.1361(6) 0.0737(12) Uani 1 1 d . U . . . 
C3_2 C 0.4467(6) 0.4736(6) 0.0887(6) 0.0733(14) Uani 1 1 d . U . . . 
H3_2 H 0.461333 0.437201 0.074597 0.088 Uiso 1 1 calc R U . . . 
C4_2 C 0.4129(7) 0.5269(6) 0.0632(6) 0.0739(13) Uani 1 1 d . U . . . 
C5_2 C 0.3923(6) 0.5802(6) 0.0825(6) 0.0720(13) Uani 1 1 d . U . . . 
H5_2 H 0.368917 0.616746 0.064316 0.086 Uiso 1 1 calc R U . . . 
C6_2 C 0.4058(6) 0.5808(6) 0.1291(6) 0.0694(12) Uani 1 1 d . U . . . 
C7_2 C 0.4380(6) 0.5269(6) 0.1563(6) 0.0712(14) Uani 1 1 d . U . . . 
H7_2 H 0.445509 0.526461 0.189052 0.085 Uiso 1 1 calc R U . . . 
C8_2 C 0.3880(6) 0.6383(6) 0.1492(6) 0.0649(11) Uani 1 1 d . U . . . 
O5_2 O 0.3964(4) 0.5327(4) 0.0183(4) 0.0773(13) Uani 1 1 d D U . . . 
C9_2 C 0.4121(7) 0.4790(6) -0.0017(7) 0.0800(16) Uani 1 1 d D U . . . 
H9A_2 H 0.394882 0.452016 0.032223 0.096 Uiso 1 1 calc R U . . . 
H9B_2 H 0.459750 0.457910 -0.020207 0.096 Uiso 1 1 calc R U . . . 
C10_2 C 0.3829(7) 0.4954(6) -0.0454(7) 0.0816(18) Uani 1 1 d D U . . . 
H10A_2 H 0.401458 0.521101 -0.079962 0.098 Uiso 1 1 calc R U . . . 
H10B_2 H 0.335506 0.518030 -0.027305 0.098 Uiso 1 1 calc R U . . . 
C11_2 C 0.3967(7) 0.4383(6) -0.0655(7) 0.086(2) Uani 1 1 d D U . . . 
H11A_2 H 0.385341 0.449020 -0.099880 0.129 Uiso 1 1 calc R U . . . 
H11B_2 H 0.370744 0.417150 -0.033185 0.129 Uiso 1 1 calc R U . . . 
H11C_2 H 0.442855 0.412293 -0.076263 0.129 Uiso 1 1 calc R U . . . 
O1_3 O 0.6261(5) 0.3701(4) 0.2030(5) 0.0848(12) Uani 1 1 d . U . . . 
O2_3 O 0.6492(5) 0.3284(4) 0.1255(5) 0.0917(12) Uani 1 1 d . U . . . 
O3_3 O 0.7530(5) 0.4895(5) 0.1630(5) 0.0983(19) Uani 1 1 d . U . . . 
O4_3 O 0.8281(6) 0.4955(5) 0.0714(5) 0.1000(19) Uani 1 1 d . U . . . 
C1_3 C 0.6593(8) 0.3586(7) 0.1507(8) 0.0922(13) Uani 1 1 d . U . . . 
C2_3 C 0.7139(5) 0.3780(5) 0.1135(5) 0.1014(15) Uani 1 1 d G U . . . 
C3_3 C 0.7504(6) 0.3610(5) 0.0569(5) 0.1098(19) Uani 1 1 d G U . . . 
H3_3 H 0.742155 0.335395 0.044860 0.132 Uiso 1 1 calc R U . . . 
C4_3 C 0.7990(6) 0.3815(5) 0.0178(4) 0.1176(18) Uani 1 1 d G U . . . 
C5_3 C 0.8111(5) 0.4191(5) 0.0353(5) 0.1132(19) Uani 1 1 d G U . . . 
H5_3 H 0.844290 0.433081 0.008599 0.136 Uiso 1 1 calc R U . . . 
C6_3 C 0.7745(6) 0.4361(5) 0.0919(5) 0.1044(16) Uani 1 1 d G U . . . 
C7_3 C 0.7259(5) 0.4155(5) 0.1310(4) 0.1018(17) Uani 1 1 d G U . . . 
H7_3 H 0.700951 0.427155 0.169739 0.122 Uiso 1 1 calc R U . . . 
C8_3 C 0.7849(9) 0.4759(8) 0.1116(9) 0.1014(17) Uani 1 1 d . U . . . 
O5_3 O 0.8314(7) 0.3721(6) -0.0409(6) 0.131(2) Uani 1 1 d D U . . . 
C9_3 C 0.8086(10) 0.3516(10) -0.0700(8) 0.136(2) Uani 1 1 d D U . . . 
H9A_3 H 0.761453 0.375239 -0.058929 0.163 Uiso 1 1 calc R U . . . 
H9B_3 H 0.814831 0.309470 -0.053944 0.163 Uiso 1 1 calc R U . . . 
C10_3 C 0.8397(10) 0.3553(10) -0.1352(8) 0.142(3) Uani 1 1 d D U . . . 
H10A_3 H 0.878145 0.317636 -0.146135 0.171 Uiso 1 1 calc R U . . . 
H10B_3 H 0.855203 0.388080 -0.150470 0.171 Uiso 1 1 calc R U . . . 
C11_3 C 0.7949(10) 0.3663(10) -0.1664(9) 0.148(4) Uani 1 1 d D U . . . 
H11A_3 H 0.818177 0.371165 -0.209380 0.222 Uiso 1 1 calc R U . . . 
H11B_3 H 0.755694 0.402565 -0.154505 0.222 Uiso 1 1 calc R U . . . 
H11C_3 H 0.782905 0.332116 -0.154809 0.222 Uiso 1 1 calc R U . . . 
O1_4 O 0.3631(4) 0.7735(3) 0.2498(4) 0.0613(11) Uani 1 1 d . U . . . 
O2_4 O 0.3238(4) 0.8301(3) 0.1786(4) 0.0629(10) Uani 1 1 d . U . . . 
O3_4 O 0.3222(4) 0.8687(3) 0.4056(4) 0.0624(11) Uani 1 1 d . U . . . 
O4_4 O 0.2708(4) 0.9681(3) 0.4051(4) 0.0615(10) Uani 1 1 d . U . . . 
C1_4 C 0.3354(6) 0.8218(5) 0.2231(6) 0.0636(11) Uani 1 1 d . U . . . 
C2_4 C 0.3137(6) 0.8805(6) 0.2458(6) 0.0675(12) Uani 1 1 d . U . . . 
C3_4 C 0.2874(6) 0.9347(6) 0.2175(7) 0.0722(15) Uani 1 1 d . U . . . 
H3_4 H 0.284349 0.937991 0.181258 0.087 Uiso 1 1 calc R U . . . 
C4_4 C 0.2647(7) 0.9857(6) 0.2432(7) 0.0773(14) Uani 1 1 d . U . . . 
C5_4 C 0.2711(6) 0.9822(6) 0.2935(7) 0.0729(14) Uani 1 1 d . U . . . 
H5_4 H 0.258376 1.017415 0.308657 0.088 Uiso 1 1 calc R U . . . 
C6_4 C 0.2966(6) 0.9264(5) 0.3222(6) 0.0671(12) Uani 1 1 d . U . . . 
C7_4 C 0.3187(6) 0.8759(6) 0.2993(6) 0.0659(13) Uani 1 1 d . U . . . 
H7_4 H 0.337320 0.837878 0.318918 0.079 Uiso 1 1 calc R U . . . 
C8_4 C 0.2964(6) 0.9215(5) 0.3825(6) 0.0623(11) Uani 1 1 d . U . . . 
O5_4 O 0.2375(5) 1.0409(4) 0.2127(5) 0.0884(17) Uani 1 1 d . U . . . 
C9_4 C 0.1961(8) 1.0952(7) 0.2473(8) 0.102(3) Uani 1 1 d . U . . . 
O1_5 O 0.2921(4) 0.7083(3) 0.2770(4) 0.0616(11) Uani 1 1 d . U . . . 
O2_5 O 0.2608(4) 0.7564(3) 0.2021(4) 0.0608(11) Uani 1 1 d . U . . . 
O3_5 O 0.1350(4) 0.6786(3) 0.4732(4) 0.0606(10) Uani 1 1 d . U . . . 
O4_5 O 0.0302(4) 0.7189(3) 0.4881(4) 0.0605(11) Uani 1 1 d . U . . . 
C1_5 C 0.2510(6) 0.7327(5) 0.2543(6) 0.0609(11) Uani 1 1 d . U . . . 
C2_5 C 0.1846(6) 0.7342(5) 0.2939(6) 0.0623(12) Uani 1 1 d . U . . . 
C3_5 C 0.1390(6) 0.7489(6) 0.2700(6) 0.0666(14) Uani 1 1 d . U . . . 
H3_5 H 0.149431 0.759476 0.228658 0.080 Uiso 1 1 calc R U . . . 
C4_5 C 0.0794(6) 0.7475(6) 0.3074(6) 0.0699(13) Uani 1 1 d . U . . . 
C5_5 C 0.0608(6) 0.7367(6) 0.3670(6) 0.0658(14) Uani 1 1 d . U . . . 
H5_5 H 0.017615 0.740552 0.392169 0.079 Uiso 1 1 calc R U . . . 
C6_5 C 0.1074(6) 0.7197(5) 0.3906(6) 0.0615(12) Uani 1 1 d . U . . . 
C7_5 C 0.1677(6) 0.7186(5) 0.3539(6) 0.0605(14) Uani 1 1 d . U . . . 
H7_5 H 0.198797 0.706893 0.370169 0.073 Uiso 1 1 calc R U . . . 
C8_5 C 0.0888(6) 0.7046(5) 0.4561(6) 0.0604(12) Uani 1 1 d . U . . . 
O5_5 O 0.0394(4) 0.7622(4) 0.2784(4) 0.0786(14) Uani 1 1 d . U . . . 
C9_5 C -0.0231(6) 0.7582(7) 0.3147(7) 0.0826(18) Uani 1 1 d . U . . . 
H9A_5 H -0.052003 0.790994 0.339894 0.099 Uiso 1 1 calc R U . . . 
H9B_5 H -0.017821 0.719595 0.340598 0.099 Uiso 1 1 calc R U . . . 
C10_5 C -0.0512(7) 0.7631(8) 0.2719(7) 0.093(3) Uani 1 1 d . U . . . 
O1_6 O 0.4688(4) 0.6924(4) 0.1763(4) 0.0645(12) Uani 1 1 d . U . . . 
O2_6 O 0.4370(4) 0.7506(4) 0.1033(4) 0.0659(11) Uani 1 1 d . U . . . 
O3_6 O 0.6965(4) 0.6112(4) 0.1501(4) 0.0771(17) Uani 1 1 d . U . . . 
O4_6 O 0.7709(4) 0.6189(4) 0.0572(4) 0.0795(18) Uani 1 1 d . U . . . 
C1_6 C 0.4795(6) 0.7192(6) 0.1255(6) 0.0671(13) Uani 1 1 d . U . . . 
C2_6 C 0.5495(6) 0.7119(6) 0.0857(6) 0.0744(14) Uani 1 1 d . U . . . 
C3_6 C 0.5636(7) 0.7408(7) 0.0280(6) 0.0833(18) Uani 1 1 d . U . . . 
H3_6 H 0.529843 0.767111 0.014257 0.100 Uiso 1 1 calc R U . . . 
C4_6 C 0.6266(7) 0.7306(8) -0.0082(7) 0.0934(17) Uani 1 1 d . U . . . 
C5_6 C 0.6759(7) 0.6954(7) 0.0142(7) 0.0880(18) Uani 1 1 d . U . . . 
H5_6 H 0.719890 0.688545 -0.010780 0.106 Uiso 1 1 calc R U . . . 
C6_6 C 0.6595(6) 0.6708(7) 0.0729(6) 0.0800(16) Uani 1 1 d . U . . . 
C7_6 C 0.5954(6) 0.6778(6) 0.1100(6) 0.0754(16) Uani 1 1 d . U . . . 
H7_6 H 0.584256 0.659966 0.150001 0.091 Uiso 1 1 calc R U . . . 
C8_6 C 0.7130(6) 0.6311(7) 0.0964(6) 0.0785(16) Uani 1 1 d . U . . . 
O5_6 O 0.6395(5) 0.7551(5) -0.0650(5) 0.109(2) Uani 1 1 d . U . . . 
C9_6 C 0.7088(8) 0.7399(9) -0.1085(7) 0.120(3) Uani 1 1 d . U . . . 
H9A_6 H 0.732200 0.752410 -0.096525 0.143 Uiso 1 1 calc R U . . . 
H9B_6 H 0.731572 0.696411 -0.111008 0.143 Uiso 1 1 calc R U . . . 
C10_6 C 0.7046(8) 0.7736(9) -0.1663(8) 0.126(3) Uani 1 1 d . U . . . 
H10A_6 H 0.684376 0.817237 -0.164694 0.152 Uiso 1 1 calc R U . . . 
H10B_6 H 0.678977 0.762943 -0.177252 0.152 Uiso 1 1 calc R U . . . 
C11_6 C 0.7788(9) 0.7536(10) -0.2129(9) 0.144(5) Uani 1 1 d . U . . . 
H11A_6 H 0.805109 0.756956 -0.197181 0.216 Uiso 1 1 calc R U . . . 
H11B_6 H 0.781071 0.779441 -0.250510 0.216 Uiso 1 1 calc R U . . . 
H11C_6 H 0.795377 0.712037 -0.219301 0.216 Uiso 1 1 calc R U . . . 
O1_7 O 0.3920(4) 0.8634(3) 0.4636(4) 0.0620(10) Uani 1 1 d . U . . . 
O2_7 O 0.3408(4) 0.9631(3) 0.4642(4) 0.0627(10) Uani 1 1 d . U . . . 
O3_7 O 0.6262(4) 0.7680(4) 0.4234(5) 0.0753(15) Uani 1 1 d . U . . . 
O4_7 O 0.6773(4) 0.8262(4) 0.4098(5) 0.0759(15) Uani 1 1 d . U . . . 
C1_7 C 0.3907(6) 0.9136(5) 0.4571(6) 0.0639(11) Uani 1 1 d . U . . . 
C2_7 C 0.4538(6) 0.9186(5) 0.4416(7) 0.0692(12) Uani 1 1 d . U . . . 
C3_7 C 0.4555(6) 0.9744(6) 0.4327(7) 0.0747(14) Uani 1 1 d . U . . . 
H3_7 H 0.416961 1.009401 0.436348 0.090 Uiso 1 1 calc R U . . . 
C4_7 C 0.5126(7) 0.9791(6) 0.4187(8) 0.0806(14) Uani 1 1 d . U . . . 
C5_7 C 0.5696(7) 0.9277(6) 0.4134(7) 0.0779(15) Uani 1 1 d . U . . . 
H5_7 H 0.608787 0.930584 0.404806 0.093 Uiso 1 1 calc R U . . . 
C6_7 C 0.5682(6) 0.8708(5) 0.4210(7) 0.0745(13) Uani 1 1 d . U . . . 
C7_7 C 0.5089(6) 0.8683(5) 0.4355(7) 0.0710(14) Uani 1 1 d . U . . . 
H7_7 H 0.507244 0.830690 0.441291 0.085 Uiso 1 1 calc R U . . . 
C8_7 C 0.6273(6) 0.8172(6) 0.4194(7) 0.0752(13) Uani 1 1 d . U . . . 
O5_7 O 0.5248(5) 1.0282(4) 0.4097(5) 0.0894(15) Uani 1 1 d . U . . . 
C9_7 C 0.4704(7) 1.0802(6) 0.4234(8) 0.0937(19) Uani 1 1 d . U . . . 
H9A_7 H 0.439862 1.075335 0.464710 0.112 Uiso 1 1 calc R U . . . 
H9B_7 H 0.447847 1.092361 0.396467 0.112 Uiso 1 1 calc R U . . . 
C10_7 C 0.4966(8) 1.1256(6) 0.4153(8) 0.095(2) Uani 1 1 d . U . . . 
H10A_7 H 0.458589 1.163342 0.427130 0.114 Uiso 1 1 calc R U . . . 
H10B_7 H 0.516694 1.111626 0.444568 0.114 Uiso 1 1 calc R U . . . 
C11_7 C 0.5401(8) 1.1402(7) 0.3625(9) 0.108(3) Uani 1 1 d . U . . . 
H11A_7 H 0.517040 1.169361 0.337162 0.162 Uiso 1 1 calc R U . . . 
H11B_7 H 0.571672 1.104224 0.342906 0.162 Uiso 1 1 calc R U . . . 
H11C_7 H 0.562674 1.157552 0.369441 0.162 Uiso 1 1 calc R U . . . 
O1_8 O 0.3003(4) 0.8431(3) 0.5689(4) 0.0656(11) Uani 1 1 d . U . . . 
O2_8 O 0.2461(4) 0.9429(3) 0.5711(4) 0.0649(11) Uani 1 1 d . U . . . 
O3_8 O 0.3899(5) 0.7295(4) 0.7233(4) 0.0832(17) Uani 1 1 d . U . . . 
O4_8 O 0.3589(5) 0.7741(4) 0.7994(5) 0.0847(16) Uani 1 1 d . U . . . 
C1_8 C 0.2699(6) 0.8901(5) 0.5946(6) 0.0668(12) Uani 1 1 d . U . . . 
C2_8 C 0.2668(6) 0.8836(6) 0.6549(7) 0.0730(13) Uani 1 1 d . U . . . 
C3_8 C 0.2241(7) 0.9294(6) 0.6897(7) 0.0798(16) Uani 1 1 d . U . . . 
H3_8 H 0.194992 0.964480 0.675504 0.096 Uiso 1 1 calc R U . . . 
C4_8 C 0.2229(7) 0.9254(6) 0.7449(7) 0.0855(15) Uani 1 1 d . U . . . 
C5_8 C 0.2676(7) 0.8737(6) 0.7643(7) 0.0823(16) Uani 1 1 d . U . . . 
H5_8 H 0.268468 0.870954 0.801374 0.099 Uiso 1 1 calc R U . . . 
C6_8 C 0.3093(7) 0.8279(6) 0.7314(7) 0.0792(14) Uani 1 1 d . U . . . 
C7_8 C 0.3093(7) 0.8318(6) 0.6767(7) 0.0746(15) Uani 1 1 d . U . . . 
H7_8 H 0.338088 0.799357 0.653836 0.090 Uiso 1 1 calc R U . . . 
C8_8 C 0.3565(7) 0.7727(6) 0.7523(7) 0.0825(15) Uani 1 1 d . U . . . 
O5_8 O 0.1778(5) 0.9721(4) 0.7762(5) 0.0948(17) Uani 1 1 d . U . . . 
C9_8 C 0.1836(8) 0.9741(7) 0.8279(8) 0.102(2) Uani 1 1 d . U . . . 
H9A_8 H 0.227234 0.971478 0.818133 0.122 Uiso 1 1 calc R U . . . 
H9B_8 H 0.176127 0.940569 0.858539 0.122 Uiso 1 1 calc R U . . . 
C10_8 C 0.1307(9) 1.0350(8) 0.8501(8) 0.111(2) Uani 1 1 d . U . . . 
H10A_8 H 0.086800 1.034653 0.868376 0.134 Uiso 1 1 calc R U . . . 
H10B_8 H 0.132306 1.068156 0.817483 0.134 Uiso 1 1 calc R U . . . 
C11_8 C 0.1497(9) 1.0405(8) 0.8975(9) 0.122(3) Uani 1 1 d . U . . . 
H11A_8 H 0.187775 1.004848 0.900625 0.183 Uiso 1 1 calc R U . . . 
H11B_8 H 0.113337 1.043986 0.936049 0.183 Uiso 1 1 calc R U . . . 
H11C_8 H 0.159631 1.075991 0.885332 0.183 Uiso 1 1 calc R U . . . 
O1_9 O 0.2240(4) 0.8578(3) 0.5128(4) 0.0617(11) Uani 1 1 d . U . . . 
O2_9 O 0.1740(4) 0.9558(3) 0.5137(4) 0.0609(10) Uani 1 1 d . U . . . 
O3_9 O 0.1062(4) 0.7348(3) 0.5623(4) 0.0609(10) Uani 1 1 d . U . . . 
O4_9 O 0.0007(4) 0.7786(3) 0.5772(4) 0.0590(10) Uani 1 1 d . U . . . 
C1_9 C 0.1756(6) 0.9040(5) 0.5204(6) 0.0611(11) Uani 1 1 d . U . . . 
C2_9 C 0.1115(6) 0.8991(5) 0.5423(6) 0.0613(12) Uani 1 1 d . U . . . 
C3_9 C 0.0528(6) 0.9500(5) 0.5580(6) 0.0628(14) Uani 1 1 d . U . . . 
H3_9 H 0.052864 0.988254 0.553064 0.075 Uiso 1 1 calc R U . . . 
C4_9 C -0.0058(6) 0.9423(5) 0.5812(6) 0.0654(13) Uani 1 1 d . U . . . 
C5_9 C -0.0042(6) 0.8857(5) 0.5861(6) 0.0629(13) Uani 1 1 d . U . . . 
H5_9 H -0.043903 0.880693 0.602106 0.076 Uiso 1 1 calc R U . . . 
C6_9 C 0.0524(6) 0.8381(5) 0.5684(6) 0.0603(12) Uani 1 1 d . U . . . 
C7_9 C 0.1111(6) 0.8436(5) 0.5461(6) 0.0612(13) Uani 1 1 d . U . . . 
H7_9 H 0.150771 0.810048 0.533542 0.073 Uiso 1 1 calc R U . . . 
C8_9 C 0.0553(5) 0.7782(5) 0.5689(6) 0.0599(11) Uani 1 1 d . U . . . 
O5_9 O -0.0666(4) 0.9870(4) 0.5984(4) 0.0707(13) Uani 1 1 d . U . . . 
C9_9 C -0.0709(6) 1.0464(5) 0.5947(7) 0.0730(16) Uani 1 1 d . U . . . 
H9A_9 H -0.050463 1.061937 0.553107 0.088 Uiso 1 1 calc R U . . . 
H9B_9 H -0.049194 1.045883 0.618128 0.088 Uiso 1 1 calc R U . . . 
C10_9 C -0.1432(6) 1.0844(6) 0.6200(7) 0.0742(19) Uani 1 1 d . U . . . 
H10A_9 H -0.163161 1.068207 0.661380 0.089 Uiso 1 1 calc R U . . . 
H10B_9 H -0.164472 1.084042 0.596586 0.089 Uiso 1 1 calc R U . . . 
C11_9 C -0.1525(6) 1.1495(6) 0.6175(7) 0.081(3) Uani 1 1 d . U . . . 
H11A_9 H -0.144573 1.169290 0.576795 0.121 Uiso 1 1 calc R U . . . 
H11B_9 H -0.121789 1.148594 0.630730 0.121 Uiso 1 1 calc R U . . . 
H11C_9 H -0.196881 1.171601 0.643408 0.121 Uiso 1 1 calc R U . . . 
O1_10 O 0.1077(4) 0.5849(3) 0.5539(4) 0.0645(10) Uani 1 1 d . U . . . 
O2_10 O 0.0013(4) 0.6282(3) 0.5716(4) 0.0653(11) Uani 1 1 d . U . . . 
O3_10 O 0.2189(4) 0.3678(4) 0.5648(5) 0.0752(11) Uani 1 1 d . U . . . 
O4_10 O 0.1625(4) 0.3131(4) 0.5872(5) 0.0767(11) Uani 1 1 d . U . . . 
C1_10 C 0.0561(6) 0.5835(5) 0.5622(6) 0.0685(12) Uani 1 1 d . U . . . 
C2_10 C 0.0560(6) 0.5230(6) 0.5663(7) 0.0744(13) Uani 1 1 d . U . . . 
C3_10 C 0.0012(7) 0.5192(6) 0.5718(7) 0.0795(14) Uani 1 1 d . U . . . 
H3_10 H -0.036427 0.554275 0.571810 0.095 Uiso 1 1 calc R U . . . 
C4_10 C 0.0019(7) 0.4643(6) 0.5770(8) 0.0850(14) Uani 1 1 d . U . . . 
C5_10 C 0.0561(6) 0.4130(6) 0.5785(7) 0.0794(15) Uani 1 1 d . U . . . 
H5_10 H 0.055582 0.374874 0.583855 0.095 Uiso 1 1 calc R U . . . 
C6_10 C 0.1096(7) 0.4172(6) 0.5724(7) 0.0769(13) Uani 1 1 d . U . . . 
C7_10 C 0.1096(6) 0.4730(5) 0.5656(7) 0.0760(15) Uani 1 1 d . U . . . 
H7_10 H 0.147613 0.475937 0.560331 0.091 Uiso 1 1 calc R U . . . 
C8_10 C 0.1695(7) 0.3622(5) 0.5750(7) 0.0758(12) Uani 1 1 d . U . . . 
O5_10 O -0.0520(5) 0.4603(4) 0.5822(5) 0.0937(17) Uani 1 1 d . U . . . 
C9_10 C -0.0654(8) 0.4166(7) 0.5997(9) 0.108(3) Uani 1 1 d . U . . . 
O1_11 O 0.0880(4) 0.6375(4) 0.6419(4) 0.0670(12) Uani 1 1 d . U . . . 
O2_11 O -0.0181(4) 0.6800(4) 0.6599(4) 0.0711(12) Uani 1 1 d . U . . . 
O3_11 O 0.1624(4) 0.5087(4) 0.7992(4) 0.0781(13) Uani 1 1 d . U . . . 
O4_11 O 0.0890(4) 0.4979(5) 0.8914(4) 0.0867(14) Uani 1 1 d . U . . . 
C1_11 C 0.0314(6) 0.6506(6) 0.6739(6) 0.0723(11) Uani 1 1 d . U . . . 
C2A_11 C 0.0192(8) 0.6415(8) 0.7408(6) 0.0750(9) Uani 0.505(6) 1 d G U P A 1 
C3A_11 C -0.0408(7) 0.6716(7) 0.7824(7) 0.0757(11) Uani 0.505(6) 1 d G U P A 1 
H3A_11 H -0.073770 0.703059 0.769806 0.091 Uiso 0.505(6) 1 calc R U P A 1 
C4A_11 C -0.0526(6) 0.6557(8) 0.8423(7) 0.0769(12) Uani 0.505(6) 1 d G U P A 1 
C5A_11 C -0.0043(8) 0.6096(8) 0.8607(6) 0.0767(11) Uani 0.505(6) 1 d G U P A 1 
H5A_11 H -0.012355 0.598742 0.901701 0.092 Uiso 0.505(6) 1 calc R U P A 1 
C6A_11 C 0.0556(7) 0.5795(7) 0.8191(7) 0.0770(10) Uani 0.505(6) 1 d G U P A 1 
C7A_11 C 0.0674(6) 0.5954(8) 0.7592(7) 0.0757(10) Uani 0.505(6) 1 d G U P A 1 
H7A_11 H 0.108374 0.574805 0.730775 0.091 Uiso 0.505(6) 1 calc R U P A 1 
C2B_11 C 0.0118(8) 0.6140(8) 0.7375(6) 0.0750(9) Uani 0.495(6) 1 d G U P A 2 
C3B_11 C -0.0509(7) 0.6175(8) 0.7733(7) 0.0757(11) Uani 0.495(6) 1 d G U P A 2 
H3B_11 H -0.084767 0.640991 0.758986 0.091 Uiso 0.495(6) 1 calc R U P A 2 
C4B_11 C -0.0642(6) 0.5866(8) 0.8299(7) 0.0769(12) Uani 0.495(6) 1 d G U P A 2 
C5B_11 C -0.0147(8) 0.5522(8) 0.8508(6) 0.0767(11) Uani 0.495(6) 1 d G U P A 2 
H5B_11 H -0.023719 0.531108 0.889534 0.092 Uiso 0.495(6) 1 calc R U P A 2 
C6B_11 C 0.0480(7) 0.5488(8) 0.8151(8) 0.0770(10) Uani 0.495(6) 1 d G U P A 2 
C7B_11 C 0.0613(6) 0.5797(9) 0.7584(7) 0.0757(10) Uani 0.495(6) 1 d G U P A 2 
H7B_11 H 0.104136 0.577317 0.734000 0.091 Uiso 0.495(6) 1 calc R U P A 2 
C8_11 C 0.1071(7) 0.5167(7) 0.8365(7) 0.0810(12) Uani 1 1 d . U . . . 
O5A_11 O -0.1112(8) 0.6870(8) 0.8794(8) 0.0795(15) Uani 0.505(6) 1 d D U P A 1 
C9A_11 C -0.1184(10) 0.6920(12) 0.9349(10) 0.0793(17) Uani 0.505(6) 1 d D U P A 1 
H9A1_11 H -0.145688 0.671091 0.966624 0.095 Uiso 0.505(6) 1 calc R U P A 1 
H9A2_11 H -0.139475 0.734565 0.941272 0.095 Uiso 0.505(6) 1 calc R U P A 1 
C10A_11 C -0.0525(11) 0.6645(11) 0.9362(11) 0.081(2) Uani 0.505(6) 1 d D U P A 1 
H10A_11 H -0.047361 0.690573 0.952913 0.098 Uiso 0.505(6) 1 calc R U P A 1 
H10B_11 H -0.018970 0.658835 0.895605 0.098 Uiso 0.505(6) 1 calc R U P A 1 
C11A_11 C -0.0453(13) 0.6047(10) 0.9744(12) 0.083(3) Uani 0.505(6) 1 d D U P A 1 
H11A_11 H -0.002283 0.585309 0.976149 0.125 Uiso 0.505(6) 1 calc R U P A 1 
H11B_11 H -0.078650 0.610904 1.014393 0.125 Uiso 0.505(6) 1 calc R U P A 1 
H11C_11 H -0.050379 0.579299 0.957327 0.125 Uiso 0.505(6) 1 calc R U P A 1 
O5B_11 O -0.1287(8) 0.5939(8) 0.8622(8) 0.0795(15) Uani 0.495(6) 1 d D U P A 2 
C9B_11 C -0.1434(10) 0.5537(10) 0.9144(10) 0.0793(17) Uani 0.495(6) 1 d D U P A 2 
H9B1_11 H -0.178833 0.545253 0.917326 0.095 Uiso 0.495(6) 1 calc R U P A 2 
H9B2_11 H -0.160086 0.573976 0.948982 0.095 Uiso 0.495(6) 1 calc R U P A 2 
C10B_11 C -0.0896(12) 0.4965(10) 0.9185(11) 0.081(2) Uani 0.495(6) 1 d D U P A 2 
H10C_11 H -0.053171 0.491621 0.879409 0.098 Uiso 0.495(6) 1 calc R U P A 2 
H10D_11 H -0.103837 0.463542 0.928830 0.098 Uiso 0.495(6) 1 calc R U P A 2 
C11B_11 C -0.0658(13) 0.4918(13) 0.9644(12) 0.083(3) Uani 0.495(6) 1 d D U P A 2 
H11D_11 H -0.029969 0.452950 0.965344 0.125 Uiso 0.495(6) 1 calc R U P A 2 
H11E_11 H -0.050643 0.523756 0.953971 0.125 Uiso 0.495(6) 1 calc R U P A 2 
H11F_11 H -0.101324 0.495669 1.003407 0.125 Uiso 0.495(6) 1 calc R U P A 2 
O1_12 O 0.2520(4) 0.2974(4) 0.6584(5) 0.0783(12) Uani 1 1 d . U . . . 
O2_12 O 0.2049(4) 0.2350(4) 0.6754(5) 0.0821(11) Uani 1 1 d . U . . . 
O3_12 O 0.2197(4) 0.3853(4) 0.8111(4) 0.0788(12) Uani 1 1 d . U . . . 
O4_12 O 0.1479(4) 0.3749(5) 0.9039(4) 0.0861(13) Uani 1 1 d . U . . . 
C1_12 C 0.2179(7) 0.2675(6) 0.6931(8) 0.0822(12) Uani 1 1 d . U . . . 
C2_12 C 0.1897(5) 0.2724(4) 0.7573(4) 0.0883(14) Uani 1 1 d G U . . . 
C3_12 C 0.1987(4) 0.3120(4) 0.7752(4) 0.0869(15) Uani 1 1 d G U . . . 
H3_12 H 0.225177 0.332808 0.747028 0.104 Uiso 1 1 calc R U . . . 
C4_12 C 0.1690(5) 0.3211(4) 0.8344(5) 0.0891(14) Uani 1 1 d G U . . . 
C5_12 C 0.1303(5) 0.2906(5) 0.8756(4) 0.0959(17) Uani 1 1 d G U . . . 
H5_12 H 0.109990 0.296854 0.916079 0.115 Uiso 1 1 calc R U . . . 
C6_12 C 0.1213(5) 0.2511(5) 0.8577(4) 0.0998(17) Uani 1 1 d G U . . . 
C7_12 C 0.1510(5) 0.2420(4) 0.7986(5) 0.0947(18) Uani 1 1 d G U . . . 
H7_12 H 0.144834 0.214958 0.786332 0.114 Uiso 1 1 calc R U . . . 
C8_12 C 0.1804(7) 0.3652(7) 0.8520(7) 0.0842(13) Uani 1 1 d . U . . . 
O5_12 O 0.0827(6) 0.2209(6) 0.8982(6) 0.123(3) Uani 1 1 d . U . . . 
O1_13 O 0.2201(4) 0.6157(7) 0.5384(5) 0.125(5) Uani 1 1 d . . . . . 
O17_14 O 0.6176(7) 0.2456(6) 0.0932(6) 0.131(4) Uani 1 1 d . . . . . 
O2_15 O 0.3193(4) 0.8173(4) 0.0697(4) 0.081(3) Uani 1 1 d . . . . . 
O1_16 O 0.3359(6) 0.3608(5) 0.5741(6) 0.121(4) Uani 1 1 d . . . . . 
O1_17 O 0.3089(5) 0.4383(6) 0.7236(5) 0.110(4) Uani 1 1 d . . . . . 
O2A_18 O 0.0907(7) 0.4561(8) 1.0169(6) 0.071(2) Uani 0.526(13) 1 d D U P B 1 
O2B_18 O 0.0882(8) 0.4126(9) 1.0125(7) 0.071(2) Uani 0.474(13) 1 d D U P B 2 
N_19 N 0.4761(7) 0.4194(5) 0.4179(5) 0.123(3) Uani 1 1 d G U . C 2 
O_19 O 0.5253(6) 0.3882(5) 0.3286(4) 0.112(2) Uani 1 1 d G U . C 2 
C1_19 C 0.5030(4) 0.3771(4) 0.3837(4) 0.119(3) Uani 1 1 d G U . C 2 
C2_19 C 0.5057(9) 0.3151(5) 0.4122(6) 0.124(4) Uani 1 1 d G U . C 2 
H2A_19 H 0.486384 0.314062 0.455294 0.187 Uiso 1 1 calc R U . C 2 
H2B_19 H 0.481598 0.304541 0.399764 0.187 Uiso 1 1 calc R U . C 2 
H2C_19 H 0.551011 0.286479 0.399924 0.187 Uiso 1 1 calc R U . C 2 
C3_19 C 0.4737(11) 0.4762(9) 0.3932(9) 0.126(4) Uani 1 1 d . U . C 2 
H3A_19 H 0.452348 0.501415 0.424656 0.190 Uiso 1 1 calc R U . C 2 
H3B_19 H 0.517907 0.474577 0.369662 0.190 Uiso 1 1 calc R U . C 2 
H3C_19 H 0.449270 0.493057 0.367617 0.190 Uiso 1 1 calc R U . C 2 
C4_19 C 0.4336(11) 0.4191(10) 0.4837(9) 0.134(4) Uani 1 1 d . U . C 2 
H4A_19 H 0.421000 0.456786 0.496395 0.201 Uiso 1 1 calc R U . C 2 
H4B_19 H 0.394587 0.414399 0.490856 0.201 Uiso 1 1 calc R U . C 2 
H4C_19 H 0.457746 0.385750 0.506029 0.201 Uiso 1 1 calc R U . C 2 
N_20 N 0.5242(4) 0.5681(4) 0.2625(5) 0.092(2) Uani 1 1 d G U . D 2 
O_20 O 0.4225(3) 0.6360(4) 0.2978(4) 0.0840(19) Uani 1 1 d G U . D 2 
C1_20 C 0.4815(3) 0.6184(3) 0.2864(3) 0.0876(19) Uani 1 1 d G U . D 2 
C2_20 C 0.5050(5) 0.6550(5) 0.2989(7) 0.092(2) Uani 1 1 d G U . D 2 
H2A_20 H 0.552152 0.635000 0.287425 0.138 Uiso 1 1 calc R U . D 2 
H2B_20 H 0.494228 0.694655 0.276161 0.138 Uiso 1 1 calc R U . D 2 
H2C_20 H 0.484076 0.659021 0.341213 0.138 Uiso 1 1 calc R U . D 2 
C3_20 C 0.5065(8) 0.5358(7) 0.2441(8) 0.096(2) Uani 1 1 d . U . D 2 
H3A_20 H 0.544552 0.500291 0.227826 0.143 Uiso 1 1 calc R U . D 2 
H3B_20 H 0.473240 0.523419 0.277979 0.143 Uiso 1 1 calc R U . D 2 
H3C_20 H 0.489140 0.560800 0.213680 0.143 Uiso 1 1 calc R U . D 2 
C4_20 C 0.5948(7) 0.5452(8) 0.2482(8) 0.100(3) Uani 1 1 d . U . D 2 
H4A_20 H 0.617259 0.507696 0.231056 0.150 Uiso 1 1 calc R U . D 2 
H4B_20 H 0.611840 0.574700 0.219813 0.150 Uiso 1 1 calc R U . D 2 
H4C_20 H 0.601712 0.538138 0.284487 0.150 Uiso 1 1 calc R U . D 2 
N_21 N 0.3762(7) 0.6614(3) 0.4775(7) 0.120(3) Uani 1 1 d G U . E 2 
O_21 O 0.3545(5) 0.7553(3) 0.4833(6) 0.107(2) Uani 1 1 d G U . E 2 
C1_21 C 0.3463(4) 0.7201(3) 0.4667(4) 0.111(2) Uani 1 1 d G U . E 2 
C2_21 C 0.3011(7) 0.7443(5) 0.4348(8) 0.114(3) Uani 1 1 d G U . E 2 
H2A_21 H 0.300264 0.710994 0.425009 0.172 Uiso 1 1 calc R U . E 2 
H2B_21 H 0.257345 0.768097 0.460330 0.172 Uiso 1 1 calc R U . E 2 
H2C_21 H 0.316379 0.769427 0.398358 0.172 Uiso 1 1 calc R U . E 2 
C3_21 C 0.4182(9) 0.6393(8) 0.5072(11) 0.127(3) Uani 1 1 d . U . E 2 
H3A_21 H 0.436579 0.595556 0.511913 0.191 Uiso 1 1 calc R U . E 2 
H3B_21 H 0.453280 0.653654 0.484148 0.191 Uiso 1 1 calc R U . E 2 
H3C_21 H 0.394037 0.653357 0.546209 0.191 Uiso 1 1 calc R U . E 2 
C4_21 C 0.3721(9) 0.6203(7) 0.4545(10) 0.124(3) Uani 1 1 d . U . E 2 
H4A_21 H 0.397354 0.579309 0.467323 0.186 Uiso 1 1 calc R U . E 2 
H4B_21 H 0.326684 0.626018 0.469330 0.186 Uiso 1 1 calc R U . E 2 
H4C_21 H 0.389469 0.627457 0.411214 0.186 Uiso 1 1 calc R U . E 2 
N_22 N 0.1003(3) 1.1004(4) 0.5495(4) 0.0818(19) Uani 1 1 d G U . F 2 
O_22 O 0.2065(3) 1.0597(3) 0.4942(4) 0.0733(18) Uani 1 1 d G U . F 2 
C1_22 C 0.1491(3) 1.0849(2) 0.4982(3) 0.0766(18) Uani 1 1 d G U . F 2 
C2_22 C 0.1345(5) 1.0990(5) 0.4440(4) 0.085(3) Uani 1 1 d G U . F 2 
H2A_22 H 0.087442 1.118584 0.454766 0.127 Uiso 1 1 calc R U . F 2 
H2B_22 H 0.154972 1.125649 0.414180 0.127 Uiso 1 1 calc R U . F 2 
H2C_22 H 0.151449 1.061885 0.427907 0.127 Uiso 1 1 calc R U . F 2 
C3_22 C 0.1128(7) 1.0845(6) 0.6028(8) 0.091(3) Uani 1 1 d . U . F 2 
H3A_22 H 0.071717 1.099228 0.636302 0.137 Uiso 1 1 calc R U . F 2 
H3B_22 H 0.133649 1.040918 0.610255 0.137 Uiso 1 1 calc R U . F 2 
H3C_22 H 0.141368 1.102465 0.597858 0.137 Uiso 1 1 calc R U . F 2 
C4_22 C 0.0313(7) 1.1315(6) 0.5566(8) 0.093(3) Uani 1 1 d . U . F 2 
H4A_22 H 0.003812 1.138507 0.597995 0.139 Uiso 1 1 calc R U . F 2 
H4B_22 H 0.024878 1.169884 0.531249 0.139 Uiso 1 1 calc R U . F 2 
H4C_22 H 0.019778 1.106796 0.545301 0.139 Uiso 1 1 calc R U . F 2 
N_23 N -0.1582(5) 0.6898(5) 0.6019(5) 0.110(2) Uani 1 1 d G U . G 2 
O_23 O -0.1075(4) 0.7483(4) 0.5849(5) 0.100(2) Uani 1 1 d G U . G 2 
C1_23 C -0.1274(3) 0.7253(3) 0.5659(4) 0.105(2) Uani 1 1 d G U . G 2 
C2_23 C -0.1174(7) 0.7385(6) 0.5015(4) 0.104(3) Uani 1 1 d G U . G 2 
H2A_23 H -0.135740 0.717093 0.494032 0.156 Uiso 1 1 calc R U . G 2 
H2B_23 H -0.139044 0.781536 0.491509 0.156 Uiso 1 1 calc R U . G 2 
H2C_23 H -0.070894 0.725424 0.477029 0.156 Uiso 1 1 calc R U . G 2 
C3_23 C -0.1624(8) 0.6801(9) 0.6614(9) 0.118(3) Uani 1 1 d . U . G 2 
H3A_23 H -0.185431 0.653793 0.686006 0.177 Uiso 1 1 calc R U . G 2 
H3B_23 H -0.118602 0.661527 0.661372 0.177 Uiso 1 1 calc R U . G 2 
H3C_23 H -0.185920 0.718482 0.677268 0.177 Uiso 1 1 calc R U . G 2 
C4_23 C -0.1715(8) 0.6584(8) 0.5726(9) 0.110(3) Uani 1 1 d . U . G 2 
H4A_23 H -0.194220 0.633505 0.602688 0.165 Uiso 1 1 calc R U . G 2 
H4B_23 H -0.198503 0.688001 0.550757 0.165 Uiso 1 1 calc R U . G 2 
H4C_23 H -0.130400 0.633187 0.545110 0.165 Uiso 1 1 calc R U . G 2 
NA_24 N 0.2781(8) 0.0798(7) 0.5764(8) 0.0826(10) Uani 0.558(13) 1 d G U P H 1 
OA_24 O 0.2016(9) 0.1670(5) 0.6098(8) 0.0823(10) Uani 0.558(13) 1 d G U P H 1 
C1A_24 C 0.2379(6) 0.1141(5) 0.6197(6) 0.0825(10) Uani 0.558(13) 1 d G U P H 1 
C2A_24 C 0.2369(12) 0.0888(8) 0.6813(7) 0.0854(19) Uani 0.558(13) 1 d G U P H 1 
H2AA_24 H 0.267895 0.047106 0.681346 0.128 Uiso 0.558(13) 1 calc R U P H 1 
H2AB_24 H 0.248777 0.112082 0.694128 0.128 Uiso 0.558(13) 1 calc R U P H 1 
H2AC_24 H 0.193221 0.090761 0.708459 0.128 Uiso 0.558(13) 1 calc R U P H 1 
C3A_24 C 0.2914(14) 0.0974(11) 0.5226(14) 0.0834(16) Uani 0.558(13) 1 d . U P H 1 
H3AA_24 H 0.322238 0.063357 0.499968 0.125 Uiso 0.558(13) 1 calc R U P H 1 
H3AB_24 H 0.251664 0.116215 0.514782 0.125 Uiso 0.558(13) 1 calc R U P H 1 
H3AC_24 H 0.310655 0.126535 0.510802 0.125 Uiso 0.558(13) 1 calc R U P H 1 
C4A_24 C 0.3216(12) 0.0144(13) 0.5910(17) 0.0821(19) Uani 0.558(13) 1 d . U P H 1 
H4AA_24 H 0.307955 0.004170 0.634014 0.123 Uiso 0.558(13) 1 calc R U P H 1 
H4AB_24 H 0.317518 -0.012432 0.574743 0.123 Uiso 0.558(13) 1 calc R U P H 1 
H4AC_24 H 0.366882 0.009917 0.573527 0.123 Uiso 0.558(13) 1 calc R U P H 1 
NB_24 N 0.2664(11) 0.0721(7) 0.6140(10) 0.0826(10) Uani 0.442(13) 1 d G U P H 2 
OB_24 O 0.2075(11) 0.1684(7) 0.5924(10) 0.0823(10) Uani 0.442(13) 1 d G U P H 2 
C1B_24 C 0.2507(7) 0.1193(6) 0.5754(8) 0.0825(10) Uani 0.442(13) 1 d G U P H 2 
C2B_24 C 0.2851(14) 0.1131(11) 0.5102(8) 0.0834(16) Uani 0.442(13) 1 d G U P H 2 
H2BA_24 H 0.317249 0.072088 0.504465 0.125 Uiso 0.442(13) 1 calc R U P H 2 
H2BB_24 H 0.253449 0.122218 0.493870 0.125 Uiso 0.442(13) 1 calc R U P H 2 
H2BC_24 H 0.306901 0.140905 0.489849 0.125 Uiso 0.442(13) 1 calc R U P H 2 
C3B_24 C 0.2050(16) 0.0876(13) 0.6814(17) 0.0854(19) Uani 0.442(13) 1 d . U P H 2 
H3BA_24 H 0.214718 0.053666 0.711263 0.128 Uiso 0.442(13) 1 calc R U P H 2 
H3BB_24 H 0.200722 0.123252 0.691787 0.128 Uiso 0.442(13) 1 calc R U P H 2 
H3BC_24 H 0.164343 0.094831 0.679808 0.128 Uiso 0.442(13) 1 calc R U P H 2 
C4B_24 C 0.3018(16) 0.0140(16) 0.604(2) 0.0821(19) Uani 0.442(13) 1 d . U P H 2 
H4BA_24 H 0.305420 -0.010897 0.640838 0.123 Uiso 0.442(13) 1 calc R U P H 2 
H4BB_24 H 0.280444 0.001563 0.590049 0.123 Uiso 0.442(13) 1 calc R U P H 2 
H4BC_24 H 0.345229 0.009551 0.573964 0.123 Uiso 0.442(13) 1 calc R U P H 2 
N_25 N 0.2907(11) 0.6597(7) 0.6634(10) 0.178(4) Uani 1 1 d G U . . . 
O_25 O 0.2662(8) 0.6163(5) 0.6201(9) 0.175(4) Uani 1 1 d G U . . . 
C1_25 C 0.2631(6) 0.6626(5) 0.6296(6) 0.177(4) Uani 1 1 d G U . . . 
C2_25 C 0.2282(12) 0.7228(5) 0.6016(12) 0.177(5) Uani 1 1 d G U . . . 
H2A_25 H 0.230244 0.754167 0.613433 0.266 Uiso 1 1 calc R U . . . 
H2B_25 H 0.249027 0.724102 0.558410 0.266 Uiso 1 1 calc R U . . . 
H2C_25 H 0.182827 0.729356 0.614668 0.266 Uiso 1 1 calc R U . . . 
C3_25 C 0.3226(14) 0.6025(11) 0.6887(14) 0.187(5) Uani 1 1 d . U . . . 
H3A_25 H 0.340872 0.606225 0.712561 0.281 Uiso 1 1 calc R U . . . 
H3B_25 H 0.291535 0.583754 0.713912 0.281 Uiso 1 1 calc R U . . . 
H3C_25 H 0.357512 0.577907 0.657204 0.281 Uiso 1 1 calc R U . . . 
C4_25 C 0.2907(13) 0.7103(10) 0.6735(14) 0.179(5) Uani 1 1 d . U . . . 
H4A_25 H 0.313604 0.698061 0.699626 0.268 Uiso 1 1 calc R U . . . 
H4B_25 H 0.312484 0.730140 0.635690 0.268 Uiso 1 1 calc R U . . . 
H4C_25 H 0.245857 0.738026 0.692052 0.268 Uiso 1 1 calc R U . . . 
N_26 N 0.3210(8) 0.4842(7) 0.3880(7) 0.155(4) Uani 1 1 d G U . . . 
O_26 O 0.2814(6) 0.5237(7) 0.4710(5) 0.152(4) Uani 1 1 d G U . . . 
C1_26 C 0.3006(4) 0.5296(5) 0.4159(5) 0.154(4) Uani 1 1 d G U . . . 
C2_26 C 0.3000(9) 0.5892(7) 0.3805(7) 0.149(5) Uani 1 1 d G U . . . 
H2A_26 H 0.316549 0.586134 0.338368 0.223 Uiso 1 1 calc R U . . . 
H2B_26 H 0.255563 0.619422 0.392967 0.223 Uiso 1 1 calc R U . . . 
H2C_26 H 0.327591 0.600750 0.387184 0.223 Uiso 1 1 calc R U . . . 
C3_26 C 0.3127(11) 0.4296(12) 0.4299(11) 0.160(5) Uani 1 1 d . U . . . 
H3A_26 H 0.328337 0.397540 0.407129 0.240 Uiso 1 1 calc R U . . . 
H3B_26 H 0.337596 0.416461 0.454457 0.240 Uiso 1 1 calc R U . . . 
H3C_26 H 0.266689 0.439441 0.455256 0.240 Uiso 1 1 calc R U . . . 
C4_26 C 0.3483(11) 0.4936(12) 0.3236(11) 0.157(5) Uani 1 1 d . U . . . 
H4A_26 H 0.361517 0.457210 0.308075 0.236 Uiso 1 1 calc R U . . . 
H4B_26 H 0.315703 0.526800 0.309420 0.236 Uiso 1 1 calc R U . . . 
H4C_26 H 0.386178 0.502985 0.309933 0.236 Uiso 1 1 calc R U . . . 
N_27 N 0.4608(5) 0.2475(6) 0.6650(7) 0.136(3) Uani 1 1 d G U . . . 
O_27 O 0.3678(5) 0.3288(5) 0.6777(6) 0.131(3) Uani 1 1 d G U . . . 
C1_27 C 0.4024(4) 0.2815(5) 0.6993(5) 0.136(3) Uani 1 1 d G U . . . 
C2_27 C 0.3780(8) 0.2630(8) 0.7652(5) 0.144(4) Uani 1 1 d G U . . . 
H2A_27 H 0.410759 0.225206 0.774593 0.217 Uiso 1 1 calc R U . . . 
H2B_27 H 0.369757 0.293891 0.785572 0.217 Uiso 1 1 calc R U . . . 
H2C_27 H 0.337774 0.257751 0.778087 0.217 Uiso 1 1 calc R U . . . 
C3_27 C 0.4826(10) 0.2719(10) 0.6026(10) 0.137(4) Uani 1 1 d . U . . . 
H3A_27 H 0.525952 0.243957 0.580881 0.205 Uiso 1 1 calc R U . . . 
H3B_27 H 0.452341 0.277693 0.586087 0.205 Uiso 1 1 calc R U . . . 
H3C_27 H 0.484093 0.310291 0.599030 0.205 Uiso 1 1 calc R U . . . 
C4_27 C 0.5035(10) 0.1908(10) 0.6876(11) 0.143(4) Uani 1 1 d . U . . . 
H4A_27 H 0.544032 0.173440 0.654648 0.215 Uiso 1 1 calc R U . . . 
H4B_27 H 0.512991 0.198445 0.716332 0.215 Uiso 1 1 calc R U . . . 
H4C_27 H 0.481715 0.162945 0.706823 0.215 Uiso 1 1 calc R U . . . 
  
loop_ 
 _atom_site_aniso_label 
 _atom_site_aniso_U_11 
 _atom_site_aniso_U_22 
 _atom_site_aniso_U_33 
 _atom_site_aniso_U_23 
 _atom_site_aniso_U_13 
 _atom_site_aniso_U_12 
Cu1 0.0896(11) 0.0592(9) 0.0896(12) -0.0192(8) -0.0593(9) -0.0040(8) 
Cu2 0.0983(12) 0.0669(10) 0.0931(12) -0.0261(9) -0.0635(10) 0.0014(9) 
Cu3 0.0490(8) 0.0608(8) 0.0643(9) -0.0141(7) -0.0293(7) -0.0115(6) 
Cu4 0.0500(8) 0.0612(8) 0.0677(9) -0.0122(7) -0.0314(7) -0.0109(7) 
Cu5 0.0477(8) 0.0426(7) 0.0931(10) -0.0146(7) -0.0409(7) -0.0094(6) 
Cu6 0.0484(8) 0.0441(7) 0.0941(11) -0.0147(7) -0.0426(7) -0.0090(6) 
Cu7 0.0418(8) 0.0551(8) 0.0809(10) -0.0103(7) -0.0325(7) -0.0114(6) 
Cu8 0.0428(8) 0.0509(8) 0.0808(10) -0.0046(7) -0.0321(7) -0.0139(6) 
Cu9 0.0493(10) 0.0907(12) 0.0639(10) -0.0071(9) -0.0244(8) -0.0176(8) 
Cu10 0.0500(10) 0.1057(13) 0.0645(11) -0.0029(10) -0.0234(8) -0.0110(9) 
Cu11 0.0576(10) 0.0516(8) 0.1208(13) -0.0116(8) -0.0460(9) -0.0219(7) 
Cu12 0.0610(10) 0.0521(8) 0.1316(13) -0.0041(9) -0.0557(9) -0.0227(7) 
O1_1 0.0915(17) 0.0611(17) 0.0959(18) -0.0187(15) -0.0588(16) -0.0077(15) 
O2_1 0.0965(18) 0.0656(17) 0.0991(18) -0.0222(16) -0.0609(16) -0.0043(15) 
O3_1 0.0653(17) 0.0549(16) 0.1216(18) -0.0121(16) -0.0485(15) -0.0191(14) 
O4_1 0.0681(17) 0.0546(16) 0.1289(18) -0.0085(16) -0.0526(16) -0.0198(14) 
C1_1 0.0924(18) 0.0636(17) 0.1013(18) -0.0202(16) -0.0596(16) -0.0082(15) 
C2_1 0.090(2) 0.0650(19) 0.110(2) -0.0193(18) -0.0593(18) -0.0122(17) 
C3_1 0.092(2) 0.068(2) 0.116(2) -0.020(2) -0.059(2) -0.0146(19) 
C4_1 0.093(2) 0.071(2) 0.121(2) -0.021(2) -0.057(2) -0.0174(19) 
C5_1 0.087(2) 0.067(2) 0.121(2) -0.018(2) -0.057(2) -0.0168(19) 
C6_1 0.081(2) 0.0624(19) 0.119(2) -0.0155(18) -0.0563(18) -0.0157(17) 
C7_1 0.085(2) 0.064(2) 0.114(2) -0.018(2) -0.0579(19) -0.0142(19) 
C8_1 0.0707(17) 0.0568(17) 0.1227(18) -0.0123(16) -0.0529(16) -0.0185(14) 
O5_1 0.100(3) 0.077(3) 0.126(3) -0.024(2) -0.055(2) -0.022(2) 
C9_1 0.102(3) 0.080(3) 0.128(3) -0.025(3) -0.053(3) -0.023(3) 
C10_1 0.103(4) 0.082(3) 0.130(4) -0.025(3) -0.053(3) -0.023(3) 
C11_1 0.110(5) 0.085(5) 0.134(5) -0.025(5) -0.046(5) -0.020(4) 
O1_2 0.0889(17) 0.0609(17) 0.0879(17) -0.0203(15) -0.0581(15) -0.0036(15) 
O2_2 0.0936(18) 0.0650(17) 0.0907(18) -0.0249(15) -0.0598(15) -0.0016(15) 
O3_2 0.0560(16) 0.0616(16) 0.0687(16) -0.0146(15) -0.0327(14) -0.0110(14) 
O4_2 0.0565(16) 0.0630(16) 0.0704(17) -0.0144(15) -0.0331(14) -0.0097(14) 
C1_2 0.0874(17) 0.0636(16) 0.0869(17) -0.0221(15) -0.0564(15) -0.0040(15) 
C2_2 0.0803(19) 0.0647(18) 0.0821(19) -0.0204(17) -0.0510(16) -0.0063(17) 
C3_2 0.079(2) 0.066(2) 0.081(2) -0.0197(19) -0.0501(19) -0.0072(19) 
C4_2 0.078(2) 0.067(2) 0.081(2) -0.0187(18) -0.0484(18) -0.0079(18) 
C5_2 0.074(2) 0.066(2) 0.079(2) -0.0182(19) -0.0449(19) -0.0085(19) 
C6_2 0.0700(19) 0.0645(18) 0.0768(19) -0.0181(16) -0.0422(16) -0.0090(16) 
C7_2 0.075(2) 0.064(2) 0.079(2) -0.0195(18) -0.0466(18) -0.0077(18) 
C8_2 0.0607(17) 0.0630(16) 0.0717(16) -0.0158(15) -0.0358(14) -0.0101(15) 
O5_2 0.082(2) 0.070(2) 0.082(3) -0.019(2) -0.049(2) -0.008(2) 
C9_2 0.085(3) 0.072(3) 0.084(3) -0.019(2) -0.049(2) -0.010(2) 
C10_2 0.087(3) 0.074(3) 0.085(3) -0.019(3) -0.048(3) -0.011(3) 
C11_2 0.091(5) 0.077(4) 0.088(5) -0.019(4) -0.045(4) -0.017(4) 
O1_3 0.0958(18) 0.0681(17) 0.0910(18) -0.0204(16) -0.0578(16) -0.0044(15) 
O2_3 0.1015(18) 0.0725(17) 0.0936(18) -0.0228(16) -0.0583(16) -0.0005(15) 
O3_3 0.109(3) 0.089(3) 0.091(3) -0.020(3) -0.051(3) -0.016(3) 
O4_3 0.111(3) 0.090(3) 0.091(3) -0.020(3) -0.051(3) -0.016(3) 
C1_3 0.1027(19) 0.0749(18) 0.0924(18) -0.0219(17) -0.0559(17) -0.0048(16) 
C2_3 0.112(2) 0.084(2) 0.094(2) -0.023(2) -0.050(2) -0.0112(19) 
C3_3 0.120(3) 0.091(3) 0.097(3) -0.024(2) -0.044(2) -0.015(2) 
C4_3 0.127(3) 0.098(3) 0.099(3) -0.025(2) -0.040(2) -0.018(2) 
C5_3 0.122(3) 0.094(3) 0.096(3) -0.023(2) -0.042(2) -0.016(2) 
C6_3 0.115(3) 0.090(3) 0.093(3) -0.022(2) -0.048(2) -0.015(2) 
C7_3 0.113(3) 0.087(3) 0.093(3) -0.022(2) -0.050(2) -0.013(2) 
C8_3 0.112(3) 0.090(3) 0.091(3) -0.020(3) -0.050(2) -0.015(2) 
O5_3 0.138(3) 0.108(3) 0.104(3) -0.027(3) -0.034(3) -0.021(3) 
C9_3 0.141(4) 0.114(4) 0.107(4) -0.027(3) -0.034(3) -0.022(3) 
C10_3 0.145(4) 0.119(4) 0.110(4) -0.026(4) -0.032(4) -0.021(4) 
C11_3 0.148(6) 0.126(5) 0.114(5) -0.027(5) -0.034(4) -0.023(5) 
O1_4 0.0533(16) 0.0625(16) 0.0712(17) -0.0151(15) -0.0312(14) -0.0135(14) 
O2_4 0.0535(16) 0.0624(16) 0.0725(16) -0.0128(15) -0.0322(14) -0.0119(14) 
O3_4 0.0527(16) 0.0491(15) 0.0936(17) -0.0161(15) -0.0395(14) -0.0104(14) 
O4_4 0.0531(16) 0.0488(15) 0.0939(17) -0.0158(15) -0.0412(14) -0.0112(14) 
C1_4 0.0554(16) 0.0627(16) 0.0758(17) -0.0145(15) -0.0336(14) -0.0135(15) 
C2_4 0.0604(19) 0.0624(18) 0.0842(19) -0.0145(17) -0.0370(16) -0.0151(16) 
C3_4 0.067(2) 0.064(2) 0.089(2) -0.0139(19) -0.0395(19) -0.0155(19) 
C4_4 0.073(2) 0.065(2) 0.093(2) -0.014(2) -0.0413(19) -0.0147(19) 
C5_4 0.067(2) 0.062(2) 0.093(2) -0.014(2) -0.0407(19) -0.0146(19) 
C6_4 0.0599(19) 0.0584(18) 0.0910(19) -0.0150(17) -0.0401(16) -0.0147(16) 
C7_4 0.059(2) 0.060(2) 0.087(2) -0.0149(18) -0.0392(18) -0.0157(18) 
C8_4 0.0546(16) 0.0518(15) 0.0928(17) -0.0161(15) -0.0408(15) -0.0132(14) 
O5_4 0.084(3) 0.069(3) 0.099(3) -0.012(2) -0.042(2) -0.012(2) 
C9_4 0.100(5) 0.071(4) 0.110(5) -0.014(4) -0.044(4) -0.010(4) 
O1_5 0.0501(15) 0.0643(16) 0.0678(16) -0.0131(15) -0.0282(14) -0.0120(14) 
O2_5 0.0506(15) 0.0630(16) 0.0701(16) -0.0132(15) -0.0308(14) -0.0128(14) 
O3_5 0.0448(15) 0.0581(16) 0.0809(16) -0.0103(15) -0.0296(14) -0.0154(14) 
O4_5 0.0460(15) 0.0552(16) 0.0817(16) -0.0076(15) -0.0299(14) -0.0160(14) 
C1_5 0.0508(15) 0.0639(17) 0.0707(16) -0.0146(15) -0.0297(14) -0.0143(15) 
C2_5 0.0510(17) 0.0663(19) 0.0747(18) -0.0143(17) -0.0310(16) -0.0167(16) 
C3_5 0.052(2) 0.073(2) 0.078(2) -0.015(2) -0.0326(18) -0.0162(19) 
C4_5 0.0531(19) 0.078(2) 0.081(2) -0.014(2) -0.0332(17) -0.0177(19) 
C5_5 0.051(2) 0.071(2) 0.080(2) -0.013(2) -0.0314(18) -0.0191(19) 
C6_5 0.0490(17) 0.0635(19) 0.0790(18) -0.0124(18) -0.0304(16) -0.0193(16) 
C7_5 0.0496(19) 0.063(2) 0.076(2) -0.0137(19) -0.0305(18) -0.0183(18) 
C8_5 0.0467(15) 0.0582(16) 0.0806(16) -0.0102(16) -0.0297(14) -0.0175(15) 
O5_5 0.056(2) 0.090(3) 0.086(3) -0.014(2) -0.035(2) -0.017(2) 
C9_5 0.058(3) 0.095(3) 0.089(3) -0.014(3) -0.036(2) -0.017(3) 
C10_5 0.064(4) 0.109(5) 0.096(5) -0.017(4) -0.040(4) -0.016(4) 
O1_6 0.0509(16) 0.0677(17) 0.0663(16) -0.0103(15) -0.0277(14) -0.0107(14) 
O2_6 0.0522(15) 0.0686(17) 0.0677(17) -0.0094(15) -0.0291(14) -0.0105(15) 
O3_6 0.053(3) 0.094(3) 0.066(3) -0.006(3) -0.024(2) -0.016(2) 
O4_6 0.053(3) 0.094(3) 0.067(3) -0.005(3) -0.024(2) -0.013(3) 
C1_6 0.0524(16) 0.0733(18) 0.0665(17) -0.0093(16) -0.0286(14) -0.0119(15) 
C2_6 0.0548(18) 0.085(2) 0.068(2) -0.0067(19) -0.0273(17) -0.0138(18) 
C3_6 0.059(2) 0.094(3) 0.070(2) -0.004(2) -0.026(2) -0.013(2) 
C4_6 0.064(2) 0.103(3) 0.073(2) 0.000(2) -0.023(2) -0.012(2) 
C5_6 0.061(2) 0.099(3) 0.070(2) -0.002(2) -0.024(2) -0.013(2) 
C6_6 0.056(2) 0.094(2) 0.068(2) -0.005(2) -0.0255(19) -0.014(2) 
C7_6 0.055(2) 0.088(2) 0.067(2) -0.007(2) -0.0269(19) -0.015(2) 
C8_6 0.054(2) 0.094(3) 0.067(2) -0.005(2) -0.024(2) -0.015(2) 
O5_6 0.073(3) 0.115(3) 0.078(3) 0.005(3) -0.020(2) -0.010(3) 
C9_6 0.079(3) 0.122(3) 0.083(3) 0.006(3) -0.018(3) -0.010(3) 
C10_6 0.084(4) 0.126(4) 0.087(4) 0.007(3) -0.017(3) -0.009(3) 
C11_6 0.096(5) 0.136(5) 0.099(5) 0.006(5) -0.013(4) -0.008(5) 
O1_7 0.0488(15) 0.0479(15) 0.1002(18) -0.0137(15) -0.0423(14) -0.0108(13) 
O2_7 0.0505(15) 0.0481(15) 0.1003(18) -0.0136(15) -0.0419(14) -0.0117(13) 
O3_7 0.057(3) 0.058(2) 0.128(3) -0.008(3) -0.048(3) -0.024(2) 
O4_7 0.055(3) 0.060(3) 0.128(3) -0.007(3) -0.051(2) -0.022(2) 
C1_7 0.0510(16) 0.0500(15) 0.1047(19) -0.0134(16) -0.0444(15) -0.0136(13) 
C2_7 0.0545(18) 0.0543(18) 0.115(2) -0.0124(18) -0.0472(18) -0.0173(15) 
C3_7 0.059(2) 0.057(2) 0.121(3) -0.012(2) -0.047(2) -0.0188(18) 
C4_7 0.063(2) 0.060(2) 0.127(3) -0.011(2) -0.046(2) -0.0204(17) 
C5_7 0.060(2) 0.059(2) 0.126(3) -0.010(2) -0.047(2) -0.0210(19) 
C6_7 0.057(2) 0.058(2) 0.124(3) -0.010(2) -0.048(2) -0.0211(17) 
C7_7 0.055(2) 0.056(2) 0.119(3) -0.012(2) -0.048(2) -0.0194(18) 
C8_7 0.056(2) 0.059(2) 0.127(3) -0.008(2) -0.049(2) -0.0226(19) 
O5_7 0.069(3) 0.062(2) 0.135(3) -0.011(2) -0.043(2) -0.021(2) 
C9_7 0.072(3) 0.065(3) 0.138(4) -0.011(3) -0.045(3) -0.019(2) 
C10_7 0.074(3) 0.065(3) 0.140(4) -0.011(3) -0.046(3) -0.019(3) 
C11_7 0.081(5) 0.069(5) 0.145(5) -0.006(4) -0.042(4) -0.014(4) 
O1_8 0.0567(16) 0.0478(15) 0.0946(17) -0.0113(15) -0.0415(15) -0.0086(14) 
O2_8 0.0564(16) 0.0479(15) 0.0951(17) -0.0125(15) -0.0425(15) -0.0084(14) 
O3_8 0.087(3) 0.069(3) 0.094(3) -0.018(3) -0.058(3) -0.004(3) 
O4_8 0.087(3) 0.070(3) 0.095(3) -0.019(3) -0.056(3) -0.003(3) 
C1_8 0.0606(17) 0.0512(16) 0.0949(18) -0.0126(15) -0.0453(15) -0.0093(15) 
C2_8 0.070(2) 0.0586(19) 0.096(2) -0.0140(18) -0.0496(18) -0.0099(18) 
C3_8 0.077(2) 0.064(2) 0.098(2) -0.015(2) -0.050(2) -0.009(2) 
C4_8 0.083(2) 0.068(2) 0.100(2) -0.015(2) -0.051(2) -0.008(2) 
C5_8 0.082(2) 0.067(2) 0.098(3) -0.016(2) -0.052(2) -0.008(2) 
C6_8 0.080(2) 0.065(2) 0.096(2) -0.017(2) -0.054(2) -0.008(2) 
C7_8 0.075(2) 0.061(2) 0.096(2) -0.016(2) -0.052(2) -0.010(2) 
C8_8 0.085(3) 0.068(2) 0.095(3) -0.018(2) -0.055(2) -0.005(2) 
O5_8 0.091(3) 0.074(3) 0.103(3) -0.015(2) -0.049(2) -0.006(2) 
C9_8 0.098(3) 0.080(3) 0.105(3) -0.017(3) -0.049(3) -0.004(3) 
C10_8 0.104(4) 0.085(3) 0.108(4) -0.016(3) -0.046(3) -0.002(3) 
C11_8 0.115(5) 0.095(5) 0.114(5) -0.020(5) -0.047(4) -0.002(5) 
O1_9 0.0489(15) 0.0467(15) 0.0952(18) -0.0132(15) -0.0384(14) -0.0098(13) 
O2_9 0.0486(15) 0.0477(15) 0.0948(18) -0.0128(15) -0.0406(14) -0.0098(13) 
O3_9 0.0453(15) 0.0562(15) 0.0838(17) -0.0109(15) -0.0319(14) -0.0135(13) 
O4_9 0.0448(15) 0.0525(15) 0.0835(17) -0.0079(15) -0.0337(14) -0.0134(13) 
C1_9 0.0482(15) 0.0489(15) 0.0938(18) -0.0131(15) -0.0391(15) -0.0105(13) 
C2_9 0.0478(17) 0.0528(17) 0.091(2) -0.0136(17) -0.0379(16) -0.0118(15) 
C3_9 0.0485(19) 0.055(2) 0.092(2) -0.015(2) -0.0363(19) -0.0126(17) 
C4_9 0.0493(19) 0.0566(19) 0.093(2) -0.0143(19) -0.0340(18) -0.0131(16) 
C5_9 0.048(2) 0.056(2) 0.090(2) -0.014(2) -0.0351(19) -0.0135(17) 
C6_9 0.0472(17) 0.0550(17) 0.087(2) -0.0132(17) -0.0363(16) -0.0134(15) 
C7_9 0.0476(18) 0.0536(19) 0.089(2) -0.0130(19) -0.0364(18) -0.0124(16) 
C8_9 0.0460(15) 0.0550(16) 0.0844(17) -0.0108(15) -0.0341(15) -0.0139(13) 
O5_9 0.051(2) 0.059(2) 0.097(3) -0.015(2) -0.031(2) -0.0121(18) 
C9_9 0.053(3) 0.060(3) 0.098(3) -0.017(2) -0.030(2) -0.011(2) 
C10_9 0.054(3) 0.061(3) 0.099(3) -0.017(3) -0.030(3) -0.011(3) 
C11_9 0.060(4) 0.061(4) 0.103(5) -0.018(4) -0.026(4) -0.009(4) 
O1_10 0.0470(15) 0.0541(16) 0.0888(17) -0.0070(15) -0.0326(15) -0.0120(14) 
O2_10 0.0483(15) 0.0524(15) 0.0900(17) -0.0039(15) -0.0315(15) -0.0140(14) 
O3_10 0.0594(16) 0.0522(16) 0.1224(19) -0.0086(16) -0.0443(16) -0.0202(14) 
O4_10 0.0613(16) 0.0517(16) 0.1272(19) -0.0048(16) -0.0499(16) -0.0200(14) 
C1_10 0.0503(15) 0.0547(16) 0.0950(18) -0.0042(16) -0.0341(15) -0.0137(14) 
C2_10 0.0556(18) 0.0560(18) 0.106(2) -0.0028(18) -0.0373(17) -0.0160(16) 
C3_10 0.058(2) 0.060(2) 0.113(2) -0.001(2) -0.039(2) -0.0173(18) 
C4_10 0.061(2) 0.063(2) 0.120(3) 0.001(2) -0.039(2) -0.0198(18) 
C5_10 0.060(2) 0.059(2) 0.118(2) -0.002(2) -0.042(2) -0.0201(18) 
C6_10 0.0591(18) 0.0557(18) 0.116(2) -0.0036(18) -0.0426(17) -0.0186(16) 
C7_10 0.058(2) 0.056(2) 0.111(2) -0.003(2) -0.0399(19) -0.0168(18) 
C8_10 0.0599(16) 0.0528(16) 0.1218(19) -0.0058(16) -0.0457(16) -0.0197(14) 
O5_10 0.065(3) 0.071(3) 0.127(3) 0.004(3) -0.039(2) -0.022(2) 
C9_10 0.074(4) 0.076(4) 0.141(5) 0.004(4) -0.034(4) -0.024(3) 
O1_11 0.0459(15) 0.0649(16) 0.0796(15) -0.0080(15) -0.0292(14) -0.0095(14) 
O2_11 0.0486(15) 0.0647(16) 0.0807(16) -0.0027(15) -0.0281(14) -0.0087(14) 
O3_11 0.0509(15) 0.0918(17) 0.0677(16) -0.0038(16) -0.0238(14) -0.0135(15) 
O4_11 0.0532(16) 0.0999(17) 0.0686(16) -0.0015(16) -0.0222(14) -0.0087(15) 
C1_11 0.0490(13) 0.0723(13) 0.0779(13) -0.0047(13) -0.0274(12) -0.0107(13) 
C2A_11 0.0510(10) 0.0789(10) 0.0757(10) -0.0046(10) -0.0257(9) -0.0131(10) 
C3A_11 0.0515(11) 0.0799(11) 0.0757(11) -0.0047(11) -0.0250(10) -0.0137(11) 
C4A_11 0.0525(13) 0.0816(13) 0.0754(13) -0.0047(13) -0.0239(12) -0.0146(13) 
C5A_11 0.0520(11) 0.0830(11) 0.0742(11) -0.0046(11) -0.0247(10) -0.0141(11) 
C6A_11 0.0518(10) 0.0839(10) 0.0736(10) -0.0043(10) -0.0249(9) -0.0134(10) 
C7A_11 0.0514(10) 0.0814(10) 0.0745(10) -0.0045(10) -0.0255(9) -0.0134(10) 
C2B_11 0.0510(10) 0.0789(10) 0.0757(10) -0.0046(10) -0.0257(9) -0.0131(10) 
C3B_11 0.0515(11) 0.0799(11) 0.0757(11) -0.0047(11) -0.0250(10) -0.0137(11) 
C4B_11 0.0525(13) 0.0816(13) 0.0754(13) -0.0047(13) -0.0239(12) -0.0146(13) 
C5B_11 0.0520(11) 0.0830(11) 0.0742(11) -0.0046(11) -0.0247(10) -0.0141(11) 
C6B_11 0.0518(10) 0.0839(10) 0.0736(10) -0.0043(10) -0.0249(9) -0.0134(10) 
C7B_11 0.0514(10) 0.0814(10) 0.0745(10) -0.0045(10) -0.0255(9) -0.0134(10) 
C8_11 0.0527(13) 0.0907(14) 0.0709(13) -0.0029(13) -0.0236(12) -0.0117(13) 
O5A_11 0.0544(17) 0.0824(19) 0.0770(18) -0.0050(18) -0.0214(16) -0.0156(17) 
C9A_11 0.056(2) 0.082(2) 0.077(2) -0.006(2) -0.020(2) -0.018(2) 
C10A_11 0.057(2) 0.083(3) 0.078(3) -0.006(2) -0.019(2) -0.018(2) 
C11A_11 0.060(4) 0.084(4) 0.079(4) -0.006(3) -0.018(3) -0.020(3) 
O5B_11 0.0544(17) 0.0824(19) 0.0770(18) -0.0050(18) -0.0214(16) -0.0156(17) 
C9B_11 0.056(2) 0.082(2) 0.077(2) -0.006(2) -0.020(2) -0.018(2) 
C10B_11 0.057(2) 0.083(3) 0.078(3) -0.006(2) -0.019(2) -0.018(2) 
C11B_11 0.060(4) 0.084(4) 0.079(4) -0.006(3) -0.018(3) -0.020(3) 
O1_12 0.0623(17) 0.0622(16) 0.1197(18) -0.0092(16) -0.0451(16) -0.0226(14) 
O2_12 0.0639(17) 0.0631(16) 0.1266(18) -0.0043(16) -0.0490(16) -0.0228(14) 
O3_12 0.0540(17) 0.0937(18) 0.0730(17) -0.0064(16) -0.0245(15) -0.0200(15) 
O4_12 0.0543(17) 0.1028(18) 0.0740(17) -0.0031(16) -0.0239(15) -0.0166(16) 
C1_12 0.0637(17) 0.0694(17) 0.1189(18) -0.0060(16) -0.0443(16) -0.0247(15) 
C2_12 0.065(2) 0.083(2) 0.112(2) -0.0039(19) -0.0381(18) -0.0268(17) 
C3_12 0.063(2) 0.089(2) 0.103(2) -0.004(2) -0.036(2) -0.0265(19) 
C4_12 0.062(2) 0.094(2) 0.096(2) -0.0029(19) -0.0310(18) -0.0249(17) 
C5_12 0.068(2) 0.096(2) 0.104(2) -0.002(2) -0.030(2) -0.027(2) 
C6_12 0.072(2) 0.096(2) 0.111(3) -0.002(2) -0.030(2) -0.030(2) 
C7_12 0.069(2) 0.090(2) 0.112(2) -0.003(2) -0.034(2) -0.029(2) 
C8_12 0.0562(17) 0.0971(18) 0.0804(17) -0.0040(16) -0.0261(16) -0.0208(15) 
O5_12 0.087(4) 0.111(4) 0.132(4) 0.002(4) -0.021(4) -0.041(3) 
O1_13 0.038(4) 0.193(12) 0.117(9) -0.050(9) -0.032(5) -0.005(6) 
O17_14 0.201(13) 0.116(9) 0.108(8) -0.034(7) -0.095(8) -0.038(8) 
O2_15 0.071(6) 0.084(6) 0.071(5) -0.006(4) -0.044(5) -0.005(5) 
O1_16 0.100(8) 0.109(8) 0.193(12) -0.051(8) -0.040(8) -0.065(7) 
O1_17 0.078(7) 0.189(12) 0.071(5) -0.016(7) -0.012(5) -0.075(8) 
O2A_18 0.048(3) 0.094(4) 0.068(3) -0.018(3) -0.010(3) -0.032(3) 
O2B_18 0.048(3) 0.094(4) 0.068(3) -0.018(3) -0.010(3) -0.032(3) 
N_19 0.141(6) 0.120(5) 0.113(5) -0.040(5) -0.046(5) -0.041(5) 
O_19 0.136(6) 0.116(5) 0.107(5) -0.043(5) -0.051(5) -0.043(5) 
C1_19 0.139(6) 0.118(5) 0.110(5) -0.040(5) -0.048(5) -0.042(5) 
C2_19 0.144(7) 0.119(6) 0.112(6) -0.038(5) -0.047(6) -0.041(6) 
C3_19 0.142(7) 0.119(6) 0.117(6) -0.038(6) -0.044(6) -0.041(6) 
C4_19 0.144(7) 0.127(6) 0.116(6) -0.037(6) -0.043(6) -0.036(6) 
N_20 0.077(4) 0.095(4) 0.101(4) -0.008(3) -0.050(3) -0.018(3) 
O_20 0.073(4) 0.092(4) 0.094(4) -0.007(3) -0.054(3) -0.018(3) 
C1_20 0.075(4) 0.094(4) 0.098(4) -0.008(3) -0.053(3) -0.019(3) 
C2_20 0.080(5) 0.097(5) 0.103(5) -0.011(4) -0.051(4) -0.023(4) 
C3_20 0.080(5) 0.097(5) 0.105(5) -0.009(4) -0.050(4) -0.019(4) 
C4_20 0.076(4) 0.099(5) 0.108(5) -0.006(5) -0.045(4) -0.016(4) 
N_21 0.102(5) 0.070(3) 0.190(7) -0.042(4) -0.064(5) -0.012(3) 
O_21 0.095(5) 0.062(3) 0.184(7) -0.043(4) -0.068(5) -0.015(3) 
C1_21 0.098(5) 0.066(3) 0.187(7) -0.044(4) -0.067(5) -0.015(3) 
C2_21 0.099(6) 0.073(5) 0.188(8) -0.045(5) -0.069(5) -0.014(4) 
C3_21 0.102(6) 0.079(5) 0.193(8) -0.036(5) -0.065(5) -0.009(4) 
C4_21 0.107(6) 0.071(5) 0.193(8) -0.044(5) -0.061(6) -0.014(4) 
N_22 0.067(3) 0.049(3) 0.134(5) -0.022(3) -0.057(3) -0.002(2) 
O_22 0.064(3) 0.044(3) 0.130(5) -0.024(3) -0.062(3) -0.002(2) 
C1_22 0.065(3) 0.046(3) 0.131(5) -0.023(3) -0.060(3) -0.002(2) 
C2_22 0.067(4) 0.056(4) 0.132(6) -0.023(4) -0.061(4) 0.006(4) 
C3_22 0.074(5) 0.057(4) 0.133(6) -0.019(4) -0.054(4) 0.000(4) 
C4_22 0.067(4) 0.053(4) 0.140(6) -0.017(4) -0.050(4) 0.003(4) 
N_23 0.071(4) 0.101(4) 0.165(6) -0.030(4) -0.060(4) -0.018(3) 
O_23 0.063(4) 0.094(4) 0.159(6) -0.029(4) -0.062(4) -0.015(3) 
C1_23 0.067(4) 0.097(4) 0.162(6) -0.030(4) -0.061(4) -0.016(3) 
C2_23 0.069(5) 0.099(5) 0.162(7) -0.032(5) -0.065(5) -0.016(4) 
C3_23 0.079(5) 0.110(6) 0.163(7) -0.025(6) -0.060(5) -0.018(4) 
C4_23 0.072(5) 0.100(5) 0.168(7) -0.031(5) -0.060(5) -0.020(4) 
NA_24 0.0515(12) 0.0573(11) 0.1462(12) -0.0226(12) -0.0340(12) -0.0243(11) 
OA_24 0.0508(12) 0.0574(12) 0.1461(13) -0.0227(12) -0.0343(12) -0.0239(11) 
C1A_24 0.0512(11) 0.0574(11) 0.1461(12) -0.0225(11) -0.0342(11) -0.0242(10) 
C2A_24 0.052(2) 0.060(2) 0.1469(19) -0.0208(19) -0.0332(19) -0.0240(19) 
C3A_24 0.0524(19) 0.058(2) 0.1458(18) -0.0226(19) -0.0344(18) -0.0232(18) 
C4A_24 0.051(2) 0.0566(18) 0.146(2) -0.0229(19) -0.034(2) -0.0247(19) 
NB_24 0.0515(12) 0.0573(11) 0.1462(12) -0.0226(12) -0.0340(12) -0.0243(11) 
OB_24 0.0508(12) 0.0574(12) 0.1461(13) -0.0227(12) -0.0343(12) -0.0239(11) 
C1B_24 0.0512(11) 0.0574(11) 0.1461(12) -0.0225(11) -0.0342(11) -0.0242(10) 
C2B_24 0.0524(19) 0.058(2) 0.1458(18) -0.0226(19) -0.0344(18) -0.0232(18) 
C3B_24 0.052(2) 0.060(2) 0.1469(19) -0.0208(19) -0.0332(19) -0.0240(19) 
C4B_24 0.051(2) 0.0566(18) 0.146(2) -0.0229(19) -0.034(2) -0.0247(19) 
N_25 0.203(9) 0.119(7) 0.274(11) -0.032(8) -0.166(8) -0.030(7) 
O_25 0.199(9) 0.121(7) 0.272(12) -0.034(8) -0.168(8) -0.031(7) 
C1_25 0.202(9) 0.119(7) 0.273(11) -0.033(8) -0.166(8) -0.031(7) 
C2_25 0.202(9) 0.118(7) 0.273(12) -0.031(8) -0.165(9) -0.031(7) 
C3_25 0.206(9) 0.122(7) 0.276(12) -0.027(8) -0.162(9) -0.025(7) 
C4_25 0.204(9) 0.121(7) 0.276(12) -0.034(8) -0.166(9) -0.032(7) 
N_26 0.107(6) 0.170(8) 0.156(8) -0.015(7) -0.058(6) -0.026(6) 
O_26 0.106(6) 0.171(9) 0.153(8) -0.016(7) -0.061(7) -0.026(6) 
C1_26 0.106(6) 0.170(8) 0.156(8) -0.015(7) -0.060(6) -0.026(6) 
C2_26 0.104(7) 0.168(9) 0.156(9) -0.016(7) -0.064(7) -0.028(7) 
C3_26 0.110(7) 0.169(9) 0.159(9) -0.013(7) -0.053(7) -0.026(7) 
C4_26 0.108(7) 0.172(9) 0.156(9) -0.015(8) -0.057(7) -0.025(7) 
N_27 0.099(6) 0.129(7) 0.169(8) -0.049(6) -0.043(6) -0.025(5) 
O_27 0.096(6) 0.130(7) 0.167(8) -0.051(6) -0.047(6) -0.027(5) 
C1_27 0.099(6) 0.130(7) 0.168(8) -0.049(6) -0.043(6) -0.025(5) 
C2_27 0.103(7) 0.134(8) 0.168(8) -0.047(7) -0.039(6) -0.021(6) 
C3_27 0.100(7) 0.129(8) 0.168(8) -0.050(7) -0.041(6) -0.026(6) 
C4_27 0.102(7) 0.130(8) 0.172(8) -0.046(7) -0.041(6) -0.021(5) 
  
_geom_special_details 
; 
 All esds (except the esd in the dihedral angle between two l.s. planes) 
 are estimated using the full covariance matrix.  The cell esds are taken 
 into account individually in the estimation of esds in distances, angles 
 and torsion angles; correlations between esds in cell parameters are only 
 used when they are defined by crystal symmetry.  An approximate (isotropic) 
 treatment of cell esds is used for estimating esds involving l.s. planes. 
; 
  
loop_ 
 _geom_bond_atom_site_label_1 
 _geom_bond_atom_site_label_2 
 _geom_bond_distance 
 _geom_bond_site_symmetry_2 
 _geom_bond_publ_flag 
Cu1 O1_3 1.910(11) . ? 
Cu1 O1_1 1.958(10) . ? 
Cu1 O3_8 1.965(9) 2_666 ? 
Cu1 O1_2 1.976(8) . ? 
Cu1 O_19 2.179(9) . ? 
Cu1 Cu2 2.638(3) . ? 
Cu2 O2_2 1.956(9) . ? 
Cu2 O4_8 1.963(9) 2_666 ? 
Cu2 O2_3 1.976(12) . ? 
Cu2 O2_1 1.999(11) . ? 
Cu2 O17_14 2.166(11) . ? 
Cu3 O1_5 1.936(8) . ? 
Cu3 O1_6 1.948(8) . ? 
Cu3 O1_4 1.954(8) . ? 
Cu3 O3_2 1.985(8) . ? 
Cu3 O_20 2.208(9) . ? 
Cu3 Cu4 2.637(2) . ? 
Cu4 O4_2 1.951(8) . ? 
Cu4 O2_4 1.983(8) . ? 
Cu4 O2_5 1.985(8) . ? 
Cu4 O2_6 1.989(8) . ? 
Cu4 O2_15 2.149(9) . ? 
Cu5 O1_8 1.931(9) . ? 
Cu5 O3_4 1.943(9) . ? 
Cu5 O1_7 1.961(7) . ? 
Cu5 O1_9 1.983(8) . ? 
Cu5 O_21 2.141(7) . ? 
Cu5 Cu6 2.635(2) . ? 
Cu6 O2_7 1.954(7) . ? 
Cu6 O2_9 1.957(7) . ? 
Cu6 O2_8 1.961(9) . ? 
Cu6 O4_4 1.977(9) . ? 
Cu6 O_22 2.137(7) . ? 
Cu7 O1_11 1.922(9) . ? 
Cu7 O3_5 1.948(9) . ? 
Cu7 O1_10 1.969(8) . ? 
Cu7 O3_9 1.973(8) . ? 
Cu7 O1_13 2.140(9) . ? 
Cu7 Cu8 2.637(2) . ? 
Cu8 O2_10 1.958(8) . ? 
Cu8 O4_9 1.966(7) . ? 
Cu8 O2_11 1.976(9) . ? 
Cu8 O4_5 1.980(9) . ? 
Cu8 O_23 2.195(8) . ? 
Cu9 O3_11 1.957(8) . ? 
Cu9 O3_3 1.963(11) 2_666 ? 
Cu9 O3_12 1.965(10) . ? 
Cu9 O3_6 1.984(9) 2_666 ? 
Cu9 O1_17 2.209(10) . ? 
Cu9 Cu10 2.635(3) . ? 
Cu10 O4_11 1.949(9) . ? 
Cu10 O4_6 1.961(9) 2_666 ? 
Cu10 O4_12 1.972(11) . ? 
Cu10 O4_3 1.997(12) 2_666 ? 
Cu10 O2A_18 2.201(14) . ? 
Cu10 O2B_18 2.217(15) . ? 
Cu11 O3_10 1.933(8) . ? 
Cu11 O3_7 1.958(8) 2_666 ? 
Cu11 O3_1 1.973(10) . ? 
Cu11 O1_12 1.980(11) . ? 
Cu11 O1_16 2.158(9) . ? 
Cu11 Cu12 2.658(2) . ? 
Cu12 O2_12 1.936(11) . ? 
Cu12 O4_1 1.944(11) . ? 
Cu12 O4_10 1.992(8) . ? 
Cu12 O4_7 1.998(8) 2_666 ? 
Cu12 OA_24 2.16(2) . ? 
Cu12 OB_24 2.16(3) . ? 
O1_1 C1_1 1.264(15) . ? 
O2_1 C1_1 1.223(17) . ? 
O3_1 C8_1 1.304(15) . ? 
O4_1 C8_1 1.226(16) . ? 
C1_1 C2_1 1.53(2) . ? 
C2_1 C7_1 1.36(2) . ? 
C2_1 C3_1 1.389(19) . ? 
C3_1 C4_1 1.37(2) . ? 
C3_1 H3_1 0.9500 . ? 
C4_1 C5_1 1.33(2) . ? 
C4_1 O5_1 1.427(17) . ? 
C5_1 C6_1 1.446(19) . ? 
C5_1 H5_1 0.9500 . ? 
C6_1 C7_1 1.39(2) . ? 
C6_1 C8_1 1.45(2) . ? 
C7_1 H7_1 0.9500 . ? 
O5_1 C9_1 1.49(2) . ? 
C9_1 C10_1 1.54(2) . ? 
C9_1 H9A_1 0.9900 . ? 
C9_1 H9B_1 0.9900 . ? 
C10_1 C11_1 1.48(2) . ? 
C10_1 H10A_1 0.9900 . ? 
C10_1 H10B_1 0.9900 . ? 
C11_1 H11A_1 0.9800 . ? 
C11_1 H11B_1 0.9800 . ? 
C11_1 H11C_1 0.9800 . ? 
O1_2 C1_2 1.280(14) . ? 
O2_2 C1_2 1.256(14) . ? 
O3_2 C8_2 1.250(14) . ? 
O4_2 C8_2 1.246(14) . ? 
C1_2 C2_2 1.494(17) . ? 
C2_2 C7_2 1.388(17) . ? 
C2_2 C3_2 1.409(17) . ? 
C3_2 C4_2 1.372(17) . ? 
C3_2 H3_2 0.9500 . ? 
C4_2 O5_2 1.355(14) . ? 
C4_2 C5_2 1.382(17) . ? 
C5_2 C6_2 1.406(17) . ? 
C5_2 H5_2 0.9500 . ? 
C6_2 C7_2 1.383(17) . ? 
C6_2 C8_2 1.513(17) . ? 
C7_2 H7_2 0.9500 . ? 
O5_2 C9_2 1.438(13) . ? 
C9_2 C10_2 1.483(14) . ? 
C9_2 H9A_2 0.9900 . ? 
C9_2 H9B_2 0.9900 . ? 
C10_2 C11_2 1.541(15) . ? 
C10_2 H10A_2 0.9900 . ? 
C10_2 H10B_2 0.9900 . ? 
C11_2 H11A_2 0.9800 . ? 
C11_2 H11B_2 0.9800 . ? 
C11_2 H11C_2 0.9800 . ? 
O1_3 C1_3 1.250(18) . ? 
O2_3 C1_3 1.330(17) . ? 
O3_3 C8_3 1.245(19) . ? 
O4_3 C8_3 1.29(2) . ? 
C1_3 C2_3 1.48(2) . ? 
C2_3 C3_3 1.3900 . ? 
C2_3 C7_3 1.3900 . ? 
C3_3 C4_3 1.3900 . ? 
C3_3 H3_3 0.9500 . ? 
C4_3 O5_3 1.377(14) . ? 
C4_3 C5_3 1.3900 . ? 
C5_3 C6_3 1.3900 . ? 
C5_3 H5_3 0.9500 . ? 
C6_3 C7_3 1.3900 . ? 
C6_3 C8_3 1.45(2) . ? 
C7_3 H7_3 0.9500 . ? 
O5_3 C9_3 1.466(16) . ? 
C9_3 C10_3 1.476(17) . ? 
C9_3 H9A_3 0.9900 . ? 
C9_3 H9B_3 0.9900 . ? 
C10_3 C11_3 1.566(18) . ? 
C10_3 H10A_3 0.9900 . ? 
C10_3 H10B_3 0.9900 . ? 
C11_3 H11A_3 0.9800 . ? 
C11_3 H11B_3 0.9800 . ? 
C11_3 H11C_3 0.9800 . ? 
O1_4 C1_4 1.260(14) . ? 
O2_4 C1_4 1.249(14) . ? 
O3_4 C8_4 1.275(13) . ? 
O4_4 C8_4 1.243(13) . ? 
C1_4 C2_4 1.546(17) . ? 
C2_4 C3_4 1.356(17) . ? 
C2_4 C7_4 1.412(17) . ? 
C3_4 C4_4 1.403(18) . ? 
C3_4 H3_4 0.9500 . ? 
C4_4 C5_4 1.358(19) . ? 
C4_4 O5_4 1.404(16) . ? 
C5_4 C6_4 1.382(18) . ? 
C5_4 H5_4 0.9500 . ? 
C6_4 C7_4 1.354(16) . ? 
C6_4 C8_4 1.520(18) . ? 
C7_4 H7_4 0.9500 . ? 
O5_4 C9_4 1.535(18) . ? 
O1_5 C1_5 1.245(13) . ? 
O2_5 C1_5 1.247(14) . ? 
O3_5 C8_5 1.253(13) . ? 
O4_5 C8_5 1.244(14) . ? 
C1_5 C2_5 1.495(17) . ? 
C2_5 C7_5 1.373(17) . ? 
C2_5 C3_5 1.408(16) . ? 
C3_5 C4_5 1.371(18) . ? 
C3_5 H3_5 0.9500 . ? 
C4_5 C5_5 1.356(18) . ? 
C4_5 O5_5 1.385(14) . ? 
C5_5 C6_5 1.409(16) . ? 
C5_5 H5_5 0.9500 . ? 
C6_5 C7_5 1.364(16) . ? 
C6_5 C8_5 1.497(18) . ? 
C7_5 H7_5 0.9500 . ? 
O5_5 C9_5 1.451(16) . ? 
C9_5 C10_5 1.529(19) . ? 
C9_5 H9A_5 0.9900 . ? 
C9_5 H9B_5 0.9900 . ? 
O1_6 C1_6 1.239(14) . ? 
O2_6 C1_6 1.264(14) . ? 
O3_6 C8_6 1.250(16) . ? 
O4_6 C8_6 1.283(15) . ? 
C1_6 C2_6 1.530(18) . ? 
C2_6 C7_6 1.374(17) . ? 
C2_6 C3_6 1.394(19) . ? 
C3_6 C4_6 1.361(19) . ? 
C3_6 H3_6 0.9500 . ? 
C4_6 O5_6 1.344(17) . ? 
C4_6 C5_6 1.41(2) . ? 
C5_6 C6_6 1.383(19) . ? 
C5_6 H5_6 0.9500 . ? 
C6_6 C7_6 1.401(18) . ? 
C6_6 C8_6 1.522(18) . ? 
C7_6 H7_6 0.9500 . ? 
O5_6 C9_6 1.507(19) . ? 
C9_6 C10_6 1.49(2) . ? 
C9_6 H9A_6 0.9900 . ? 
C9_6 H9B_6 0.9900 . ? 
C10_6 C11_6 1.61(2) . ? 
C10_6 H10A_6 0.9900 . ? 
C10_6 H10B_6 0.9900 . ? 
C11_6 H11A_6 0.9800 . ? 
C11_6 H11B_6 0.9800 . ? 
C11_6 H11C_6 0.9800 . ? 
O1_7 C1_7 1.234(13) . ? 
O2_7 C1_7 1.282(13) . ? 
O3_7 C8_7 1.248(14) . ? 
O4_7 C8_7 1.299(14) . ? 
C1_7 C2_7 1.524(16) . ? 
C2_7 C7_7 1.357(17) . ? 
C2_7 C3_7 1.396(17) . ? 
C3_7 C4_7 1.379(17) . ? 
C3_7 H3_7 0.9500 . ? 
C4_7 O5_7 1.367(15) . ? 
C4_7 C5_7 1.400(18) . ? 
C5_7 C6_7 1.426(17) . ? 
C5_7 H5_7 0.9500 . ? 
C6_7 C7_7 1.404(16) . ? 
C6_7 C8_7 1.468(17) . ? 
C7_7 H7_7 0.9500 . ? 
O5_7 C9_7 1.376(16) . ? 
C9_7 C10_7 1.52(2) . ? 
C9_7 H9A_7 0.9900 . ? 
C9_7 H9B_7 0.9900 . ? 
C10_7 C11_7 1.37(2) . ? 
C10_7 H10A_7 0.9900 . ? 
C10_7 H10B_7 0.9900 . ? 
C11_7 H11A_7 0.9800 . ? 
C11_7 H11B_7 0.9800 . ? 
C11_7 H11C_7 0.9800 . ? 
O1_8 C1_8 1.277(14) . ? 
O2_8 C1_8 1.269(14) . ? 
O3_8 C8_8 1.243(16) . ? 
O4_8 C8_8 1.261(16) . ? 
C1_8 C2_8 1.481(19) . ? 
C2_8 C3_8 1.380(18) . ? 
C2_8 C7_8 1.405(17) . ? 
C3_8 C4_8 1.38(2) . ? 
C3_8 H3_8 0.9500 . ? 
C4_8 O5_8 1.354(17) . ? 
C4_8 C5_8 1.405(19) . ? 
C5_8 C6_8 1.352(19) . ? 
C5_8 H5_8 0.9500 . ? 
C6_8 C7_8 1.388(19) . ? 
C6_8 C8_8 1.495(18) . ? 
C7_8 H7_8 0.9500 . ? 
O5_8 C9_8 1.434(19) . ? 
C9_8 C10_8 1.55(2) . ? 
C9_8 H9A_8 0.9900 . ? 
C9_8 H9B_8 0.9900 . ? 
C10_8 C11_8 1.58(2) . ? 
C10_8 H10A_8 0.9900 . ? 
C10_8 H10B_8 0.9900 . ? 
C11_8 H11A_8 0.9800 . ? 
C11_8 H11B_8 0.9800 . ? 
C11_8 H11C_8 0.9800 . ? 
O1_9 C1_9 1.217(13) . ? 
O2_9 C1_9 1.270(13) . ? 
O3_9 C8_9 1.216(13) . ? 
O4_9 C8_9 1.299(12) . ? 
C1_9 C2_9 1.508(16) . ? 
C2_9 C7_9 1.404(16) . ? 
C2_9 C3_9 1.415(16) . ? 
C3_9 C4_9 1.411(16) . ? 
C3_9 H3_9 0.9500 . ? 
C4_9 O5_9 1.373(14) . ? 
C4_9 C5_9 1.404(16) . ? 
C5_9 C6_9 1.351(16) . ? 
C5_9 H5_9 0.9500 . ? 
C6_9 C7_9 1.388(16) . ? 
C6_9 C8_9 1.501(16) . ? 
C7_9 H7_9 0.9500 . ? 
O5_9 C9_9 1.454(15) . ? 
C9_9 C10_9 1.522(17) . ? 
C9_9 H9A_9 0.9900 . ? 
C9_9 H9B_9 0.9900 . ? 
C10_9 C11_9 1.558(17) . ? 
C10_9 H10A_9 0.9900 . ? 
C10_9 H10B_9 0.9900 . ? 
C11_9 H11A_9 0.9800 . ? 
C11_9 H11B_9 0.9800 . ? 
C11_9 H11C_9 0.9800 . ? 
O1_10 C1_10 1.246(13) . ? 
O2_10 C1_10 1.282(14) . ? 
O3_10 C8_10 1.228(14) . ? 
O4_10 C8_10 1.277(14) . ? 
C1_10 C2_10 1.526(17) . ? 
C2_10 C7_10 1.351(17) . ? 
C2_10 C3_10 1.385(18) . ? 
C3_10 C4_10 1.364(19) . ? 
C3_10 H3_10 0.9500 . ? 
C4_10 O5_10 1.369(16) . ? 
C4_10 C5_10 1.384(18) . ? 
C5_10 C6_10 1.351(17) . ? 
C5_10 H5_10 0.9500 . ? 
C6_10 C7_10 1.388(18) . ? 
C6_10 C8_10 1.516(17) . ? 
C7_10 H7_10 0.9500 . ? 
O5_10 C9_10 1.216(18) . ? 
O1_11 C1_11 1.209(14) . ? 
O2_11 C1_11 1.279(14) . ? 
O3_11 C8_11 1.232(15) . ? 
O4_11 C8_11 1.271(16) . ? 
C1_11 C2A_11 1.564(18) . ? 
C1_11 C2B_11 1.587(19) . ? 
C2A_11 C3A_11 1.3900 . ? 
C2A_11 C7A_11 1.3900 . ? 
C3A_11 C4A_11 1.3900 . ? 
C3A_11 H3A_11 0.9500 . ? 
C4A_11 O5A_11 1.34(2) . ? 
C4A_11 C5A_11 1.3900 . ? 
C5A_11 C6A_11 1.3900 . ? 
C5A_11 H5A_11 0.9500 . ? 
C6A_11 C7A_11 1.3900 . ? 
C6A_11 C8_11 1.607(18) . ? 
C7A_11 H7A_11 0.9500 . ? 
C2B_11 C3B_11 1.3900 . ? 
C2B_11 C7B_11 1.3900 . ? 
C3B_11 C4B_11 1.3900 . ? 
C3B_11 H3B_11 0.9500 . ? 
C4B_11 C5B_11 1.3900 . ? 
C4B_11 O5B_11 1.39(2) . ? 
C5B_11 C6B_11 1.3900 . ? 
C5B_11 H5B_11 0.9500 . ? 
C6B_11 C7B_11 1.3900 . ? 
C6B_11 C8_11 1.598(17) . ? 
C7B_11 H7B_11 0.9500 . ? 
O5A_11 C9A_11 1.402(17) . ? 
C9A_11 C10A_11 1.489(18) . ? 
C9A_11 H9A1_11 0.9900 . ? 
C9A_11 H9A2_11 0.9900 . ? 
C10A_11 C11A_11 1.52(2) . ? 
C10A_11 H10A_11 0.9900 . ? 
C10A_11 H10B_11 0.9900 . ? 
C11A_11 H11A_11 0.9800 . ? 
C11A_11 H11B_11 0.9800 . ? 
C11A_11 H11C_11 0.9800 . ? 
O5B_11 C9B_11 1.425(17) . ? 
C9B_11 C10B_11 1.468(19) . ? 
C9B_11 H9B1_11 0.9900 . ? 
C9B_11 H9B2_11 0.9900 . ? 
C10B_11 C11B_11 1.52(2) . ? 
C10B_11 H10C_11 0.9900 . ? 
C10B_11 H10D_11 0.9900 . ? 
C11B_11 H11D_11 0.9800 . ? 
C11B_11 H11E_11 0.9800 . ? 
C11B_11 H11F_11 0.9800 . ? 
O1_12 C1_12 1.268(16) . ? 
O2_12 C1_12 1.295(16) . ? 
O3_12 C8_12 1.237(16) . ? 
O4_12 C8_12 1.231(17) . ? 
C1_12 C2_12 1.486(18) . ? 
C2_12 C3_12 1.3900 . ? 
C2_12 C7_12 1.3900 . ? 
C3_12 C4_12 1.3900 . ? 
C3_12 H3_12 0.9500 . ? 
C4_12 C5_12 1.3900 . ? 
C4_12 C8_12 1.534(18) . ? 
C5_12 C6_12 1.3900 . ? 
C5_12 H5_12 0.9500 . ? 
C6_12 O5_12 1.379(13) . ? 
C6_12 C7_12 1.3900 . ? 
C7_12 H7_12 0.9500 . ? 
N_19 C1_19 1.3278 . ? 
N_19 C3_19 1.38(2) . ? 
N_19 C4_19 1.52(2) . ? 
O_19 C1_19 1.2502 . ? 
C1_19 C2_19 1.5087 . ? 
C2_19 H2A_19 0.9800 . ? 
C2_19 H2B_19 0.9800 . ? 
C2_19 H2C_19 0.9800 . ? 
C3_19 H3A_19 0.9800 . ? 
C3_19 H3B_19 0.9800 . ? 
C3_19 H3C_19 0.9800 . ? 
C4_19 H4A_19 0.9800 . ? 
C4_19 H4B_19 0.9800 . ? 
C4_19 H4C_19 0.9800 . ? 
N_20 C1_20 1.3280 . ? 
N_20 C3_20 1.393(18) . ? 
N_20 C4_20 1.487(17) . ? 
O_20 C1_20 1.2502 . ? 
C1_20 C2_20 1.5084 . ? 
C2_20 H2A_20 0.9800 . ? 
C2_20 H2B_20 0.9800 . ? 
C2_20 H2C_20 0.9800 . ? 
C3_20 H3A_20 0.9800 . ? 
C3_20 H3B_20 0.9800 . ? 
C3_20 H3C_20 0.9800 . ? 
C4_20 H4A_20 0.9800 . ? 
C4_20 H4B_20 0.9800 . ? 
C4_20 H4C_20 0.9800 . ? 
N_21 C1_21 1.3280 . ? 
N_21 C3_21 1.40(2) . ? 
N_21 C4_21 1.432(18) . ? 
O_21 C1_21 1.2500 . ? 
C1_21 C2_21 1.5086 . ? 
C2_21 H2A_21 0.9800 . ? 
C2_21 H2B_21 0.9800 . ? 
C2_21 H2C_21 0.9800 . ? 
C3_21 H3A_21 0.9800 . ? 
C3_21 H3B_21 0.9800 . ? 
C3_21 H3C_21 0.9800 . ? 
C4_21 H4A_21 0.9800 . ? 
C4_21 H4B_21 0.9800 . ? 
C4_21 H4C_21 0.9800 . ? 
N_22 C1_22 1.3281 . ? 
N_22 C3_22 1.446(17) . ? 
N_22 C4_22 1.484(15) . ? 
O_22 C1_22 1.2502 . ? 
C1_22 C2_22 1.5084 . ? 
C2_22 H2A_22 0.9800 . ? 
C2_22 H2B_22 0.9800 . ? 
C2_22 H2C_22 0.9800 . ? 
C3_22 H3A_22 0.9800 . ? 
C3_22 H3B_22 0.9800 . ? 
C3_22 H3C_22 0.9800 . ? 
C4_22 H4A_22 0.9800 . ? 
C4_22 H4B_22 0.9800 . ? 
C4_22 H4C_22 0.9800 . ? 
N_23 C1_23 1.3283 . ? 
N_23 C3_23 1.44(2) . ? 
N_23 C4_23 1.499(18) . ? 
O_23 C1_23 1.2499 . ? 
C1_23 C2_23 1.5087 . ? 
C2_23 H2A_23 0.9800 . ? 
C2_23 H2B_23 0.9800 . ? 
C2_23 H2C_23 0.9800 . ? 
C3_23 H3A_23 0.9800 . ? 
C3_23 H3B_23 0.9800 . ? 
C3_23 H3C_23 0.9800 . ? 
C4_23 H4A_23 0.9800 . ? 
C4_23 H4B_23 0.9800 . ? 
C4_23 H4C_23 0.9800 . ? 
NA_24 C3A_24 1.24(3) . ? 
NA_24 C1A_24 1.3280 . ? 
NA_24 C4A_24 1.55(3) . ? 
OA_24 C1A_24 1.2501 . ? 
C1A_24 C2A_24 1.5085 . ? 
C2A_24 H2AA_24 0.9800 . ? 
C2A_24 H2AB_24 0.9800 . ? 
C2A_24 H2AC_24 0.9800 . ? 
C3A_24 H3AA_24 0.9800 . ? 
C3A_24 H3AB_24 0.9800 . ? 
C3A_24 H3AC_24 0.9800 . ? 
C4A_24 H4AA_24 0.9800 . ? 
C4A_24 H4AB_24 0.9800 . ? 
C4A_24 H4AC_24 0.9800 . ? 
NB_24 C1B_24 1.3282 . ? 
NB_24 C4B_24 1.36(4) . ? 
NB_24 C3B_24 1.71(4) . ? 
OB_24 C1B_24 1.2499 . ? 
C1B_24 C2B_24 1.5084 . ? 
C2B_24 H2BA_24 0.9800 . ? 
C2B_24 H2BB_24 0.9800 . ? 
C2B_24 H2BC_24 0.9800 . ? 
C3B_24 H3BA_24 0.9800 . ? 
C3B_24 H3BB_24 0.9800 . ? 
C3B_24 H3BC_24 0.9800 . ? 
C4B_24 H4BA_24 0.9800 . ? 
C4B_24 H4BB_24 0.9800 . ? 
C4B_24 H4BC_24 0.9800 . ? 
N_25 C1_25 1.3283 . ? 
N_25 C4_25 1.41(2) . ? 
N_25 C3_25 1.41(3) . ? 
O_25 C1_25 1.2498 . ? 
C1_25 C2_25 1.5084 . ? 
C2_25 H2A_25 0.9800 . ? 
C2_25 H2B_25 0.9800 . ? 
C2_25 H2C_25 0.9800 . ? 
C3_25 H3A_25 0.9800 . ? 
C3_25 H3B_25 0.9800 . ? 
C3_25 H3C_25 0.9800 . ? 
C4_25 H4A_25 0.9800 . ? 
C4_25 H4B_25 0.9800 . ? 
C4_25 H4C_25 0.9800 . ? 
N_26 C1_26 1.3278 . ? 
N_26 C4_26 1.46(3) . ? 
N_26 C3_26 1.51(3) . ? 
O_26 C1_26 1.2501 . ? 
C1_26 C2_26 1.5086 . ? 
C2_26 H2A_26 0.9800 . ? 
C2_26 H2B_26 0.9800 . ? 
C2_26 H2C_26 0.9800 . ? 
C3_26 H3A_26 0.9800 . ? 
C3_26 H3B_26 0.9800 . ? 
C3_26 H3C_26 0.9800 . ? 
C4_26 H4A_26 0.9800 . ? 
C4_26 H4B_26 0.9800 . ? 
C4_26 H4C_26 0.9800 . ? 
N_27 C1_27 1.3280 . ? 
N_27 C3_27 1.46(2) . ? 
N_27 C4_27 1.48(2) . ? 
O_27 C1_27 1.2501 . ? 
C1_27 C2_27 1.5085 . ? 
C2_27 H2A_27 0.9800 . ? 
C2_27 H2B_27 0.9800 . ? 
C2_27 H2C_27 0.9800 . ? 
C3_27 H3A_27 0.9800 . ? 
C3_27 H3B_27 0.9800 . ? 
C3_27 H3C_27 0.9800 . ? 
C4_27 H4A_27 0.9800 . ? 
C4_27 H4B_27 0.9800 . ? 
C4_27 H4C_27 0.9800 . ? 
  
loop_ 
 _geom_angle_atom_site_label_1 
 _geom_angle_atom_site_label_2 
 _geom_angle_atom_site_label_3 
 _geom_angle 
 _geom_angle_site_symmetry_1 
 _geom_angle_site_symmetry_3 
 _geom_angle_publ_flag 
O1_3 Cu1 O1_1 170.7(4) . . ? 
O1_3 Cu1 O3_8 89.9(4) . 2_666 ? 
O1_1 Cu1 O3_8 89.0(4) . 2_666 ? 
O1_3 Cu1 O1_2 87.7(4) . . ? 
O1_1 Cu1 O1_2 91.0(4) . . ? 
O3_8 Cu1 O1_2 165.2(4) 2_666 . ? 
O1_3 Cu1 O_19 96.1(4) . . ? 
O1_1 Cu1 O_19 93.2(4) . . ? 
O3_8 Cu1 O_19 94.0(4) 2_666 . ? 
O1_2 Cu1 O_19 100.7(4) . . ? 
O1_3 Cu1 Cu2 88.4(3) . . ? 
O1_1 Cu1 Cu2 82.3(3) . . ? 
O3_8 Cu1 Cu2 82.7(3) 2_666 . ? 
O1_2 Cu1 Cu2 82.6(2) . . ? 
O_19 Cu1 Cu2 174.5(3) . . ? 
O2_2 Cu2 O4_8 170.6(4) . 2_666 ? 
O2_2 Cu2 O2_3 87.8(4) . . ? 
O4_8 Cu2 O2_3 88.9(4) 2_666 . ? 
O2_2 Cu2 O2_1 91.0(4) . . ? 
O4_8 Cu2 O2_1 90.2(4) 2_666 . ? 
O2_3 Cu2 O2_1 166.9(4) . . ? 
O2_2 Cu2 O17_14 97.8(4) . . ? 
O4_8 Cu2 O17_14 91.2(4) 2_666 . ? 
O2_3 Cu2 O17_14 94.8(5) . . ? 
O2_1 Cu2 O17_14 98.3(5) . . ? 
O2_2 Cu2 Cu1 86.0(3) . . ? 
O4_8 Cu2 Cu1 84.9(3) 2_666 . ? 
O2_3 Cu2 Cu1 80.9(3) . . ? 
O2_1 Cu2 Cu1 86.0(3) . . ? 
O17_14 Cu2 Cu1 174.2(4) . . ? 
O1_5 Cu3 O1_6 172.1(3) . . ? 
O1_5 Cu3 O1_4 89.7(3) . . ? 
O1_6 Cu3 O1_4 89.3(3) . . ? 
O1_5 Cu3 O3_2 88.7(3) . . ? 
O1_6 Cu3 O3_2 90.4(3) . . ? 
O1_4 Cu3 O3_2 165.7(3) . . ? 
O1_5 Cu3 O_20 98.5(3) . . ? 
O1_6 Cu3 O_20 89.3(3) . . ? 
O1_4 Cu3 O_20 99.7(3) . . ? 
O3_2 Cu3 O_20 94.5(3) . . ? 
O1_5 Cu3 Cu4 85.7(2) . . ? 
O1_6 Cu3 Cu4 86.4(2) . . ? 
O1_4 Cu3 Cu4 84.9(2) . . ? 
O3_2 Cu3 Cu4 80.8(2) . . ? 
O_20 Cu3 Cu4 173.6(2) . . ? 
O4_2 Cu4 O2_4 171.4(3) . . ? 
O4_2 Cu4 O2_5 88.4(3) . . ? 
O2_4 Cu4 O2_5 89.5(3) . . ? 
O4_2 Cu4 O2_6 89.7(3) . . ? 
O2_4 Cu4 O2_6 89.8(3) . . ? 
O2_5 Cu4 O2_6 163.1(3) . . ? 
O4_2 Cu4 O2_15 95.5(4) . . ? 
O2_4 Cu4 O2_15 93.1(4) . . ? 
O2_5 Cu4 O2_15 102.2(3) . . ? 
O2_6 Cu4 O2_15 94.7(4) . . ? 
O4_2 Cu4 Cu3 87.3(2) . . ? 
O2_4 Cu4 Cu3 84.1(2) . . ? 
O2_5 Cu4 Cu3 81.8(2) . . ? 
O2_6 Cu4 Cu3 81.4(2) . . ? 
O2_15 Cu4 Cu3 175.2(3) . . ? 
O1_8 Cu5 O3_4 171.1(3) . . ? 
O1_8 Cu5 O1_7 88.5(3) . . ? 
O3_4 Cu5 O1_7 89.9(3) . . ? 
O1_8 Cu5 O1_9 89.9(3) . . ? 
O3_4 Cu5 O1_9 89.4(3) . . ? 
O1_7 Cu5 O1_9 164.9(3) . . ? 
O1_8 Cu5 O_21 96.5(4) . . ? 
O3_4 Cu5 O_21 92.4(4) . . ? 
O1_7 Cu5 O_21 101.5(3) . . ? 
O1_9 Cu5 O_21 93.6(3) . . ? 
O1_8 Cu5 Cu6 87.3(2) . . ? 
O3_4 Cu5 Cu6 83.8(2) . . ? 
O1_7 Cu5 Cu6 84.1(2) . . ? 
O1_9 Cu5 Cu6 80.8(2) . . ? 
O_21 Cu5 Cu6 173.3(2) . . ? 
O2_7 Cu6 O2_9 171.5(3) . . ? 
O2_7 Cu6 O2_8 90.2(3) . . ? 
O2_9 Cu6 O2_8 87.9(3) . . ? 
O2_7 Cu6 O4_4 90.4(3) . . ? 
O2_9 Cu6 O4_4 89.5(3) . . ? 
O2_8 Cu6 O4_4 166.2(3) . . ? 
O2_7 Cu6 O_22 94.5(3) . . ? 
O2_9 Cu6 O_22 93.9(3) . . ? 
O2_8 Cu6 O_22 95.0(3) . . ? 
O4_4 Cu6 O_22 98.7(3) . . ? 
O2_7 Cu6 Cu5 84.7(2) . . ? 
O2_9 Cu6 Cu5 86.9(2) . . ? 
O2_8 Cu6 Cu5 81.6(2) . . ? 
O4_4 Cu6 Cu5 84.7(2) . . ? 
O_22 Cu6 Cu5 176.5(2) . . ? 
O1_11 Cu7 O3_5 171.1(3) . . ? 
O1_11 Cu7 O1_10 89.5(4) . . ? 
O3_5 Cu7 O1_10 89.8(3) . . ? 
O1_11 Cu7 O3_9 90.1(4) . . ? 
O3_5 Cu7 O3_9 88.4(3) . . ? 
O1_10 Cu7 O3_9 165.6(3) . . ? 
O1_11 Cu7 O1_13 97.9(4) . . ? 
O3_5 Cu7 O1_13 91.0(4) . . ? 
O1_10 Cu7 O1_13 99.7(5) . . ? 
O3_9 Cu7 O1_13 94.6(5) . . ? 
O1_11 Cu7 Cu8 84.4(2) . . ? 
O3_5 Cu7 Cu8 86.7(2) . . ? 
O1_10 Cu7 Cu8 81.7(2) . . ? 
O3_9 Cu7 Cu8 84.0(2) . . ? 
O1_13 Cu7 Cu8 177.3(4) . . ? 
O2_10 Cu8 O4_9 171.5(3) . . ? 
O2_10 Cu8 O2_11 88.2(4) . . ? 
O4_9 Cu8 O2_11 91.3(4) . . ? 
O2_10 Cu8 O4_5 88.5(3) . . ? 
O4_9 Cu8 O4_5 89.9(3) . . ? 
O2_11 Cu8 O4_5 165.1(3) . . ? 
O2_10 Cu8 O_23 91.7(3) . . ? 
O4_9 Cu8 O_23 96.8(3) . . ? 
O2_11 Cu8 O_23 99.7(4) . . ? 
O4_5 Cu8 O_23 94.9(3) . . ? 
O2_10 Cu8 Cu7 87.0(2) . . ? 
O4_9 Cu8 Cu7 84.5(2) . . ? 
O2_11 Cu8 Cu7 83.9(2) . . ? 
O4_5 Cu8 Cu7 81.4(2) . . ? 
O_23 Cu8 Cu7 176.1(3) . . ? 
O3_11 Cu9 O3_3 90.3(4) . 2_666 ? 
O3_11 Cu9 O3_12 89.7(4) . . ? 
O3_3 Cu9 O3_12 168.9(5) 2_666 . ? 
O3_11 Cu9 O3_6 168.3(4) . 2_666 ? 
O3_3 Cu9 O3_6 87.4(4) 2_666 2_666 ? 
O3_12 Cu9 O3_6 90.4(4) . 2_666 ? 
O3_11 Cu9 O1_17 97.9(4) . . ? 
O3_3 Cu9 O1_17 104.1(5) 2_666 . ? 
O3_12 Cu9 O1_17 86.9(4) . . ? 
O3_6 Cu9 O1_17 93.7(4) 2_666 . ? 
O3_11 Cu9 Cu10 83.9(3) . . ? 
O3_3 Cu9 Cu10 88.8(4) 2_666 . ? 
O3_12 Cu9 Cu10 80.1(3) . . ? 
O3_6 Cu9 Cu10 84.6(3) 2_666 . ? 
O1_17 Cu9 Cu10 166.9(4) . . ? 
O4_11 Cu10 O4_6 169.7(4) . 2_666 ? 
O4_11 Cu10 O4_12 89.3(4) . . ? 
O4_6 Cu10 O4_12 89.9(4) 2_666 . ? 
O4_11 Cu10 O4_3 90.1(5) . 2_666 ? 
O4_6 Cu10 O4_3 88.6(4) 2_666 2_666 ? 
O4_12 Cu10 O4_3 168.5(5) . 2_666 ? 
O4_11 Cu10 O2A_18 96.0(5) . . ? 
O4_6 Cu10 O2A_18 93.8(5) 2_666 . ? 
O4_12 Cu10 O2A_18 112.1(5) . . ? 
O4_3 Cu10 O2A_18 79.4(6) 2_666 . ? 
O4_11 Cu10 O2B_18 99.8(6) . . ? 
O4_6 Cu10 O2B_18 90.3(6) 2_666 . ? 
O4_12 Cu10 O2B_18 80.9(6) . . ? 
O4_3 Cu10 O2B_18 110.4(6) 2_666 . ? 
O4_11 Cu10 Cu9 85.0(3) . . ? 
O4_6 Cu10 Cu9 84.7(3) 2_666 . ? 
O4_12 Cu10 Cu9 88.6(3) . . ? 
O4_3 Cu10 Cu9 79.9(4) 2_666 . ? 
O2A_18 Cu10 Cu9 159.3(5) . . ? 
O2B_18 Cu10 Cu9 168.4(5) . . ? 
O3_10 Cu11 O3_7 173.1(3) . 2_666 ? 
O3_10 Cu11 O3_1 90.0(4) . . ? 
O3_7 Cu11 O3_1 87.4(4) 2_666 . ? 
O3_10 Cu11 O1_12 88.7(4) . . ? 
O3_7 Cu11 O1_12 91.7(4) 2_666 . ? 
O3_1 Cu11 O1_12 161.8(3) . . ? 
O3_10 Cu11 O1_16 95.0(4) . . ? 
O3_7 Cu11 O1_16 91.9(4) 2_666 . ? 
O3_1 Cu11 O1_16 107.8(5) . . ? 
O1_12 Cu11 O1_16 90.4(5) . . ? 
O3_10 Cu11 Cu12 83.2(2) . . ? 
O3_7 Cu11 Cu12 90.1(2) 2_666 . ? 
O3_1 Cu11 Cu12 83.8(2) . . ? 
O1_12 Cu11 Cu12 78.0(2) . . ? 
O1_16 Cu11 Cu12 168.3(4) . . ? 
O2_12 Cu12 O4_1 174.9(4) . . ? 
O2_12 Cu12 O4_10 90.0(4) . . ? 
O4_1 Cu12 O4_10 88.8(4) . . ? 
O2_12 Cu12 O4_7 90.1(4) . 2_666 ? 
O4_1 Cu12 O4_7 89.6(4) . 2_666 ? 
O4_10 Cu12 O4_7 163.1(3) . 2_666 ? 
O2_12 Cu12 OA_24 88.1(5) . . ? 
O4_1 Cu12 OA_24 97.0(5) . . ? 
O4_10 Cu12 OA_24 106.0(5) . . ? 
O4_7 Cu12 OA_24 90.9(5) 2_666 . ? 
O2_12 Cu12 OB_24 98.6(6) . . ? 
O4_1 Cu12 OB_24 86.5(6) . . ? 
O4_10 Cu12 OB_24 105.4(6) . . ? 
O4_7 Cu12 OB_24 91.4(6) 2_666 . ? 
O2_12 Cu12 Cu11 90.2(3) . . ? 
O4_1 Cu12 Cu11 84.7(3) . . ? 
O4_10 Cu12 Cu11 84.4(2) . . ? 
O4_7 Cu12 Cu11 78.7(2) 2_666 . ? 
OA_24 Cu12 Cu11 169.5(4) . . ? 
OB_24 Cu12 Cu11 166.8(5) . . ? 
C1_1 O1_1 Cu1 124.0(11) . . ? 
C1_1 O2_1 Cu2 118.5(10) . . ? 
C8_1 O3_1 Cu11 120.5(10) . . ? 
C8_1 O4_1 Cu12 122.2(9) . . ? 
O2_1 C1_1 O1_1 128.8(16) . . ? 
O2_1 C1_1 C2_1 117.0(13) . . ? 
O1_1 C1_1 C2_1 114.0(14) . . ? 
C7_1 C2_1 C3_1 118.5(17) . . ? 
C7_1 C2_1 C1_1 120.4(13) . . ? 
C3_1 C2_1 C1_1 121.1(15) . . ? 
C4_1 C3_1 C2_1 119.0(17) . . ? 
C4_1 C3_1 H3_1 120.5 . . ? 
C2_1 C3_1 H3_1 120.5 . . ? 
C5_1 C4_1 C3_1 123.8(15) . . ? 
C5_1 C4_1 O5_1 121.2(16) . . ? 
C3_1 C4_1 O5_1 114.6(15) . . ? 
C4_1 C5_1 C6_1 118.3(17) . . ? 
C4_1 C5_1 H5_1 120.9 . . ? 
C6_1 C5_1 H5_1 120.9 . . ? 
C7_1 C6_1 C5_1 116.8(16) . . ? 
C7_1 C6_1 C8_1 125.5(13) . . ? 
C5_1 C6_1 C8_1 117.5(15) . . ? 
C2_1 C7_1 C6_1 123.4(14) . . ? 
C2_1 C7_1 H7_1 118.3 . . ? 
C6_1 C7_1 H7_1 118.3 . . ? 
O4_1 C8_1 O3_1 127.7(15) . . ? 
O4_1 C8_1 C6_1 118.9(12) . . ? 
O3_1 C8_1 C6_1 113.4(14) . . ? 
C4_1 O5_1 C9_1 116.9(13) . . ? 
O5_1 C9_1 C10_1 108.1(14) . . ? 
O5_1 C9_1 H9A_1 110.1 . . ? 
C10_1 C9_1 H9A_1 110.1 . . ? 
O5_1 C9_1 H9B_1 110.1 . . ? 
C10_1 C9_1 H9B_1 110.1 . . ? 
H9A_1 C9_1 H9B_1 108.4 . . ? 
C11_1 C10_1 C9_1 109.8(15) . . ? 
C11_1 C10_1 H10A_1 109.7 . . ? 
C9_1 C10_1 H10A_1 109.7 . . ? 
C11_1 C10_1 H10B_1 109.7 . . ? 
C9_1 C10_1 H10B_1 109.7 . . ? 
H10A_1 C10_1 H10B_1 108.2 . . ? 
C10_1 C11_1 H11A_1 109.5 . . ? 
C10_1 C11_1 H11B_1 109.5 . . ? 
H11A_1 C11_1 H11B_1 109.5 . . ? 
C10_1 C11_1 H11C_1 109.5 . . ? 
H11A_1 C11_1 H11C_1 109.5 . . ? 
H11B_1 C11_1 H11C_1 109.5 . . ? 
C1_2 O1_2 Cu1 124.1(8) . . ? 
C1_2 O2_2 Cu2 121.6(8) . . ? 
C8_2 O3_2 Cu3 125.0(8) . . ? 
C8_2 O4_2 Cu4 119.4(8) . . ? 
O2_2 C1_2 O1_2 125.2(12) . . ? 
O2_2 C1_2 C2_2 119.2(11) . . ? 
O1_2 C1_2 C2_2 115.7(11) . . ? 
C7_2 C2_2 C3_2 120.1(12) . . ? 
C7_2 C2_2 C1_2 120.6(11) . . ? 
C3_2 C2_2 C1_2 119.2(11) . . ? 
C4_2 C3_2 C2_2 119.0(12) . . ? 
C4_2 C3_2 H3_2 120.5 . . ? 
C2_2 C3_2 H3_2 120.5 . . ? 
O5_2 C4_2 C3_2 124.5(12) . . ? 
O5_2 C4_2 C5_2 114.4(11) . . ? 
C3_2 C4_2 C5_2 121.1(12) . . ? 
C4_2 C5_2 C6_2 120.4(12) . . ? 
C4_2 C5_2 H5_2 119.8 . . ? 
C6_2 C5_2 H5_2 119.8 . . ? 
C7_2 C6_2 C5_2 118.7(12) . . ? 
C7_2 C6_2 C8_2 119.1(11) . . ? 
C5_2 C6_2 C8_2 122.2(11) . . ? 
C6_2 C7_2 C2_2 120.6(12) . . ? 
C6_2 C7_2 H7_2 119.7 . . ? 
C2_2 C7_2 H7_2 119.7 . . ? 
O4_2 C8_2 O3_2 126.9(11) . . ? 
O4_2 C8_2 C6_2 118.2(11) . . ? 
O3_2 C8_2 C6_2 114.8(11) . . ? 
C4_2 O5_2 C9_2 117.9(10) . . ? 
O5_2 C9_2 C10_2 108.6(10) . . ? 
O5_2 C9_2 H9A_2 110.0 . . ? 
C10_2 C9_2 H9A_2 110.0 . . ? 
O5_2 C9_2 H9B_2 110.0 . . ? 
C10_2 C9_2 H9B_2 110.0 . . ? 
H9A_2 C9_2 H9B_2 108.3 . . ? 
C9_2 C10_2 C11_2 109.5(10) . . ? 
C9_2 C10_2 H10A_2 109.8 . . ? 
C11_2 C10_2 H10A_2 109.8 . . ? 
C9_2 C10_2 H10B_2 109.8 . . ? 
C11_2 C10_2 H10B_2 109.8 . . ? 
H10A_2 C10_2 H10B_2 108.2 . . ? 
C10_2 C11_2 H11A_2 109.5 . . ? 
C10_2 C11_2 H11B_2 109.5 . . ? 
H11A_2 C11_2 H11B_2 109.5 . . ? 
C10_2 C11_2 H11C_2 109.5 . . ? 
H11A_2 C11_2 H11C_2 109.5 . . ? 
H11B_2 C11_2 H11C_2 109.5 . . ? 
C1_3 O1_3 Cu1 121.6(10) . . ? 
C1_3 O2_3 Cu2 125.1(11) . . ? 
C8_3 O3_3 Cu9 119.1(13) . 2_666 ? 
C8_3 O4_3 Cu10 126.7(11) . 2_666 ? 
O1_3 C1_3 O2_3 123.7(17) . . ? 
O1_3 C1_3 C2_3 120.0(13) . . ? 
O2_3 C1_3 C2_3 116.3(14) . . ? 
C3_3 C2_3 C7_3 120.0 . . ? 
C3_3 C2_3 C1_3 116.7(10) . . ? 
C7_3 C2_3 C1_3 123.1(10) . . ? 
C2_3 C3_3 C4_3 120.0 . . ? 
C2_3 C3_3 H3_3 120.0 . . ? 
C4_3 C3_3 H3_3 120.0 . . ? 
O5_3 C4_3 C5_3 117.1(11) . . ? 
O5_3 C4_3 C3_3 122.4(11) . . ? 
C5_3 C4_3 C3_3 120.0 . . ? 
C4_3 C5_3 C6_3 120.0 . . ? 
C4_3 C5_3 H5_3 120.0 . . ? 
C6_3 C5_3 H5_3 120.0 . . ? 
C7_3 C6_3 C5_3 120.0 . . ? 
C7_3 C6_3 C8_3 118.3(12) . . ? 
C5_3 C6_3 C8_3 121.7(12) . . ? 
C6_3 C7_3 C2_3 120.0 . . ? 
C6_3 C7_3 H7_3 120.0 . . ? 
C2_3 C7_3 H7_3 120.0 . . ? 
O3_3 C8_3 O4_3 124.9(17) . . ? 
O3_3 C8_3 C6_3 121.0(18) . . ? 
O4_3 C8_3 C6_3 114.0(15) . . ? 
C4_3 O5_3 C9_3 122.7(14) . . ? 
O5_3 C9_3 C10_3 116.9(16) . . ? 
O5_3 C9_3 H9A_3 108.1 . . ? 
C10_3 C9_3 H9A_3 108.1 . . ? 
O5_3 C9_3 H9B_3 108.1 . . ? 
C10_3 C9_3 H9B_3 108.1 . . ? 
H9A_3 C9_3 H9B_3 107.3 . . ? 
C9_3 C10_3 C11_3 114.8(16) . . ? 
C9_3 C10_3 H10A_3 108.6 . . ? 
C11_3 C10_3 H10A_3 108.6 . . ? 
C9_3 C10_3 H10B_3 108.6 . . ? 
C11_3 C10_3 H10B_3 108.6 . . ? 
H10A_3 C10_3 H10B_3 107.5 . . ? 
C10_3 C11_3 H11A_3 109.5 . . ? 
C10_3 C11_3 H11B_3 109.5 . . ? 
H11A_3 C11_3 H11B_3 109.5 . . ? 
C10_3 C11_3 H11C_3 109.5 . . ? 
H11A_3 C11_3 H11C_3 109.5 . . ? 
H11B_3 C11_3 H11C_3 109.5 . . ? 
C1_4 O1_4 Cu3 120.5(7) . . ? 
C1_4 O2_4 Cu4 120.6(8) . . ? 
C8_4 O3_4 Cu5 123.5(8) . . ? 
C8_4 O4_4 Cu6 121.4(8) . . ? 
O2_4 C1_4 O1_4 129.2(11) . . ? 
O2_4 C1_4 C2_4 113.2(11) . . ? 
O1_4 C1_4 C2_4 117.6(10) . . ? 
C3_4 C2_4 C7_4 120.7(12) . . ? 
C3_4 C2_4 C1_4 121.7(12) . . ? 
C7_4 C2_4 C1_4 117.6(11) . . ? 
C2_4 C3_4 C4_4 118.1(13) . . ? 
C2_4 C3_4 H3_4 120.9 . . ? 
C4_4 C3_4 H3_4 120.9 . . ? 
C5_4 C4_4 C3_4 122.0(13) . . ? 
C5_4 C4_4 O5_4 121.6(12) . . ? 
C3_4 C4_4 O5_4 116.4(12) . . ? 
C4_4 C5_4 C6_4 118.5(13) . . ? 
C4_4 C5_4 H5_4 120.7 . . ? 
C6_4 C5_4 H5_4 120.7 . . ? 
C7_4 C6_4 C5_4 121.4(13) . . ? 
C7_4 C6_4 C8_4 119.3(11) . . ? 
C5_4 C6_4 C8_4 119.3(11) . . ? 
C6_4 C7_4 C2_4 119.2(12) . . ? 
C6_4 C7_4 H7_4 120.4 . . ? 
C2_4 C7_4 H7_4 120.4 . . ? 
O4_4 C8_4 O3_4 125.9(12) . . ? 
O4_4 C8_4 C6_4 118.3(11) . . ? 
O3_4 C8_4 C6_4 115.7(10) . . ? 
C4_4 O5_4 C9_4 117.0(11) . . ? 
C1_5 O1_5 Cu3 122.2(9) . . ? 
C1_5 O2_5 Cu4 124.5(7) . . ? 
C8_5 O3_5 Cu7 120.2(8) . . ? 
C8_5 O4_5 Cu8 125.1(8) . . ? 
O1_5 C1_5 O2_5 125.4(12) . . ? 
O1_5 C1_5 C2_5 116.4(12) . . ? 
O2_5 C1_5 C2_5 118.2(10) . . ? 
C7_5 C2_5 C3_5 118.6(12) . . ? 
C7_5 C2_5 C1_5 120.8(10) . . ? 
C3_5 C2_5 C1_5 120.5(12) . . ? 
C4_5 C3_5 C2_5 119.0(13) . . ? 
C4_5 C3_5 H3_5 120.5 . . ? 
C2_5 C3_5 H3_5 120.5 . . ? 
C5_5 C4_5 C3_5 122.5(11) . . ? 
C5_5 C4_5 O5_5 124.0(12) . . ? 
C3_5 C4_5 O5_5 113.3(12) . . ? 
C4_5 C5_5 C6_5 118.1(12) . . ? 
C4_5 C5_5 H5_5 120.9 . . ? 
C6_5 C5_5 H5_5 120.9 . . ? 
C7_5 C6_5 C5_5 119.9(12) . . ? 
C7_5 C6_5 C8_5 121.1(10) . . ? 
C5_5 C6_5 C8_5 119.0(11) . . ? 
C6_5 C7_5 C2_5 121.6(11) . . ? 
C6_5 C7_5 H7_5 119.2 . . ? 
C2_5 C7_5 H7_5 119.2 . . ? 
O4_5 C8_5 O3_5 126.5(12) . . ? 
O4_5 C8_5 C6_5 117.9(10) . . ? 
O3_5 C8_5 C6_5 115.6(11) . . ? 
C4_5 O5_5 C9_5 116.4(11) . . ? 
O5_5 C9_5 C10_5 106.2(12) . . ? 
O5_5 C9_5 H9A_5 110.5 . . ? 
C10_5 C9_5 H9A_5 110.5 . . ? 
O5_5 C9_5 H9B_5 110.5 . . ? 
C10_5 C9_5 H9B_5 110.5 . . ? 
H9A_5 C9_5 H9B_5 108.7 . . ? 
C1_6 O1_6 Cu3 122.0(8) . . ? 
C1_6 O2_6 Cu4 125.3(9) . . ? 
C8_6 O3_6 Cu9 121.6(8) . 2_666 ? 
C8_6 O4_6 Cu10 121.9(9) . 2_666 ? 
O1_6 C1_6 O2_6 124.8(12) . . ? 
O1_6 C1_6 C2_6 117.6(10) . . ? 
O2_6 C1_6 C2_6 117.5(12) . . ? 
C7_6 C2_6 C3_6 123.3(13) . . ? 
C7_6 C2_6 C1_6 117.3(12) . . ? 
C3_6 C2_6 C1_6 119.4(11) . . ? 
C4_6 C3_6 C2_6 118.9(13) . . ? 
C4_6 C3_6 H3_6 120.6 . . ? 
C2_6 C3_6 H3_6 120.6 . . ? 
O5_6 C4_6 C3_6 117.8(13) . . ? 
O5_6 C4_6 C5_6 122.3(14) . . ? 
C3_6 C4_6 C5_6 119.9(14) . . ? 
C6_6 C5_6 C4_6 119.4(14) . . ? 
C6_6 C5_6 H5_6 120.3 . . ? 
C4_6 C5_6 H5_6 120.3 . . ? 
C5_6 C6_6 C7_6 121.4(12) . . ? 
C5_6 C6_6 C8_6 119.3(13) . . ? 
C7_6 C6_6 C8_6 119.1(13) . . ? 
C2_6 C7_6 C6_6 116.7(13) . . ? 
C2_6 C7_6 H7_6 121.7 . . ? 
C6_6 C7_6 H7_6 121.7 . . ? 
O3_6 C8_6 O4_6 127.1(12) . . ? 
O3_6 C8_6 C6_6 117.7(12) . . ? 
O4_6 C8_6 C6_6 115.0(12) . . ? 
C4_6 O5_6 C9_6 119.9(12) . . ? 
C10_6 C9_6 O5_6 105.3(13) . . ? 
C10_6 C9_6 H9A_6 110.7 . . ? 
O5_6 C9_6 H9A_6 110.7 . . ? 
C10_6 C9_6 H9B_6 110.7 . . ? 
O5_6 C9_6 H9B_6 110.7 . . ? 
H9A_6 C9_6 H9B_6 108.8 . . ? 
C9_6 C10_6 C11_6 104.5(15) . . ? 
C9_6 C10_6 H10A_6 110.9 . . ? 
C11_6 C10_6 H10A_6 110.9 . . ? 
C9_6 C10_6 H10B_6 110.9 . . ? 
C11_6 C10_6 H10B_6 110.9 . . ? 
H10A_6 C10_6 H10B_6 108.9 . . ? 
C10_6 C11_6 H11A_6 109.5 . . ? 
C10_6 C11_6 H11B_6 109.5 . . ? 
H11A_6 C11_6 H11B_6 109.5 . . ? 
C10_6 C11_6 H11C_6 109.5 . . ? 
H11A_6 C11_6 H11C_6 109.5 . . ? 
H11B_6 C11_6 H11C_6 109.5 . . ? 
C1_7 O1_7 Cu5 122.7(7) . . ? 
C1_7 O2_7 Cu6 121.3(7) . . ? 
C8_7 O3_7 Cu11 116.9(8) . 2_666 ? 
C8_7 O4_7 Cu12 127.3(7) . 2_666 ? 
O1_7 C1_7 O2_7 127.1(11) . . ? 
O1_7 C1_7 C2_7 117.9(10) . . ? 
O2_7 C1_7 C2_7 114.9(9) . . ? 
C7_7 C2_7 C3_7 120.1(11) . . ? 
C7_7 C2_7 C1_7 119.4(10) . . ? 
C3_7 C2_7 C1_7 120.5(10) . . ? 
C4_7 C3_7 C2_7 120.7(12) . . ? 
C4_7 C3_7 H3_7 119.7 . . ? 
C2_7 C3_7 H3_7 119.7 . . ? 
O5_7 C4_7 C3_7 130.4(12) . . ? 
O5_7 C4_7 C5_7 109.5(11) . . ? 
C3_7 C4_7 C5_7 120.1(12) . . ? 
C4_7 C5_7 C6_7 119.2(12) . . ? 
C4_7 C5_7 H5_7 120.4 . . ? 
C6_7 C5_7 H5_7 120.4 . . ? 
C7_7 C6_7 C5_7 118.6(11) . . ? 
C7_7 C6_7 C8_7 122.8(11) . . ? 
C5_7 C6_7 C8_7 118.4(11) . . ? 
C2_7 C7_7 C6_7 121.4(11) . . ? 
C2_7 C7_7 H7_7 119.3 . . ? 
C6_7 C7_7 H7_7 119.3 . . ? 
O3_7 C8_7 O4_7 126.3(11) . . ? 
O3_7 C8_7 C6_7 117.5(11) . . ? 
O4_7 C8_7 C6_7 116.0(10) . . ? 
C4_7 O5_7 C9_7 114.5(11) . . ? 
O5_7 C9_7 C10_7 103.9(12) . . ? 
O5_7 C9_7 H9A_7 111.0 . . ? 
C10_7 C9_7 H9A_7 111.0 . . ? 
O5_7 C9_7 H9B_7 111.0 . . ? 
C10_7 C9_7 H9B_7 111.0 . . ? 
H9A_7 C9_7 H9B_7 109.0 . . ? 
C11_7 C10_7 C9_7 122.8(17) . . ? 
C11_7 C10_7 H10A_7 106.6 . . ? 
C9_7 C10_7 H10A_7 106.6 . . ? 
C11_7 C10_7 H10B_7 106.6 . . ? 
C9_7 C10_7 H10B_7 106.6 . . ? 
H10A_7 C10_7 H10B_7 106.6 . . ? 
C10_7 C11_7 H11A_7 109.5 . . ? 
C10_7 C11_7 H11B_7 109.5 . . ? 
H11A_7 C11_7 H11B_7 109.5 . . ? 
C10_7 C11_7 H11C_7 109.5 . . ? 
H11A_7 C11_7 H11C_7 109.5 . . ? 
H11B_7 C11_7 H11C_7 109.5 . . ? 
C1_8 O1_8 Cu5 120.2(8) . . ? 
C1_8 O2_8 Cu6 125.5(8) . . ? 
C8_8 O3_8 Cu1 124.9(9) . 2_666 ? 
C8_8 O4_8 Cu2 122.2(9) . 2_666 ? 
O2_8 C1_8 O1_8 125.2(12) . . ? 
O2_8 C1_8 C2_8 116.5(11) . . ? 
O1_8 C1_8 C2_8 118.0(11) . . ? 
C3_8 C2_8 C7_8 118.6(13) . . ? 
C3_8 C2_8 C1_8 120.7(12) . . ? 
C7_8 C2_8 C1_8 120.6(12) . . ? 
C2_8 C3_8 C4_8 121.5(13) . . ? 
C2_8 C3_8 H3_8 119.2 . . ? 
C4_8 C3_8 H3_8 119.2 . . ? 
O5_8 C4_8 C3_8 116.7(13) . . ? 
O5_8 C4_8 C5_8 125.1(14) . . ? 
C3_8 C4_8 C5_8 118.2(14) . . ? 
C6_8 C5_8 C4_8 121.6(14) . . ? 
C6_8 C5_8 H5_8 119.2 . . ? 
C4_8 C5_8 H5_8 119.2 . . ? 
C5_8 C6_8 C7_8 119.8(13) . . ? 
C5_8 C6_8 C8_8 121.6(13) . . ? 
C7_8 C6_8 C8_8 118.6(13) . . ? 
C6_8 C7_8 C2_8 120.2(13) . . ? 
C6_8 C7_8 H7_8 119.9 . . ? 
C2_8 C7_8 H7_8 119.9 . . ? 
O3_8 C8_8 O4_8 124.8(13) . . ? 
O3_8 C8_8 C6_8 119.4(13) . . ? 
O4_8 C8_8 C6_8 115.7(12) . . ? 
C4_8 O5_8 C9_8 117.3(11) . . ? 
O5_8 C9_8 C10_8 105.6(13) . . ? 
O5_8 C9_8 H9A_8 110.6 . . ? 
C10_8 C9_8 H9A_8 110.6 . . ? 
O5_8 C9_8 H9B_8 110.6 . . ? 
C10_8 C9_8 H9B_8 110.6 . . ? 
H9A_8 C9_8 H9B_8 108.8 . . ? 
C9_8 C10_8 C11_8 102.7(14) . . ? 
C9_8 C10_8 H10A_8 111.2 . . ? 
C11_8 C10_8 H10A_8 111.2 . . ? 
C9_8 C10_8 H10B_8 111.2 . . ? 
C11_8 C10_8 H10B_8 111.2 . . ? 
H10A_8 C10_8 H10B_8 109.1 . . ? 
C10_8 C11_8 H11A_8 109.5 . . ? 
C10_8 C11_8 H11B_8 109.5 . . ? 
H11A_8 C11_8 H11B_8 109.5 . . ? 
C10_8 C11_8 H11C_8 109.5 . . ? 
H11A_8 C11_8 H11C_8 109.5 . . ? 
H11B_8 C11_8 H11C_8 109.5 . . ? 
C1_9 O1_9 Cu5 126.9(7) . . ? 
C1_9 O2_9 Cu6 119.8(7) . . ? 
C8_9 O3_9 Cu7 123.8(7) . . ? 
C8_9 O4_9 Cu8 121.6(7) . . ? 
O1_9 C1_9 O2_9 125.6(11) . . ? 
O1_9 C1_9 C2_9 117.4(10) . . ? 
O2_9 C1_9 C2_9 117.0(9) . . ? 
C7_9 C2_9 C3_9 120.6(11) . . ? 
C7_9 C2_9 C1_9 119.1(10) . . ? 
C3_9 C2_9 C1_9 120.3(10) . . ? 
C4_9 C3_9 C2_9 117.8(10) . . ? 
C4_9 C3_9 H3_9 121.1 . . ? 
C2_9 C3_9 H3_9 121.1 . . ? 
O5_9 C4_9 C5_9 115.1(11) . . ? 
O5_9 C4_9 C3_9 125.1(10) . . ? 
C5_9 C4_9 C3_9 119.8(11) . . ? 
C6_9 C5_9 C4_9 121.5(12) . . ? 
C6_9 C5_9 H5_9 119.3 . . ? 
C4_9 C5_9 H5_9 119.3 . . ? 
C5_9 C6_9 C7_9 120.6(11) . . ? 
C5_9 C6_9 C8_9 122.4(11) . . ? 
C7_9 C6_9 C8_9 116.8(10) . . ? 
C6_9 C7_9 C2_9 119.5(10) . . ? 
C6_9 C7_9 H7_9 120.2 . . ? 
C2_9 C7_9 H7_9 120.2 . . ? 
O3_9 C8_9 O4_9 126.0(10) . . ? 
O3_9 C8_9 C6_9 119.5(10) . . ? 
O4_9 C8_9 C6_9 114.5(9) . . ? 
C4_9 O5_9 C9_9 117.3(9) . . ? 
O5_9 C9_9 C10_9 105.0(10) . . ? 
O5_9 C9_9 H9A_9 110.8 . . ? 
C10_9 C9_9 H9A_9 110.8 . . ? 
O5_9 C9_9 H9B_9 110.8 . . ? 
C10_9 C9_9 H9B_9 110.8 . . ? 
H9A_9 C9_9 H9B_9 108.8 . . ? 
C9_9 C10_9 C11_9 108.5(11) . . ? 
C9_9 C10_9 H10A_9 110.0 . . ? 
C11_9 C10_9 H10A_9 110.0 . . ? 
C9_9 C10_9 H10B_9 110.0 . . ? 
C11_9 C10_9 H10B_9 110.0 . . ? 
H10A_9 C10_9 H10B_9 108.4 . . ? 
C10_9 C11_9 H11A_9 109.5 . . ? 
C10_9 C11_9 H11B_9 109.5 . . ? 
H11A_9 C11_9 H11B_9 109.5 . . ? 
C10_9 C11_9 H11C_9 109.5 . . ? 
H11A_9 C11_9 H11C_9 109.5 . . ? 
H11B_9 C11_9 H11C_9 109.5 . . ? 
C1_10 O1_10 Cu7 126.1(7) . . ? 
C1_10 O2_10 Cu8 119.7(8) . . ? 
C8_10 O3_10 Cu11 125.4(8) . . ? 
C8_10 O4_10 Cu12 120.0(8) . . ? 
O1_10 C1_10 O2_10 125.5(11) . . ? 
O1_10 C1_10 C2_10 117.9(10) . . ? 
O2_10 C1_10 C2_10 116.4(11) . . ? 
C7_10 C2_10 C3_10 120.0(12) . . ? 
C7_10 C2_10 C1_10 119.5(12) . . ? 
C3_10 C2_10 C1_10 120.5(11) . . ? 
C4_10 C3_10 C2_10 119.2(12) . . ? 
C4_10 C3_10 H3_10 120.4 . . ? 
C2_10 C3_10 H3_10 120.4 . . ? 
C3_10 C4_10 O5_10 119.4(12) . . ? 
C3_10 C4_10 C5_10 120.6(14) . . ? 
O5_10 C4_10 C5_10 119.9(12) . . ? 
C6_10 C5_10 C4_10 119.7(13) . . ? 
C6_10 C5_10 H5_10 120.1 . . ? 
C4_10 C5_10 H5_10 120.1 . . ? 
C5_10 C6_10 C7_10 119.8(12) . . ? 
C5_10 C6_10 C8_10 121.6(11) . . ? 
C7_10 C6_10 C8_10 118.5(12) . . ? 
C2_10 C7_10 C6_10 120.5(13) . . ? 
C2_10 C7_10 H7_10 119.7 . . ? 
C6_10 C7_10 H7_10 119.7 . . ? 
O3_10 C8_10 O4_10 126.6(11) . . ? 
O3_10 C8_10 C6_10 119.6(11) . . ? 
O4_10 C8_10 C6_10 113.7(11) . . ? 
C9_10 O5_10 C4_10 128.0(13) . . ? 
C1_11 O1_11 Cu7 123.4(8) . . ? 
C1_11 O2_11 Cu8 119.7(9) . . ? 
C8_11 O3_11 Cu9 121.4(9) . . ? 
C8_11 O4_11 Cu10 119.9(8) . . ? 
O1_11 C1_11 O2_11 128.5(13) . . ? 
O1_11 C1_11 C2A_11 112.9(11) . . ? 
O2_11 C1_11 C2A_11 117.3(12) . . ? 
O1_11 C1_11 C2B_11 119.5(11) . . ? 
O2_11 C1_11 C2B_11 109.5(12) . . ? 
C3A_11 C2A_11 C7A_11 120.0 . . ? 
C3A_11 C2A_11 C1_11 121.9(11) . . ? 
C7A_11 C2A_11 C1_11 117.4(11) . . ? 
C2A_11 C3A_11 C4A_11 120.0 . . ? 
C2A_11 C3A_11 H3A_11 120.0 . . ? 
C4A_11 C3A_11 H3A_11 120.0 . . ? 
O5A_11 C4A_11 C5A_11 123.7(13) . . ? 
O5A_11 C4A_11 C3A_11 116.3(13) . . ? 
C5A_11 C4A_11 C3A_11 120.0 . . ? 
C4A_11 C5A_11 C6A_11 120.0 . . ? 
C4A_11 C5A_11 H5A_11 120.0 . . ? 
C6A_11 C5A_11 H5A_11 120.0 . . ? 
C7A_11 C6A_11 C5A_11 120.0 . . ? 
C7A_11 C6A_11 C8_11 115.8(12) . . ? 
C5A_11 C6A_11 C8_11 122.6(11) . . ? 
C6A_11 C7A_11 C2A_11 120.0 . . ? 
C6A_11 C7A_11 H7A_11 120.0 . . ? 
C2A_11 C7A_11 H7A_11 120.0 . . ? 
C3B_11 C2B_11 C7B_11 120.0 . . ? 
C3B_11 C2B_11 C1_11 124.1(11) . . ? 
C7B_11 C2B_11 C1_11 115.7(11) . . ? 
C2B_11 C3B_11 C4B_11 120.0 . . ? 
C2B_11 C3B_11 H3B_11 120.0 . . ? 
C4B_11 C3B_11 H3B_11 120.0 . . ? 
C5B_11 C4B_11 C3B_11 120.0 . . ? 
C5B_11 C4B_11 O5B_11 124.8(13) . . ? 
C3B_11 C4B_11 O5B_11 115.2(13) . . ? 
C4B_11 C5B_11 C6B_11 120.0 . . ? 
C4B_11 C5B_11 H5B_11 120.0 . . ? 
C6B_11 C5B_11 H5B_11 120.0 . . ? 
C7B_11 C6B_11 C5B_11 120.0 . . ? 
C7B_11 C6B_11 C8_11 115.2(12) . . ? 
C5B_11 C6B_11 C8_11 124.5(12) . . ? 
C6B_11 C7B_11 C2B_11 120.0 . . ? 
C6B_11 C7B_11 H7B_11 120.0 . . ? 
C2B_11 C7B_11 H7B_11 120.0 . . ? 
O3_11 C8_11 O4_11 128.9(12) . . ? 
O3_11 C8_11 C6B_11 118.9(13) . . ? 
O4_11 C8_11 C6B_11 111.8(12) . . ? 
O3_11 C8_11 C6A_11 110.6(13) . . ? 
O4_11 C8_11 C6A_11 114.4(12) . . ? 
C4A_11 O5A_11 C9A_11 118.8(16) . . ? 
O5A_11 C9A_11 C10A_11 107.6(17) . . ? 
O5A_11 C9A_11 H9A1_11 110.2 . . ? 
C10A_11 C9A_11 H9A1_11 110.2 . . ? 
O5A_11 C9A_11 H9A2_11 110.2 . . ? 
C10A_11 C9A_11 H9A2_11 110.2 . . ? 
H9A1_11 C9A_11 H9A2_11 108.5 . . ? 
C9A_11 C10A_11 C11A_11 107.3(18) . . ? 
C9A_11 C10A_11 H10A_11 110.3 . . ? 
C11A_11 C10A_11 H10A_11 110.2 . . ? 
C9A_11 C10A_11 H10B_11 110.3 . . ? 
C11A_11 C10A_11 H10B_11 110.2 . . ? 
H10A_11 C10A_11 H10B_11 108.5 . . ? 
C10A_11 C11A_11 H11A_11 109.5 . . ? 
C10A_11 C11A_11 H11B_11 109.5 . . ? 
H11A_11 C11A_11 H11B_11 109.5 . . ? 
C10A_11 C11A_11 H11C_11 109.5 . . ? 
H11A_11 C11A_11 H11C_11 109.5 . . ? 
H11B_11 C11A_11 H11C_11 109.5 . . ? 
C4B_11 O5B_11 C9B_11 118.2(16) . . ? 
O5B_11 C9B_11 C10B_11 116.0(18) . . ? 
O5B_11 C9B_11 H9B1_11 108.3 . . ? 
C10B_11 C9B_11 H9B1_11 108.3 . . ? 
O5B_11 C9B_11 H9B2_11 108.3 . . ? 
C10B_11 C9B_11 H9B2_11 108.3 . . ? 
H9B1_11 C9B_11 H9B2_11 107.4 . . ? 
C9B_11 C10B_11 C11B_11 112.8(19) . . ? 
C9B_11 C10B_11 H10C_11 109.0 . . ? 
C11B_11 C10B_11 H10C_11 109.0 . . ? 
C9B_11 C10B_11 H10D_11 109.0 . . ? 
C11B_11 C10B_11 H10D_11 109.0 . . ? 
H10C_11 C10B_11 H10D_11 107.8 . . ? 
C10B_11 C11B_11 H11D_11 109.5 . . ? 
C10B_11 C11B_11 H11E_11 109.5 . . ? 
H11D_11 C11B_11 H11E_11 109.5 . . ? 
C10B_11 C11B_11 H11F_11 109.5 . . ? 
H11D_11 C11B_11 H11F_11 109.5 . . ? 
H11E_11 C11B_11 H11F_11 109.5 . . ? 
C1_12 O1_12 Cu11 130.4(9) . . ? 
C1_12 O2_12 Cu12 117.5(10) . . ? 
C8_12 O3_12 Cu9 124.7(10) . . ? 
C8_12 O4_12 Cu10 114.5(11) . . ? 
O1_12 C1_12 O2_12 123.6(15) . . ? 
O1_12 C1_12 C2_12 117.4(12) . . ? 
O2_12 C1_12 C2_12 119.0(13) . . ? 
C3_12 C2_12 C7_12 120.0 . . ? 
C3_12 C2_12 C1_12 118.4(9) . . ? 
C7_12 C2_12 C1_12 121.4(9) . . ? 
C4_12 C3_12 C2_12 120.0 . . ? 
C4_12 C3_12 H3_12 120.0 . . ? 
C2_12 C3_12 H3_12 120.0 . . ? 
C3_12 C4_12 C5_12 120.0 . . ? 
C3_12 C4_12 C8_12 118.1(9) . . ? 
C5_12 C4_12 C8_12 121.9(9) . . ? 
C6_12 C5_12 C4_12 120.0 . . ? 
C6_12 C5_12 H5_12 120.0 . . ? 
C4_12 C5_12 H5_12 120.0 . . ? 
O5_12 C6_12 C5_12 120.6(10) . . ? 
O5_12 C6_12 C7_12 119.4(10) . . ? 
C5_12 C6_12 C7_12 120.0 . . ? 
C6_12 C7_12 C2_12 120.0 . . ? 
C6_12 C7_12 H7_12 120.0 . . ? 
C2_12 C7_12 H7_12 120.0 . . ? 
O4_12 C8_12 O3_12 131.7(16) . . ? 
O4_12 C8_12 C4_12 114.2(14) . . ? 
O3_12 C8_12 C4_12 114.1(13) . . ? 
C1_19 N_19 C3_19 120.5(10) . . ? 
C1_19 N_19 C4_19 128.5(11) . . ? 
C3_19 N_19 C4_19 109.9(13) . . ? 
C1_19 O_19 Cu1 138.6(6) . . ? 
O_19 C1_19 N_19 120.9 . . ? 
O_19 C1_19 C2_19 119.9 . . ? 
N_19 C1_19 C2_19 119.2 . . ? 
C1_19 C2_19 H2A_19 109.5 . . ? 
C1_19 C2_19 H2B_19 109.5 . . ? 
H2A_19 C2_19 H2B_19 109.5 . . ? 
C1_19 C2_19 H2C_19 109.5 . . ? 
H2A_19 C2_19 H2C_19 109.5 . . ? 
H2B_19 C2_19 H2C_19 109.5 . . ? 
N_19 C3_19 H3A_19 109.5 . . ? 
N_19 C3_19 H3B_19 109.5 . . ? 
H3A_19 C3_19 H3B_19 109.5 . . ? 
N_19 C3_19 H3C_19 109.5 . . ? 
H3A_19 C3_19 H3C_19 109.5 . . ? 
H3B_19 C3_19 H3C_19 109.5 . . ? 
N_19 C4_19 H4A_19 109.5 . . ? 
N_19 C4_19 H4B_19 109.5 . . ? 
H4A_19 C4_19 H4B_19 109.5 . . ? 
N_19 C4_19 H4C_19 109.5 . . ? 
H4A_19 C4_19 H4C_19 109.5 . . ? 
H4B_19 C4_19 H4C_19 109.5 . . ? 
C1_20 N_20 C3_20 121.8(8) . . ? 
C1_20 N_20 C4_20 122.9(9) . . ? 
C3_20 N_20 C4_20 115.0(11) . . ? 
C1_20 O_20 Cu3 119.8(5) . . ? 
O_20 C1_20 N_20 120.9 . . ? 
O_20 C1_20 C2_20 119.9 . . ? 
N_20 C1_20 C2_20 119.2 . . ? 
C1_20 C2_20 H2A_20 109.5 . . ? 
C1_20 C2_20 H2B_20 109.5 . . ? 
H2A_20 C2_20 H2B_20 109.5 . . ? 
C1_20 C2_20 H2C_20 109.5 . . ? 
H2A_20 C2_20 H2C_20 109.5 . . ? 
H2B_20 C2_20 H2C_20 109.5 . . ? 
N_20 C3_20 H3A_20 109.5 . . ? 
N_20 C3_20 H3B_20 109.5 . . ? 
H3A_20 C3_20 H3B_20 109.5 . . ? 
N_20 C3_20 H3C_20 109.5 . . ? 
H3A_20 C3_20 H3C_20 109.5 . . ? 
H3B_20 C3_20 H3C_20 109.5 . . ? 
N_20 C4_20 H4A_20 109.5 . . ? 
N_20 C4_20 H4B_20 109.5 . . ? 
H4A_20 C4_20 H4B_20 109.5 . . ? 
N_20 C4_20 H4C_20 109.5 . . ? 
H4A_20 C4_20 H4C_20 109.5 . . ? 
H4B_20 C4_20 H4C_20 109.5 . . ? 
C1_21 N_21 C3_21 118.7(9) . . ? 
C1_21 N_21 C4_21 121.9(10) . . ? 
C3_21 N_21 C4_21 119.1(11) . . ? 
C1_21 O_21 Cu5 137.7(5) . . ? 
O_21 C1_21 N_21 120.9 . . ? 
O_21 C1_21 C2_21 119.9 . . ? 
N_21 C1_21 C2_21 119.2 . . ? 
C1_21 C2_21 H2A_21 109.5 . . ? 
C1_21 C2_21 H2B_21 109.5 . . ? 
H2A_21 C2_21 H2B_21 109.5 . . ? 
C1_21 C2_21 H2C_21 109.5 . . ? 
H2A_21 C2_21 H2C_21 109.5 . . ? 
H2B_21 C2_21 H2C_21 109.5 . . ? 
N_21 C3_21 H3A_21 109.5 . . ? 
N_21 C3_21 H3B_21 109.5 . . ? 
H3A_21 C3_21 H3B_21 109.5 . . ? 
N_21 C3_21 H3C_21 109.5 . . ? 
H3A_21 C3_21 H3C_21 109.5 . . ? 
H3B_21 C3_21 H3C_21 109.5 . . ? 
N_21 C4_21 H4A_21 109.5 . . ? 
N_21 C4_21 H4B_21 109.5 . . ? 
H4A_21 C4_21 H4B_21 109.5 . . ? 
N_21 C4_21 H4C_21 109.5 . . ? 
H4A_21 C4_21 H4C_21 109.5 . . ? 
H4B_21 C4_21 H4C_21 109.5 . . ? 
C1_22 N_22 C3_22 120.2(7) . . ? 
C1_22 N_22 C4_22 123.3(9) . . ? 
C3_22 N_22 C4_22 116.4(10) . . ? 
C1_22 O_22 Cu6 117.6(4) . . ? 
O_22 C1_22 N_22 120.9 . . ? 
O_22 C1_22 C2_22 119.9 . . ? 
N_22 C1_22 C2_22 119.2 . . ? 
C1_22 C2_22 H2A_22 109.5 . . ? 
C1_22 C2_22 H2B_22 109.5 . . ? 
H2A_22 C2_22 H2B_22 109.5 . . ? 
C1_22 C2_22 H2C_22 109.5 . . ? 
H2A_22 C2_22 H2C_22 109.5 . . ? 
H2B_22 C2_22 H2C_22 109.5 . . ? 
N_22 C3_22 H3A_22 109.5 . . ? 
N_22 C3_22 H3B_22 109.5 . . ? 
H3A_22 C3_22 H3B_22 109.5 . . ? 
N_22 C3_22 H3C_22 109.5 . . ? 
H3A_22 C3_22 H3C_22 109.5 . . ? 
H3B_22 C3_22 H3C_22 109.5 . . ? 
N_22 C4_22 H4A_22 109.5 . . ? 
N_22 C4_22 H4B_22 109.5 . . ? 
H4A_22 C4_22 H4B_22 109.5 . . ? 
N_22 C4_22 H4C_22 109.5 . . ? 
H4A_22 C4_22 H4C_22 109.5 . . ? 
H4B_22 C4_22 H4C_22 109.5 . . ? 
C1_23 N_23 C3_23 112.7(9) . . ? 
C1_23 N_23 C4_23 115.7(10) . . ? 
C3_23 N_23 C4_23 130.5(13) . . ? 
C1_23 O_23 Cu8 119.6(5) . . ? 
O_23 C1_23 N_23 120.9 . . ? 
O_23 C1_23 C2_23 119.9 . . ? 
N_23 C1_23 C2_23 119.2 . . ? 
C1_23 C2_23 H2A_23 109.5 . . ? 
C1_23 C2_23 H2B_23 109.5 . . ? 
H2A_23 C2_23 H2B_23 109.5 . . ? 
C1_23 C2_23 H2C_23 109.5 . . ? 
H2A_23 C2_23 H2C_23 109.5 . . ? 
H2B_23 C2_23 H2C_23 109.5 . . ? 
N_23 C3_23 H3A_23 109.5 . . ? 
N_23 C3_23 H3B_23 109.5 . . ? 
H3A_23 C3_23 H3B_23 109.5 . . ? 
N_23 C3_23 H3C_23 109.5 . . ? 
H3A_23 C3_23 H3C_23 109.5 . . ? 
H3B_23 C3_23 H3C_23 109.5 . . ? 
N_23 C4_23 H4A_23 109.5 . . ? 
N_23 C4_23 H4B_23 109.5 . . ? 
H4A_23 C4_23 H4B_23 109.5 . . ? 
N_23 C4_23 H4C_23 109.5 . . ? 
H4A_23 C4_23 H4C_23 109.5 . . ? 
H4B_23 C4_23 H4C_23 109.5 . . ? 
C3A_24 NA_24 C1A_24 125.5(16) . . ? 
C3A_24 NA_24 C4A_24 115(2) . . ? 
C1A_24 NA_24 C4A_24 118.9(17) . . ? 
C1A_24 OA_24 Cu12 117.7(11) . . ? 
OA_24 C1A_24 NA_24 120.9 . . ? 
OA_24 C1A_24 C2A_24 119.9 . . ? 
NA_24 C1A_24 C2A_24 119.2 . . ? 
C1A_24 C2A_24 H2AA_24 109.5 . . ? 
C1A_24 C2A_24 H2AB_24 109.5 . . ? 
H2AA_24 C2A_24 H2AB_24 109.5 . . ? 
C1A_24 C2A_24 H2AC_24 109.5 . . ? 
H2AA_24 C2A_24 H2AC_24 109.5 . . ? 
H2AB_24 C2A_24 H2AC_24 109.5 . . ? 
NA_24 C3A_24 H3AA_24 109.5 . . ? 
NA_24 C3A_24 H3AB_24 109.5 . . ? 
H3AA_24 C3A_24 H3AB_24 109.5 . . ? 
NA_24 C3A_24 H3AC_24 109.5 . . ? 
H3AA_24 C3A_24 H3AC_24 109.5 . . ? 
H3AB_24 C3A_24 H3AC_24 109.5 . . ? 
NA_24 C4A_24 H4AA_24 109.5 . . ? 
NA_24 C4A_24 H4AB_24 109.5 . . ? 
H4AA_24 C4A_24 H4AB_24 109.5 . . ? 
NA_24 C4A_24 H4AC_24 109.5 . . ? 
H4AA_24 C4A_24 H4AC_24 109.5 . . ? 
H4AB_24 C4A_24 H4AC_24 109.5 . . ? 
C1B_24 NB_24 C4B_24 128(3) . . ? 
C1B_24 NB_24 C3B_24 106.9(15) . . ? 
C4B_24 NB_24 C3B_24 118(2) . . ? 
C1B_24 OB_24 Cu12 118.6(15) . . ? 
OB_24 C1B_24 NB_24 120.9 . . ? 
OB_24 C1B_24 C2B_24 119.9 . . ? 
NB_24 C1B_24 C2B_24 119.2 . . ? 
C1B_24 C2B_24 H2BA_24 109.5 . . ? 
C1B_24 C2B_24 H2BB_24 109.5 . . ? 
H2BA_24 C2B_24 H2BB_24 109.5 . . ? 
C1B_24 C2B_24 H2BC_24 109.5 . . ? 
H2BA_24 C2B_24 H2BC_24 109.5 . . ? 
H2BB_24 C2B_24 H2BC_24 109.5 . . ? 
NB_24 C3B_24 H3BA_24 109.5 . . ? 
NB_24 C3B_24 H3BB_24 109.5 . . ? 
H3BA_24 C3B_24 H3BB_24 109.5 . . ? 
NB_24 C3B_24 H3BC_24 109.5 . . ? 
H3BA_24 C3B_24 H3BC_24 109.5 . . ? 
H3BB_24 C3B_24 H3BC_24 109.5 . . ? 
NB_24 C4B_24 H4BA_24 109.5 . . ? 
NB_24 C4B_24 H4BB_24 109.5 . . ? 
H4BA_24 C4B_24 H4BB_24 109.5 . . ? 
NB_24 C4B_24 H4BC_24 109.5 . . ? 
H4BA_24 C4B_24 H4BC_24 109.5 . . ? 
H4BB_24 C4B_24 H4BC_24 109.5 . . ? 
C1_25 N_25 C4_25 123.0(13) . . ? 
C1_25 N_25 C3_25 117.2(13) . . ? 
C4_25 N_25 C3_25 119.8(16) . . ? 
O_25 C1_25 N_25 120.9 . . ? 
O_25 C1_25 C2_25 119.9 . . ? 
N_25 C1_25 C2_25 119.2 . . ? 
C1_25 C2_25 H2A_25 109.5 . . ? 
C1_25 C2_25 H2B_25 109.5 . . ? 
H2A_25 C2_25 H2B_25 109.5 . . ? 
C1_25 C2_25 H2C_25 109.5 . . ? 
H2A_25 C2_25 H2C_25 109.5 . . ? 
H2B_25 C2_25 H2C_25 109.5 . . ? 
N_25 C3_25 H3A_25 109.5 . . ? 
N_25 C3_25 H3B_25 109.5 . . ? 
H3A_25 C3_25 H3B_25 109.5 . . ? 
N_25 C3_25 H3C_25 109.5 . . ? 
H3A_25 C3_25 H3C_25 109.5 . . ? 
H3B_25 C3_25 H3C_25 109.5 . . ? 
N_25 C4_25 H4A_25 109.5 . . ? 
N_25 C4_25 H4B_25 109.5 . . ? 
H4A_25 C4_25 H4B_25 109.5 . . ? 
N_25 C4_25 H4C_25 109.5 . . ? 
H4A_25 C4_25 H4C_25 109.5 . . ? 
H4B_25 C4_25 H4C_25 109.5 . . ? 
C1_26 N_26 C4_26 116.9(15) . . ? 
C1_26 N_26 C3_26 112.7(13) . . ? 
C4_26 N_26 C3_26 130.4(17) . . ? 
O_26 C1_26 N_26 120.9 . . ? 
O_26 C1_26 C2_26 119.9 . . ? 
N_26 C1_26 C2_26 119.2 . . ? 
C1_26 C2_26 H2A_26 109.5 . . ? 
C1_26 C2_26 H2B_26 109.5 . . ? 
H2A_26 C2_26 H2B_26 109.5 . . ? 
C1_26 C2_26 H2C_26 109.5 . . ? 
H2A_26 C2_26 H2C_26 109.5 . . ? 
H2B_26 C2_26 H2C_26 109.5 . . ? 
N_26 C3_26 H3A_26 109.5 . . ? 
N_26 C3_26 H3B_26 109.5 . . ? 
H3A_26 C3_26 H3B_26 109.5 . . ? 
N_26 C3_26 H3C_26 109.5 . . ? 
H3A_26 C3_26 H3C_26 109.5 . . ? 
H3B_26 C3_26 H3C_26 109.5 . . ? 
N_26 C4_26 H4A_26 109.5 . . ? 
N_26 C4_26 H4B_26 109.5 . . ? 
H4A_26 C4_26 H4B_26 109.5 . . ? 
N_26 C4_26 H4C_26 109.5 . . ? 
H4A_26 C4_26 H4C_26 109.5 . . ? 
H4B_26 C4_26 H4C_26 109.5 . . ? 
C1_27 N_27 C3_27 115.2(11) . . ? 
C1_27 N_27 C4_27 123.5(13) . . ? 
C3_27 N_27 C4_27 121.2(14) . . ? 
O_27 C1_27 N_27 120.9 . . ? 
O_27 C1_27 C2_27 119.9 . . ? 
N_27 C1_27 C2_27 119.2 . . ? 
C1_27 C2_27 H2A_27 109.5 . . ? 
C1_27 C2_27 H2B_27 109.5 . . ? 
H2A_27 C2_27 H2B_27 109.5 . . ? 
C1_27 C2_27 H2C_27 109.5 . . ? 
H2A_27 C2_27 H2C_27 109.5 . . ? 
H2B_27 C2_27 H2C_27 109.5 . . ? 
N_27 C3_27 H3A_27 109.5 . . ? 
N_27 C3_27 H3B_27 109.5 . . ? 
H3A_27 C3_27 H3B_27 109.5 . . ? 
N_27 C3_27 H3C_27 109.5 . . ? 
H3A_27 C3_27 H3C_27 109.5 . . ? 
H3B_27 C3_27 H3C_27 109.5 . . ? 
N_27 C4_27 H4A_27 109.5 . . ? 
N_27 C4_27 H4B_27 109.5 . . ? 
H4A_27 C4_27 H4B_27 109.5 . . ? 
N_27 C4_27 H4C_27 109.5 . . ? 
H4A_27 C4_27 H4C_27 109.5 . . ? 
H4B_27 C4_27 H4C_27 109.5 . . ? 
  
loop_ 
 _geom_torsion_atom_site_label_1 
 _geom_torsion_atom_site_label_2 
 _geom_torsion_atom_site_label_3 
 _geom_torsion_atom_site_label_4 
 _geom_torsion 
 _geom_torsion_site_symmetry_1 
 _geom_torsion_site_symmetry_2 
 _geom_torsion_site_symmetry_3 
 _geom_torsion_site_symmetry_4 
 _geom_torsion_publ_flag 
Cu2 O2_1 C1_1 O1_1 -2(2) . . . . ? 
Cu2 O2_1 C1_1 C2_1 -175.9(9) . . . . ? 
Cu1 O1_1 C1_1 O2_1 -3(2) . . . . ? 
Cu1 O1_1 C1_1 C2_1 170.5(8) . . . . ? 
O2_1 C1_1 C2_1 C7_1 171.0(13) . . . . ? 
O1_1 C1_1 C2_1 C7_1 -3.8(19) . . . . ? 
O2_1 C1_1 C2_1 C3_1 -10(2) . . . . ? 
O1_1 C1_1 C2_1 C3_1 175.6(12) . . . . ? 
C7_1 C2_1 C3_1 C4_1 1(2) . . . . ? 
C1_1 C2_1 C3_1 C4_1 -178.7(13) . . . . ? 
C2_1 C3_1 C4_1 C5_1 -4(2) . . . . ? 
C2_1 C3_1 C4_1 O5_1 -177.0(12) . . . . ? 
C3_1 C4_1 C5_1 C6_1 5(2) . . . . ? 
O5_1 C4_1 C5_1 C6_1 177.0(12) . . . . ? 
C4_1 C5_1 C6_1 C7_1 -2(2) . . . . ? 
C4_1 C5_1 C6_1 C8_1 -176.4(13) . . . . ? 
C3_1 C2_1 C7_1 C6_1 2(2) . . . . ? 
C1_1 C2_1 C7_1 C6_1 -178.4(13) . . . . ? 
C5_1 C6_1 C7_1 C2_1 -2(2) . . . . ? 
C8_1 C6_1 C7_1 C2_1 172.4(14) . . . . ? 
Cu12 O4_1 C8_1 O3_1 -13.2(18) . . . . ? 
Cu12 O4_1 C8_1 C6_1 169.5(9) . . . . ? 
Cu11 O3_1 C8_1 O4_1 5.6(18) . . . . ? 
Cu11 O3_1 C8_1 C6_1 -177.0(8) . . . . ? 
C7_1 C6_1 C8_1 O4_1 180.0(13) . . . . ? 
C5_1 C6_1 C8_1 O4_1 -6.0(19) . . . . ? 
C7_1 C6_1 C8_1 O3_1 2(2) . . . . ? 
C5_1 C6_1 C8_1 O3_1 176.4(11) . . . . ? 
C5_1 C4_1 O5_1 C9_1 -4(2) . . . . ? 
C3_1 C4_1 O5_1 C9_1 168.8(13) . . . . ? 
C4_1 O5_1 C9_1 C10_1 -171.6(12) . . . . ? 
O5_1 C9_1 C10_1 C11_1 63.3(19) . . . . ? 
Cu2 O2_2 C1_2 O1_2 -6(2) . . . . ? 
Cu2 O2_2 C1_2 C2_2 173.5(10) . . . . ? 
Cu1 O1_2 C1_2 O2_2 0(2) . . . . ? 
Cu1 O1_2 C1_2 C2_2 180.0(10) . . . . ? 
O2_2 C1_2 C2_2 C7_2 -172.0(14) . . . . ? 
O1_2 C1_2 C2_2 C7_2 8(2) . . . . ? 
O2_2 C1_2 C2_2 C3_2 5(2) . . . . ? 
O1_2 C1_2 C2_2 C3_2 -174.8(14) . . . . ? 
C7_2 C2_2 C3_2 C4_2 0(2) . . . . ? 
C1_2 C2_2 C3_2 C4_2 -177.4(14) . . . . ? 
C2_2 C3_2 C4_2 O5_2 -178.5(14) . . . . ? 
C2_2 C3_2 C4_2 C5_2 1(2) . . . . ? 
O5_2 C4_2 C5_2 C6_2 179.7(13) . . . . ? 
C3_2 C4_2 C5_2 C6_2 0(2) . . . . ? 
C4_2 C5_2 C6_2 C7_2 -2(2) . . . . ? 
C4_2 C5_2 C6_2 C8_2 176.0(13) . . . . ? 
C5_2 C6_2 C7_2 C2_2 3(2) . . . . ? 
C8_2 C6_2 C7_2 C2_2 -175.1(13) . . . . ? 
C3_2 C2_2 C7_2 C6_2 -2(2) . . . . ? 
C1_2 C2_2 C7_2 C6_2 175.2(14) . . . . ? 
Cu4 O4_2 C8_2 O3_2 2.9(18) . . . . ? 
Cu4 O4_2 C8_2 C6_2 -179.9(9) . . . . ? 
Cu3 O3_2 C8_2 O4_2 -8.9(18) . . . . ? 
Cu3 O3_2 C8_2 C6_2 173.8(8) . . . . ? 
C7_2 C6_2 C8_2 O4_2 169.6(13) . . . . ? 
C5_2 C6_2 C8_2 O4_2 -9(2) . . . . ? 
C7_2 C6_2 C8_2 O3_2 -12.8(18) . . . . ? 
C5_2 C6_2 C8_2 O3_2 169.0(13) . . . . ? 
C3_2 C4_2 O5_2 C9_2 4(2) . . . . ? 
C5_2 C4_2 O5_2 C9_2 -175.8(13) . . . . ? 
C4_2 O5_2 C9_2 C10_2 173.2(13) . . . . ? 
O5_2 C9_2 C10_2 C11_2 -177.7(12) . . . . ? 
Cu1 O1_3 C1_3 O2_3 -3.8(19) . . . . ? 
Cu1 O1_3 C1_3 C2_3 177.1(9) . . . . ? 
Cu2 O2_3 C1_3 O1_3 -2(2) . . . . ? 
Cu2 O2_3 C1_3 C2_3 177.1(8) . . . . ? 
O1_3 C1_3 C2_3 C3_3 177.0(11) . . . . ? 
O2_3 C1_3 C2_3 C3_3 -2.2(15) . . . . ? 
O1_3 C1_3 C2_3 C7_3 -8.3(18) . . . . ? 
O2_3 C1_3 C2_3 C7_3 172.5(9) . . . . ? 
C7_3 C2_3 C3_3 C4_3 0.0 . . . . ? 
C1_3 C2_3 C3_3 C4_3 174.9(11) . . . . ? 
C2_3 C3_3 C4_3 O5_3 -172.0(12) . . . . ? 
C2_3 C3_3 C4_3 C5_3 0.0 . . . . ? 
O5_3 C4_3 C5_3 C6_3 172.4(12) . . . . ? 
C3_3 C4_3 C5_3 C6_3 0.0 . . . . ? 
C4_3 C5_3 C6_3 C7_3 0.0 . . . . ? 
C4_3 C5_3 C6_3 C8_3 -178.9(12) . . . . ? 
C5_3 C6_3 C7_3 C2_3 0.0 . . . . ? 
C8_3 C6_3 C7_3 C2_3 179.0(12) . . . . ? 
C3_3 C2_3 C7_3 C6_3 0.0 . . . . ? 
C1_3 C2_3 C7_3 C6_3 -174.5(12) . . . . ? 
Cu9 O3_3 C8_3 O4_3 6(2) 2_666 . . . ? 
Cu9 O3_3 C8_3 C6_3 -172.4(10) 2_666 . . . ? 
Cu10 O4_3 C8_3 O3_3 -10(3) 2_666 . . . ? 
Cu10 O4_3 C8_3 C6_3 169.4(9) 2_666 . . . ? 
C7_3 C6_3 C8_3 O3_3 3(2) . . . . ? 
C5_3 C6_3 C8_3 O3_3 -178.0(12) . . . . ? 
C7_3 C6_3 C8_3 O4_3 -176.0(11) . . . . ? 
C5_3 C6_3 C8_3 O4_3 3.0(19) . . . . ? 
C5_3 C4_3 O5_3 C9_3 -158.7(14) . . . . ? 
C3_3 C4_3 O5_3 C9_3 14(2) . . . . ? 
C4_3 O5_3 C9_3 C10_3 167.6(16) . . . . ? 
O5_3 C9_3 C10_3 C11_3 -149.2(19) . . . . ? 
Cu4 O2_4 C1_4 O1_4 4.2(18) . . . . ? 
Cu4 O2_4 C1_4 C2_4 -177.8(8) . . . . ? 
Cu3 O1_4 C1_4 O2_4 -10.1(18) . . . . ? 
Cu3 O1_4 C1_4 C2_4 171.9(8) . . . . ? 
O2_4 C1_4 C2_4 C3_4 -2.7(18) . . . . ? 
O1_4 C1_4 C2_4 C3_4 175.6(12) . . . . ? 
O2_4 C1_4 C2_4 C7_4 173.8(11) . . . . ? 
O1_4 C1_4 C2_4 C7_4 -7.9(17) . . . . ? 
C7_4 C2_4 C3_4 C4_4 -1(2) . . . . ? 
C1_4 C2_4 C3_4 C4_4 175.6(12) . . . . ? 
C2_4 C3_4 C4_4 C5_4 3(2) . . . . ? 
C2_4 C3_4 C4_4 O5_4 -179.7(12) . . . . ? 
C3_4 C4_4 C5_4 C6_4 -5(2) . . . . ? 
O5_4 C4_4 C5_4 C6_4 178.1(12) . . . . ? 
C4_4 C5_4 C6_4 C7_4 4(2) . . . . ? 
C4_4 C5_4 C6_4 C8_4 -172.5(12) . . . . ? 
C5_4 C6_4 C7_4 C2_4 -2(2) . . . . ? 
C8_4 C6_4 C7_4 C2_4 174.6(11) . . . . ? 
C3_4 C2_4 C7_4 C6_4 0(2) . . . . ? 
C1_4 C2_4 C7_4 C6_4 -176.2(12) . . . . ? 
Cu6 O4_4 C8_4 O3_4 -9.4(16) . . . . ? 
Cu6 O4_4 C8_4 C6_4 169.3(8) . . . . ? 
Cu5 O3_4 C8_4 O4_4 10.4(16) . . . . ? 
Cu5 O3_4 C8_4 C6_4 -168.4(8) . . . . ? 
C7_4 C6_4 C8_4 O4_4 -173.8(12) . . . . ? 
C5_4 C6_4 C8_4 O4_4 2.8(18) . . . . ? 
C7_4 C6_4 C8_4 O3_4 5.1(17) . . . . ? 
C5_4 C6_4 C8_4 O3_4 -178.3(11) . . . . ? 
C5_4 C4_4 O5_4 C9_4 -19(2) . . . . ? 
C3_4 C4_4 O5_4 C9_4 163.5(13) . . . . ? 
Cu3 O1_5 C1_5 O2_5 -5.9(17) . . . . ? 
Cu3 O1_5 C1_5 C2_5 175.3(7) . . . . ? 
Cu4 O2_5 C1_5 O1_5 -0.7(17) . . . . ? 
Cu4 O2_5 C1_5 C2_5 178.1(7) . . . . ? 
O1_5 C1_5 C2_5 C7_5 10.6(17) . . . . ? 
O2_5 C1_5 C2_5 C7_5 -168.3(11) . . . . ? 
O1_5 C1_5 C2_5 C3_5 -166.3(11) . . . . ? 
O2_5 C1_5 C2_5 C3_5 14.8(17) . . . . ? 
C7_5 C2_5 C3_5 C4_5 0.5(18) . . . . ? 
C1_5 C2_5 C3_5 C4_5 177.5(11) . . . . ? 
C2_5 C3_5 C4_5 C5_5 5(2) . . . . ? 
C2_5 C3_5 C4_5 O5_5 -179.3(11) . . . . ? 
C3_5 C4_5 C5_5 C6_5 -7(2) . . . . ? 
O5_5 C4_5 C5_5 C6_5 177.2(12) . . . . ? 
C4_5 C5_5 C6_5 C7_5 4.7(18) . . . . ? 
C4_5 C5_5 C6_5 C8_5 -177.0(11) . . . . ? 
C5_5 C6_5 C7_5 C2_5 0.3(18) . . . . ? 
C8_5 C6_5 C7_5 C2_5 -177.9(11) . . . . ? 
C3_5 C2_5 C7_5 C6_5 -2.9(18) . . . . ? 
C1_5 C2_5 C7_5 C6_5 -179.9(11) . . . . ? 
Cu8 O4_5 C8_5 O3_5 2.0(17) . . . . ? 
Cu8 O4_5 C8_5 C6_5 -177.8(7) . . . . ? 
Cu7 O3_5 C8_5 O4_5 1.6(16) . . . . ? 
Cu7 O3_5 C8_5 C6_5 -178.6(7) . . . . ? 
C7_5 C6_5 C8_5 O4_5 164.2(11) . . . . ? 
C5_5 C6_5 C8_5 O4_5 -14.0(17) . . . . ? 
C7_5 C6_5 C8_5 O3_5 -15.5(16) . . . . ? 
C5_5 C6_5 C8_5 O3_5 166.3(11) . . . . ? 
C5_5 C4_5 O5_5 C9_5 -7.8(19) . . . . ? 
C3_5 C4_5 O5_5 C9_5 176.4(11) . . . . ? 
C4_5 O5_5 C9_5 C10_5 -168.2(12) . . . . ? 
Cu3 O1_6 C1_6 O2_6 -1.7(18) . . . . ? 
Cu3 O1_6 C1_6 C2_6 -179.2(9) . . . . ? 
Cu4 O2_6 C1_6 O1_6 -2.9(19) . . . . ? 
Cu4 O2_6 C1_6 C2_6 174.5(9) . . . . ? 
O1_6 C1_6 C2_6 C7_6 -3(2) . . . . ? 
O2_6 C1_6 C2_6 C7_6 179.8(13) . . . . ? 
O1_6 C1_6 C2_6 C3_6 179.3(13) . . . . ? 
O2_6 C1_6 C2_6 C3_6 2(2) . . . . ? 
C7_6 C2_6 C3_6 C4_6 6(2) . . . . ? 
C1_6 C2_6 C3_6 C4_6 -175.4(15) . . . . ? 
C2_6 C3_6 C4_6 O5_6 174.7(15) . . . . ? 
C2_6 C3_6 C4_6 C5_6 -5(3) . . . . ? 
O5_6 C4_6 C5_6 C6_6 -179.3(16) . . . . ? 
C3_6 C4_6 C5_6 C6_6 1(3) . . . . ? 
C4_6 C5_6 C6_6 C7_6 3(3) . . . . ? 
C4_6 C5_6 C6_6 C8_6 177.8(15) . . . . ? 
C3_6 C2_6 C7_6 C6_6 -3(2) . . . . ? 
C1_6 C2_6 C7_6 C6_6 179.2(13) . . . . ? 
C5_6 C6_6 C7_6 C2_6 -2(2) . . . . ? 
C8_6 C6_6 C7_6 C2_6 -176.9(14) . . . . ? 
Cu9 O3_6 C8_6 O4_6 -3(2) 2_666 . . . ? 
Cu9 O3_6 C8_6 C6_6 172.4(10) 2_666 . . . ? 
Cu10 O4_6 C8_6 O3_6 3(2) 2_666 . . . ? 
Cu10 O4_6 C8_6 C6_6 -172.2(10) 2_666 . . . ? 
C5_6 C6_6 C8_6 O3_6 177.7(15) . . . . ? 
C7_6 C6_6 C8_6 O3_6 -7(2) . . . . ? 
C5_6 C6_6 C8_6 O4_6 -6(2) . . . . ? 
C7_6 C6_6 C8_6 O4_6 168.7(14) . . . . ? 
C3_6 C4_6 O5_6 C9_6 -173.5(17) . . . . ? 
C5_6 C4_6 O5_6 C9_6 7(3) . . . . ? 
C4_6 O5_6 C9_6 C10_6 178.9(17) . . . . ? 
O5_6 C9_6 C10_6 C11_6 -176.5(17) . . . . ? 
Cu5 O1_7 C1_7 O2_7 0(2) . . . . ? 
Cu5 O1_7 C1_7 C2_7 176.9(9) . . . . ? 
Cu6 O2_7 C1_7 O1_7 1(2) . . . . ? 
Cu6 O2_7 C1_7 C2_7 -176.6(8) . . . . ? 
O1_7 C1_7 C2_7 C7_7 0(2) . . . . ? 
O2_7 C1_7 C2_7 C7_7 177.4(14) . . . . ? 
O1_7 C1_7 C2_7 C3_7 178.8(14) . . . . ? 
O2_7 C1_7 C2_7 C3_7 -4(2) . . . . ? 
C7_7 C2_7 C3_7 C4_7 -1(2) . . . . ? 
C1_7 C2_7 C3_7 C4_7 179.9(14) . . . . ? 
C2_7 C3_7 C4_7 O5_7 -178.2(16) . . . . ? 
C2_7 C3_7 C4_7 C5_7 0(2) . . . . ? 
O5_7 C4_7 C5_7 C6_7 -179.9(14) . . . . ? 
C3_7 C4_7 C5_7 C6_7 2(2) . . . . ? 
C4_7 C5_7 C6_7 C7_7 -2(2) . . . . ? 
C4_7 C5_7 C6_7 C8_7 -175.8(15) . . . . ? 
C3_7 C2_7 C7_7 C6_7 1(2) . . . . ? 
C1_7 C2_7 C7_7 C6_7 179.7(13) . . . . ? 
C5_7 C6_7 C7_7 C2_7 1(2) . . . . ? 
C8_7 C6_7 C7_7 C2_7 174.3(15) . . . . ? 
Cu11 O3_7 C8_7 O4_7 11(2) 2_666 . . . ? 
Cu11 O3_7 C8_7 C6_7 -174.4(11) 2_666 . . . ? 
Cu12 O4_7 C8_7 O3_7 -9(2) 2_666 . . . ? 
Cu12 O4_7 C8_7 C6_7 176.4(10) 2_666 . . . ? 
C7_7 C6_7 C8_7 O3_7 10(2) . . . . ? 
C5_7 C6_7 C8_7 O3_7 -176.8(14) . . . . ? 
C7_7 C6_7 C8_7 O4_7 -174.8(13) . . . . ? 
C5_7 C6_7 C8_7 O4_7 -1(2) . . . . ? 
C3_7 C4_7 O5_7 C9_7 8(2) . . . . ? 
C5_7 C4_7 O5_7 C9_7 -169.7(14) . . . . ? 
C4_7 O5_7 C9_7 C10_7 174.8(13) . . . . ? 
O5_7 C9_7 C10_7 C11_7 60(2) . . . . ? 
Cu6 O2_8 C1_8 O1_8 -3.7(17) . . . . ? 
Cu6 O2_8 C1_8 C2_8 170.7(8) . . . . ? 
Cu5 O1_8 C1_8 O2_8 0.8(16) . . . . ? 
Cu5 O1_8 C1_8 C2_8 -173.5(9) . . . . ? 
O2_8 C1_8 C2_8 C3_8 18.7(19) . . . . ? 
O1_8 C1_8 C2_8 C3_8 -166.5(13) . . . . ? 
O2_8 C1_8 C2_8 C7_8 -158.3(12) . . . . ? 
O1_8 C1_8 C2_8 C7_8 16.5(19) . . . . ? 
C7_8 C2_8 C3_8 C4_8 0(2) . . . . ? 
C1_8 C2_8 C3_8 C4_8 -176.6(14) . . . . ? 
C2_8 C3_8 C4_8 O5_8 -178.0(14) . . . . ? 
C2_8 C3_8 C4_8 C5_8 2(2) . . . . ? 
O5_8 C4_8 C5_8 C6_8 177.1(15) . . . . ? 
C3_8 C4_8 C5_8 C6_8 -2(2) . . . . ? 
C4_8 C5_8 C6_8 C7_8 1(2) . . . . ? 
C4_8 C5_8 C6_8 C8_8 -179.5(15) . . . . ? 
C5_8 C6_8 C7_8 C2_8 1(2) . . . . ? 
C8_8 C6_8 C7_8 C2_8 -178.4(14) . . . . ? 
C3_8 C2_8 C7_8 C6_8 -2(2) . . . . ? 
C1_8 C2_8 C7_8 C6_8 175.3(13) . . . . ? 
Cu1 O3_8 C8_8 O4_8 7(2) 2_666 . . . ? 
Cu1 O3_8 C8_8 C6_8 -172.9(10) 2_666 . . . ? 
Cu2 O4_8 C8_8 O3_8 0(2) 2_666 . . . ? 
Cu2 O4_8 C8_8 C6_8 179.5(10) 2_666 . . . ? 
C5_8 C6_8 C8_8 O3_8 173.5(15) . . . . ? 
C7_8 C6_8 C8_8 O3_8 -7(2) . . . . ? 
C5_8 C6_8 C8_8 O4_8 -6(2) . . . . ? 
C7_8 C6_8 C8_8 O4_8 173.0(14) . . . . ? 
C3_8 C4_8 O5_8 C9_8 -168.5(15) . . . . ? 
C5_8 C4_8 O5_8 C9_8 12(2) . . . . ? 
C4_8 O5_8 C9_8 C10_8 174.0(15) . . . . ? 
O5_8 C9_8 C10_8 C11_8 -168.0(15) . . . . ? 
Cu5 O1_9 C1_9 O2_9 0(2) . . . . ? 
Cu5 O1_9 C1_9 C2_9 -177.6(8) . . . . ? 
Cu6 O2_9 C1_9 O1_9 0.4(18) . . . . ? 
Cu6 O2_9 C1_9 C2_9 177.6(8) . . . . ? 
O1_9 C1_9 C2_9 C7_9 -7.4(18) . . . . ? 
O2_9 C1_9 C2_9 C7_9 175.1(12) . . . . ? 
O1_9 C1_9 C2_9 C3_9 173.3(13) . . . . ? 
O2_9 C1_9 C2_9 C3_9 -4.1(18) . . . . ? 
C7_9 C2_9 C3_9 C4_9 4.2(19) . . . . ? 
C1_9 C2_9 C3_9 C4_9 -176.6(11) . . . . ? 
C2_9 C3_9 C4_9 O5_9 -179.9(13) . . . . ? 
C2_9 C3_9 C4_9 C5_9 -2.2(18) . . . . ? 
O5_9 C4_9 C5_9 C6_9 177.3(12) . . . . ? 
C3_9 C4_9 C5_9 C6_9 -1(2) . . . . ? 
C4_9 C5_9 C6_9 C7_9 2(2) . . . . ? 
C4_9 C5_9 C6_9 C8_9 -175.3(12) . . . . ? 
C5_9 C6_9 C7_9 C2_9 0.5(19) . . . . ? 
C8_9 C6_9 C7_9 C2_9 177.5(12) . . . . ? 
C3_9 C2_9 C7_9 C6_9 -3.4(19) . . . . ? 
C1_9 C2_9 C7_9 C6_9 177.4(11) . . . . ? 
Cu7 O3_9 C8_9 O4_9 4.5(19) . . . . ? 
Cu7 O3_9 C8_9 C6_9 -176.1(8) . . . . ? 
Cu8 O4_9 C8_9 O3_9 -3.6(18) . . . . ? 
Cu8 O4_9 C8_9 C6_9 177.0(8) . . . . ? 
C5_9 C6_9 C8_9 O3_9 -167.6(13) . . . . ? 
C7_9 C6_9 C8_9 O3_9 15.4(18) . . . . ? 
C5_9 C6_9 C8_9 O4_9 11.8(19) . . . . ? 
C7_9 C6_9 C8_9 O4_9 -165.1(11) . . . . ? 
C5_9 C4_9 O5_9 C9_9 179.6(11) . . . . ? 
C3_9 C4_9 O5_9 C9_9 -2.7(19) . . . . ? 
C4_9 O5_9 C9_9 C10_9 -176.6(11) . . . . ? 
O5_9 C9_9 C10_9 C11_9 -179.8(11) . . . . ? 
Cu7 O1_10 C1_10 O2_10 3(2) . . . . ? 
Cu7 O1_10 C1_10 C2_10 -171.6(9) . . . . ? 
Cu8 O2_10 C1_10 O1_10 -1.5(19) . . . . ? 
Cu8 O2_10 C1_10 C2_10 173.5(9) . . . . ? 
O1_10 C1_10 C2_10 C7_10 5(2) . . . . ? 
O2_10 C1_10 C2_10 C7_10 -170.3(14) . . . . ? 
O1_10 C1_10 C2_10 C3_10 -176.0(14) . . . . ? 
O2_10 C1_10 C2_10 C3_10 9(2) . . . . ? 
C7_10 C2_10 C3_10 C4_10 1(2) . . . . ? 
C1_10 C2_10 C3_10 C4_10 -178.2(15) . . . . ? 
C2_10 C3_10 C4_10 O5_10 -179.7(14) . . . . ? 
C2_10 C3_10 C4_10 C5_10 2(3) . . . . ? 
C3_10 C4_10 C5_10 C6_10 -3(3) . . . . ? 
O5_10 C4_10 C5_10 C6_10 178.8(15) . . . . ? 
C4_10 C5_10 C6_10 C7_10 1(2) . . . . ? 
C4_10 C5_10 C6_10 C8_10 178.7(15) . . . . ? 
C3_10 C2_10 C7_10 C6_10 -2(2) . . . . ? 
C1_10 C2_10 C7_10 C6_10 176.6(14) . . . . ? 
C5_10 C6_10 C7_10 C2_10 1(2) . . . . ? 
C8_10 C6_10 C7_10 C2_10 -176.3(15) . . . . ? 
Cu11 O3_10 C8_10 O4_10 -6(2) . . . . ? 
Cu11 O3_10 C8_10 C6_10 175.6(10) . . . . ? 
Cu12 O4_10 C8_10 O3_10 0(2) . . . . ? 
Cu12 O4_10 C8_10 C6_10 178.6(10) . . . . ? 
C5_10 C6_10 C8_10 O3_10 174.5(15) . . . . ? 
C7_10 C6_10 C8_10 O3_10 -8(2) . . . . ? 
C5_10 C6_10 C8_10 O4_10 -4(2) . . . . ? 
C7_10 C6_10 C8_10 O4_10 173.5(14) . . . . ? 
C3_10 C4_10 O5_10 C9_10 -162.6(19) . . . . ? 
C5_10 C4_10 O5_10 C9_10 16(3) . . . . ? 
Cu7 O1_11 C1_11 O2_11 -4(2) . . . . ? 
Cu7 O1_11 C1_11 C2A_11 -170.3(10) . . . . ? 
Cu7 O1_11 C1_11 C2B_11 155.5(11) . . . . ? 
Cu8 O2_11 C1_11 O1_11 3(2) . . . . ? 
Cu8 O2_11 C1_11 C2A_11 168.9(11) . . . . ? 
Cu8 O2_11 C1_11 C2B_11 -158.0(10) . . . . ? 
O1_11 C1_11 C2A_11 C3A_11 157.5(12) . . . . ? 
O2_11 C1_11 C2A_11 C3A_11 -10(2) . . . . ? 
O1_11 C1_11 C2A_11 C7A_11 -32.0(17) . . . . ? 
O2_11 C1_11 C2A_11 C7A_11 160.3(12) . . . . ? 
C7A_11 C2A_11 C3A_11 C4A_11 0.0 . . . . ? 
C1_11 C2A_11 C3A_11 C4A_11 170.3(17) . . . . ? 
C2A_11 C3A_11 C4A_11 O5A_11 179.7(19) . . . . ? 
C2A_11 C3A_11 C4A_11 C5A_11 0.0 . . . . ? 
O5A_11 C4A_11 C5A_11 C6A_11 -180(2) . . . . ? 
C3A_11 C4A_11 C5A_11 C6A_11 0.0 . . . . ? 
C4A_11 C5A_11 C6A_11 C7A_11 0.0 . . . . ? 
C4A_11 C5A_11 C6A_11 C8_11 -164.9(17) . . . . ? 
C5A_11 C6A_11 C7A_11 C2A_11 0.0 . . . . ? 
C8_11 C6A_11 C7A_11 C2A_11 165.9(16) . . . . ? 
C3A_11 C2A_11 C7A_11 C6A_11 0.0 . . . . ? 
C1_11 C2A_11 C7A_11 C6A_11 -170.7(16) . . . . ? 
O1_11 C1_11 C2B_11 C3B_11 -167.4(13) . . . . ? 
O2_11 C1_11 C2B_11 C3B_11 -4.1(19) . . . . ? 
O1_11 C1_11 C2B_11 C7B_11 16.5(19) . . . . ? 
O2_11 C1_11 C2B_11 C7B_11 179.8(11) . . . . ? 
C7B_11 C2B_11 C3B_11 C4B_11 0.0 . . . . ? 
C1_11 C2B_11 C3B_11 C4B_11 -176.0(18) . . . . ? 
C2B_11 C3B_11 C4B_11 C5B_11 0.0 . . . . ? 
C2B_11 C3B_11 C4B_11 O5B_11 179.1(18) . . . . ? 
C3B_11 C4B_11 C5B_11 C6B_11 0.0 . . . . ? 
O5B_11 C4B_11 C5B_11 C6B_11 -179(2) . . . . ? 
C4B_11 C5B_11 C6B_11 C7B_11 0.0 . . . . ? 
C4B_11 C5B_11 C6B_11 C8_11 173.0(18) . . . . ? 
C5B_11 C6B_11 C7B_11 C2B_11 0.0 . . . . ? 
C8_11 C6B_11 C7B_11 C2B_11 -173.7(17) . . . . ? 
C3B_11 C2B_11 C7B_11 C6B_11 0.0 . . . . ? 
C1_11 C2B_11 C7B_11 C6B_11 176.3(17) . . . . ? 
Cu9 O3_11 C8_11 O4_11 13(2) . . . . ? 
Cu9 O3_11 C8_11 C6B_11 -159.7(12) . . . . ? 
Cu9 O3_11 C8_11 C6A_11 163.5(10) . . . . ? 
Cu10 O4_11 C8_11 O3_11 -9(2) . . . . ? 
Cu10 O4_11 C8_11 C6B_11 163.5(11) . . . . ? 
Cu10 O4_11 C8_11 C6A_11 -159.2(11) . . . . ? 
C7B_11 C6B_11 C8_11 O3_11 -17(2) . . . . ? 
C5B_11 C6B_11 C8_11 O3_11 169.6(13) . . . . ? 
C7B_11 C6B_11 C8_11 O4_11 169.2(12) . . . . ? 
C5B_11 C6B_11 C8_11 O4_11 -4(2) . . . . ? 
C7A_11 C6A_11 C8_11 O3_11 37.5(18) . . . . ? 
C5A_11 C6A_11 C8_11 O3_11 -157.0(13) . . . . ? 
C7A_11 C6A_11 C8_11 O4_11 -167.2(12) . . . . ? 
C5A_11 C6A_11 C8_11 O4_11 -2(2) . . . . ? 
C5A_11 C4A_11 O5A_11 C9A_11 26(3) . . . . ? 
C3A_11 C4A_11 O5A_11 C9A_11 -153.5(19) . . . . ? 
C4A_11 O5A_11 C9A_11 C10A_11 6(3) . . . . ? 
O5A_11 C9A_11 C10A_11 C11A_11 -105(3) . . . . ? 
C5B_11 C4B_11 O5B_11 C9B_11 -15(3) . . . . ? 
C3B_11 C4B_11 O5B_11 C9B_11 165.8(19) . . . . ? 
C4B_11 O5B_11 C9B_11 C10B_11 -21(3) . . . . ? 
O5B_11 C9B_11 C10B_11 C11B_11 109(3) . . . . ? 
Cu11 O1_12 C1_12 O2_12 -2(2) . . . . ? 
Cu11 O1_12 C1_12 C2_12 -180.0(7) . . . . ? 
Cu12 O2_12 C1_12 O1_12 -3.1(17) . . . . ? 
Cu12 O2_12 C1_12 C2_12 174.6(8) . . . . ? 
O1_12 C1_12 C2_12 C3_12 4.0(15) . . . . ? 
O2_12 C1_12 C2_12 C3_12 -173.8(9) . . . . ? 
O1_12 C1_12 C2_12 C7_12 179.1(9) . . . . ? 
O2_12 C1_12 C2_12 C7_12 1.3(16) . . . . ? 
C7_12 C2_12 C3_12 C4_12 0.0 . . . . ? 
C1_12 C2_12 C3_12 C4_12 175.2(10) . . . . ? 
C2_12 C3_12 C4_12 C5_12 0.0 . . . . ? 
C2_12 C3_12 C4_12 C8_12 -180.0(10) . . . . ? 
C3_12 C4_12 C5_12 C6_12 0.0 . . . . ? 
C8_12 C4_12 C5_12 C6_12 179.9(10) . . . . ? 
C4_12 C5_12 C6_12 O5_12 -179.6(11) . . . . ? 
C4_12 C5_12 C6_12 C7_12 0.0 . . . . ? 
O5_12 C6_12 C7_12 C2_12 179.6(11) . . . . ? 
C5_12 C6_12 C7_12 C2_12 0.0 . . . . ? 
C3_12 C2_12 C7_12 C6_12 0.0 . . . . ? 
C1_12 C2_12 C7_12 C6_12 -175.0(10) . . . . ? 
Cu10 O4_12 C8_12 O3_12 6(2) . . . . ? 
Cu10 O4_12 C8_12 C4_12 -172.3(8) . . . . ? 
Cu9 O3_12 C8_12 O4_12 -5(2) . . . . ? 
Cu9 O3_12 C8_12 C4_12 173.3(7) . . . . ? 
C3_12 C4_12 C8_12 O4_12 173.7(9) . . . . ? 
C5_12 C4_12 C8_12 O4_12 -6.2(15) . . . . ? 
C3_12 C4_12 C8_12 O3_12 -5.1(15) . . . . ? 
C5_12 C4_12 C8_12 O3_12 174.9(9) . . . . ? 
Cu1 O_19 C1_19 N_19 -162.0(12) . . . . ? 
Cu1 O_19 C1_19 C2_19 17.1(12) . . . . ? 
C3_19 N_19 C1_19 O_19 -1.8(17) . . . . ? 
C4_19 N_19 C1_19 O_19 165.0(17) . . . . ? 
C3_19 N_19 C1_19 C2_19 179.1(18) . . . . ? 
C4_19 N_19 C1_19 C2_19 -14.2(17) . . . . ? 
Cu3 O_20 C1_20 N_20 -91.5(6) . . . . ? 
Cu3 O_20 C1_20 C2_20 87.6(6) . . . . ? 
C3_20 N_20 C1_20 O_20 6.1(13) . . . . ? 
C4_20 N_20 C1_20 O_20 -179.8(13) . . . . ? 
C3_20 N_20 C1_20 C2_20 -173.1(13) . . . . ? 
C4_20 N_20 C1_20 C2_20 1.1(13) . . . . ? 
Cu5 O_21 C1_21 N_21 -171.8(12) . . . . ? 
Cu5 O_21 C1_21 C2_21 7.3(12) . . . . ? 
C3_21 N_21 C1_21 O_21 -0.9(17) . . . . ? 
C4_21 N_21 C1_21 O_21 -174.5(16) . . . . ? 
C3_21 N_21 C1_21 C2_21 180.0(17) . . . . ? 
C4_21 N_21 C1_21 C2_21 6.4(16) . . . . ? 
Cu6 O_22 C1_22 N_22 103.9(5) . . . . ? 
Cu6 O_22 C1_22 C2_22 -77.0(5) . . . . ? 
C3_22 N_22 C1_22 O_22 -4.3(10) . . . . ? 
C4_22 N_22 C1_22 O_22 178.6(10) . . . . ? 
C3_22 N_22 C1_22 C2_22 176.5(10) . . . . ? 
C4_22 N_22 C1_22 C2_22 -0.5(10) . . . . ? 
Cu8 O_23 C1_23 N_23 97.2(6) . . . . ? 
Cu8 O_23 C1_23 C2_23 -83.7(6) . . . . ? 
C3_23 N_23 C1_23 O_23 -2.6(12) . . . . ? 
C4_23 N_23 C1_23 O_23 -171.9(11) . . . . ? 
C3_23 N_23 C1_23 C2_23 178.3(12) . . . . ? 
C4_23 N_23 C1_23 C2_23 9.0(11) . . . . ? 
Cu12 OA_24 C1A_24 NA_24 -93.4(10) . . . . ? 
Cu12 OA_24 C1A_24 C2A_24 85.7(10) . . . . ? 
C3A_24 NA_24 C1A_24 OA_24 11(3) . . . . ? 
C4A_24 NA_24 C1A_24 OA_24 -179.5(18) . . . . ? 
C3A_24 NA_24 C1A_24 C2A_24 -168(3) . . . . ? 
C4A_24 NA_24 C1A_24 C2A_24 1.3(18) . . . . ? 
Cu12 OB_24 C1B_24 NB_24 98.8(14) . . . . ? 
Cu12 OB_24 C1B_24 C2B_24 -82.1(14) . . . . ? 
C4B_24 NB_24 C1B_24 OB_24 166(3) . . . . ? 
C3B_24 NB_24 C1B_24 OB_24 16.2(19) . . . . ? 
C4B_24 NB_24 C1B_24 C2B_24 -13(3) . . . . ? 
C3B_24 NB_24 C1B_24 C2B_24 -163.0(19) . . . . ? 
C4_25 N_25 C1_25 O_25 177(3) . . . . ? 
C3_25 N_25 C1_25 O_25 -1(2) . . . . ? 
C4_25 N_25 C1_25 C2_25 -2(3) . . . . ? 
C3_25 N_25 C1_25 C2_25 180(2) . . . . ? 
C4_26 N_26 C1_26 O_26 -174.2(16) . . . . ? 
C3_26 N_26 C1_26 O_26 4.6(15) . . . . ? 
C4_26 N_26 C1_26 C2_26 6.7(16) . . . . ? 
C3_26 N_26 C1_26 C2_26 -174.6(15) . . . . ? 
C3_27 N_27 C1_27 O_27 4.5(16) . . . . ? 
C4_27 N_27 C1_27 O_27 -179.0(17) . . . . ? 
C3_27 N_27 C1_27 C2_27 -174.6(16) . . . . ? 
C4_27 N_27 C1_27 C2_27 1.9(17) . . . . ? 
  
_refine_diff_density_max    1.253 
_refine_diff_density_min   -1.235 
_refine_diff_density_rms    0.116 
  
_shelx_res_file 
; 
TITL eric029 in P-1 
    eric029_sq.res 
    created by SHELXL-2017/1 at 15:12:35 on 13-Nov-2017 
CELL 1.54178  25.48770  25.72610  25.87440  71.2054  61.6771  61.2609 
ZERR    1.00   0.00080   0.00080   0.00080   0.0018   0.0017   0.0016 
LATT  1 
SFAC C H CU O N 
UNIT 320 350 24 150 18 
LIST 4 
TEMP -73.140 
L.S. 20 
BOND $H 
ACTA 
FMAP 2 
PLAN 10 
  
SIMU 0.002 
RIGU 0.002 
SADI CU10 O2A_18 CU10 O2B_18 
  
CONF 
ABIN 
WGHT    0.194700 
FVAR       0.04893   0.50468   0.55770   0.52649 
CU1   3    0.552969    0.349268    0.251539    11.00000    0.08956    0.05921 = 
         0.08960   -0.01916   -0.05932   -0.00400 
CU2   3    0.582862    0.293969    0.165435    11.00000    0.09825    0.06685 = 
         0.09312   -0.02613   -0.06352    0.00141 
CU3   3    0.382105    0.696945    0.231223    11.00000    0.04901    0.06079 = 
         0.06429   -0.01410   -0.02930   -0.01150 
CU4   3    0.344482    0.761312    0.143282    11.00000    0.05003    0.06121 = 
         0.06774   -0.01217   -0.03138   -0.01088 
CU5   3    0.314122    0.849235    0.487414    11.00000    0.04766    0.04261 = 
         0.09312   -0.01464   -0.04092   -0.00935 
CU6   3    0.254429    0.965889    0.488414    11.00000    0.04840    0.04415 = 
         0.09410   -0.01469   -0.04260   -0.00898 
CU7   3    0.118381    0.654585    0.557127    11.00000    0.04176    0.05515 = 
         0.08086   -0.01030   -0.03249   -0.01138 
CU8   3   -0.005922    0.706144    0.575692    11.00000    0.04276    0.05088 = 
         0.08078   -0.00459   -0.03205   -0.01392 
CU9   3    0.238679    0.448744    0.815939    11.00000    0.04930    0.09066 = 
         0.06389   -0.00714   -0.02437   -0.01757 
CU10  3    0.153188    0.439312    0.924353    11.00000    0.04997    0.10571 = 
         0.06446   -0.00288   -0.02341   -0.01103 
CU11  3    0.297635    0.303497    0.571200    11.00000    0.05760    0.05163 = 
         0.12077   -0.01156   -0.04596   -0.02189 
CU12  3    0.236257    0.235544    0.590890    11.00000    0.06100    0.05206 = 
         0.13162   -0.00408   -0.05570   -0.02270 
RESI lind 1 
O1    4    0.482103    0.321537    0.290523    11.00000    0.09146    0.06106 = 
         0.09589   -0.01872   -0.05881   -0.00767 
O2    4    0.509550    0.268772    0.221014    11.00000    0.09649    0.06560 = 
         0.09909   -0.02224   -0.06094   -0.00429 
O3    4    0.330549    0.292481    0.487759    11.00000    0.06531    0.05489 = 
         0.12163   -0.01211   -0.04851   -0.01906 
O4    4    0.270595    0.241396    0.505170    11.00000    0.06812    0.05461 = 
         0.12889   -0.00845   -0.05259   -0.01976 
C1    1    0.476166    0.287899    0.268991    11.00000    0.09244    0.06361 = 
         0.10132   -0.02022   -0.05961   -0.00823 
C2    1    0.423320    0.264214    0.312090    11.00000    0.08981    0.06503 = 
         0.11041   -0.01934   -0.05927   -0.01218 
C3    1    0.407739    0.230002    0.294028    11.00000    0.09159    0.06828 = 
         0.11554   -0.02024   -0.05858   -0.01459 
AFIX  43 
H3    2    0.430324    0.220025    0.254714    11.00000   -1.20000 
AFIX   0 
C4    1    0.359311    0.210842    0.333739    11.00000    0.09302    0.07093 = 
         0.12083   -0.02074   -0.05690   -0.01740 
C5    1    0.328347    0.219873    0.390445    11.00000    0.08657    0.06688 = 
         0.12055   -0.01784   -0.05678   -0.01682 
AFIX  43 
H5    2    0.297380    0.203141    0.417063    11.00000   -1.20000 
AFIX   0 
C6    1    0.343108    0.255810    0.410419    11.00000    0.08107    0.06245 = 
         0.11950   -0.01555   -0.05629   -0.01568 
C7    1    0.390265    0.276896    0.368843    11.00000    0.08505    0.06350 = 
         0.11396   -0.01775   -0.05795   -0.01417 
AFIX  43 
H7    2    0.399967    0.301500    0.380667    11.00000   -1.20000 
AFIX   0 
C8    1    0.311770    0.262204    0.473107    11.00000    0.07069    0.05684 = 
         0.12272   -0.01233   -0.05295   -0.01846 
O5    4    0.349318    0.173562    0.311697    11.00000    0.09951    0.07680 = 
         0.12553   -0.02407   -0.05480   -0.02189 
C9    1    0.306536    0.142222    0.355563    11.00000    0.10156    0.08022 = 
         0.12835   -0.02466   -0.05326   -0.02338 
AFIX  23 
H9A   2    0.261248    0.171438    0.371314    11.00000   -1.20000 
H9B   2    0.320688    0.120687    0.388988    11.00000   -1.20000 
AFIX   0 
C10   1    0.310831    0.097724    0.324203    11.00000    0.10349    0.08212 = 
         0.12986   -0.02544   -0.05287   -0.02342 
AFIX  23 
H10A  2    0.280371    0.078266    0.351752    11.00000   -1.20000 
H10B  2    0.298439    0.119286    0.289797    11.00000   -1.20000 
AFIX   0 
C11   1    0.377790    0.051898    0.304136    11.00000    0.10986    0.08542 = 
         0.13401   -0.02481   -0.04620   -0.02035 
AFIX 137 
H11A  2    0.378957    0.020648    0.289274    11.00000   -1.50000 
H11B  2    0.391905    0.034227    0.337381    11.00000   -1.50000 
H11C  2    0.406841    0.070477    0.272467    11.00000   -1.50000 
AFIX   0 
  
RESI lind 2 
O1    4    0.503957    0.418631    0.208099    11.00000    0.08894    0.06095 = 
         0.08788   -0.02025   -0.05811   -0.00363 
O2    4    0.523549    0.369341    0.138904    11.00000    0.09364    0.06500 = 
         0.09072   -0.02494   -0.05981   -0.00160 
O3    4    0.393318    0.631920    0.196658    11.00000    0.05602    0.06157 = 
         0.06869   -0.01458   -0.03269   -0.01103 
O4    4    0.367791    0.686256    0.118848    11.00000    0.05651    0.06305 = 
         0.07036   -0.01443   -0.03311   -0.00975 
C1    1    0.498657    0.415893    0.162350    11.00000    0.08742    0.06359 = 
         0.08693   -0.02210   -0.05643   -0.00402 
C2    1    0.459390    0.473554    0.136075    11.00000    0.08034    0.06473 = 
         0.08209   -0.02043   -0.05105   -0.00631 
C3    1    0.446690    0.473578    0.088673    11.00000    0.07880    0.06592 = 
         0.08128   -0.01970   -0.05010   -0.00723 
AFIX  43 
H3    2    0.461333    0.437201    0.074597    11.00000   -1.20000 
AFIX   0 
C4    1    0.412859    0.526934    0.063162    11.00000    0.07772    0.06705 = 
         0.08094   -0.01871   -0.04842   -0.00794 
C5    1    0.392299    0.580250    0.082547    11.00000    0.07382    0.06585 = 
         0.07905   -0.01821   -0.04493   -0.00846 
AFIX  43 
H5    2    0.368917    0.616746    0.064316    11.00000   -1.20000 
AFIX   0 
C6    1    0.405787    0.580790    0.129088    11.00000    0.06995    0.06451 = 
         0.07682   -0.01811   -0.04217   -0.00903 
C7    1    0.437981    0.526927    0.156262    11.00000    0.07510    0.06441 = 
         0.07909   -0.01947   -0.04665   -0.00771 
AFIX  43 
H7    2    0.445509    0.526461    0.189052    11.00000   -1.20000 
AFIX   0 
C8    1    0.388000    0.638266    0.149151    11.00000    0.06074    0.06303 = 
         0.07169   -0.01576   -0.03580   -0.01005 
O5    4    0.396424    0.532673    0.018284    11.00000    0.08196    0.06995 = 
         0.08237   -0.01861   -0.04942   -0.00826 
C9    1    0.412111    0.478994   -0.001715    11.00000    0.08473    0.07174 = 
         0.08401   -0.01860   -0.04862   -0.00962 
AFIX  23 
H9A   2    0.394882    0.452016    0.032223    11.00000   -1.20000 
H9B   2    0.459750    0.457910   -0.020207    11.00000   -1.20000 
AFIX   0 
C10   1    0.382898    0.495374   -0.045388    11.00000    0.08669    0.07370 = 
         0.08504   -0.01857   -0.04846   -0.01131 
AFIX  23 
H10A  2    0.401458    0.521101   -0.079962    11.00000   -1.20000 
H10B  2    0.335506    0.518030   -0.027305    11.00000   -1.20000 
AFIX   0 
C11   1    0.396717    0.438260   -0.065511    11.00000    0.09138    0.07750 = 
         0.08837   -0.01904   -0.04542   -0.01719 
AFIX 137 
H11A  2    0.385341    0.449020   -0.099880    11.00000   -1.50000 
H11B  2    0.370744    0.417150   -0.033185    11.00000   -1.50000 
H11C  2    0.442855    0.412293   -0.076263    11.00000   -1.50000 
AFIX   0 
RESI lind 3 
O1    4    0.626135    0.370130    0.202967    11.00000    0.09580    0.06806 = 
         0.09101   -0.02040   -0.05783   -0.00436 
O2    4    0.649234    0.328394    0.125531    11.00000    0.10152    0.07253 = 
         0.09358   -0.02276   -0.05827   -0.00047 
O3    4    0.753041    0.489532    0.162951    11.00000    0.10902    0.08948 = 
         0.09058   -0.02028   -0.05124   -0.01640 
O4    4    0.828065    0.495550    0.071395    11.00000    0.11050    0.09026 = 
         0.09070   -0.02014   -0.05093   -0.01551 
C1    1    0.659258    0.358557    0.150737    11.00000    0.10269    0.07492 = 
         0.09239   -0.02186   -0.05589   -0.00485 
AFIX  66 
C2    1    0.713860    0.378027    0.113486    11.00000    0.11157    0.08448 = 
         0.09414   -0.02253   -0.04966   -0.01123 
C3    1    0.750401    0.361032    0.056852    11.00000    0.11988    0.09128 = 
         0.09664   -0.02435   -0.04434   -0.01505 
AFIX  43 
H3    2    0.742155    0.335395    0.044860    11.00000   -1.20000 
AFIX  65 
C4    1    0.799006    0.381548    0.017766    11.00000    0.12683    0.09768 = 
         0.09920   -0.02522   -0.03991   -0.01824 
C5    1    0.811071    0.419059    0.035313    11.00000    0.12231    0.09433 = 
         0.09649   -0.02300   -0.04205   -0.01616 
AFIX  43 
H5    2    0.844290    0.433081    0.008599    11.00000   -1.20000 
AFIX  65 
C6    1    0.774530    0.436055    0.091946    11.00000    0.11520    0.09023 = 
         0.09316   -0.02229   -0.04791   -0.01524 
C7    1    0.725925    0.415539    0.131033    11.00000    0.11258    0.08719 = 
         0.09293   -0.02219   -0.04962   -0.01323 
AFIX  43 
H7    2    0.700951    0.427155    0.169739    11.00000   -1.20000 
  
AFIX   0 
C8    1    0.784889    0.475934    0.111587    11.00000    0.11154    0.09016 = 
         0.09143   -0.02045   -0.04988   -0.01514 
  
SAME O5_2 C9_2 C10_2 C11_2 
O5    4    0.831366    0.372104   -0.040852    11.00000    0.13757    0.10756 = 
         0.10414   -0.02656   -0.03370   -0.02057 
C9    1    0.808636    0.351605   -0.070019    11.00000    0.14144    0.11392 = 
         0.10738   -0.02721   -0.03377   -0.02227 
AFIX  23 
H9A   2    0.761453    0.375239   -0.058929    11.00000   -1.20000 
H9B   2    0.814831    0.309470   -0.053944    11.00000   -1.20000 
AFIX   0 
C10   1    0.839707    0.355312   -0.135165    11.00000    0.14462    0.11885 = 
         0.10996   -0.02574   -0.03238   -0.02148 
AFIX  23 
H10A  2    0.878145    0.317636   -0.146135    11.00000   -1.20000 
H10B  2    0.855203    0.388080   -0.150470    11.00000   -1.20000 
AFIX   0 
C11   1    0.794933    0.366319   -0.166385    11.00000    0.14785    0.12649 = 
         0.11434   -0.02658   -0.03359   -0.02260 
AFIX 137 
H11A  2    0.818177    0.371165   -0.209380    11.00000   -1.50000 
H11B  2    0.755694    0.402565   -0.154505    11.00000   -1.50000 
H11C  2    0.782905    0.332116   -0.154809    11.00000   -1.50000 
AFIX   0 
RESI lind 4 
O1    4    0.363103    0.773504    0.249817    11.00000    0.05328    0.06249 = 
         0.07124   -0.01513   -0.03123   -0.01351 
O2    4    0.323800    0.830084    0.178639    11.00000    0.05351    0.06244 = 
         0.07245   -0.01276   -0.03215   -0.01195 
O3    4    0.322189    0.868684    0.405617    11.00000    0.05273    0.04914 = 
         0.09356   -0.01607   -0.03947   -0.01039 
O4    4    0.270804    0.968123    0.405138    11.00000    0.05313    0.04877 = 
         0.09391   -0.01583   -0.04116   -0.01120 
C1    1    0.335419    0.821827    0.223071    11.00000    0.05544    0.06267 = 
         0.07580   -0.01445   -0.03360   -0.01354 
C2    1    0.313681    0.880502    0.245796    11.00000    0.06043    0.06237 = 
         0.08424   -0.01453   -0.03699   -0.01508 
C3    1    0.287372    0.934676    0.217484    11.00000    0.06690    0.06368 = 
         0.08879   -0.01388   -0.03953   -0.01549 
AFIX  43 
H3    2    0.284349    0.937991    0.181258    11.00000   -1.20000 
AFIX   0 
C4    1    0.264738    0.985703    0.243183    11.00000    0.07303    0.06473 = 
         0.09333   -0.01382   -0.04127   -0.01472 
C5    1    0.271129    0.982244    0.293519    11.00000    0.06680    0.06195 = 
         0.09270   -0.01407   -0.04066   -0.01458 
AFIX  43 
H5    2    0.258376    1.017415    0.308657    11.00000   -1.20000 
AFIX   0 
C6    1    0.296607    0.926399    0.322250    11.00000    0.05989    0.05837 = 
         0.09102   -0.01495   -0.04014   -0.01465 
C7    1    0.318693    0.875906    0.299287    11.00000    0.05904    0.06035 = 
         0.08739   -0.01494   -0.03923   -0.01568 
AFIX  43 
H7    2    0.337320    0.837878    0.318918    11.00000   -1.20000 
AFIX   0 
C8    1    0.296415    0.921501    0.382480    11.00000    0.05455    0.05182 = 
         0.09277   -0.01607   -0.04082   -0.01317 
O5    4    0.237536    1.040892    0.212683    11.00000    0.08405    0.06872 = 
         0.09941   -0.01223   -0.04216   -0.01249 
C9    1    0.196088    1.095167    0.247253    11.00000    0.10044    0.07136 = 
         0.10969   -0.01439   -0.04416   -0.01003 
  
RESI lind 5 
O1    4    0.292136    0.708324    0.277028    11.00000    0.05006    0.06432 = 
         0.06778   -0.01309   -0.02816   -0.01196 
O2    4    0.260754    0.756405    0.202089    11.00000    0.05061    0.06305 = 
         0.07011   -0.01321   -0.03075   -0.01283 
O3    4    0.134957    0.678592    0.473154    11.00000    0.04483    0.05810 = 
         0.08092   -0.01032   -0.02960   -0.01540 
O4    4    0.030155    0.718881    0.488138    11.00000    0.04600    0.05517 = 
         0.08172   -0.00764   -0.02992   -0.01605 
C1    1    0.251038    0.732705    0.254310    11.00000    0.05080    0.06389 = 
         0.07067   -0.01462   -0.02969   -0.01430 
C2    1    0.184587    0.734219    0.293881    11.00000    0.05103    0.06630 = 
         0.07472   -0.01435   -0.03102   -0.01668 
C3    1    0.139018    0.748851    0.270025    11.00000    0.05234    0.07301 = 
         0.07778   -0.01474   -0.03256   -0.01624 
AFIX  43 
H3    2    0.149431    0.759476    0.228658    11.00000   -1.20000 
AFIX   0 
C4    1    0.079404    0.747539    0.307369    11.00000    0.05312    0.07784 = 
         0.08134   -0.01424   -0.03316   -0.01767 
C5    1    0.060805    0.736727    0.366998    11.00000    0.05106    0.07070 = 
         0.08044   -0.01317   -0.03143   -0.01907 
AFIX  43 
H5    2    0.017615    0.740552    0.392169    11.00000   -1.20000 
AFIX   0 
C6    1    0.107363    0.719657    0.390570    11.00000    0.04900    0.06346 = 
         0.07897   -0.01239   -0.03042   -0.01926 
C7    1    0.167697    0.718650    0.353859    11.00000    0.04958    0.06339 = 
         0.07611   -0.01368   -0.03053   -0.01833 
AFIX  43 
H7    2    0.198797    0.706893    0.370169    11.00000   -1.20000 
AFIX   0 
C8    1    0.088804    0.704592    0.456120    11.00000    0.04667    0.05819 = 
         0.08059   -0.01022   -0.02971   -0.01747 
O5    4    0.039390    0.762179    0.278400    11.00000    0.05636    0.09012 = 
         0.08586   -0.01377   -0.03535   -0.01654 
C9    1   -0.023072    0.758178    0.314738    11.00000    0.05794    0.09519 = 
         0.08890   -0.01377   -0.03598   -0.01673 
AFIX  23 
H9A   2   -0.052003    0.790994    0.339894    11.00000   -1.20000 
H9B   2   -0.017821    0.719595    0.340598    11.00000   -1.20000 
AFIX   0 
C10   1   -0.051243    0.763137    0.271861    11.00000    0.06369    0.10918 = 
         0.09628   -0.01694   -0.04048   -0.01550 
RESI lind 6 
O1    4    0.468818    0.692377    0.176262    11.00000    0.05088    0.06767 = 
         0.06627   -0.01025   -0.02766   -0.01068 
O2    4    0.437048    0.750582    0.103340    11.00000    0.05217    0.06860 = 
         0.06770   -0.00941   -0.02907   -0.01045 
O3    4    0.696513    0.611210    0.150085    11.00000    0.05277    0.09372 = 
         0.06581   -0.00557   -0.02445   -0.01583 
O4    4    0.770931    0.618905    0.057152    11.00000    0.05285    0.09431 = 
         0.06664   -0.00475   -0.02399   -0.01315 
C1    1    0.479469    0.719199    0.125452    11.00000    0.05240    0.07334 = 
         0.06653   -0.00931   -0.02863   -0.01190 
C2    1    0.549541    0.711854    0.085706    11.00000    0.05479    0.08472 = 
         0.06780   -0.00673   -0.02733   -0.01378 
C3    1    0.563638    0.740759    0.028026    11.00000    0.05865    0.09420 = 
         0.06980   -0.00350   -0.02603   -0.01284 
AFIX  43 
H3    2    0.529843    0.767111    0.014257    11.00000   -1.20000 
AFIX   0 
C4    1    0.626643    0.730587   -0.008232    11.00000    0.06372    0.10287 = 
         0.07253   -0.00018   -0.02343   -0.01199 
C5    1    0.675890    0.695356    0.014216    11.00000    0.06075    0.09876 = 
         0.07016   -0.00242   -0.02363   -0.01264 
AFIX  43 
H5    2    0.719890    0.688545   -0.010780    11.00000   -1.20000 
AFIX   0 
C6    1    0.659534    0.670838    0.072917    11.00000    0.05624    0.09351 = 
         0.06782   -0.00512   -0.02551   -0.01426 
C7    1    0.595437    0.677840    0.110022    11.00000    0.05511    0.08790 = 
         0.06739   -0.00676   -0.02694   -0.01488 
AFIX  43 
H7    2    0.584256    0.659966    0.150001    11.00000   -1.20000 
AFIX   0 
C8    1    0.712992    0.631075    0.096389    11.00000    0.05384    0.09362 = 
         0.06655   -0.00537   -0.02441   -0.01468 
O5    4    0.639484    0.755089   -0.064985    11.00000    0.07290    0.11479 = 
         0.07815    0.00478   -0.02031   -0.01008 
C9    1    0.708751    0.739909   -0.108464    11.00000    0.07930    0.12176 = 
         0.08334    0.00575   -0.01789   -0.00971 
AFIX  23 
H9A   2    0.732200    0.752410   -0.096525    11.00000   -1.20000 
H9B   2    0.731572    0.696411   -0.111008    11.00000   -1.20000 
AFIX   0 
C10   1    0.704621    0.773626   -0.166346    11.00000    0.08428    0.12641 = 
         0.08700    0.00671   -0.01727   -0.00922 
AFIX  23 
H10A  2    0.684376    0.817237   -0.164694    11.00000   -1.20000 
H10B  2    0.678977    0.762943   -0.177252    11.00000   -1.20000 
AFIX   0 
C11   1    0.778804    0.753550   -0.212889    11.00000    0.09597    0.13584 = 
         0.09868    0.00573   -0.01280   -0.00761 
AFIX 137 
H11A  2    0.805109    0.756956   -0.197181    11.00000   -1.50000 
H11B  2    0.781071    0.779441   -0.250510    11.00000   -1.50000 
H11C  2    0.795377    0.712037   -0.219301    11.00000   -1.50000 
AFIX   0 
  
RESI lind 7 
O1    4    0.392046    0.863387    0.463558    11.00000    0.04875    0.04785 = 
         0.10020   -0.01368   -0.04225   -0.01078 
O2    4    0.340843    0.963141    0.464161    11.00000    0.05046    0.04813 = 
         0.10032   -0.01362   -0.04193   -0.01172 
O3    4    0.626185    0.768040    0.423405    11.00000    0.05674    0.05778 = 
         0.12775   -0.00788   -0.04791   -0.02444 
O4    4    0.677323    0.826195    0.409817    11.00000    0.05519    0.05970 = 
         0.12840   -0.00661   -0.05053   -0.02216 
C1    1    0.390680    0.913621    0.457109    11.00000    0.05098    0.05002 = 
         0.10469   -0.01338   -0.04438   -0.01356 
C2    1    0.453848    0.918593    0.441582    11.00000    0.05448    0.05432 = 
         0.11468   -0.01241   -0.04724   -0.01729 
C3    1    0.455521    0.974351    0.432700    11.00000    0.05905    0.05669 = 
         0.12073   -0.01197   -0.04704   -0.01879 
AFIX  43 
H3    2    0.416961    1.009401    0.436348    11.00000   -1.20000 
AFIX   0 
C4    1    0.512562    0.979066    0.418689    11.00000    0.06257    0.05953 = 
         0.12746   -0.01133   -0.04611   -0.02043 
C5    1    0.569630    0.927654    0.413374    11.00000    0.05974    0.05897 = 
         0.12618   -0.01042   -0.04712   -0.02102 
AFIX  43 
H5    2    0.608787    0.930584    0.404806    11.00000   -1.20000 
AFIX   0 
C6    1    0.568229    0.870835    0.420987    11.00000    0.05654    0.05815 = 
         0.12416   -0.00996   -0.04839   -0.02114 
C7    1    0.508903    0.868336    0.435544    11.00000    0.05502    0.05599 = 
         0.11928   -0.01155   -0.04844   -0.01936 
AFIX  43 
H7    2    0.507244    0.830690    0.441291    11.00000   -1.20000 
AFIX   0 
C8    1    0.627306    0.817166    0.419413    11.00000    0.05620    0.05878 = 
         0.12676   -0.00829   -0.04922   -0.02257 
O5    4    0.524809    1.028176    0.409678    11.00000    0.06909    0.06225 = 
         0.13509   -0.01125   -0.04317   -0.02111 
C9    1    0.470366    1.080151    0.423429    11.00000    0.07195    0.06487 = 
         0.13801   -0.01105   -0.04454   -0.01915 
AFIX  23 
H9A   2    0.439862    1.075335    0.464710    11.00000   -1.20000 
H9B   2    0.447847    1.092361    0.396467    11.00000   -1.20000 
AFIX   0 
C10   1    0.496632    1.125639    0.415280    11.00000    0.07362    0.06497 = 
         0.13982   -0.01116   -0.04582   -0.01894 
AFIX  23 
H10A  2    0.458589    1.163342    0.427130    11.00000   -1.20000 
H10B  2    0.516694    1.111626    0.444568    11.00000   -1.20000 
AFIX   0 
C11   1    0.540078    1.140226    0.362461    11.00000    0.08131    0.06863 = 
         0.14475   -0.00596   -0.04162   -0.01380 
AFIX 137 
H11A  2    0.517040    1.169361    0.337162    11.00000   -1.50000 
H11B  2    0.571672    1.104224    0.342906    11.00000   -1.50000 
H11C  2    0.562674    1.157552    0.369441    11.00000   -1.50000 
AFIX   0 
RESI lind 8 
O1    4    0.300275    0.843142    0.568906    11.00000    0.05674    0.04782 = 
         0.09457   -0.01128   -0.04153   -0.00856 
O2    4    0.246114    0.942927    0.571100    11.00000    0.05640    0.04786 = 
         0.09509   -0.01253   -0.04248   -0.00843 
O3    4    0.389938    0.729498    0.723259    11.00000    0.08681    0.06932 = 
         0.09434   -0.01768   -0.05758   -0.00435 
O4    4    0.358931    0.774102    0.799360    11.00000    0.08676    0.07011 = 
         0.09496   -0.01869   -0.05582   -0.00340 
C1    1    0.269892    0.890079    0.594623    11.00000    0.06056    0.05119 = 
         0.09492   -0.01258   -0.04525   -0.00933 
C2    1    0.266774    0.883626    0.654896    11.00000    0.07043    0.05860 = 
         0.09615   -0.01403   -0.04960   -0.00991 
C3    1    0.224141    0.929407    0.689733    11.00000    0.07706    0.06352 = 
         0.09836   -0.01451   -0.04985   -0.00869 
AFIX  43 
H3    2    0.194992    0.964480    0.675504    11.00000   -1.20000 
AFIX   0 
C4    1    0.222873    0.925407    0.744855    11.00000    0.08326    0.06823 = 
         0.09976   -0.01509   -0.05070   -0.00771 
C5    1    0.267565    0.873741    0.764268    11.00000    0.08192    0.06664 = 
         0.09814   -0.01621   -0.05200   -0.00832 
AFIX  43 
H5    2    0.268468    0.870954    0.801374    11.00000   -1.20000 
AFIX   0 
C6    1    0.309308    0.827904    0.731409    11.00000    0.08029    0.06506 = 
         0.09606   -0.01669   -0.05358   -0.00785 
C7    1    0.309271    0.831823    0.676673    11.00000    0.07486    0.06142 = 
         0.09597   -0.01574   -0.05240   -0.00992 
AFIX  43 
H7    2    0.338088    0.799357    0.653836    11.00000   -1.20000 
AFIX   0 
C8    1    0.356525    0.772686    0.752281    11.00000    0.08476    0.06835 = 
         0.09485   -0.01781   -0.05537   -0.00520 
O5    4    0.177812    0.972067    0.776155    11.00000    0.09102    0.07379 = 
         0.10277   -0.01525   -0.04923   -0.00566 
C9    1    0.183557    0.974052    0.827930    11.00000    0.09752    0.07972 = 
         0.10485   -0.01681   -0.04901   -0.00412 
AFIX  23 
H9A   2    0.227234    0.971478    0.818133    11.00000   -1.20000 
H9B   2    0.176127    0.940569    0.858539    11.00000   -1.20000 
AFIX   0 
C10   1    0.130693    1.034990    0.850147    11.00000    0.10385    0.08477 = 
         0.10832   -0.01643   -0.04621   -0.00169 
AFIX  23 
H10A  2    0.086800    1.034653    0.868376    11.00000   -1.20000 
H10B  2    0.132306    1.068156    0.817483    11.00000   -1.20000 
AFIX   0 
C11   1    0.149660    1.040475    0.897538    11.00000    0.11496    0.09482 = 
         0.11417   -0.02045   -0.04750   -0.00190 
AFIX 137 
H11A  2    0.187775    1.004848    0.900625    11.00000   -1.50000 
H11B  2    0.113337    1.043986    0.936049    11.00000   -1.50000 
H11C  2    0.159631    1.075991    0.885332    11.00000   -1.50000 
AFIX   0 
RESI lind 9 
O1    4    0.223964    0.857832    0.512798    11.00000    0.04892    0.04675 = 
         0.09516   -0.01323   -0.03839   -0.00977 
O2    4    0.173993    0.955774    0.513654    11.00000    0.04859    0.04774 = 
         0.09483   -0.01282   -0.04058   -0.00982 
O3    4    0.106203    0.734765    0.562303    11.00000    0.04533    0.05622 = 
         0.08378   -0.01086   -0.03189   -0.01349 
O4    4    0.000747    0.778600    0.577227    11.00000    0.04481    0.05251 = 
         0.08351   -0.00793   -0.03365   -0.01344 
C1    1    0.175557    0.903966    0.520419    11.00000    0.04820    0.04888 = 
         0.09379   -0.01306   -0.03908   -0.01045 
C2    1    0.111524    0.899098    0.542304    11.00000    0.04779    0.05275 = 
         0.09147   -0.01358   -0.03786   -0.01179 
C3    1    0.052818    0.950046    0.558007    11.00000    0.04854    0.05450 = 
         0.09196   -0.01453   -0.03629   -0.01260 
AFIX  43 
H3    2    0.052864    0.988254    0.553064    11.00000   -1.20000 
AFIX   0 
C4    1   -0.005771    0.942265    0.581237    11.00000    0.04935    0.05660 = 
         0.09276   -0.01428   -0.03396   -0.01305 
C5    1   -0.004242    0.885662    0.586078    11.00000    0.04840    0.05635 = 
         0.08996   -0.01382   -0.03511   -0.01352 
AFIX  43 
H5    2   -0.043903    0.880693    0.602106    11.00000   -1.20000 
AFIX   0 
C6    1    0.052387    0.838090    0.568445    11.00000    0.04722    0.05504 = 
         0.08720   -0.01318   -0.03628   -0.01342 
C7    1    0.111117    0.843599    0.546135    11.00000    0.04756    0.05361 = 
         0.08941   -0.01295   -0.03644   -0.01244 
AFIX  43 
H7    2    0.150771    0.810048    0.533542    11.00000   -1.20000 
AFIX   0 
C8    1    0.055336    0.778249    0.568925    11.00000    0.04600    0.05504 = 
         0.08441   -0.01079   -0.03410   -0.01392 
O5    4   -0.066593    0.986954    0.598439    11.00000    0.05132    0.05919 = 
         0.09652   -0.01525   -0.03087   -0.01213 
C9    1   -0.070896    1.046394    0.594690    11.00000    0.05312    0.06008 = 
         0.09801   -0.01670   -0.03022   -0.01111 
AFIX  23 
H9A   2   -0.050463    1.061937    0.553107    11.00000   -1.20000 
H9B   2   -0.049194    1.045883    0.618128    11.00000   -1.20000 
AFIX   0 
C10   1   -0.143208    1.084438    0.619965    11.00000    0.05393    0.06080 = 
         0.09901   -0.01733   -0.02962   -0.01114 
AFIX  23 
H10A  2   -0.163161    1.068207    0.661380    11.00000   -1.20000 
H10B  2   -0.164472    1.084042    0.596586    11.00000   -1.20000 
AFIX   0 
C11   1   -0.152472    1.149519    0.617495    11.00000    0.05954    0.06069 = 
         0.10284   -0.01831   -0.02645   -0.00888 
AFIX 137 
H11A  2   -0.144573    1.169290    0.576795    11.00000   -1.50000 
H11B  2   -0.121789    1.148594    0.630730    11.00000   -1.50000 
H11C  2   -0.196881    1.171601    0.643408    11.00000   -1.50000 
AFIX   0 
RESI lind 10 
O1    4    0.107696    0.584943    0.553938    11.00000    0.04697    0.05413 = 
         0.08883   -0.00698   -0.03261   -0.01204 
O2    4    0.001277    0.628192    0.571554    11.00000    0.04830    0.05238 = 
         0.09002   -0.00393   -0.03153   -0.01403 
O3    4    0.218895    0.367789    0.564830    11.00000    0.05939    0.05216 = 
         0.12244   -0.00856   -0.04432   -0.02024 
O4    4    0.162478    0.313135    0.587214    11.00000    0.06125    0.05167 = 
         0.12719   -0.00477   -0.04994   -0.01999 
C1    1    0.056058    0.583547    0.562161    11.00000    0.05026    0.05468 = 
         0.09504   -0.00424   -0.03409   -0.01371 
C2    1    0.056012    0.523037    0.566302    11.00000    0.05563    0.05601 = 
         0.10588   -0.00282   -0.03730   -0.01596 
C3    1    0.001217    0.519168    0.571754    11.00000    0.05792    0.05970 = 
         0.11267   -0.00075   -0.03871   -0.01734 
AFIX  43 
H3    2   -0.036427    0.554275    0.571810    11.00000   -1.20000 
AFIX   0 
C4    1    0.001931    0.464349    0.577045    11.00000    0.06130    0.06328 = 
         0.11951    0.00090   -0.03915   -0.01978 
C5    1    0.056071    0.412962    0.578546    11.00000    0.05961    0.05921 = 
         0.11753   -0.00166   -0.04175   -0.02009 
AFIX  43 
H5    2    0.055582    0.374874    0.583855    11.00000   -1.20000 
AFIX   0 
C6    1    0.109597    0.417196    0.572429    11.00000    0.05914    0.05574 = 
         0.11650   -0.00364   -0.04264   -0.01862 
C7    1    0.109610    0.472956    0.565576    11.00000    0.05755    0.05576 = 
         0.11112   -0.00315   -0.03994   -0.01676 
AFIX  43 
H7    2    0.147613    0.475937    0.560331    11.00000   -1.20000 
AFIX   0 
C8    1    0.169535    0.362154    0.575040    11.00000    0.05988    0.05282 = 
         0.12178   -0.00579   -0.04574   -0.01971 
O5    4   -0.052009    0.460306    0.582156    11.00000    0.06483    0.07128 = 
         0.12712    0.00434   -0.03859   -0.02238 
C9    1   -0.065427    0.416617    0.599741    11.00000    0.07428    0.07557 = 
         0.14077    0.00434   -0.03375   -0.02427 
  
RESI lind 11 
  
EADP C2A_11 C2B_11 
EADP C3A_11 C3B_11 
EADP C4A_11 C4B_11 
EADP C5A_11 C5B_11 
EADP C6A_11 C6B_11 
EADP C7A_11 C7B_11 
  
EADP O5A_11 O5B_11 
EADP C9A_11 C9B_11 
EADP C10A_11 C10B_11 
EADP C11A_11 C11B_11 
  
O1    4    0.088041    0.637471    0.641863    11.00000    0.04588    0.06491 = 
         0.07956   -0.00800   -0.02922   -0.00947 
O2    4   -0.018148    0.679986    0.659855    11.00000    0.04861    0.06472 = 
         0.08072   -0.00268   -0.02815   -0.00875 
O3    4    0.162402    0.508702    0.799247    11.00000    0.05090    0.09183 = 
         0.06773   -0.00384   -0.02376   -0.01346 
O4    4    0.089024    0.497883    0.891385    11.00000    0.05320    0.09988 = 
         0.06857   -0.00146   -0.02219   -0.00869 
C1    1    0.031381    0.650602    0.673883    11.00000    0.04901    0.07233 = 
         0.07790   -0.00466   -0.02737   -0.01073 
PART 1 
AFIX  66 
C2A   1    0.019160    0.641451    0.740800    21.00000    0.05103    0.07894 = 
         0.07566   -0.00459   -0.02565   -0.01309 
C3A   1   -0.040810    0.671585    0.782373    21.00000    0.05153    0.07989 = 
         0.07574   -0.00467   -0.02498   -0.01374 
AFIX  43 
H3A   2   -0.073770    0.703059    0.769806    21.00000   -1.20000 
AFIX  65 
C4A   1   -0.052554    0.655670    0.842333    21.00000    0.05246    0.08162 = 
         0.07545   -0.00473   -0.02393   -0.01464 
C5A   1   -0.004328    0.609620    0.860721    21.00000    0.05201    0.08302 = 
         0.07421   -0.00460   -0.02471   -0.01408 
AFIX  43 
H5A   2   -0.012355    0.598742    0.901701    21.00000   -1.20000 
AFIX  65 
C6A   1    0.055642    0.579485    0.819148    21.00000    0.05182    0.08387 = 
         0.07362   -0.00428   -0.02493   -0.01338 
C7A   1    0.067387    0.595400    0.759188    21.00000    0.05136    0.08138 = 
         0.07449   -0.00447   -0.02547   -0.01340 
AFIX  43 
H7A   2    0.108374    0.574805    0.730775    21.00000   -1.20000 
AFIX  66 
  
PART 2 
C2B   1    0.011778    0.614047    0.737527   -21.00000    0.05103    0.07894 = 
         0.07566   -0.00459   -0.02565   -0.01309 
C3B   1   -0.050941    0.617504    0.773271   -21.00000    0.05153    0.07989 = 
         0.07574   -0.00467   -0.02498   -0.01374 
AFIX  43 
H3B   2   -0.084767    0.640991    0.758986   -21.00000   -1.20000 
AFIX  65 
C4B   1   -0.064169    0.586597    0.829917   -21.00000    0.05246    0.08162 = 
         0.07545   -0.00473   -0.02393   -0.01464 
C5B   1   -0.014678    0.552232    0.850819   -21.00000    0.05201    0.08302 = 
         0.07421   -0.00460   -0.02471   -0.01408 
AFIX  43 
H5B   2   -0.023719    0.531108    0.889534   -21.00000   -1.20000 
AFIX  65 
C6B   1    0.048041    0.548774    0.815075   -21.00000    0.05182    0.08387 = 
         0.07362   -0.00428   -0.02493   -0.01338 
C7B   1    0.061270    0.579681    0.758429   -21.00000    0.05136    0.08138 = 
         0.07449   -0.00447   -0.02547   -0.01340 
AFIX  43 
H7B   2    0.104136    0.577317    0.734000   -21.00000   -1.20000 
  
AFIX   0 
PART 0 
C8    1    0.107095    0.516736    0.836468    11.00000    0.05272    0.09072 = 
         0.07093   -0.00291   -0.02359   -0.01172 
PART 1 
SAME O5_2 C9_2 C10_2 C11_2 
O5A   4   -0.111247    0.686982    0.879377    21.00000    0.05440    0.08242 = 
         0.07695   -0.00501   -0.02138   -0.01559 
C9A   1   -0.118404    0.692018    0.934943    21.00000    0.05569    0.08217 = 
         0.07714   -0.00584   -0.02045   -0.01779 
AFIX  23 
H9A1  2   -0.145688    0.671091    0.966624    21.00000   -1.20000 
H9A2  2   -0.139475    0.734565    0.941272    21.00000   -1.20000 
AFIX   0 
C10A  1   -0.052464    0.664483    0.936164    21.00000    0.05730    0.08298 = 
         0.07820   -0.00555   -0.01889   -0.01842 
AFIX  23 
H10A  2   -0.047361    0.690573    0.952913    21.00000   -1.20000 
H10B  2   -0.018970    0.658835    0.895605    21.00000   -1.20000 
AFIX   0 
C11A  1   -0.045312    0.604719    0.974385    21.00000    0.05972    0.08422 = 
         0.07859   -0.00591   -0.01759   -0.01952 
AFIX  33 
H11A  2   -0.002283    0.585309    0.976149    21.00000   -1.50000 
H11B  2   -0.078650    0.610904    1.014393    21.00000   -1.50000 
H11C  2   -0.050379    0.579299    0.957327    21.00000   -1.50000 
AFIX   0 
  
PART 2 
SAME O5_2 C9_2 C10_2 C11_2 
O5B   4   -0.128656    0.593917    0.862162   -21.00000    0.05440    0.08242 = 
         0.07695   -0.00501   -0.02138   -0.01559 
C9B   1   -0.143430    0.553681    0.914418   -21.00000    0.05569    0.08217 = 
         0.07714   -0.00584   -0.02045   -0.01779 
AFIX  23 
H9B1  2   -0.178833    0.545253    0.917326   -21.00000   -1.20000 
H9B2  2   -0.160086    0.573976    0.948982   -21.00000   -1.20000 
AFIX   0 
C10B  1   -0.089575    0.496483    0.918534   -21.00000    0.05730    0.08298 = 
         0.07820   -0.00555   -0.01889   -0.01842 
AFIX  23 
H10C  2   -0.053171    0.491621    0.879409   -21.00000   -1.20000 
H10D  2   -0.103837    0.463542    0.928830   -21.00000   -1.20000 
AFIX   0 
C11B  1   -0.065762    0.491798    0.964388   -21.00000    0.05972    0.08422 = 
         0.07859   -0.00591   -0.01759   -0.01952 
AFIX  33 
H11D  2   -0.029969    0.452950    0.965344   -21.00000   -1.50000 
H11E  2   -0.050643    0.523756    0.953971   -21.00000   -1.50000 
H11F  2   -0.101324    0.495669    1.003407   -21.00000   -1.50000 
AFIX   0 
PART 0 
  
RESI lind 12 
O1    4    0.251964    0.297352    0.658352    11.00000    0.06233    0.06217 = 
         0.11971   -0.00919   -0.04514   -0.02260 
O2    4    0.204940    0.234964    0.675360    11.00000    0.06395    0.06308 = 
         0.12661   -0.00426   -0.04904   -0.02281 
O3    4    0.219708    0.385277    0.811130    11.00000    0.05403    0.09375 = 
         0.07305   -0.00644   -0.02447   -0.01998 
O4    4    0.147883    0.374926    0.903921    11.00000    0.05431    0.10280 = 
         0.07398   -0.00310   -0.02390   -0.01660 
C1    1    0.217899    0.267510    0.693083    11.00000    0.06374    0.06941 = 
         0.11888   -0.00595   -0.04426   -0.02466 
AFIX  66 
C2    1    0.189708    0.272444    0.757315    11.00000    0.06529    0.08340 = 
         0.11172   -0.00392   -0.03812   -0.02684 
C3    1    0.198716    0.311994    0.775224    11.00000    0.06304    0.08884 = 
         0.10284   -0.00410   -0.03572   -0.02647 
AFIX  43 
H3    2    0.225177    0.332808    0.747028    11.00000   -1.20000 
AFIX  65 
C4    1    0.169009    0.321091    0.834387    11.00000    0.06192    0.09448 = 
         0.09610   -0.00290   -0.03099   -0.02486 
C5    1    0.130293    0.290637    0.875643    11.00000    0.06798    0.09588 = 
         0.10423   -0.00181   -0.02987   -0.02749 
AFIX  43 
H5    2    0.109990    0.296854    0.916079    11.00000   -1.20000 
AFIX  65 
C6    1    0.121284    0.251086    0.857735    11.00000    0.07175    0.09560 = 
         0.11149   -0.00170   -0.02961   -0.03028 
C7    1    0.150991    0.241989    0.798571    11.00000    0.06927    0.09019 = 
         0.11232   -0.00270   -0.03379   -0.02947 
AFIX  43 
H7    2    0.144834    0.214958    0.786332    11.00000   -1.20000 
AFIX   0 
C8    1    0.180365    0.365207    0.851979    11.00000    0.05622    0.09705 = 
         0.08045   -0.00397   -0.02611   -0.02081 
O5    4    0.082690    0.220860    0.898176    11.00000    0.08657    0.11086 = 
         0.13191    0.00243   -0.02145   -0.04149 
  
RESI oxyg 13 
  
O1    4    0.220054    0.615730    0.538432    11.00000    0.03810    0.19303 = 
         0.11678   -0.05012   -0.03225   -0.00484 
RESI oxyg 14 
O17   4    0.617648    0.245642    0.093179    11.00000    0.20088    0.11606 = 
         0.10754   -0.03435   -0.09484   -0.03771 
RESI oxyg 15 
O2    4    0.319269    0.817278    0.069695    11.00000    0.07132    0.08442 = 
         0.07084   -0.00580   -0.04384   -0.00496 
RESI oxyg 16 
O1    4    0.335939    0.360822    0.574095    11.00000    0.09953    0.10856 = 
         0.19275   -0.05075   -0.03963   -0.06465 
RESI oxyg 17 
O1    4    0.308918    0.438344    0.723580    11.00000    0.07780    0.18898 = 
         0.07128   -0.01575   -0.01247   -0.07471 
RESI oxyg 18 
EADP O2A_18 O2B_18 
  
PART 1 
O2A   4    0.090704    0.456097    1.016897    41.00000    0.04845    0.09379 = 
         0.06771   -0.01797   -0.00959   -0.03217 
PART 2 
O2B   4    0.088208    0.412622    1.012464   -41.00000    0.04845    0.09379 = 
         0.06771   -0.01797   -0.00959   -0.03217 
  
RESI dma 19 
AFIX   6 
N     5    0.476096    0.419431    0.417853    11.00000    0.14106    0.11950 = 
         0.11269   -0.04003   -0.04614   -0.04098 
O     4    0.525316    0.388219    0.328583    11.00000    0.13610    0.11607 = 
         0.10719   -0.04320   -0.05128   -0.04318 
C1    1    0.503038    0.377110    0.383702    11.00000    0.13930    0.11833 = 
         0.11033   -0.04049   -0.04830   -0.04162 
C2    1    0.505745    0.315116    0.412165    11.00000    0.14370    0.11873 = 
         0.11240   -0.03786   -0.04661   -0.04065 
AFIX  33 
H2A   2    0.486384    0.314062    0.455294    11.00000   -1.50000 
H2B   2    0.481598    0.304541    0.399764    11.00000   -1.50000 
H2C   2    0.551011    0.286479    0.399924    11.00000   -1.50000 
AFIX   0 
C3    1    0.473735    0.476213    0.393168    11.00000    0.14184    0.11932 = 
         0.11709   -0.03796   -0.04435   -0.04144 
AFIX  33 
H3A   2    0.452348    0.501415    0.424656    11.00000   -1.50000 
H3B   2    0.517907    0.474577    0.369662    11.00000   -1.50000 
H3C   2    0.449270    0.493057    0.367617    11.00000   -1.50000 
AFIX   0 
C4    1    0.433562    0.419058    0.483655    11.00000    0.14425    0.12691 = 
         0.11585   -0.03660   -0.04270   -0.03595 
AFIX  33 
H4A   2    0.421000    0.456786    0.496395    11.00000   -1.50000 
H4B   2    0.394587    0.414399    0.490856    11.00000   -1.50000 
H4C   2    0.457746    0.385750    0.506029    11.00000   -1.50000 
AFIX   6 
  
RESI dma 20 
N     5    0.524185    0.568101    0.262489    11.00000    0.07690    0.09522 = 
         0.10111   -0.00840   -0.04982   -0.01790 
O     4    0.422488    0.635998    0.297817    11.00000    0.07328    0.09210 = 
         0.09379   -0.00741   -0.05428   -0.01849 
C1    1    0.481485    0.618401    0.286368    11.00000    0.07500    0.09371 = 
         0.09786   -0.00796   -0.05273   -0.01904 
C2    1    0.505049    0.654972    0.298888    11.00000    0.08015    0.09734 = 
         0.10334   -0.01147   -0.05098   -0.02301 
AFIX  33 
H2A   2    0.552152    0.635000    0.287425    11.00000   -1.50000 
H2B   2    0.494228    0.694655    0.276161    11.00000   -1.50000 
H2C   2    0.484076    0.659021    0.341213    11.00000   -1.50000 
AFIX   0 
C3    1    0.506465    0.535753    0.244132    11.00000    0.07956    0.09680 = 
         0.10543   -0.00889   -0.05014   -0.01899 
AFIX  33 
H3A   2    0.544552    0.500291    0.227826    11.00000   -1.50000 
H3B   2    0.473240    0.523419    0.277979    11.00000   -1.50000 
H3C   2    0.489140    0.560800    0.213680    11.00000   -1.50000 
AFIX   0 
C4    1    0.594764    0.545208    0.248247    11.00000    0.07559    0.09890 = 
         0.10776   -0.00636   -0.04471   -0.01556 
AFIX  33 
H4A   2    0.617259    0.507696    0.231056    11.00000   -1.50000 
H4B   2    0.611840    0.574700    0.219813    11.00000   -1.50000 
H4C   2    0.601712    0.538138    0.284487    11.00000   -1.50000 
AFIX   6 
  
RESI dma 21 
N     5    0.376217    0.661377    0.477476    11.00000    0.10176    0.07012 = 
         0.18961   -0.04150   -0.06377   -0.01232 
O     4    0.354452    0.755274    0.483283    11.00000    0.09456    0.06225 = 
         0.18441   -0.04270   -0.06791   -0.01529 
C1    1    0.346276    0.720092    0.466714    11.00000    0.09808    0.06618 = 
         0.18662   -0.04365   -0.06724   -0.01517 
C2    1    0.301109    0.744271    0.434808    11.00000    0.09941    0.07265 = 
         0.18784   -0.04497   -0.06922   -0.01440 
AFIX  33 
H2A   2    0.300264    0.710994    0.425009    11.00000   -1.50000 
H2B   2    0.257345    0.768097    0.460330    11.00000   -1.50000 
H2C   2    0.316379    0.769427    0.398358    11.00000   -1.50000 
AFIX   0 
C3    1    0.418202    0.639318    0.507182    11.00000    0.10162    0.07857 = 
         0.19269   -0.03626   -0.06462   -0.00934 
AFIX  33 
H3A   2    0.436579    0.595556    0.511913    11.00000   -1.50000 
H3B   2    0.453280    0.653654    0.484148    11.00000   -1.50000 
H3C   2    0.394037    0.653357    0.546209    11.00000   -1.50000 
AFIX   0 
C4    1    0.372107    0.620300    0.454525    11.00000    0.10698    0.07132 = 
         0.19318   -0.04425   -0.06053   -0.01436 
AFIX  33 
H4A   2    0.397354    0.579309    0.467323    11.00000   -1.50000 
H4B   2    0.326684    0.626018    0.469330    11.00000   -1.50000 
H4C   2    0.389469    0.627457    0.411214    11.00000   -1.50000 
AFIX   6 
  
RESI dma 22 
N     5    0.100347    1.100378    0.549541    11.00000    0.06730    0.04894 = 
         0.13392   -0.02152   -0.05665   -0.00237 
O     4    0.206529    1.059733    0.494239    11.00000    0.06437    0.04419 = 
         0.12952   -0.02446   -0.06191   -0.00200 
C1    1    0.149061    1.084945    0.498219    11.00000    0.06515    0.04640 = 
         0.13149   -0.02284   -0.06018   -0.00227 
C2    1    0.134451    1.098996    0.444022    11.00000    0.06691    0.05564 = 
         0.13229   -0.02310   -0.06112    0.00554 
AFIX  33 
H2A   2    0.087442    1.118584    0.454766    11.00000   -1.50000 
H2B   2    0.154972    1.125649    0.414180    11.00000   -1.50000 
H2C   2    0.151449    1.061885    0.427907    11.00000   -1.50000 
AFIX   0 
C3    1    0.112772    1.084465    0.602779    11.00000    0.07393    0.05727 = 
         0.13257   -0.01876   -0.05414    0.00018 
AFIX  33 
H3A   2    0.071717    1.099228    0.636302    11.00000   -1.50000 
H3B   2    0.133649    1.040918    0.610255    11.00000   -1.50000 
H3C   2    0.141368    1.102465    0.597858    11.00000   -1.50000 
AFIX   0 
C4    1    0.031345    1.131537    0.556623    11.00000    0.06664    0.05348 = 
         0.13968   -0.01666   -0.04988    0.00282 
AFIX  33 
H4A   2    0.003812    1.138507    0.597995    11.00000   -1.50000 
H4B   2    0.024878    1.169884    0.531249    11.00000   -1.50000 
H4C   2    0.019778    1.106796    0.545301    11.00000   -1.50000 
AFIX   6 
  
RESI dma 23 
N     5   -0.158225    0.689846    0.601926    11.00000    0.07092    0.10117 = 
         0.16515   -0.02962   -0.05996   -0.01750 
O     4   -0.107498    0.748337    0.584906    11.00000    0.06345    0.09355 = 
         0.15909   -0.02906   -0.06213   -0.01515 
C1    1   -0.127420    0.725325    0.565932    11.00000    0.06743    0.09736 = 
         0.16209   -0.02995   -0.06118   -0.01604 
C2    1   -0.117396    0.738499    0.501479    11.00000    0.06853    0.09889 = 
         0.16241   -0.03183   -0.06487   -0.01587 
AFIX  33 
H2A   2   -0.135740    0.717093    0.494032    11.00000   -1.50000 
H2B   2   -0.139044    0.781536    0.491509    11.00000   -1.50000 
H2C   2   -0.070894    0.725424    0.477029    11.00000   -1.50000 
AFIX   0 
C3    1   -0.162374    0.680142    0.661362    11.00000    0.07853    0.11016 = 
         0.16316   -0.02534   -0.05952   -0.01753 
AFIX  33 
H3A   2   -0.185431    0.653793    0.686006    11.00000   -1.50000 
H3B   2   -0.118602    0.661527    0.661372    11.00000   -1.50000 
H3C   2   -0.185920    0.718482    0.677268    11.00000   -1.50000 
AFIX   0 
C4    1   -0.171485    0.658415    0.572581    11.00000    0.07229    0.10043 = 
         0.16834   -0.03100   -0.06004   -0.01976 
AFIX  33 
H4A   2   -0.194220    0.633505    0.602688    11.00000   -1.50000 
H4B   2   -0.198503    0.688001    0.550757    11.00000   -1.50000 
H4C   2   -0.130400    0.633187    0.545110    11.00000   -1.50000 
AFIX   6 
  
RESI dma 24 
  
EADP NA_24 NB_24 
EADP OA_24 OB_24 
EADP C1A_24 C1B_24 
EADP C2A_24 C3B_24 
EADP C3A_24 C2B_24 
EADP C4A_24 C4B_24 
PART 1 
NA    5    0.278129    0.079766    0.576368    31.00000    0.05146    0.05730 = 
         0.14623   -0.02258   -0.03404   -0.02429 
OA    4    0.201630    0.167035    0.609791    31.00000    0.05085    0.05740 = 
         0.14605   -0.02266   -0.03426   -0.02392 
C1A   1    0.237874    0.114108    0.619663    31.00000    0.05117    0.05739 = 
         0.14614   -0.02253   -0.03416   -0.02415 
C2A   1    0.236852    0.088797    0.681298    31.00000    0.05228    0.05984 = 
         0.14688   -0.02081   -0.03323   -0.02396 
AFIX  33 
H2AA  2    0.267895    0.047106    0.681346    31.00000   -1.50000 
H2AB  2    0.248777    0.112082    0.694128    31.00000   -1.50000 
H2AC  2    0.193221    0.090761    0.708459    31.00000   -1.50000 
AFIX   0 
C3A   1    0.291376    0.097406    0.522624    31.00000    0.05237    0.05795 = 
         0.14575   -0.02260   -0.03443   -0.02324 
AFIX  33 
H3AA  2    0.322238    0.063357    0.499968    31.00000   -1.50000 
H3AB  2    0.251664    0.116215    0.514782    31.00000   -1.50000 
H3AC  2    0.310655    0.126535    0.510802    31.00000   -1.50000 
AFIX   0 
C4A   1    0.321612    0.014351    0.591007    31.00000    0.05139    0.05661 = 
         0.14643   -0.02293   -0.03397   -0.02468 
AFIX  33 
H4AA  2    0.307955    0.004170    0.634014    31.00000   -1.50000 
H4AB  2    0.317518   -0.012432    0.574743    31.00000   -1.50000 
H4AC  2    0.366882    0.009917    0.573527    31.00000   -1.50000 
AFIX   6 
PART 2 
  
NB    5    0.266373    0.072056    0.613950   -31.00000    0.05146    0.05730 = 
         0.14623   -0.02258   -0.03404   -0.02429 
OB    4    0.207526    0.168417    0.592423   -31.00000    0.05085    0.05740 = 
         0.14605   -0.02266   -0.03426   -0.02392 
C1B   1    0.250710    0.119333    0.575366   -31.00000    0.05117    0.05739 = 
         0.14614   -0.02253   -0.03416   -0.02415 
C2B   1    0.285088    0.113089    0.510179   -31.00000    0.05237    0.05795 = 
         0.14575   -0.02260   -0.03443   -0.02324 
AFIX  33 
H2BA  2    0.317249    0.072088    0.504465   -31.00000   -1.50000 
H2BB  2    0.253449    0.122218    0.493870   -31.00000   -1.50000 
H2BC  2    0.306901    0.140905    0.489849   -31.00000   -1.50000 
AFIX   0 
C3B   1    0.205014    0.087605    0.681372   -31.00000    0.05228    0.05984 = 
         0.14688   -0.02081   -0.03323   -0.02396 
AFIX  33 
H3BA  2    0.214718    0.053666    0.711263   -31.00000   -1.50000 
H3BB  2    0.200722    0.123252    0.691787   -31.00000   -1.50000 
H3BC  2    0.164343    0.094831    0.679808   -31.00000   -1.50000 
AFIX   0 
C4B   1    0.301826    0.014043    0.604011   -31.00000    0.05139    0.05661 = 
         0.14643   -0.02293   -0.03397   -0.02468 
AFIX  33 
H4BA  2    0.305420   -0.010897    0.640838   -31.00000   -1.50000 
H4BB  2    0.280444    0.001563    0.590049   -31.00000   -1.50000 
H4BC  2    0.345229    0.009551    0.573964   -31.00000   -1.50000 
AFIX   6 
PART 0 
RESI dma 25 
  
N     5    0.290713    0.659703    0.663449    11.00000    0.20273    0.11926 = 
         0.27403   -0.03239   -0.16621   -0.03014 
O     4    0.266244    0.616334    0.620090    11.00000    0.19945    0.12068 = 
         0.27221   -0.03354   -0.16825   -0.03076 
C1    1    0.263053    0.662649    0.629551    11.00000    0.20203    0.11886 = 
         0.27347   -0.03284   -0.16629   -0.03074 
C2    1    0.228239    0.722840    0.601564    11.00000    0.20185    0.11796 = 
         0.27320   -0.03120   -0.16547   -0.03066 
AFIX  33 
H2A   2    0.230244    0.754167    0.613433    11.00000   -1.50000 
H2B   2    0.249027    0.724102    0.558410    11.00000   -1.50000 
H2C   2    0.182827    0.729356    0.614668    11.00000   -1.50000 
AFIX   0 
C3    1    0.322583    0.602548    0.688703    11.00000    0.20591    0.12223 = 
         0.27574   -0.02718   -0.16241   -0.02459 
AFIX  33 
H3A   2    0.340872    0.606225    0.712561    11.00000   -1.50000 
H3B   2    0.291535    0.583754    0.713912    11.00000   -1.50000 
H3C   2    0.357512    0.577907    0.657204    11.00000   -1.50000 
AFIX   0 
C4    1    0.290660    0.710320    0.673463    11.00000    0.20386    0.12060 = 
         0.27557   -0.03384   -0.16604   -0.03179 
AFIX  33 
H4A   2    0.313604    0.698061    0.699626    11.00000   -1.50000 
H4B   2    0.312484    0.730140    0.635690    11.00000   -1.50000 
H4C   2    0.245857    0.738026    0.692052    11.00000   -1.50000 
AFIX   6 
RESI dma 26 
  
N     5    0.320968    0.484211    0.387973    11.00000    0.10692    0.17005 = 
         0.15649   -0.01542   -0.05772   -0.02625 
O     4    0.281353    0.523713    0.471014    11.00000    0.10598    0.17083 = 
         0.15284   -0.01584   -0.06143   -0.02595 
C1    1    0.300630    0.529610    0.415945    11.00000    0.10591    0.17009 = 
         0.15565   -0.01529   -0.05986   -0.02649 
C2    1    0.300031    0.589199    0.380512    11.00000    0.10392    0.16807 = 
         0.15583   -0.01625   -0.06418   -0.02831 
AFIX  33 
H2A   2    0.316549    0.586134    0.338368    11.00000   -1.50000 
H2B   2    0.255563    0.619422    0.392967    11.00000   -1.50000 
H2C   2    0.327591    0.600750    0.387184    11.00000   -1.50000 
AFIX   0 
C3    1    0.312670    0.429625    0.429880    11.00000    0.10958    0.16942 = 
         0.15885   -0.01306   -0.05346   -0.02647 
AFIX  33 
H3A   2    0.328337    0.397540    0.407129    11.00000   -1.50000 
H3B   2    0.337596    0.416461    0.454457    11.00000   -1.50000 
H3C   2    0.266689    0.439441    0.455256    11.00000   -1.50000 
AFIX   0 
C4    1    0.348328    0.493566    0.323587    11.00000    0.10819    0.17185 = 
         0.15595   -0.01497   -0.05717   -0.02530 
AFIX  33 
H4A   2    0.361517    0.457210    0.308075    11.00000   -1.50000 
H4B   2    0.315703    0.526800    0.309420    11.00000   -1.50000 
H4C   2    0.386178    0.502985    0.309933    11.00000   -1.50000 
AFIX   6 
  
RESI dma 27 
N     5    0.460826    0.247546    0.665016    11.00000    0.09885    0.12928 = 
         0.16862   -0.04906   -0.04273   -0.02515 
O     4    0.367839    0.328757    0.677708    11.00000    0.09587    0.13003 = 
         0.16685   -0.05061   -0.04714   -0.02726 
C1    1    0.402356    0.281516    0.699267    11.00000    0.09883    0.12992 = 
         0.16812   -0.04888   -0.04282   -0.02511 
C2    1    0.378031    0.262966    0.765150    11.00000    0.10302    0.13366 = 
         0.16833   -0.04669   -0.03899   -0.02135 
AFIX  33 
H2A   2    0.410759    0.225206    0.774593    11.00000   -1.50000 
H2B   2    0.369757    0.293891    0.785572    11.00000   -1.50000 
H2C   2    0.337774    0.257751    0.778087    11.00000   -1.50000 
AFIX   0 
C3    1    0.482600    0.271880    0.602603    11.00000    0.10049    0.12870 = 
         0.16820   -0.05002   -0.04134   -0.02614 
AFIX  33 
H3A   2    0.525952    0.243957    0.580881    11.00000   -1.50000 
H3B   2    0.452341    0.277693    0.586087    11.00000   -1.50000 
H3C   2    0.484093    0.310291    0.599030    11.00000   -1.50000 
AFIX   0 
C4    1    0.503477    0.190825    0.687604    11.00000    0.10193    0.13016 = 
         0.17173   -0.04615   -0.04085   -0.02124 
AFIX  33 
H4A   2    0.544032    0.173440    0.654648    11.00000   -1.50000 
H4B   2    0.512991    0.198445    0.716332    11.00000   -1.50000 
H4C   2    0.481715    0.162945    0.706823    11.00000   -1.50000 
  
AFIX   0 
HKLF 4 
  
  
  
  
REM  eric029 in P-1 
REM R1 =  0.1157 for   16444 Fo > 4sig(Fo)  and  0.1819 for all   33629 data 
REM   2258 parameters refined using   4402 restraints 
  
END 
  
WGHT      0.2000      0.0000 
  
REM Highest difference peak  1.253,  deepest hole -1.235,  1-sigma level  0.116 
Q1    1  -0.0134  0.4372  0.9902  11.00000  0.05    1.25 
Q2    1   0.8717  0.3474 -0.0309  11.00000  0.05    1.22 
Q3    1  -0.2170  0.5672  0.9408  11.00000  0.05    1.18 
Q4    1  -0.1016  0.4923  0.5835  11.00000  0.05    1.10 
Q5    1   0.6631  0.2101  0.0768  11.00000  0.05    1.09 
Q6    1   0.2633  0.2393  0.5510  11.00000  0.05    1.06 
Q7    1   0.0590  0.2220  0.9490  11.00000  0.05    1.03 
Q8    1  -0.1388  0.7014  0.5527  11.00000  0.05    1.00 
Q9    1   0.6220  0.3010  0.1278  11.00000  0.05    0.97 
Q10   1   0.3183  0.3082  0.5307  11.00000  0.05    0.85 
; 
_shelx_res_checksum   58830 
  
_shelx_hkl_file 
; 
  -1   0   0   35.24    6.58 
  -1   0   0   37.37    6.58 
   1   0   0   40.27    6.62 
  -2   0   0   83.05   13.33 
  -2   0   0   70.83   13.31 
   2   0   0   73.32   13.38 
  -3   0   0  121.07   21.79 
  -3   0   0  127.76   21.81 
  -3   0   0  124.48   21.79 
   3   0   0  129.98   22.01 
   3   0   0  116.06   21.87 
  -4   0   0   15.89    3.74 
  -4   0   0   21.86    3.82 
   4   0   0   18.15    4.34 
   4   0   0   21.94    4.10 
  -5   0   0   94.42   13.77 
  -5   0   0   66.01   13.59 
  -5   0   0   87.73   13.74 
   5   0   0   63.78   13.98 
   5   0   0   61.42   13.77 
  -6   0   0   60.93   11.03 
  -6   0   0   59.54   11.02 
  -6   0   0   54.48   11.11 
  -6   0   0   64.61   11.19 
   6   0   0   62.63   11.34 
   6   0   0   68.82   11.83 
  -7   0   0   13.78    3.32 
  -7   0   0   22.17    3.83 
  -7   0   0   14.19    3.31 
  -7   0   0   17.82    3.71 
  -7   0   0   14.03    2.73 
   7   0   0   10.05    3.59 
   7   0   0   15.78    4.31 
  -8   0   0   59.87   11.12 
  -8   0   0   58.74   10.76 
  -8   0   0   66.56   11.45 
   8   0   0   61.02   11.52 
   8   0   0   64.28   12.71 
  -9   0   0    7.03    2.72 
  -9   0   0    8.01    1.94 
  -9   0   0   17.31    3.03 
   9   0   0   14.05    3.87 
   9   0   0   11.87    4.14 
 -10   0   0    3.01    0.98 
 -10   0   0    1.07    1.49 
  10   0   0   -1.52    2.78 
 -11   0   0    6.60    3.04 
 -11   0   0    8.69    2.03 
 -11   0   0   14.70    3.39 
  11   0   0    6.67    4.01 
 -12   0   0    4.84    1.53 
 -12   0   0    2.83    2.35 
  12   0   0    4.37    3.79 
 -13   0   0   31.65    5.52 
 -13   0   0   23.61    6.96 
  13   0   0   24.79    8.63 
 -14   0   0   -0.48    1.02 
 -14   0   0   -0.13    1.15 
  14   0   0   -1.27    2.33 
 -15   0   0    2.41    1.59 
 -15   0   0    2.53    1.39 
  15   0   0    4.05    2.69 
 -16   0   0    9.72    2.56 
 -16   0   0   11.02    2.47 
  16   0   0    3.37    2.89 
 -17   0   0   10.95    2.59 
 -17   0   0    8.82    2.31 
  17   0   0    1.93    3.11 
 -18   0   0    6.34    2.11 
 -18   0   0    7.37    2.16 
  18   0   0    5.12    3.23 
 -19   0   0    1.57    0.94 
 -19   0   0    4.59    0.89 
 -19   0   0    3.58    1.67 
 -20   0   0    2.85    0.89 
 -20   0   0    3.59    0.96 
 -20   0   0    4.47    1.65 
 -21   0   0    1.35    0.88 
 -22   0   0    1.59    0.64 
 -22   1   0    1.32    0.77 
 -21   1   0    0.71    0.85 
 -21   1   0    0.90    0.52 
 -20   1   0   -0.40    0.85 
 -19   1   0    0.01    0.59 
 -19   1   0   -1.92    1.23 
 -19   1   0    0.25    0.69 
  18  -1   0    2.16    3.91 
 -18   1   0    0.83    0.58 
 -18   1   0   -0.46    0.93 
 -18   1   0    0.32    1.33 
  17  -1   0    6.50    3.37 
 -17   1   0    2.85    0.79 
 -17   1   0    1.17    1.50 
 -17   1   0    3.75    1.66 
  16  -1   0   -0.94    3.09 
 -16   1   0    0.74    1.31 
 -16   1   0    1.00    1.50 
 -16   1   0    0.29    0.66 
  15  -1   0   15.59    4.68 
 -15   1   0   23.29    4.22 
 -15   1   0   15.82    3.63 
  14  -1   0    0.50    1.99 
 -14   1   0   -0.46    1.13 
 -14   1   0    0.35    1.38 
  13  -1   0    5.56    3.04 
  13  -1   0    6.09    4.91 
 -13   1   0    2.13    1.52 
 -13   1   0    6.39    1.62 
 -13   1   0    3.72    3.20 
  12  -1   0    7.70    4.90 
 -12   1   0   -0.25    1.99 
  11  -1   0    1.81    3.14 
 -11   1   0    1.42    1.26 
 -11   1   0    2.49    2.26 
  10  -1   0   -4.22    2.86 
 -10   1   0    0.88    1.45 
 -10   1   0    0.79    1.71 
 -10   1   0    0.52    0.74 
   9  -1   0   -0.40    2.31 
   9  -1   0   -1.33    2.01 
  -9   1   0    0.43    0.74 
  -9   1   0   -0.38    1.48 
  -9   1   0   -1.09    1.59 
   8  -1   0    8.27    3.21 
   8  -1   0    2.30    2.77 
   8  -1   0    4.88    2.09 
  -8   1   0    4.04    2.03 
  -8   1   0    9.79    1.70 
  -8   1   0    9.87    2.75 
   7  -1   0    4.13    3.07 
   7  -1   0    6.86    2.50 
  -7   1   0    9.99    1.92 
  -7   1   0   -0.24    1.08 
  -7   1   0    4.24    0.97 
   6  -1   0    6.74    3.13 
   6  -1   0    9.52    2.79 
  -6   1   0    2.00    1.77 
  -6   1   0    9.29    2.09 
  -6   1   0    4.65    1.19 
   5  -1   0   67.27   11.59 
   5  -1   0   60.55   11.23 
  -5   1   0   52.31   11.07 
  -5   1   0   62.59   10.70 
   4  -1   0    4.45    2.01 
   4  -1   0    3.13    2.33 
  -4   1   0    5.00    1.29 
  -4   1   0    6.20    1.71 
  -4   1   0    6.38    1.89 
   3  -1   0   34.02    6.58 
  -3   1   0   31.56    6.35 
  -3   1   0   37.44    6.09 
  -3   1   0   30.25    6.39 
   2  -1   0    0.55    0.88 
   2  -1   0    0.53    0.52 
  -2   1   0   -0.40    0.64 
  -2   1   0   -0.16    0.68 
   1  -1   0  109.37   19.57 
   1  -1   0  113.02   19.52 
   1  -1   0  117.17   19.58 
  -1   1   0  109.93   19.37 
  -1   1   0  106.49   19.55 
   0  -1   0  215.81   37.65 
   0  -1   0  211.32   37.68 
   0  -1   0  216.52   37.66 
   0  -1   0  201.96   37.70 
   0   1   0  231.08   37.71 
  -1  -1   0    7.20    1.54 
  -1  -1   0   11.65    1.73 
  -2  -1   0  384.36   67.01 
  -2  -1   0  421.86   66.99 
  -2  -1   0  343.79   66.98 
  -3  -1   0  490.24   84.24 
  -3  -1   0  470.98   84.20 
  -3  -1   0  482.99   84.28 
  -4  -1   0  115.40   21.21 
  -4  -1   0  131.85   21.52 
  -4  -1   0  121.33   21.22 
  -5  -1   0   52.63    9.68 
  -5  -1   0   68.70   10.04 
  -5  -1   0   49.90    9.68 
  -6  -1   0    2.02    1.04 
  -6  -1   0    0.49    0.91 
  -6  -1   0    4.63    1.66 
   6   1   0    2.12    2.19 
   6   1   0    3.42    1.99 
  -7  -1   0    1.05    1.31 
  -7  -1   0    1.36    1.06 
  -7  -1   0    0.56    1.45 
  -7  -1   0    1.43    1.06 
   7   1   0   -1.05    1.93 
   7   1   0    2.92    1.76 
  -8  -1   0   14.88    4.18 
  -8  -1   0   30.59    4.60 
   8   1   0   22.03    5.37 
   8   1   0   19.31    4.72 
  -9  -1   0    1.03    0.51 
  -9  -1   0    2.85    1.42 
  -9  -1   0   -0.62    1.14 
   9   1   0   -1.89    1.92 
   9   1   0   -0.54    2.22 
 -10  -1   0   24.57    5.01 
 -10  -1   0   22.58    4.20 
 -10  -1   0   23.11    5.20 
  10   1   0   22.07    6.38 
 -11  -1   0    0.78    1.62 
 -11  -1   0    1.30    0.72 
 -11  -1   0    0.76    1.65 
  11   1   0    3.53    3.38 
 -12  -1   0   10.05    1.98 
 -12  -1   0   11.50    3.50 
 -12  -1   0   10.99    3.03 
 -12  -1   0    6.34    1.89 
  12   1   0    5.60    4.21 
 -13  -1   0    9.12    2.25 
 -13  -1   0   13.00    3.80 
  13   1   0    4.19    3.88 
 -14  -1   0   29.82    5.57 
 -14  -1   0   26.94    7.35 
 -14  -1   0   29.61    5.57 
  14   1   0   28.79    9.18 
 -15  -1   0    0.82    1.05 
 -15  -1   0   -0.42    1.07 
  15   1   0    0.50    2.22 
 -16  -1   0    4.56    1.62 
 -16  -1   0    7.20    1.92 
  16   1   0   -0.10    2.39 
 -17  -1   0    7.41    2.19 
 -17  -1   0    6.53    1.98 
  17   1   0    6.41    3.20 
 -18  -1   0    5.40    1.92 
 -18  -1   0    8.03    2.29 
  18   1   0    1.63    3.08 
 -19  -1   0   -0.09    0.75 
 -19  -1   0    1.14    1.36 
 -20  -1   0   -1.98    1.59 
 -20  -1   0    0.02    0.73 
 -21  -1   0    2.82    0.74 
 -21  -1   0    2.91    1.02 
 -22  -1   0    1.15    0.53 
 -22  -1   0    0.55    0.80 
  21  -2   0    2.48    1.52 
 -21   2   0    1.73    0.66 
 -21   2   0    1.01    0.58 
 -20   2   0   -0.55    0.86 
 -19   2   0    5.75    1.02 
 -19   2   0    3.16    1.69 
 -19   2   0    1.50    1.13 
 -18   2   0   -0.14    0.57 
 -18   2   0    0.16    1.38 
 -18   2   0   -0.42    0.74 
  17  -2   0   -2.99    2.40 
 -17   2   0    2.54    1.51 
 -17   2   0    1.01    1.34 
 -17   2   0    1.77    0.68 
  16  -2   0   -0.45    2.46 
 -16   2   0    0.84    1.56 
 -16   2   0    0.51    0.47 
 -16   2   0   -1.12    1.36 
  15  -2   0    1.89    2.63 
 -15   2   0    1.92    1.40 
 -15   2   0    2.41    0.72 
 -15   2   0    2.09    1.60 
  14  -2   0   11.98    3.86 
 -14   2   0   12.52    2.27 
 -14   2   0   12.86    3.13 
 -14   2   0   10.99    2.70 
  13  -2   0   -0.94    2.07 
 -13   2   0    3.21    1.58 
 -13   2   0    2.39    0.82 
 -13   2   0    5.38    1.64 
  12  -2   0   53.00   14.29 
  12  -2   0   61.77   12.56 
 -12   2   0   67.67   11.48 
 -12   2   0   84.46   14.36 
 -12   2   0   58.08   11.61 
  11  -2   0    3.19    3.95 
 -11   2   0   12.02    2.66 
 -11   2   0   12.33    2.57 
 -11   2   0   11.12    4.26 
  10  -2   0   27.43    7.93 
 -10   2   0   29.37    7.06 
   9  -2   0   12.12    5.19 
  -9   2   0   17.37    4.65 
   8  -2   0   35.00    6.60 
   8  -2   0   30.62    7.77 
   8  -2   0   31.57    7.29 
  -8   2   0   30.13    7.12 
  -8   2   0   29.17    6.55 
  -8   2   0   33.56    5.98 
   7  -2   0   58.65   10.18 
   7  -2   0   40.76    8.36 
   7  -2   0   54.94    9.49 
  -7   2   0   42.99    9.28 
  -7   2   0   51.19    8.53 
  -7   2   0   42.63    8.15 
   6  -2   0   37.79    6.62 
  -6   2   0   26.38    6.31 
  -6   2   0   28.97    5.40 
   5  -2   0    0.27    1.24 
   5  -2   0    5.68    2.08 
  -5   2   0    3.39    1.59 
  -5   2   0    0.23    0.50 
  -5   2   0    1.97    1.44 
  -5   2   0    1.89    0.80 
   4  -2   0    2.56    2.38 
   4  -2   0    6.97    2.33 
  -4   2   0    7.18    2.31 
  -4   2   0    5.95    2.22 
   3  -2   0    0.64    1.68 
   3  -2   0    0.59    1.48 
  -3   2   0    4.09    1.49 
   2  -2   0   72.31   12.14 
   2  -2   0   64.82   12.19 
   2  -2   0   70.59   12.19 
  -2   2   0   64.02   11.74 
  -2   2   0   68.76   12.16 
   1  -2   0   12.86    2.25 
   1  -2   0    7.21    2.06 
   1  -2   0   11.04    2.15 
  -1   2   0    5.05    1.93 
   0  -2   0  158.70   27.40 
   0  -2   0  146.85   27.49 
   0  -2   0  166.97   27.48 
   0   2   0  152.48   27.49 
  -1  -2   0  311.41   55.06 
  -1  -2   0  312.03   55.08 
  -1  -2   0  341.26   54.97 
  -1  -2   0  296.46   55.01 
  -1  -2   0  309.89   55.02 
  -2  -2   0    0.88    0.69 
  -2  -2   0    0.26    1.01 
  -2  -2   0    2.85    0.57 
  -2  -2   0    2.84    0.56 
  -2  -2   0    1.18    0.98 
  -3  -2   0  765.46  130.30 
  -3  -2   0  721.86  130.19 
  -3  -2   0  748.77  130.22 
  -4  -2   0  537.32   93.34 
  -4  -2   0  512.35   93.28 
  -4  -2   0  548.42   93.26 
  -5  -2   0   19.64    4.63 
  -5  -2   0   23.73    4.67 
  -5  -2   0   20.77    4.68 
  -6  -2   0   -0.13    1.26 
  -7  -2   0  147.24   26.84 
  -7  -2   0  137.40   27.16 
  -7  -2   0  155.99   26.78 
  -7  -2   0  159.91   26.81 
   7   2   0  157.09   27.44 
   7   2   0  147.26   27.20 
  -8  -2   0    0.84    1.05 
  -8  -2   0    0.63    1.06 
  -8  -2   0    0.84    0.93 
  -8  -2   0   -2.48    1.47 
   8   2   0    0.29    1.75 
   8   2   0    1.48    2.38 
  -9  -2   0   59.91   11.73 
  -9  -2   0   56.96   11.96 
  -9  -2   0   75.72   11.89 
   9   2   0   61.83   13.17 
   9   2   0   64.15   12.30 
 -10  -2   0   -0.73    1.06 
 -10  -2   0   -0.06    1.25 
  10   2   0   -1.59    2.44 
 -11  -2   0   30.78    5.66 
 -11  -2   0   36.39    6.59 
 -11  -2   0   32.22    6.76 
  11   2   0   30.71    8.14 
 -12  -2   0    1.55    1.78 
 -12  -2   0    8.46    2.27 
 -12  -2   0    3.59    1.05 
  12   2   0    4.57    3.75 
 -13  -2   0   15.78    4.39 
 -13  -2   0   17.87    3.73 
 -13  -2   0   16.09    4.88 
 -13  -2   0   22.43    3.75 
  13   2   0   22.03    6.94 
 -14  -2   0    4.11    1.34 
 -14  -2   0    2.27    2.48 
  14   2   0    3.69    4.86 
 -15  -2   0    2.41    1.24 
 -15  -2   0    2.13    1.21 
 -16  -2   0    2.91    1.32 
 -16  -2   0    1.24    1.30 
  16   2   0    1.62    2.86 
 -17  -2   0    1.04    1.33 
 -17  -2   0   -0.70    1.23 
  17   2   0    2.03    3.15 
 -18  -2   0   -0.52    1.23 
 -18  -2   0   -1.67    1.23 
  18   2   0   -1.98    2.28 
 -19  -2   0   -1.74    1.23 
 -19  -2   0    1.91    0.88 
 -20  -2   0    3.03    1.57 
 -20  -2   0    0.78    0.76 
 -21  -2   0    0.62    1.38 
 -21  -2   0   -1.10    0.78 
 -22  -2   0   -0.26    0.78 
 -21   3   0   -1.17    0.71 
  20  -3   0    1.09    1.63 
 -20   3   0    4.37    1.14 
 -20   3   0    4.20    0.94 
 -19   3   0    3.80    1.03 
 -18   3   0    2.50    0.99 
 -18   3   0    0.33    0.53 
 -18   3   0   -1.27    1.36 
 -17   3   0    0.83    1.43 
 -17   3   0    0.54    0.80 
 -17   3   0    4.60    2.00 
 -17   3   0    1.38    0.57 
  16  -3   0   -1.44    2.45 
 -16   3   0    2.34    1.47 
 -16   3   0    0.36    1.38 
 -16   3   0   -1.59    0.54 
  15  -3   0   12.80    4.45 
 -15   3   0   12.27    3.55 
 -15   3   0   18.29    2.91 
 -15   3   0   12.93    3.36 
  14  -3   0    1.37    2.25 
 -14   3   0    0.69    0.45 
 -14   3   0    1.68    1.27 
 -14   3   0   -0.38    1.05 
  13  -3   0    2.18    2.48 
 -13   3   0    5.43    1.11 
 -13   3   0    3.77    1.92 
 -13   3   0    8.43    1.80 
  12  -3   0    3.72    4.36 
  12  -3   0    5.27    3.06 
 -12   3   0    6.43    1.85 
 -12   3   0    7.14    1.37 
 -12   3   0    7.61    2.09 
 -12   3   0    7.85    3.90 
  11  -3   0    4.95    4.18 
  11  -3   0    5.69    2.55 
 -11   3   0    5.93    3.79 
 -11   3   0    6.64    1.32 
 -11   3   0    9.12    2.18 
 -11   3   0    6.41    1.91 
  10  -3   0    2.42    3.93 
  10  -3   0    0.38    1.69 
 -10   3   0    2.12    2.57 
 -10   3   0    3.92    1.34 
 -10   3   0    1.24    0.99 
   9  -3   0    0.27    3.20 
  -9   3   0   -0.32    2.20 
   8  -3   0   14.02    5.20 
   8  -3   0   13.27    4.58 
  -8   3   0   20.81    4.81 
   7  -3   0   21.55    5.49 
   7  -3   0   23.59    6.13 
   7  -3   0   27.08    4.88 
  -7   3   0   21.72    5.59 
  -7   3   0   20.79    4.36 
   6  -3   0   -2.53    1.21 
   6  -3   0    2.95    2.36 
   6  -3   0   -1.44    1.32 
  -6   3   0    4.69    2.14 
  -6   3   0    0.63    1.01 
  -6   3   0   -0.07    0.47 
   5  -3   0    3.14    2.46 
   5  -3   0    2.70    2.08 
  -5   3   0    0.55    0.71 
  -5   3   0    1.65    1.32 
  -5   3   0   -0.62    1.53 
   4  -3   0    1.98    2.05 
   4  -3   0    1.09    2.23 
  -4   3   0    1.05    1.22 
  -4   3   0    1.81    1.85 
  -4   3   0    0.73    0.88 
   3  -3   0   41.91    7.39 
   3  -3   0   27.36    7.09 
   3  -3   0   34.92    7.13 
  -3   3   0   37.00    7.23 
   2  -3   0   20.29    3.21 
   2  -3   0    8.43    2.79 
  -2   3   0    6.01    2.42 
   1  -3   0   81.77   16.68 
   1  -3   0   92.59   16.50 
   1  -3   0   99.23   16.73 
   1  -3   0   98.33   16.87 
  -1   3   0   95.41   16.81 
   0  -3   0  203.14   37.06 
   0  -3   0  221.88   37.02 
   0  -3   0  210.22   36.93 
   0  -3   0  205.61   36.90 
   0   3   0  210.24   37.05 
  -1  -3   0    1.31    1.20 
  -1  -3   0    0.05    0.68 
  -1  -3   0    3.88    1.01 
  -1  -3   0    2.78    1.16 
   1   3   0    0.75    0.93 
  -2  -3   0   79.37   14.20 
  -2  -3   0   68.15   14.33 
  -2  -3   0   91.10   14.37 
  -2  -3   0   81.87   14.17 
  -3  -3   0  142.66   22.81 
  -3  -3   0  128.45   22.40 
  -3  -3   0  131.07   22.53 
  -3  -3   0  118.21   22.38 
  -3  -3   0  127.27   22.67 
  -4  -3   0    3.40    1.69 
  -4  -3   0    1.23    1.52 
  -4  -3   0    4.70    1.58 
  -5  -3   0   80.54   14.60 
  -6  -3   0   11.01    3.38 
  -6  -3   0   12.91    3.31 
  -6  -3   0   11.73    3.20 
  -7  -3   0   25.54    5.72 
  -7  -3   0   23.87    5.69 
  -8  -3   0  125.51   20.32 
  -8  -3   0  109.94   19.63 
  -8  -3   0  105.49   19.48 
  -8  -3   0  102.72   19.45 
   8   3   0  125.16   20.24 
   8   3   0  123.82   20.37 
  -9  -3   0   29.66    6.21 
  -9  -3   0   33.21    6.00 
  -9  -3   0   34.82    6.31 
  -9  -3   0   31.34    6.01 
  -9  -3   0   31.67    7.02 
  -9  -3   0   29.44    6.35 
   9   3   0   25.53    6.90 
   9   3   0   42.78    7.92 
 -10  -3   0    0.02    1.17 
 -10  -3   0    1.66    1.08 
  10   3   0   -0.22    2.56 
  10   3   0    1.07    2.57 
 -11  -3   0  130.42   19.57 
 -11  -3   0   89.83   19.32 
  11   3   0   98.66   20.31 
 -12  -3   0    2.70    2.19 
  12   3   0    6.52    3.55 
 -13  -3   0    0.35    1.10 
 -13  -3   0    0.68    1.55 
 -13  -3   0    0.77    0.63 
 -13  -3   0    0.82    1.87 
  13   3   0   -1.33    2.95 
 -14  -3   0    1.82    1.24 
 -14  -3   0    3.13    2.05 
 -14  -3   0    1.37    0.86 
 -14  -3   0    1.15    2.16 
  14   3   0    3.32    3.85 
 -15  -3   0    7.25    1.93 
  15   3   0    1.16    5.36 
 -16  -3   0    5.66    1.71 
 -16  -3   0    5.50    1.72 
  16   3   0    7.93    3.34 
 -17  -3   0    5.75    1.69 
 -17  -3   0    3.31    1.45 
  17   3   0    7.03    3.52 
 -18  -3   0    1.11    1.33 
 -18  -3   0    1.31    1.27 
  18   3   0   -0.66    3.18 
 -19  -3   0    0.34    1.35 
 -19  -3   0    0.27    1.34 
  20  -4   0    5.29    1.69 
 -20   4   0    5.64    1.15 
 -20   4   0    4.98    1.18 
 -19   4   0    0.02    0.54 
 -19   4   0   -0.17    0.85 
 -18   4   0   -0.31    0.90 
 -17   4   0    2.77    0.97 
 -17   4   0    5.98    1.81 
  16  -4   0    0.57    2.61 
 -16   4   0    0.94    1.39 
 -16   4   0   -0.07    1.52 
 -16   4   0   -0.44    0.50 
  15  -4   0    1.32    2.85 
 -15   4   0    4.55    0.94 
 -15   4   0    4.98    1.74 
 -15   4   0    0.83    1.67 
  14  -4   0   -0.16    2.28 
 -14   4   0    0.29    0.50 
 -14   4   0   -0.21    1.54 
 -14   4   0    0.27    1.47 
  13  -4   0    3.77    2.44 
 -13   4   0    4.32    1.53 
 -13   4   0    2.90    1.69 
 -13   4   0    5.19    1.04 
  12  -4   0   10.60    4.07 
 -12   4   0   15.82    2.90 
 -12   4   0   15.47    3.38 
 -12   4   0   20.49    3.94 
  11  -4   0   35.72   10.25 
  11  -4   0   34.16    8.45 
 -11   4   0   41.06    7.33 
 -11   4   0   44.52    7.89 
 -11   4   0   41.00    9.99 
 -11   4   0   43.82    7.64 
  10  -4   0    0.44    1.86 
  10  -4   0   10.36    4.75 
 -10   4   0    4.82    1.26 
 -10   4   0    2.65    0.73 
 -10   4   0   -0.33    2.55 
 -10   4   0    3.41    1.62 
   9  -4   0   51.73   12.12 
   9  -4   0   54.58    9.82 
  -9   4   0   48.83   11.33 
  -9   4   0   49.80    9.41 
   8  -4   0   23.16    6.69 
   8  -4   0   30.04    5.40 
   8  -4   0   18.99    5.91 
  -8   4   0   24.33    4.76 
  -8   4   0   19.22    5.84 
   7  -4   0   14.63    4.88 
   7  -4   0   22.32    5.60 
   7  -4   0   21.15    4.10 
  -7   4   0   15.79    3.50 
  -7   4   0   14.95    4.54 
   6  -4   0   22.26    4.28 
   6  -4   0   16.53    4.90 
   6  -4   0   13.21    5.22 
  -6   4   0   18.45    5.04 
   5  -4   0   -1.57    1.46 
   5  -4   0    1.99    2.47 
   5  -4   0    0.68    2.07 
  -5   4   0   -0.16    1.67 
   4  -4   0   38.52    8.57 
   4  -4   0   47.95    9.01 
   4  -4   0   36.29    8.78 
  -4   4   0   45.02    8.90 
   3  -4   0   10.38    3.04 
   3  -4   0    4.47    2.75 
   3  -4   0    7.53    2.76 
  -3   4   0    6.35    1.48 
  -3   4   0    7.32    2.60 
   2  -4   0    4.65    2.59 
   2  -4   0    7.87    2.68 
   2  -4   0    4.97    2.54 
  -2   4   0    6.96    1.62 
  -2   4   0    3.52    2.14 
   1  -4   0   20.81    4.76 
  -1   4   0   20.55    4.68 
   0  -4   0  137.85   24.35 
   0  -4   0  147.02   24.63 
   0  -4   0  132.80   24.51 
   0  -4   0  130.24   24.38 
   0   4   0  138.74   24.55 
  -1  -4   0   55.73   10.15 
  -1  -4   0   58.88    9.97 
  -1  -4   0   51.34   10.03 
   1   4   0   52.64   10.08 
  -2  -4   0    0.12    1.11 
  -2  -4   0    0.82    1.48 
  -2  -4   0    1.99    1.16 
  -2  -4   0    1.43    1.08 
  -2  -4   0    2.05    1.19 
  -3  -4   0   39.13    7.41 
  -4  -4   0   67.02   12.39 
  -4  -4   0   74.48   12.57 
  -4  -4   0   65.94   12.39 
  -4  -4   0   83.25   13.06 
  -5  -4   0  171.04   30.28 
  -5  -4   0  171.08   30.01 
  -5  -4   0  165.08   30.12 
  -6  -4   0   31.47    7.23 
  -6  -4   0   37.83    7.62 
  -6  -4   0   37.54    7.18 
  -7  -4   0  246.44   43.90 
  -7  -4   0  250.29   44.13 
  -7  -4   0  246.08   43.90 
  -8  -4   0    7.38    2.96 
  -8  -4   0    9.57    3.35 
  -8  -4   0    8.48    2.37 
  -8  -4   0    8.71    2.15 
  -9  -4   0   36.72    6.83 
  -9  -4   0   43.81    8.42 
  -9  -4   0   37.28    6.79 
  -9  -4   0   36.17    7.10 
  -9  -4   0   39.59    7.28 
  -9  -4   0   37.03    7.12 
   9   4   0   44.34    8.50 
 -10  -4   0  123.88   22.92 
 -10  -4   0  141.57   22.56 
 -10  -4   0  113.97   22.17 
 -10  -4   0  125.51   22.06 
 -10  -4   0  124.85   22.04 
  10   4   0  128.94   23.04 
  10   4   0  114.80   22.80 
 -11  -4   0   19.46    4.36 
 -11  -4   0   18.67    4.06 
  11   4   0   18.80    5.78 
 -12  -4   0   11.69    3.69 
 -12  -4   0   25.07    4.19 
  12   4   0    9.32    5.15 
 -13  -4   0    4.70    1.98 
 -13  -4   0    2.08    1.79 
  13   4   0    5.47    4.00 
 -14  -4   0    2.69    1.29 
 -14  -4   0    1.13    1.88 
 -14  -4   0    0.80    1.43 
  14   4   0    5.22    4.75 
 -15  -4   0    0.43    1.24 
 -15  -4   0   -0.47    2.14 
  15   4   0   -1.20    4.85 
 -16  -4   0   -0.27    1.32 
 -16  -4   0    2.28    1.06 
 -17  -4   0    1.85    1.45 
 -17  -4   0    5.51    1.52 
  17   4   0    1.39    3.95 
 -18  -4   0    5.41    1.79 
 -19  -4   0    3.88    1.52 
 -20   5   0    0.46    0.77 
  19  -5   0    0.59    1.56 
 -19   5   0   -0.17    0.53 
 -19   5   0    2.13    0.86 
 -18   5   0    1.88    0.97 
 -17   5   0    1.82    1.00 
  16  -5   0   -1.38    4.38 
 -16   5   0    0.52    0.64 
 -16   5   0    0.63    0.95 
 -16   5   0    2.95    1.56 
 -16   5   0    0.58    2.09 
  15  -5   0    3.23    3.13 
 -15   5   0    1.93    1.65 
 -15   5   0    1.81    0.77 
 -15   5   0    0.81    1.38 
  14  -5   0   10.39    4.03 
 -14   5   0   18.47    3.44 
 -14   5   0   14.81    2.82 
 -14   5   0   14.17    3.72 
  13  -5   0   -0.32    2.88 
 -13   5   0    1.80    2.01 
 -13   5   0    6.14    1.66 
 -13   5   0    4.17    0.95 
  12  -5   0   10.64    3.49 
 -12   5   0    9.42    1.84 
 -12   5   0    7.58    2.52 
 -12   5   0   12.21    2.52 
  11  -5   0    3.38    3.98 
  11  -5   0    3.39    2.48 
 -11   5   0    0.43    3.10 
 -11   5   0    6.98    1.83 
 -11   5   0    1.86    1.76 
 -11   5   0    5.30    1.03 
  10  -5   0    1.99    4.01 
  10  -5   0    0.05    1.81 
 -10   5   0    0.13    0.97 
 -10   5   0    2.54    2.82 
 -10   5   0    1.89    1.36 
 -10   5   0    1.26    1.46 
 -10   5   0    0.37    0.44 
   9  -5   0    2.92    2.07 
   9  -5   0   -0.91    3.08 
  -9   5   0    0.44    0.49 
  -9   5   0    0.48    2.33 
  -9   5   0    0.41    1.20 
  -9   5   0    1.17    1.05 
   8  -5   0   20.80    7.13 
   8  -5   0   22.49    5.89 
  -8   5   0   32.07    5.72 
  -8   5   0   35.81    7.94 
   7  -5   0  147.28   27.46 
   7  -5   0  151.01   27.55 
   7  -5   0  144.19   28.13 
   7  -5   0  147.98   28.66 
  -7   5   0  161.21   27.32 
  -7   5   0  172.42   28.59 
   6  -5   0   58.67   10.33 
   6  -5   0   68.16   11.94 
   6  -5   0   68.08   12.35 
   6  -5   0   60.37   10.47 
  -6   5   0   48.17   10.07 
  -6   5   0   53.10   11.74 
   5  -5   0   14.95    4.18 
   5  -5   0   14.02    3.30 
   5  -5   0    9.09    3.98 
   5  -5   0   12.26    3.22 
  -5   5   0   12.85    2.82 
  -5   5   0   12.80    4.17 
   4  -5   0    0.12    2.15 
   4  -5   0   -1.95    1.17 
   4  -5   0    0.09    2.10 
   4  -5   0    0.46    1.43 
  -4   5   0   -0.24    1.47 
  -4   5   0    0.87    0.96 
   3  -5   0   43.89    9.29 
   3  -5   0   52.00    9.54 
   3  -5   0   35.81    8.89 
   3  -5   0   41.22    8.13 
  -3   5   0   49.15    8.06 
  -3   5   0   42.54    7.94 
  -3   5   0   45.36    9.24 
   2  -5   0   63.82   12.70 
   2  -5   0   69.88   12.76 
   2  -5   0   65.35   12.84 
  -2   5   0   70.00   12.14 
  -2   5   0   65.81   12.83 
   1  -5   0   91.42   16.86 
   1  -5   0   89.08   16.93 
   1  -5   0   94.05   17.05 
  -1   5   0   93.45   16.98 
   0  -5   0  427.77   75.01 
   0  -5   0  407.59   75.14 
   0  -5   0  382.66   74.99 
   0  -5   0  456.84   75.35 
   0   5   0  466.10   75.31 
  -1  -5   0   72.78   13.99 
  -1  -5   0   62.85   13.85 
  -1  -5   0   91.86   14.19 
  -1  -5   0   70.92   13.80 
   1   5   0   86.34   14.09 
  -2  -5   0    4.31    1.86 
  -2  -5   0   -0.19    1.23 
  -2  -5   0    5.27    2.00 
  -2  -5   0    7.42    1.82 
  -3  -5   0    4.46    2.84 
  -3  -5   0   10.93    3.18 
  -3  -5   0   11.17    2.61 
  -3  -5   0    7.84    2.33 
  -3  -5   0   12.05    2.59 
  -4  -5   0  201.44   32.17 
  -4  -5   0  165.76   32.08 
  -4  -5   0  192.88   32.49 
  -4  -5   0  192.30   32.17 
  -4  -5   0  152.59   32.41 
  -5  -5   0    1.37    1.60 
  -5  -5   0    3.18    2.25 
  -5  -5   0    8.36    1.70 
  -5  -5   0    2.76    2.18 
  -5  -5   0    9.07    1.68 
  -6  -5   0  220.64   35.28 
  -6  -5   0  203.96   36.04 
  -6  -5   0  209.23   35.27 
  -6  -5   0  167.74   35.54 
  -6  -5   0  184.01   35.81 
  -7  -5   0   34.23    7.38 
  -7  -5   0   36.59    6.58 
  -7  -5   0   32.16    7.14 
  -7  -5   0   29.66    6.79 
  -8  -5   0    3.40    2.51 
  -8  -5   0    3.22    1.71 
  -8  -5   0    5.09    1.46 
  -8  -5   0    1.70    1.57 
  -8  -5   0    2.97    2.05 
  -8  -5   0   -0.19    2.38 
  -9  -5   0    1.67    1.44 
  -9  -5   0    0.27    1.93 
  -9  -5   0   -1.85    2.09 
  -9  -5   0   -1.16    1.04 
  -9  -5   0   -1.61    1.26 
 -10  -5   0  208.31   31.65 
 -10  -5   0  160.51   30.30 
 -10  -5   0  180.07   30.61 
 -10  -5   0  184.76   30.65 
 -10  -5   0  182.54   30.58 
 -10  -5   0  153.03   30.27 
  10   5   0  194.26   31.49 
 -11  -5   0   83.39   18.76 
 -11  -5   0   85.38   17.46 
 -11  -5   0  110.64   17.34 
  11   5   0   88.02   18.85 
 -12  -5   0   46.37    8.14 
 -12  -5   0   40.57    7.78 
  12   5   0   36.94    9.58 
 -13  -5   0    4.18    1.66 
 -13  -5   0    1.93    1.63 
  13   5   0    3.12    3.88 
 -14  -5   0   19.60    3.99 
 -14  -5   0   11.45    3.65 
 -15  -5   0    5.84    2.95 
 -15  -5   0   16.75    3.60 
 -17  -5   0    4.17    1.38 
 -18  -5   0    0.14    0.91 
 -19  -5   0   -0.40    0.98 
  19  -6   0    2.58    1.63 
 -19   6   0    4.24    0.85 
 -19   6   0    1.45    0.95 
  18  -6   0    2.33    1.77 
 -18   6   0    3.84    0.91 
 -18   6   0    3.28    1.07 
  15  -6   0    4.54    3.13 
 -15   6   0    0.98    2.12 
 -15   6   0   -0.08    1.38 
 -15   6   0    0.19    0.56 
  14  -6   0    6.16    3.23 
 -14   6   0    3.83    1.82 
 -14   6   0    5.29    1.14 
 -14   6   0    4.87    2.11 
  13  -6   0    0.48    2.89 
 -13   6   0    2.09    1.69 
 -13   6   0    1.00    0.58 
 -13   6   0    1.07    1.42 
  12  -6   0   13.09    4.18 
 -12   6   0   15.98    2.78 
 -12   6   0   18.42    3.45 
 -12   6   0    9.84    3.33 
  11  -6   0    7.08    2.86 
 -11   6   0    3.94    1.98 
 -11   6   0   10.43    2.21 
 -11   6   0    7.21    1.41 
  10  -6   0    6.79    4.65 
  10  -6   0   10.14    3.33 
 -10   6   0   10.62    2.48 
 -10   6   0   11.05    2.41 
 -10   6   0    9.24    1.86 
 -10   6   0   13.86    5.47 
 -10   6   0    9.28    2.62 
   9  -6   0   22.97    5.68 
   9  -6   0   20.81    7.04 
  -9   6   0   23.95    4.50 
  -9   6   0   24.50    4.79 
  -9   6   0   32.16    7.84 
  -9   6   0   25.24    5.19 
  -9   6   0   30.45    4.89 
   8  -6   0   15.09    3.97 
   8  -6   0   12.06    5.15 
  -8   6   0   14.93    2.59 
  -8   6   0   13.85    3.40 
  -8   6   0   13.48    2.92 
  -8   6   0    9.21    4.53 
   7  -6   0    3.05    1.94 
   7  -6   0    1.70    2.93 
   7  -6   0    1.70    1.88 
   7  -6   0    2.94    3.28 
  -7   6   0    2.92    1.38 
  -7   6   0    3.96    3.28 
   6  -6   0   88.99   17.13 
   6  -6   0   80.00   15.04 
   6  -6   0   92.25   15.87 
   6  -6   0   76.51   14.98 
  -6   6   0   83.49   14.81 
  -6   6   0   84.23   16.09 
   5  -6   0   35.56    7.71 
   5  -6   0   33.18    8.53 
   5  -6   0   35.03    9.03 
   5  -6   0   38.05    7.79 
  -5   6   0   43.53    7.33 
  -5   6   0   42.83    9.12 
   4  -6   0    1.73    2.50 
   4  -6   0    1.84    1.85 
   4  -6   0    3.14    2.32 
   4  -6   0    3.54    1.90 
  -4   6   0    8.21    3.19 
  -4   6   0    5.01    1.64 
   3  -6   0    9.10    3.85 
   3  -6   0   19.32    3.25 
   3  -6   0   13.58    3.17 
   3  -6   0   13.84    4.04 
  -3   6   0   10.75    3.67 
  -3   6   0    8.27    2.65 
   2  -6   0    1.85    1.63 
   2  -6   0    2.78    2.41 
   2  -6   0    0.09    1.85 
   2  -6   0    1.09    1.46 
   2  -6   0    2.91    2.64 
  -2   6   0    0.38    1.11 
  -2   6   0    3.64    2.22 
   1  -6   0  144.69   25.23 
   1  -6   0  125.57   25.09 
   1  -6   0  151.77   25.50 
   1  -6   0  126.17   24.70 
  -1   6   0  160.96   25.46 
   0  -6   0   63.32   13.47 
   0  -6   0   72.19   13.20 
   0  -6   0   85.66   13.57 
   0  -6   0   76.28   13.12 
   0   6   0   62.25   13.40 
  -1  -6   0   -0.84    1.69 
  -1  -6   0   -0.01    2.23 
  -1  -6   0    1.66    1.75 
  -1  -6   0    1.69    1.74 
   1   6   0    0.79    1.71 
  -2  -6   0    7.12    2.27 
  -2  -6   0    4.24    1.81 
  -2  -6   0    3.35    1.86 
  -2  -6   0    4.49    2.18 
   2   6   0    4.80    2.17 
  -3  -6   0    3.19    1.71 
  -3  -6   0    0.74    1.35 
  -3  -6   0    4.04    2.41 
  -3  -6   0    3.27    2.38 
  -3  -6   0    1.61    1.40 
  -4  -6   0   75.63   12.87 
  -4  -6   0   62.96   12.32 
  -4  -6   0   73.31   12.57 
  -4  -6   0   63.90   12.90 
  -5  -6   0    2.22    2.19 
  -5  -6   0    1.04    1.19 
  -5  -6   0    1.46    1.09 
  -5  -6   0   -0.12    0.99 
  -5  -6   0   -0.20    1.88 
  -5  -6   0    1.62    1.38 
  -6  -6   0    3.53    1.30 
  -6  -6   0    1.20    1.32 
  -6  -6   0    2.84    2.54 
  -6  -6   0    3.84    2.01 
  -6  -6   0    4.13    2.45 
  -6  -6   0    2.60    1.36 
  -6  -6   0    6.15    1.65 
  -7  -6   0   59.68    9.37 
  -7  -6   0   56.65    9.39 
  -7  -6   0   63.42    9.73 
  -7  -6   0   41.03    9.06 
  -7  -6   0   44.01    9.09 
  -7  -6   0   60.87   10.57 
  -7  -6   0   71.90   11.07 
  -8  -6   0   24.64    4.90 
  -8  -6   0   24.45    4.90 
  -8  -6   0   32.80    6.82 
  -8  -6   0   25.64    5.86 
  -8  -6   0   30.26    6.51 
  -8  -6   0   30.39    5.55 
  -8  -6   0   33.89    5.57 
  -9  -6   0   70.42   10.95 
  -9  -6   0   71.44   12.54 
  -9  -6   0   53.20   11.10 
  -9  -6   0   62.78   10.94 
  -9  -6   0   68.67   12.83 
  -9  -6   0   51.97   11.26 
  -9  -6   0   53.24   11.26 
 -10  -6   0   13.24    5.00 
 -10  -6   0   13.90    3.65 
 -10  -6   0   13.73    3.45 
 -10  -6   0   15.79    3.41 
 -10  -6   0   17.89    4.97 
 -11  -6   0    4.64    3.56 
 -11  -6   0    1.61    1.26 
 -11  -6   0    7.02    2.03 
 -11  -6   0   13.73    2.49 
  11   6   0   10.20    3.74 
 -12  -6   0   14.82    3.28 
 -12  -6   0   20.50    4.10 
  12   6   0   15.64    4.76 
 -13  -6   0    9.29    2.35 
 -14  -6   0   17.51    3.85 
 -15  -6   0    4.63    1.92 
 -19   7   0    0.91    0.79 
  18  -7   0    2.03    1.53 
 -18   7   0   -0.16    0.53 
  17  -7   0    1.38    1.64 
 -17   7   0    1.89    0.76 
 -17   7   0    3.35    0.99 
 -15   7   0   10.04    2.13 
  14  -7   0    3.07    2.82 
 -14   7   0   -2.41    1.27 
 -14   7   0    1.74    0.63 
 -14   7   0    0.22    1.78 
  13  -7   0   17.07    4.76 
 -13   7   0   13.18    2.89 
 -13   7   0   13.57    2.33 
 -13   7   0    5.45    2.91 
  12  -7   0    3.50    2.76 
 -12   7   0    4.86    1.07 
 -12   7   0    5.25    2.03 
 -12   7   0    1.70    1.79 
  11  -7   0   10.10    4.17 
 -11   7   0   16.06    2.94 
 -11   7   0   14.67    3.48 
 -11   7   0   22.95    4.31 
  10  -7   0   10.82    3.56 
 -10   7   0   13.41    5.34 
 -10   7   0    9.87    1.86 
 -10   7   0    7.85    2.51 
 -10   7   0   12.30    2.59 
 -10   7   0    8.43    2.21 
   9  -7   0   12.48    3.44 
   9  -7   0   -0.47    3.52 
  -9   7   0    5.94    1.34 
  -9   7   0    4.29    3.98 
  -9   7   0    8.71    1.95 
  -9   7   0    9.38    1.92 
  -9   7   0    6.57    2.35 
   8  -7   0    2.82    3.91 
   8  -7   0    4.73    2.30 
  -8   7   0    5.57    1.50 
  -8   7   0    4.25    0.95 
  -8   7   0    6.75    2.18 
  -8   7   0    3.27    1.50 
  -8   7   0    3.83    4.20 
   7  -7   0   34.40    7.20 
   7  -7   0   33.86    7.39 
   7  -7   0   24.29    7.92 
   7  -7   0   39.14    9.09 
  -7   7   0   36.60    6.13 
  -7   7   0   23.49    8.02 
  -7   7   0   35.21    6.81 
   6  -7   0   23.50    4.86 
   6  -7   0   22.46    5.76 
   6  -7   0   20.71    4.69 
   6  -7   0   23.87    6.17 
  -6   7   0   17.11    4.04 
  -6   7   0   14.44    5.45 
   5  -7   0   69.70   13.78 
   5  -7   0   78.42   15.18 
   5  -7   0   53.93   14.81 
   5  -7   0   72.51   13.82 
  -5   7   0   81.70   15.05 
  -5   7   0   85.51   13.62 
   4  -7   0    7.69    2.68 
   4  -7   0    5.93    3.59 
   4  -7   0    9.28    2.99 
   4  -7   0   13.70    4.06 
  -4   7   0   12.30    4.42 
  -4   7   0   13.97    2.77 
   3  -7   0   22.66    5.90 
   3  -7   0   26.20    5.07 
   3  -7   0   23.72    5.18 
   3  -7   0   19.61    5.79 
  -3   7   0   21.94    6.12 
  -3   7   0   26.49    4.95 
   2  -7   0   -1.61    1.13 
   2  -7   0    3.04    1.52 
   2  -7   0    0.16    2.33 
   2  -7   0    0.63    2.41 
   2  -7   0   -1.15    2.24 
  -2   7   0    2.56    2.35 
  -2   7   0    1.30    1.35 
   1  -7   0   38.16    7.01 
   1  -7   0   39.22    8.38 
   1  -7   0   37.21    7.23 
   1  -7   0   39.29    8.24 
   1  -7   0   31.32    7.85 
  -1   7   0   40.29    8.37 
   0  -7   0   39.89    7.92 
   0  -7   0   43.89    7.18 
   0  -7   0   28.46    7.92 
   0  -7   0   41.88    7.76 
   0  -7   0   41.88    8.29 
   0   7   0   27.83    7.71 
  -1  -7   0    1.71    2.15 
  -1  -7   0    3.08    2.40 
  -1  -7   0    2.38    1.90 
  -1  -7   0   -0.43    1.74 
  -1  -7   0   -1.39    1.54 
   1   7   0    2.28    2.11 
  -2  -7   0    7.59    2.62 
  -2  -7   0    4.99    1.30 
  -2  -7   0    7.47    2.21 
  -2  -7   0   -0.42    1.03 
  -2  -7   0    5.41    2.30 
   2   7   0    3.81    2.15 
  -3  -7   0   -0.40    1.68 
  -3  -7   0    2.07    2.50 
  -3  -7   0    1.86    1.69 
  -3  -7   0    0.52    1.65 
  -3  -7   0    2.94    2.02 
  -3  -7   0    0.31    0.57 
  -3  -7   0    1.24    1.68 
  -4  -7   0    5.39    2.68 
  -4  -7   0    4.57    1.34 
  -4  -7   0    8.10    2.13 
  -4  -7   0    8.64    2.20 
  -4  -7   0    1.52    1.90 
  -4  -7   0   10.22    3.09 
  -4  -7   0    4.26    2.16 
  -4  -7   0   12.66    2.62 
  -5  -7   0   15.82    3.40 
  -5  -7   0   16.30    3.63 
  -5  -7   0   14.48    3.54 
  -5  -7   0   11.73    4.27 
  -5  -7   0   13.91    2.75 
  -6  -7   0    4.92    2.64 
  -6  -7   0    2.38    1.85 
  -6  -7   0    0.14    1.14 
  -6  -7   0   -0.51    0.95 
  -6  -7   0   -0.43    1.13 
  -6  -7   0    0.56    1.11 
  -6  -7   0    0.86    1.96 
  -7  -7   0    3.35    1.66 
  -7  -7   0    8.38    3.15 
  -7  -7   0    3.57    2.96 
  -7  -7   0   -0.17    1.15 
  -7  -7   0    4.56    1.97 
  -7  -7   0    9.94    1.93 
  -7  -7   0    2.80    1.77 
  -8  -7   0    4.08    1.85 
  -8  -7   0    8.18    1.88 
  -8  -7   0    9.30    1.89 
  -8  -7   0    0.39    2.52 
  -8  -7   0   -0.13    1.66 
  -8  -7   0    1.01    2.37 
  -8  -7   0    3.45    2.00 
  -9  -7   0    9.40    2.59 
  -9  -7   0   19.34    3.58 
  -9  -7   0   13.59    3.73 
  -9  -7   0   13.21    4.24 
  -9  -7   0   16.51    4.81 
  -9  -7   0   10.32    2.66 
  -9  -7   0   18.99    3.44 
 -10  -7   0   99.41   17.72 
 -10  -7   0   96.53   17.43 
 -10  -7   0   97.12   17.73 
 -10  -7   0  103.07   19.55 
 -10  -7   0  100.04   19.13 
 -11  -7   0   49.70    8.57 
 -11  -7   0   35.61    9.69 
 -11  -7   0   40.75    7.68 
 -11  -7   0   44.75    9.53 
 -12  -7   0   -0.27    2.98 
 -12  -7   0    1.07    1.60 
 -12  -7   0    0.05    0.81 
 -13  -7   0    6.55    1.78 
 -14  -7   0    2.32    1.22 
 -14  -7   0    3.52    2.47 
  18  -8   0    1.59    1.52 
  17  -8   0   -0.25    1.46 
 -17   8   0   -0.58    0.55 
 -16   8   0    0.13    0.59 
 -15   8   0    0.51    0.92 
 -15   8   0    0.84    0.79 
  14  -8   0   -0.70    2.67 
 -14   8   0   -0.09    1.93 
 -14   8   0    1.19    0.99 
  13  -8   0   27.17    7.77 
 -13   8   0   34.17    6.11 
 -13   8   0   39.28    7.44 
  12  -8   0    5.81    3.41 
 -12   8   0   10.56    2.66 
 -12   8   0    8.60    1.73 
 -12   8   0    8.37    2.81 
  11  -8   0    0.51    2.50 
 -11   8   0    6.89    2.10 
 -11   8   0    5.38    2.08 
 -11   8   0    4.50    1.15 
  10  -8   0    0.96    2.27 
 -10   8   0   -0.26    0.49 
 -10   8   0    1.24    1.40 
 -10   8   0    0.00    1.20 
 -10   8   0   -0.98    1.80 
   9  -8   0    9.18    3.73 
   9  -8   0    4.06    5.91 
  -9   8   0   14.02    5.86 
  -9   8   0   13.03    2.68 
  -9   8   0   13.54    2.36 
  -9   8   0   13.85    3.32 
  -9   8   0   10.49    2.72 
   8  -8   0    2.59    2.07 
   8  -8   0    4.08    3.92 
  -8   8   0    1.76    0.62 
  -8   8   0    3.67    1.20 
  -8   8   0    1.30    3.36 
  -8   8   0    0.05    1.32 
  -8   8   0    0.42    1.46 
   7  -8   0    5.56    4.19 
   7  -8   0    8.93    2.97 
   7  -8   0    4.45    4.69 
  -7   8   0    6.93    2.04 
  -7   8   0   10.39    4.50 
  -7   8   0   13.10    2.87 
  -7   8   0   10.04    1.71 
  -7   8   0    6.33    2.02 
   6  -8   0    2.13    2.11 
   6  -8   0   -2.82    3.31 
   6  -8   0    4.59    2.15 
   6  -8   0    1.72    2.75 
  -6   8   0    2.44    3.02 
  -6   8   0    4.31    1.60 
   5  -8   0   27.86    5.31 
   5  -8   0   30.46    5.54 
   5  -8   0   27.33    7.05 
   5  -8   0   19.74    5.94 
  -5   8   0   20.18    4.67 
  -5   8   0   16.76    6.07 
   4  -8   0    0.84    1.80 
   4  -8   0    1.08    3.00 
   4  -8   0   -2.06    2.71 
   4  -8   0   -3.87    1.06 
  -4   8   0    0.60    1.13 
  -4   8   0   -0.36    2.29 
   3  -8   0   51.43   10.31 
   3  -8   0   57.56   10.25 
   3  -8   0   61.96   12.02 
   3  -8   0   48.70   11.54 
  -3   8   0   56.36   10.11 
  -3   8   0   55.35   11.78 
   2  -8   0   -1.57    2.38 
   2  -8   0   -2.05    1.27 
   2  -8   0    2.15    2.45 
   2  -8   0    2.31    1.95 
  -2   8   0    0.34    1.40 
  -2   8   0    1.67    2.45 
   1  -8   0  104.54   18.84 
   1  -8   0  129.97   19.71 
   1  -8   0  108.51   19.93 
   1  -8   0  104.92   18.96 
   1  -8   0   91.88   19.59 
  -1   8   0  112.29   19.11 
  -1   8   0   86.15   19.73 
   0  -8   0   11.86    4.38 
   0  -8   0   19.76    3.56 
   0  -8   0   19.21    5.21 
   0  -8   0    9.85    4.24 
   0  -8   0   15.47    3.89 
   0   8   0   19.96    5.22 
  -1  -8   0   14.82    4.79 
  -1  -8   0   26.79    4.50 
  -1  -8   0   18.20    3.81 
  -1  -8   0   19.46    4.83 
  -1  -8   0   18.71    4.64 
  -1  -8   0   15.75    4.89 
   1   8   0   19.33    4.98 
  -2  -8   0   15.23    3.29 
  -2  -8   0   21.08    3.75 
  -2  -8   0   13.25    4.30 
  -2  -8   0   18.26    4.41 
  -2  -8   0   15.33    3.97 
  -3  -8   0   34.63    7.12 
  -3  -8   0   40.58    6.25 
  -3  -8   0   25.70    5.82 
  -3  -8   0   53.63    7.94 
  -4  -8   0    0.18    1.36 
  -4  -8   0    1.28    2.13 
  -4  -8   0    2.00    2.02 
  -4  -8   0   -0.44    1.15 
  -4  -8   0   -0.91    1.56 
  -4  -8   0   -0.83    1.28 
  -4  -8   0    0.45    0.50 
  -5  -8   0    9.15    2.62 
  -5  -8   0    6.81    2.10 
  -5  -8   0    8.44    3.36 
  -5  -8   0    1.78    1.97 
  -5  -8   0    7.93    1.53 
  -5  -8   0    5.07    3.37 
  -5  -8   0    6.55    2.18 
  -6  -8   0   19.14    4.70 
  -6  -8   0   24.89    4.08 
  -6  -8   0   13.22    2.79 
  -7  -8   0   54.45   10.24 
  -7  -8   0   48.52    8.74 
  -7  -8   0   40.79    8.04 
  -7  -8   0   49.06    8.67 
  -7  -8   0   49.79    8.74 
  -7  -8   0   52.38    8.68 
  -7  -8   0   50.14   10.29 
  -8  -8   0    0.45    1.19 
  -8  -8   0   -1.59    2.04 
  -8  -8   0   -0.10    1.52 
  -8  -8   0    3.51    1.77 
  -8  -8   0   -0.65    2.54 
  -9  -8   0   18.07    3.83 
  -9  -8   0   11.03    4.37 
  -9  -8   0   11.96    4.28 
  -9  -8   0   11.99    3.32 
 -10  -8   0   27.95    5.55 
 -10  -8   0   19.37    6.32 
 -10  -8   0   14.29    6.04 
 -10  -8   0   30.72    5.62 
 -11  -8   0   -0.37    3.39 
 -11  -8   0    0.17    2.13 
 -11  -8   0   -3.62    3.02 
 -11  -8   0   -0.88    1.81 
 -11  -8   0    5.20    1.54 
 -12  -8   0    6.81    1.86 
 -12  -8   0    5.40    2.58 
 -12  -8   0    6.87    3.91 
 -13  -8   0    3.76    3.53 
 -13  -8   0    0.74    1.93 
 -13  -8   0    4.64    1.75 
 -14  -8   0    0.82    1.25 
 -14  -8   0    0.80    1.54 
 -17   9   0    0.28    0.54 
  16  -9   0    3.33    1.78 
 -16   9   0    2.93    0.87 
  15  -9   0   -1.29    1.52 
 -15   9   0    0.00    0.59 
 -15   9   0    0.37    0.88 
  14  -9   0    0.15    1.60 
 -14   9   0    1.23    0.83 
 -14   9   0    0.50    0.93 
  13  -9   0    6.98    4.24 
  12  -9   0    5.18    3.25 
 -12   9   0    4.46    2.24 
  11  -9   0    0.92    2.70 
 -11   9   0    3.45    0.83 
 -11   9   0   -0.02    1.94 
  10  -9   0   40.66    7.92 
 -10   9   0   25.09    5.76 
 -10   9   0   29.93    5.45 
 -10   9   0   35.03    5.86 
   9  -9   0   -1.95    1.96 
  -9   9   0    2.04    0.66 
  -9   9   0   -1.88    1.38 
  -9   9   0    1.28    1.07 
  -9   9   0   -1.04    1.13 
   8  -9   0    8.88    5.44 
   8  -9   0   12.97    4.19 
  -8   9   0   11.17    3.11 
  -8   9   0   15.22    2.86 
  -8   9   0   12.39    2.81 
  -8   9   0   12.27    2.36 
   7  -9   0    8.49    3.71 
   7  -9   0    6.43    4.74 
  -7   9   0   13.28    3.55 
  -7   9   0   17.06    2.84 
  -7   9   0   20.17    3.41 
  -7   9   0   14.77    3.05 
   6  -9   0    9.88    3.78 
   6  -9   0    8.70    5.30 
   6  -9   0   16.35    4.03 
   6  -9   0   18.27    6.28 
  -6   9   0   15.66    3.19 
  -6   9   0   15.90    3.58 
  -6   9   0   16.33    3.32 
  -6   9   0   16.19    2.86 
   5  -9   0    8.15    3.72 
   5  -9   0    0.34    3.57 
   5  -9   0    0.12    1.81 
   5  -9   0    3.36    2.19 
  -5   9   0    2.59    1.37 
   4  -9   0   46.54    8.85 
   4  -9   0   41.78    8.51 
   4  -9   0   38.02    9.85 
   4  -9   0   38.82    9.58 
  -4   9   0   44.59    8.14 
   3  -9   0    4.89    2.28 
   3  -9   0    1.40    3.45 
   3  -9   0    1.72    2.01 
   3  -9   0    5.25    3.12 
   2  -9   0    6.77    2.59 
   2  -9   0   10.40    3.75 
   2  -9   0    6.75    3.64 
   2  -9   0    7.08    2.24 
   1  -9   0   54.35   10.53 
   1  -9   0   53.88   10.94 
   1  -9   0   46.37    8.99 
   1  -9   0   46.17    9.13 
   0  -9   0   19.19    4.66 
   0  -9   0   15.98    5.65 
   0  -9   0   25.42    5.23 
   0  -9   0   23.95    5.84 
   0  -9   0   24.85    4.87 
   0  -9   0   22.68    6.27 
   0  -9   0   29.75    4.83 
  -1  -9   0  129.17   23.17 
  -1  -9   0  132.55   23.43 
  -1  -9   0  125.22   23.82 
  -1  -9   0  126.00   24.14 
  -1  -9   0  137.36   24.36 
  -1  -9   0  137.65   23.86 
  -1  -9   0  129.19   23.22 
  -2  -9   0    1.63    2.09 
  -2  -9   0    0.90    1.32 
  -2  -9   0   -1.11    1.66 
  -2  -9   0    1.18    0.95 
  -2  -9   0   -2.14    1.13 
  -2  -9   0   -0.83    1.71 
  -2  -9   0    3.77    2.99 
  -3  -9   0   -0.27    2.12 
  -3  -9   0   11.33    3.49 
  -3  -9   0    6.12    2.22 
  -3  -9   0    9.68    2.93 
  -3  -9   0    7.18    3.06 
  -3  -9   0    9.63    1.89 
  -4  -9   0   -0.05    1.80 
  -4  -9   0   -2.96    1.38 
  -4  -9   0    2.20    1.37 
  -4  -9   0    1.17    0.96 
  -4  -9   0   -1.87    2.28 
  -4  -9   0   -1.38    2.57 
  -4  -9   0   -1.70    1.74 
  -5  -9   0    0.97    0.78 
  -5  -9   0    2.19    2.24 
  -5  -9   0    1.92    1.84 
  -5  -9   0   -0.25    1.39 
  -5  -9   0    0.26    1.22 
  -5  -9   0   -1.11    2.11 
  -6  -9   0   53.00   10.15 
  -6  -9   0   51.27   10.35 
  -6  -9   0   58.84   11.78 
  -6  -9   0   54.28   10.61 
  -6  -9   0   54.82    9.77 
  -6  -9   0   68.64   12.11 
  -7  -9   0   16.07    4.81 
  -7  -9   0   14.19    3.33 
  -7  -9   0   12.08    3.50 
  -7  -9   0   14.88    2.78 
  -7  -9   0   13.08    3.64 
  -7  -9   0   10.64    4.71 
  -8  -9   0   42.02    8.04 
  -8  -9   0   44.57    7.98 
  -8  -9   0   37.77    7.14 
  -8  -9   0   38.91    9.00 
  -8  -9   0   52.00    9.75 
  -8  -9   0   41.10    8.17 
  -9  -9   0   -0.28    1.28 
  -9  -9   0    0.90    1.44 
  -9  -9   0    4.54    3.58 
  -9  -9   0    1.81    2.09 
  -9  -9   0    0.34    0.44 
  -9  -9   0    4.19    3.53 
 -10  -9   0   39.95    7.87 
 -10  -9   0   37.81    9.53 
 -10  -9   0   41.36    7.96 
 -10  -9   0   31.87    8.85 
 -11  -9   0    5.45    2.01 
 -11  -9   0    2.87    3.57 
 -11  -9   0    8.60    2.76 
 -11  -9   0    0.58    1.37 
 -11  -9   0   13.38    4.46 
 -12  -9   0    4.33    1.73 
 -12  -9   0    1.01    3.75 
 -12  -9   0    4.82    2.44 
 -13  -9   0    1.34    1.24 
 -13  -9   0    3.38    1.33 
 -13  -9   0    0.07    1.97 
 -13  -9   0    0.16    1.16 
 -13  -9   0   -0.02    3.00 
 -14  -9   0    3.17    1.26 
 -14  -9   0    1.21    1.55 
 -14  -9   0    1.17    1.80 
 -15  -9   0    5.42    2.85 
 -17  10   0    0.24    0.21 
  16 -10   0    3.13    1.37 
 -16  10   0    3.24    1.05 
 -16  10   0    3.01    0.59 
 -16  10   0    2.60    0.84 
  15 -10   0    1.60    1.67 
 -15  10   0    1.69    0.76 
 -15  10   0    3.11    0.82 
  14 -10   0   13.31    2.71 
 -14  10   0    7.76    1.91 
  13 -10   0    1.24    1.71 
 -13  10   0    3.43    1.09 
 -13  10   0    2.53    0.83 
  12 -10   0    8.73    4.07 
  12 -10   0    4.36    2.22 
 -12  10   0    8.95    1.62 
  11 -10   0    4.96    3.21 
  10 -10   0   26.36    6.47 
   9 -10   0   17.95    5.96 
  -9  10   0   30.21    5.19 
   8 -10   0   11.05    3.45 
  -8  10   0    6.79    2.06 
   7 -10   0    8.79    3.61 
   7 -10   0    3.78    4.82 
  -7  10   0    9.05    2.18 
  -7  10   0   10.51    1.89 
   6 -10   0    1.87    2.28 
   6 -10   0    0.50    2.38 
   6 -10   0    0.55    3.51 
  -6  10   0    0.99    0.69 
  -6  10   0    2.28    1.12 
   5 -10   0    8.05    3.17 
   5 -10   0   11.97    5.28 
   5 -10   0    2.00    2.13 
   5 -10   0    3.26    3.25 
  -5  10   0    5.52    1.48 
   4 -10   0    1.16    2.09 
   4 -10   0    1.20    3.96 
   4 -10   0    0.12    3.29 
   4 -10   0    1.11    2.18 
   3 -10   0   14.08    5.10 
   3 -10   0   15.26    4.34 
   3 -10   0   16.17    5.75 
   3 -10   0   18.02    4.15 
   2 -10   0   71.63   12.64 
   2 -10   0   53.95   10.56 
   2 -10   0   54.30   11.01 
   2 -10   0   54.59   11.86 
   1 -10   0    2.58    1.85 
   1 -10   0    3.09    3.04 
   1 -10   0    6.42    2.55 
   1 -10   0    0.44    2.38 
   0 -10   0   49.39   10.69 
   0 -10   0   70.24   11.94 
   0 -10   0   50.01    9.68 
   0 -10   0   47.48    9.08 
   0 -10   0   47.91    9.12 
   0 -10   0   41.94   10.10 
   0  10   0   48.88    9.91 
  -1 -10   0   -0.12    2.34 
  -1 -10   0    1.81    2.19 
  -1 -10   0   -2.00    1.06 
  -1 -10   0   -0.67    2.41 
  -1 -10   0    2.00    1.09 
  -1 -10   0    0.84    2.32 
  -2 -10   0   13.78    3.39 
  -2 -10   0   13.49    4.12 
  -2 -10   0   10.53    4.23 
  -2 -10   0   15.24    3.15 
  -2 -10   0   16.27    5.05 
  -2 -10   0   15.39    4.40 
  -2 -10   0   15.90    3.89 
  -3 -10   0   -0.70    1.43 
  -3 -10   0   -0.93    1.71 
  -3 -10   0   -2.51    1.95 
  -3 -10   0    0.22    1.97 
  -3 -10   0    0.40    1.07 
  -3 -10   0    1.44    1.88 
  -4 -10   0    0.86    1.05 
  -4 -10   0    1.62    1.33 
  -4 -10   0    1.02    1.96 
  -4 -10   0   -1.99    2.32 
  -4 -10   0    4.98    2.25 
  -4 -10   0   -2.55    2.01 
  -5 -10   0   19.27    5.92 
  -5 -10   0   19.40    5.07 
  -5 -10   0   22.14    4.01 
  -5 -10   0   18.63    4.37 
  -5 -10   0   19.65    4.63 
  -5 -10   0   15.83    5.57 
  -6 -10   0    3.52    2.33 
  -6 -10   0    8.17    2.38 
  -6 -10   0    7.71    3.39 
  -6 -10   0    3.92    1.32 
  -6 -10   0    2.42    2.63 
  -6 -10   0    3.63    2.45 
  -7 -10   0    1.21    1.36 
  -7 -10   0    3.08    2.96 
  -7 -10   0    1.06    0.84 
  -7 -10   0    0.83    2.14 
  -7 -10   0    3.26    2.43 
  -7 -10   0    1.63    1.81 
  -8 -10   0   17.37    3.84 
  -8 -10   0    5.80    3.71 
  -8 -10   0    8.32    3.28 
  -8 -10   0    9.80    4.07 
  -8 -10   0    9.58    2.99 
  -9 -10   0   -0.59    1.34 
  -9 -10   0    2.26    0.76 
  -9 -10   0    0.21    3.14 
  -9 -10   0   -2.15    2.45 
  -9 -10   0    1.75    2.23 
  -9 -10   0    2.06    1.78 
 -10 -10   0   62.40   12.65 
 -10 -10   0   65.37   11.04 
 -10 -10   0   65.36   13.24 
 -10 -10   0   60.53   11.03 
 -10 -10   0   63.64   11.31 
 -10 -10   0   52.48   10.10 
 -11 -10   0    6.34    2.44 
 -11 -10   0    4.84    2.93 
 -11 -10   0    5.65    3.96 
 -11 -10   0    8.89    4.39 
 -11 -10   0    7.41    2.69 
 -12 -10   0   22.19    4.47 
 -12 -10   0   16.04    6.55 
 -12 -10   0   21.72    3.90 
 -12 -10   0   13.46    4.21 
 -12 -10   0   16.59    3.58 
 -12 -10   0   17.90    4.56 
 -13 -10   0    4.47    2.42 
 -13 -10   0    2.01    1.31 
 -13 -10   0    1.80    1.53 
 -13 -10   0    2.08    1.40 
 -13 -10   0    3.29    3.65 
 -14 -10   0    3.14    4.92 
 -14 -10   0    2.85    1.78 
 -14 -10   0    3.80    1.40 
 -14 -10   0   -1.10    1.26 
 -14 -10   0    2.71    1.67 
 -15 -10   0   -1.43    1.43 
 -16  11   0   -0.21    0.29 
 -16  11   0   -0.12    0.59 
  15 -11   0    0.05    1.53 
 -15  11   0    0.62    0.33 
  14 -11   0    2.33    1.63 
 -14  11   0    1.35    0.38 
 -14  11   0    0.49    0.62 
 -14  11   0    0.09    0.90 
  13 -11   0    2.06    1.75 
 -13  11   0    1.34    0.46 
 -13  11   0    2.08    0.72 
 -13  11   0    1.13    0.96 
  12 -11   0    0.21    1.56 
 -12  11   0    1.05    0.66 
 -12  11   0   -0.12    0.89 
 -12  11   0    0.49    0.49 
  11 -11   0    0.76    2.83 
  11 -11   0   -0.09    1.58 
 -11  11   0   -1.47    0.54 
  10 -11   0   28.33    4.66 
  10 -11   0   11.12    5.08 
 -10  11   0   20.26    3.76 
   9 -11   0   -0.48    3.15 
   9 -11   0   -0.52    1.38 
  -9  11   0    0.01    1.23 
  -9  11   0    1.00    0.61 
   8 -11   0    3.26    2.67 
  -8  11   0   11.63    1.92 
  -8  11   0    4.03    1.17 
   7 -11   0   23.31    6.97 
  -7  11   0   39.80    6.25 
  -7  11   0   31.72    5.91 
   6 -11   0   17.09    4.72 
   6 -11   0   26.72    8.54 
   6 -11   0   26.04    5.13 
  -6  11   0   15.77    3.47 
  -6  11   0   25.27    3.82 
   5 -11   0    6.84    3.21 
   5 -11   0    0.71    4.13 
   5 -11   0    1.86    1.17 
   5 -11   0    0.47    2.48 
   5 -11   0    0.88    3.54 
  -5  11   0    2.69    0.82 
  -5  11   0    3.11    1.38 
   4 -11   0   23.31    4.84 
   4 -11   0   28.02    5.86 
   4 -11   0   20.55    7.55 
   4 -11   0   23.91    5.84 
   4 -11   0   32.01    8.48 
   4 -11   0   29.18    5.00 
  -4  11   0   26.09    4.86 
   3 -11   0   10.44    2.98 
   3 -11   0    1.20    3.69 
   3 -11   0   14.73    3.82 
   3 -11   0    3.18    4.15 
  -3  11   0   11.22    2.33 
   2 -11   0    9.96    3.32 
   2 -11   0   14.33    4.91 
   2 -11   0    9.97    3.22 
   2 -11   0    9.66    4.83 
   1 -11   0    0.91    2.03 
   1 -11   0    5.82    2.99 
   1 -11   0    6.61    2.98 
   1 -11   0    5.04    3.59 
   0 -11   0   13.12    3.62 
   0 -11   0    3.61    4.12 
  -1 -11   0   -4.63    2.51 
  -1 -11   0    2.31    1.39 
  -1 -11   0   -3.78    1.89 
  -1 -11   0    0.00    1.12 
  -1 -11   0    4.24    3.09 
  -2 -11   0   12.84    2.89 
  -2 -11   0   13.57    4.17 
  -2 -11   0   13.78    3.71 
  -2 -11   0    8.55    2.45 
  -2 -11   0    4.92    3.63 
  -2 -11   0    7.10    3.68 
  -3 -11   0   47.05    8.25 
  -3 -11   0   40.21    8.00 
  -3 -11   0   41.73    9.42 
  -3 -11   0   43.50   10.13 
  -3 -11   0   41.23    8.66 
  -3 -11   0   49.67   10.06 
  -4 -11   0   85.56   16.77 
  -4 -11   0  121.72   18.45 
  -4 -11   0   98.92   17.09 
  -4 -11   0   90.38   18.00 
  -4 -11   0   90.65   18.80 
  -4 -11   0   96.89   17.34 
  -5 -11   0   14.68    5.95 
  -5 -11   0   21.62    4.22 
  -5 -11   0   21.68    4.80 
  -5 -11   0   20.66    5.70 
  -5 -11   0   22.37    6.15 
  -5 -11   0   19.48    5.06 
  -6 -11   0   24.14    4.36 
  -6 -11   0   24.22    5.87 
  -6 -11   0   20.15    4.88 
  -6 -11   0   19.45    6.54 
  -6 -11   0   25.44    6.91 
  -6 -11   0   19.36    5.10 
  -7 -11   0   -0.79    1.83 
  -7 -11   0    2.85    1.92 
  -7 -11   0   -0.80    2.71 
  -7 -11   0    1.65    2.35 
  -7 -11   0   -5.38    2.07 
  -7 -11   0    0.52    0.93 
  -8 -11   0   -2.29    1.58 
  -8 -11   0    0.21    1.70 
  -8 -11   0    0.42    2.95 
  -8 -11   0    1.28    0.93 
  -8 -11   0   -2.24    1.54 
  -8 -11   0   -1.04    3.48 
  -9 -11   0   14.65    4.37 
  -9 -11   0   21.80    4.72 
  -9 -11   0   17.59    5.69 
  -9 -11   0   15.99    3.90 
  -9 -11   0   14.54    3.16 
  -9 -11   0   18.72    6.10 
 -10 -11   0   15.85    4.07 
 -10 -11   0   16.35    2.91 
 -10 -11   0   17.50    4.37 
 -10 -11   0    4.74    4.86 
 -10 -11   0    5.63    4.56 
 -10 -11   0   12.17    4.00 
 -11 -11   0   11.74    5.39 
 -11 -11   0   16.28    4.17 
 -11 -11   0   18.48    3.88 
 -11 -11   0   10.28    4.03 
 -11 -11   0   13.37    3.95 
 -11 -11   0   14.04    3.10 
 -11 -11   0   14.91    2.89 
 -11 -11   0   16.64    5.62 
 -12 -11   0    8.68    4.97 
 -12 -11   0    2.10    1.20 
 -12 -11   0    0.80    3.21 
 -12 -11   0    3.42    1.97 
 -12 -11   0    2.78    2.71 
 -12 -11   0    2.44    2.34 
 -12 -11   0    2.45    1.63 
 -12 -11   0    1.33    0.78 
 -13 -11   0    6.93    1.95 
 -13 -11   0   10.80    2.86 
 -13 -11   0    3.70    2.82 
 -13 -11   0   -0.08    4.49 
 -13 -11   0    7.46    1.83 
 -14 -11   0    1.27    2.09 
 -14 -11   0    0.81    1.68 
 -14 -11   0    4.13    1.56 
 -14 -11   0    1.90    3.91 
 -14 -11   0    5.32    2.01 
 -15 -11   0    0.69    1.29 
 -15 -11   0    0.84    1.98 
 -15 -11   0    0.26    0.99 
  15 -12   0    1.63    1.52 
 -15  12   0   -0.30    0.21 
 -15  12   0   -0.27    0.56 
  14 -12   0   -0.33    1.44 
 -14  12   0   -0.66    0.81 
  13 -12   0    2.91    1.94 
 -13  12   0    5.68    1.23 
  12 -12   0   20.95    4.39 
 -12  12   0   20.28    3.82 
  11 -12   0    2.43    1.75 
 -11  12   0    2.67    1.12 
 -11  12   0    2.92    0.64 
 -11  12   0    3.19    1.18 
  10 -12   0    5.63    3.98 
  10 -12   0    4.79    1.85 
 -10  12   0    2.41    1.09 
   9 -12   0    0.55    2.70 
   9 -12   0    0.88    1.47 
  -9  12   0   -0.28    1.54 
  -9  12   0    2.27    0.94 
   8 -12   0    8.08    2.03 
   8 -12   0    8.16    3.88 
  -8  12   0    4.29    1.44 
  -8  12   0    7.71    1.83 
   7 -12   0    1.39    2.51 
   7 -12   0    1.74    1.79 
  -7  12   0    2.53    1.27 
   6 -12   0   16.24    4.82 
   6 -12   0   15.13    3.53 
  -6  12   0   16.63    3.44 
   5 -12   0   81.40   15.88 
   5 -12   0   92.14   16.05 
   5 -12   0   82.18   15.12 
   5 -12   0   84.39   15.11 
  -5  12   0   86.37   15.10 
   4 -12   0    9.73    6.02 
   4 -12   0   22.35    4.76 
   4 -12   0   12.05    4.08 
   4 -12   0   15.99    3.24 
  -4  12   0   14.76    3.07 
   3 -12   0    0.76    3.06 
   3 -12   0    5.73    3.02 
   3 -12   0    4.33    2.80 
   3 -12   0    4.29    1.61 
  -3  12   0    3.73    1.54 
   2 -12   0   17.46    6.40 
   2 -12   0   19.54    3.38 
   2 -12   0   10.76    4.01 
  -2  12   0   14.99    3.17 
   1 -12   0    0.72    2.19 
   1 -12   0    5.21    4.41 
  -1  12   0    3.82    1.48 
   0 -12   0    1.63    2.22 
   0 -12   0    5.28    3.63 
  -1 -12   0    0.25    1.87 
  -1 -12   0    0.45    3.98 
  -2 -12   0    3.69    2.83 
  -2 -12   0    3.68    1.54 
  -2 -12   0    4.24    1.94 
  -2 -12   0    1.51    3.38 
  -2 -12   0    3.90    3.27 
  -3 -12   0    7.81    3.80 
  -3 -12   0   11.08    3.66 
  -3 -12   0   10.41    4.45 
  -3 -12   0   10.97    4.78 
  -3 -12   0   12.04    2.80 
  -3 -12   0   11.29    3.05 
  -4 -12   0  103.22   19.51 
  -4 -12   0  112.47   19.10 
  -4 -12   0   93.45   19.24 
  -4 -12   0   89.38   20.88 
  -4 -12   0  106.20   21.07 
  -4 -12   0  144.54   21.07 
  -5 -12   0    0.43    2.63 
  -5 -12   0    1.83    2.51 
  -5 -12   0    0.33    1.24 
  -5 -12   0    0.80    2.12 
  -5 -12   0    2.59    1.94 
  -5 -12   0    3.54    4.02 
  -6 -12   0    8.56    3.03 
  -6 -12   0    8.13    3.54 
  -6 -12   0    6.67    4.30 
  -6 -12   0    9.27    4.15 
  -6 -12   0    8.54    3.97 
  -6 -12   0   11.87    2.44 
  -7 -12   0   38.90    6.13 
  -7 -12   0   33.26    7.61 
  -7 -12   0   30.34    8.10 
  -7 -12   0   25.74    8.24 
  -7 -12   0   26.93    6.99 
  -7 -12   0   25.57    6.55 
  -8 -12   0    3.66    2.53 
  -8 -12   0    4.15    2.09 
  -8 -12   0   11.47    3.61 
  -8 -12   0    4.90    4.44 
  -8 -12   0   -1.86    2.72 
  -8 -12   0    9.23    1.81 
  -9 -12   0   -0.66    3.18 
  -9 -12   0    1.73    1.71 
  -9 -12   0    1.00    1.73 
  -9 -12   0    6.96    2.93 
  -9 -12   0    3.20    1.27 
  -9 -12   0    4.16    2.23 
  -9 -12   0   -0.04    2.97 
 -10 -12   0    2.35    2.25 
 -10 -12   0    2.25    1.33 
 -10 -12   0    2.02    2.33 
 -10 -12   0    3.36    1.21 
 -10 -12   0    2.73    2.18 
 -10 -12   0    0.89    0.96 
 -10 -12   0    4.04    3.85 
 -10 -12   0    4.40    4.38 
 -11 -12   0    0.02    1.11 
 -11 -12   0    1.31    0.86 
 -11 -12   0   -0.46    2.48 
 -11 -12   0   -2.76    3.38 
 -11 -12   0    0.94    2.98 
 -11 -12   0   -0.06    1.68 
 -11 -12   0   -0.04    1.13 
 -11 -12   0    0.27    1.63 
 -11 -12   0   -0.44    1.19 
 -12 -12   0    3.81    1.65 
 -12 -12   0    2.60    1.37 
 -12 -12   0   -1.19    1.66 
 -12 -12   0    0.44    1.96 
 -12 -12   0    3.66    3.82 
 -12 -12   0    2.63    4.11 
 -12 -12   0    0.84    0.93 
 -12 -12   0    0.06    2.49 
 -13 -12   0    4.47    2.37 
 -13 -12   0    1.72    2.21 
 -13 -12   0    6.24    2.07 
 -13 -12   0    7.01    1.57 
 -13 -12   0    2.54    3.80 
 -13 -12   0    9.89    2.01 
 -14 -12   0    1.44    0.86 
 -14 -12   0    2.75    2.51 
 -14 -12   0   -0.04    1.13 
 -14 -12   0    2.10    2.35 
 -14 -12   0    1.30    1.38 
 -15 -12   0    1.59    1.50 
 -15 -12   0    2.96    1.54 
 -15 -12   0   -0.42    1.96 
 -16 -12   0    4.99    2.24 
 -16 -12   0    0.76    1.12 
 -16 -12   0    0.34    1.35 
  14 -13   0    2.68    1.56 
 -14  13   0    1.67    0.41 
 -14  13   0    2.29    0.74 
  13 -13   0    8.03    2.40 
 -13  13   0    9.30    1.57 
 -13  13   0    7.27    1.83 
  12 -13   0    0.01    1.58 
 -12  13   0    1.51    0.96 
 -12  13   0    1.76    0.44 
  11 -13   0    1.78    1.66 
 -11  13   0    0.73    0.92 
  10 -13   0    1.88    1.73 
 -10  13   0    2.08    0.49 
 -10  13   0    1.02    0.99 
   9 -13   0   -0.44    2.80 
   9 -13   0    3.43    1.66 
  -9  13   0    1.14    1.32 
   8 -13   0   -1.41    2.62 
   8 -13   0    2.44    1.53 
  -8  13   0    0.85    1.31 
   7 -13   0    2.14    1.49 
   7 -13   0    0.15    2.66 
  -7  13   0    2.93    1.54 
   6 -13   0    5.06    3.18 
   6 -13   0    7.09    1.98 
  -6  13   0    6.70    1.87 
   5 -13   0    8.91    3.74 
   5 -13   0   13.32    2.70 
  -5  13   0    9.44    2.32 
   4 -13   0    2.00    2.50 
   4 -13   0   -3.56    5.03 
   4 -13   0    0.19    1.54 
  -4  13   0    1.93    1.11 
   3 -13   0   83.21   14.97 
   3 -13   0   89.55   16.05 
  -3  13   0   82.82   14.96 
   2 -13   0   20.73    3.54 
   2 -13   0   11.63    4.40 
   2 -13   0   12.10    5.97 
  -2  13   0   16.62    3.43 
   1 -13   0    9.12    2.29 
   1 -13   0   15.17    4.25 
   1 -13   0    6.17    5.69 
  -1  13   0    9.48    2.23 
   0 -13   0   11.51    6.18 
   0 -13   0   19.36    4.47 
   0 -13   0   10.37    2.90 
   0  13   0   17.19    3.08 
  -1 -13   0    4.79    1.72 
  -1 -13   0    2.98    2.44 
  -1 -13   0    7.87    4.89 
   1  13   0    3.26    1.31 
  -2 -13   0    2.25    2.74 
  -2 -13   0    2.60    1.51 
  -2 -13   0    0.61    3.77 
  -2 -13   0    2.62    1.37 
   2  13   0    2.83    1.21 
  -3 -13   0    8.81    4.34 
  -3 -13   0    9.47    4.02 
  -3 -13   0    8.40    2.57 
  -3 -13   0   13.10    3.16 
  -3 -13   0   17.95    4.06 
  -4 -13   0    5.78    2.24 
  -4 -13   0    9.56    4.05 
  -4 -13   0    7.47    3.13 
  -4 -13   0    3.47    1.77 
  -4 -13   0   -0.02    2.74 
  -5 -13   0    1.74    3.04 
  -5 -13   0    2.16    1.17 
  -5 -13   0    7.05    4.23 
  -5 -13   0    3.91    2.09 
  -5 -13   0    3.78    2.37 
  -5 -13   0   -1.53    2.71 
  -6 -13   0    1.07    1.35 
  -6 -13   0    1.82    2.02 
  -6 -13   0    1.51    2.29 
  -6 -13   0    5.07    2.97 
  -6 -13   0    1.51    3.00 
  -6 -13   0   -2.00    3.08 
  -7 -13   0    5.31    3.68 
  -7 -13   0    2.09    2.48 
  -7 -13   0    2.63    2.27 
  -7 -13   0    9.03    3.53 
  -7 -13   0    3.53    3.48 
  -7 -13   0   -1.96    2.28 
  -7 -13   0    0.54    1.16 
  -8 -13   0    2.45    1.35 
  -8 -13   0    0.21    1.02 
  -8 -13   0    1.74    1.19 
  -8 -13   0   -0.56    3.05 
  -8 -13   0    4.45    1.40 
  -8 -13   0   -0.73    2.51 
  -8 -13   0   -2.14    2.22 
  -8 -13   0    1.72    2.73 
  -8 -13   0    3.90    2.15 
  -9 -13   0    7.11    3.13 
  -9 -13   0    3.67    3.11 
  -9 -13   0    4.18    2.98 
  -9 -13   0    5.81    1.68 
  -9 -13   0    4.34    4.44 
  -9 -13   0    2.20    2.47 
  -9 -13   0    6.68    1.66 
  -9 -13   0    5.12    1.52 
  -9 -13   0    6.47    1.69 
 -10 -13   0    5.29    2.45 
 -10 -13   0    6.13    1.50 
 -10 -13   0    8.72    1.79 
 -10 -13   0    2.82    2.51 
 -10 -13   0    0.83    2.42 
 -10 -13   0    7.84    1.86 
 -10 -13   0    2.67    1.46 
 -10 -13   0    2.35    4.48 
 -10 -13   0   14.74    5.59 
 -11 -13   0   26.03    6.51 
 -11 -13   0   26.64    5.14 
 -11 -13   0   30.22    5.34 
 -11 -13   0   22.04    6.44 
 -11 -13   0   19.26    7.38 
 -11 -13   0   21.80    7.41 
 -11 -13   0   20.09    5.93 
 -11 -13   0   28.87    5.17 
 -11 -13   0   30.42    5.27 
 -12 -13   0    2.21    1.07 
 -12 -13   0    3.05    2.22 
 -12 -13   0    4.06    1.56 
 -12 -13   0    1.34    1.22 
 -12 -13   0    6.91    1.86 
 -12 -13   0    5.82    2.51 
 -12 -13   0    3.44    5.11 
 -12 -13   0   -0.65    4.15 
 -12 -13   0    1.20    2.33 
 -13 -13   0   41.10    7.09 
 -13 -13   0   29.69    8.87 
 -13 -13   0   41.15    6.94 
 -13 -13   0   36.20    6.91 
 -13 -13   0   17.52   10.78 
 -13 -13   0   40.16    8.46 
 -13 -13   0   28.27    7.73 
 -14 -13   0    8.90    1.78 
 -14 -13   0    1.51    2.43 
 -14 -13   0    5.53    1.97 
 -14 -13   0    5.45    1.85 
 -15 -13   0    0.03    1.12 
 -15 -13   0   -0.38    1.58 
 -15 -13   0   -1.40    2.39 
 -15 -13   0    2.76    1.02 
 -16 -13   0    0.68    1.40 
 -16 -13   0    0.99    2.20 
 -16 -13   0   -0.93    1.36 
 -17 -13   0    2.07    1.35 
 -14  14   0    1.12    0.30 
 -14  14   0    1.76    0.82 
  13 -14   0    0.21    1.47 
 -13  14   0    2.31    0.92 
  12 -14   0    4.00    1.67 
 -12  14   0    1.22    0.40 
 -12  14   0    0.92    0.70 
  11 -14   0    1.80    1.68 
 -11  14   0    3.28    1.10 
  10 -14   0    9.19    3.04 
 -10  14   0   14.30    2.40 
 -10  14   0   13.52    2.66 
   9 -14   0    1.41    1.63 
  -9  14   0    0.62    0.44 
   8 -14   0   -0.91    1.48 
  -8  14   0   -1.25    1.50 
  -7  14   0    3.88    1.60 
  -6  14   0    2.76    1.39 
   5 -14   0   11.96    2.68 
   5 -14   0   12.71    4.78 
  -5  14   0   11.22    2.58 
   4 -14   0    3.15    2.82 
   4 -14   0    1.55    1.66 
  -4  14   0    2.33    1.26 
   3 -14   0   14.05    4.66 
   3 -14   0   16.67    3.21 
  -3  14   0   11.63    3.05 
   2 -14   0   77.07   13.94 
   2 -14   0   63.13   17.30 
   2 -14   0   81.44   15.02 
  -2  14   0   79.37   13.94 
   1 -14   0   10.86    4.45 
   1 -14   0   17.08    3.42 
   1 -14   0    8.59    5.68 
  -1  14   0   15.77    3.16 
   0 -14   0    2.95    2.79 
   0 -14   0    3.54    4.57 
   0 -14   0    7.02    1.88 
   0  14   0    2.42    1.38 
  -1 -14   0   16.39    2.71 
  -1 -14   0    6.94    5.16 
  -1 -14   0   15.68    3.17 
  -1 -14   0   12.89    4.52 
   1  14   0   12.14    3.00 
  -2 -14   0    8.36    1.54 
  -2 -14   0    6.40    3.05 
  -2 -14   0    3.49    4.89 
  -2 -14   0    9.87    2.12 
   2  14   0    6.14    1.93 
  -3 -14   0   19.94    3.64 
  -3 -14   0   10.04    7.15 
  -3 -14   0   17.42    4.64 
  -3 -14   0   14.92    6.29 
  -3 -14   0   25.34    5.67 
  -3 -14   0   22.76    4.09 
  -3 -14   0   29.40    4.84 
   3  14   0   18.36    3.94 
  -4 -14   0    1.77    0.58 
  -4 -14   0   -0.81    2.22 
  -4 -14   0    1.08    1.82 
  -4 -14   0    1.48    1.54 
  -4 -14   0    2.27    1.44 
  -4 -14   0    2.42    3.73 
  -4 -14   0    3.02    2.31 
   4  14   0    4.04    1.18 
  -5 -14   0    0.71    3.30 
  -5 -14   0    4.64    2.96 
  -5 -14   0    0.28    1.29 
  -5 -14   0    3.92    2.13 
  -5 -14   0    5.08    1.44 
  -5 -14   0    3.46    3.92 
  -5 -14   0    3.36    0.71 
  -6 -14   0    7.68    3.25 
  -6 -14   0   10.51    2.51 
  -6 -14   0    9.06    2.26 
  -6 -14   0    9.65    1.80 
  -6 -14   0    9.88    4.06 
  -6 -14   0    9.44    2.91 
  -6 -14   0   18.70    6.28 
  -6 -14   0    5.93    4.08 
  -6 -14   0   10.17    2.29 
  -6 -14   0    8.24    2.47 
  -7 -14   0   17.36    3.19 
  -7 -14   0   12.75    5.15 
  -7 -14   0   18.79    3.09 
  -7 -14   0   12.14    5.36 
  -7 -14   0   12.99    2.68 
  -7 -14   0   16.71    5.09 
  -7 -14   0   13.60    4.70 
  -7 -14   0   16.68    3.16 
  -7 -14   0   16.16    4.18 
  -7 -14   0   12.47    3.18 
  -8 -14   0    7.32    4.83 
  -8 -14   0   14.31    2.96 
  -8 -14   0   13.61    3.02 
  -8 -14   0   17.92    5.09 
  -8 -14   0   16.97    3.12 
  -8 -14   0   11.07    4.00 
  -8 -14   0   13.06    2.45 
  -8 -14   0   12.15    6.08 
  -8 -14   0   12.65    2.87 
  -8 -14   0   10.99    3.63 
  -9 -14   0    0.38    1.10 
  -9 -14   0    1.73    1.86 
  -9 -14   0    0.21    0.46 
  -9 -14   0    1.04    1.22 
  -9 -14   0    3.89    1.20 
  -9 -14   0   -2.58    3.57 
  -9 -14   0    3.36    2.86 
  -9 -14   0    2.67    1.54 
  -9 -14   0   -0.03    4.25 
  -9 -14   0    3.08    2.48 
 -10 -14   0    6.84    3.98 
 -10 -14   0    0.01    1.69 
 -10 -14   0    2.58    2.52 
 -10 -14   0    3.57    1.44 
 -10 -14   0    3.40    1.45 
 -10 -14   0    2.82    1.21 
 -10 -14   0    2.35    2.60 
 -10 -14   0   -0.22    3.79 
 -10 -14   0    2.81    1.59 
 -11 -14   0   -1.62    3.93 
 -11 -14   0   -1.14    1.05 
 -11 -14   0   -1.76    1.44 
 -11 -14   0    3.19    3.74 
 -11 -14   0    0.23    1.13 
 -11 -14   0    1.25    2.94 
 -11 -14   0    0.44    2.38 
 -11 -14   0   -0.26    0.95 
 -11 -14   0   -0.71    2.10 
 -12 -14   0    2.45    2.10 
 -12 -14   0    1.56    1.29 
 -12 -14   0    1.89    1.23 
 -12 -14   0   -0.97    4.94 
 -12 -14   0    1.04    2.44 
 -12 -14   0   -1.66    1.19 
 -13 -14   0    4.35    1.56 
 -13 -14   0    4.18    1.69 
 -13 -14   0    3.81    1.52 
 -13 -14   0    3.80    2.59 
 -13 -14   0    6.72    3.52 
 -14 -14   0    1.60    1.16 
 -14 -14   0    1.53    1.74 
 -14 -14   0    2.33    2.34 
 -14 -14   0    1.50    1.25 
 -15 -14   0    0.46    0.97 
 -15 -14   0    1.58    1.17 
 -15 -14   0    2.03    1.49 
 -15 -14   0   -1.16    2.00 
 -16 -14   0    2.09    1.25 
 -16 -14   0   -0.21    1.23 
 -16 -14   0   -0.52    2.67 
 -16 -14   0    4.33    1.70 
 -17 -14   0    0.10    1.45 
 -17 -14   0    0.23    2.34 
 -17 -14   0   -0.43    1.79 
 -13  15   0   -0.37    0.73 
 -13  15   0    0.61    0.27 
 -12  15   0    1.99    0.93 
 -11  15   0    1.88    1.04 
 -11  15   0    3.38    0.63 
 -10  15   0    2.65    0.58 
  -9  15   0    1.14    0.40 
  -8  15   0    4.99    0.89 
  -8  15   0    2.03    1.90 
  -7  15   0    0.45    1.27 
  -6  15   0   -2.02    1.14 
   5 -15   0    5.13    2.25 
  -5  15   0    6.88    1.89 
   4 -15   0   -1.22    1.67 
   4 -15   0    7.41    3.80 
   3 -15   0    5.21    2.17 
   3 -15   0    6.18    3.90 
  -3  15   0    6.48    1.79 
   2 -15   0   10.24    4.01 
   2 -15   0    4.38    1.92 
  -2  15   0    8.75    2.14 
   1 -15   0   24.48    3.97 
   1 -15   0    5.54    4.18 
  -1  15   0   20.83    3.81 
   0 -15   0   85.36   17.74 
   0 -15   0   94.11   16.79 
   0  15   0   97.75   16.82 
  -1 -15   0   24.67    6.51 
  -1 -15   0   25.99    8.93 
  -1 -15   0   25.34    5.29 
   1  15   0   31.34    5.44 
  -2 -15   0   31.34    8.45 
  -2 -15   0   41.15    7.43 
  -2 -15   0   40.94    7.04 
  -2 -15   0   42.52   10.86 
   2  15   0   38.49    7.39 
  -3 -15   0    4.48    3.56 
  -3 -15   0    6.42    1.37 
  -3 -15   0    9.45    2.03 
  -3 -15   0    7.29    4.77 
   3  15   0    6.98    1.82 
  -4 -15   0    4.60    1.70 
  -4 -15   0    3.85    0.97 
  -4 -15   0    3.98    1.72 
  -4 -15   0    4.94    4.73 
  -4 -15   0    1.78    2.40 
  -4 -15   0    4.85    2.14 
  -4 -15   0    0.55    3.53 
   4  15   0    5.37    1.44 
  -5 -15   0   -1.73    2.86 
  -5 -15   0    0.51    0.42 
  -5 -15   0    0.16    1.89 
  -5 -15   0    1.38    4.76 
  -5 -15   0    0.35    1.16 
  -5 -15   0   -0.06    1.97 
  -5 -15   0    1.28    1.37 
  -5 -15   0    1.70    1.16 
   5  15   0   -0.81    1.11 
  -6 -15   0    9.17    1.98 
  -6 -15   0    3.80    4.02 
  -6 -15   0   10.92    2.41 
  -6 -15   0    6.15    2.59 
  -6 -15   0    6.13    4.41 
  -6 -15   0    5.63    3.03 
  -6 -15   0    9.53    2.22 
  -6 -15   0    6.72    1.44 
  -7 -15   0    0.90    1.23 
  -7 -15   0    0.41    0.49 
  -7 -15   0    1.41    2.82 
  -7 -15   0   -0.40    1.73 
  -7 -15   0    0.25    1.25 
  -7 -15   0    2.17    3.38 
  -7 -15   0   -2.26    3.24 
  -7 -15   0   -0.12    1.52 
  -7 -15   0    0.78    1.17 
  -8 -15   0    7.04    1.85 
  -8 -15   0    1.96    0.63 
  -8 -15   0    0.67    1.54 
  -8 -15   0    3.51    5.45 
  -8 -15   0    2.04    2.29 
  -8 -15   0    3.92    1.46 
  -8 -15   0    0.12    3.16 
  -8 -15   0    0.38    2.55 
  -8 -15   0    0.16    1.07 
  -8 -15   0    6.59    5.06 
  -9 -15   0    6.15    1.52 
  -9 -15   0   -3.23    4.54 
  -9 -15   0    1.94    2.32 
  -9 -15   0    3.25    1.70 
  -9 -15   0   -1.84    2.35 
  -9 -15   0    1.78    1.18 
  -9 -15   0    2.04    0.64 
  -9 -15   0    0.11    3.68 
  -9 -15   0    0.42    2.50 
  -9 -15   0    2.10    1.39 
 -10 -15   0   14.38    5.55 
 -10 -15   0   12.41    6.76 
 -10 -15   0    8.71    5.44 
 -10 -15   0   22.34    3.29 
 -10 -15   0   12.93    3.26 
 -10 -15   0   19.57    5.36 
 -10 -15   0   17.86    3.27 
 -10 -15   0   19.58    4.66 
 -10 -15   0   12.95    2.72 
 -10 -15   0   16.51    3.40 
 -11 -15   0   -1.16    2.81 
 -11 -15   0    0.35    0.96 
 -11 -15   0    2.93    1.48 
 -11 -15   0   -0.06    2.29 
 -11 -15   0   -0.13    1.17 
 -11 -15   0    1.57    1.16 
 -11 -15   0    1.70    5.72 
 -12 -15   0   17.62    3.20 
 -12 -15   0   11.55    4.35 
 -12 -15   0   15.08    3.08 
 -12 -15   0   14.16    3.11 
 -12 -15   0    6.33    3.62 
 -12 -15   0   15.62    3.28 
 -13 -15   0    9.86    2.28 
 -13 -15   0   11.20    2.50 
 -13 -15   0    9.28    2.42 
 -13 -15   0   10.43    2.56 
 -13 -15   0    6.15    3.36 
 -13 -15   0    6.11    3.24 
 -14 -15   0    7.96    2.26 
 -14 -15   0    6.93    2.06 
 -14 -15   0    7.33    3.80 
 -14 -15   0    9.28    2.23 
 -15 -15   0    1.40    2.29 
 -15 -15   0    0.59    1.73 
 -15 -15   0    0.05    1.05 
 -15 -15   0    1.64    1.31 
 -16 -15   0    5.62    1.92 
 -16 -15   0    6.43    1.71 
 -16 -15   0    2.09    1.55 
 -16 -15   0    3.73    2.75 
 -17 -15   0    1.16    1.21 
 -17 -15   0    3.98    1.73 
 -17 -15   0    1.66    1.39 
 -17 -15   0    2.51    3.38 
 -18 -15   0    1.72    1.65 
 -12  16   0    0.20    0.23 
 -11  16   0    2.54    0.54 
 -10  16   0    0.37    0.28 
  -9  16   0    0.96    0.35 
  -8  16   0    0.16    0.31 
  -7  16   0    7.34    1.52 
  -7  16   0    8.11    2.07 
  -7  16   0    5.62    1.15 
  -6  16   0    2.23    1.42 
  -5  16   0    2.46    1.39 
   4 -16   0    1.60    1.51 
   4 -16   0    0.28    3.64 
  -4  16   0   -1.02    1.20 
   3 -16   0   29.78    5.09 
   3 -16   0   13.66    6.14 
   2 -16   0    8.51    2.19 
   2 -16   0    3.55    4.00 
  -2  16   0    6.69    1.97 
   1 -16   0    1.07    1.50 
   1 -16   0   -3.52    2.38 
  -1  16   0   -0.28    1.18 
   0 -16   0   -0.64    2.95 
   0 -16   0    0.92    1.44 
   0  16   0    1.82    1.30 
  -1 -16   0    0.48    2.51 
  -1 -16   0    3.35    1.86 
   1  16   0    3.63    1.48 
  -2 -16   0    1.45    1.38 
  -2 -16   0    0.07    0.54 
  -2 -16   0    1.02    2.61 
   2  16   0    1.92    1.43 
  -3 -16   0   17.98    3.25 
  -3 -16   0   20.11    5.81 
  -3 -16   0   15.39    3.63 
   3  16   0   18.37    3.64 
  -4 -16   0    0.45    0.49 
  -4 -16   0    1.00    2.27 
  -4 -16   0    0.56    1.51 
  -4 -16   0   -0.51    1.34 
   4  16   0    0.50    1.08 
  -5 -16   0   13.40    3.99 
  -5 -16   0    7.27    2.36 
  -5 -16   0    9.36    2.02 
  -5 -16   0    8.47    3.07 
  -5 -16   0    4.41    6.03 
  -5 -16   0    7.43    2.02 
  -5 -16   0    8.56    4.79 
  -5 -16   0    7.94    1.54 
   5  16   0    6.85    2.13 
   5  16   0    2.38    3.86 
  -6 -16   0    0.00    1.21 
  -6 -16   0    0.46    1.14 
  -6 -16   0   -0.92    1.13 
  -6 -16   0    2.38    4.15 
  -6 -16   0   -1.01    1.52 
  -6 -16   0    0.15    0.43 
  -6 -16   0    0.59    2.54 
  -6 -16   0    2.69    5.46 
   6  16   0    2.42    1.12 
  -7 -16   0   -0.23    1.24 
  -7 -16   0    3.34    4.25 
  -7 -16   0    1.10    1.77 
  -7 -16   0   -1.62    4.81 
  -7 -16   0   -0.41    1.49 
  -7 -16   0   -0.94    2.36 
  -7 -16   0    0.12    0.43 
  -7 -16   0    1.96    1.30 
  -8 -16   0    1.82    1.29 
  -8 -16   0    1.75    2.71 
  -8 -16   0    0.97    1.54 
  -8 -16   0    0.37    1.43 
  -8 -16   0   -0.88    1.31 
  -8 -16   0    0.54    0.50 
  -8 -16   0    1.41    3.27 
  -8 -16   0   -0.27    2.15 
  -8 -16   0    4.04    5.34 
  -9 -16   0    1.37    2.08 
  -9 -16   0    2.15    1.34 
  -9 -16   0    3.23    1.50 
  -9 -16   0    4.45    1.61 
  -9 -16   0    5.53    1.73 
  -9 -16   0    4.15    0.89 
  -9 -16   0    4.42    2.80 
 -10 -16   0   -0.07    1.26 
 -10 -16   0    1.02    1.17 
 -10 -16   0    0.95    0.44 
 -10 -16   0    2.03    3.13 
 -10 -16   0   -0.41    2.07 
 -10 -16   0    0.30    1.12 
 -10 -16   0    0.13    1.32 
 -11 -16   0    4.18    1.75 
 -11 -16   0    6.25    3.08 
 -11 -16   0   13.44    2.54 
 -11 -16   0    6.01    1.96 
 -11 -16   0    3.07    2.68 
 -11 -16   0    6.08    2.16 
 -11 -16   0    7.51    1.35 
 -12 -16   0    3.62    2.37 
 -12 -16   0    1.89    1.42 
 -12 -16   0    2.85    2.73 
 -12 -16   0   -0.32    1.35 
 -12 -16   0    1.53    1.67 
 -12 -16   0   -0.57    1.63 
 -13 -16   0    3.56    1.67 
 -13 -16   0    7.22    2.21 
 -13 -16   0    5.51    3.82 
 -13 -16   0    5.16    1.66 
 -13 -16   0    4.07    2.78 
 -13 -16   0    4.24    1.82 
 -14 -16   0   10.09    4.52 
 -14 -16   0   13.44    3.15 
 -14 -16   0   18.53    3.58 
 -14 -16   0   13.97    3.33 
 -15 -16   0    4.02    1.45 
 -15 -16   0    1.88    1.61 
 -15 -16   0    0.93    1.38 
 -15 -16   0    1.83    2.98 
 -16 -16   0   -2.19    2.11 
 -16 -16   0   -0.02    1.29 
 -16 -16   0    3.76    1.45 
 -16 -16   0    0.27    1.47 
 -17 -16   0    0.46    1.82 
 -17 -16   0    0.25    1.63 
 -17 -16   0   -1.38    1.21 
 -17 -16   0   -1.99    2.28 
 -18 -16   0   -1.28    0.97 
 -18 -16   0    1.29    1.36 
 -18 -16   0    1.49    1.17 
 -18 -16   0    1.48    2.48 
 -19 -16   0    2.32    1.42 
 -11  17   0    0.37    0.25 
 -10  17   0    1.23    0.32 
  -9  17   0    1.22    0.34 
  -8  17   0    0.01    0.25 
  -7  17   0    3.19    1.62 
  -7  17   0    5.26    1.26 
  -7  17   0    4.36    0.85 
  -6  17   0   10.71    2.14 
  -6  17   0   10.60    1.87 
  -6  17   0    8.72    2.65 
  -5  17   0   -0.42    1.22 
  -5  17   0    0.57    0.33 
  -5  17   0    1.03    1.00 
   4 -17   0    0.50    1.47 
  -4  17   0    2.93    1.48 
   3 -17   0    3.42    4.14 
   3 -17   0    6.46    2.14 
  -3  17   0    7.24    2.04 
   2 -17   0   15.32    3.87 
   2 -17   0   14.25    5.71 
  -2  17   0   22.20    4.02 
   1 -17   0    3.76    3.62 
   1 -17   0   -1.49    1.49 
  -1  17   0    0.89    1.76 
   0 -17   0    8.17    4.41 
   0 -17   0   15.02    3.35 
   0  17   0   13.70    2.97 
  -1 -17   0    0.93    1.54 
  -1 -17   0    5.12    3.35 
   1  17   0    2.95    1.42 
  -2 -17   0    0.53    1.45 
  -2 -17   0    1.21    2.63 
   2  17   0    0.73    1.19 
  -3 -17   0   11.35    4.73 
  -3 -17   0   18.12    3.09 
  -3 -17   0   15.52    3.55 
   3  17   0   16.54    3.51 
  -4 -17   0    3.91    3.09 
  -4 -17   0    5.99    2.00 
  -4 -17   0    4.06    1.06 
   4  17   0    4.51    1.56 
  -5 -17   0    3.85    3.03 
  -5 -17   0    1.30    1.35 
  -5 -17   0    2.46    1.64 
  -5 -17   0    1.05    0.69 
   5  17   0    0.04    1.19 
  -6 -17   0    1.16    3.53 
  -6 -17   0    2.30    2.32 
  -6 -17   0    6.77    1.26 
  -6 -17   0    6.93    1.81 
  -6 -17   0    5.28    1.82 
  -6 -17   0    4.86    2.12 
   6  17   0    5.19    1.88 
  -7 -17   0    3.38    0.81 
  -7 -17   0    4.03    1.62 
  -7 -17   0   -0.01    3.20 
  -7 -17   0    2.44    1.31 
  -7 -17   0    2.41    2.14 
  -7 -17   0    1.55    1.68 
   7  17   0    5.97    1.51 
  -8 -17   0    0.75    1.60 
  -8 -17   0    3.10    3.56 
  -8 -17   0   -3.01    1.57 
  -8 -17   0    1.13    0.59 
  -8 -17   0    1.85    1.35 
  -8 -17   0    1.03    1.30 
  -9 -17   0   13.56    3.14 
  -9 -17   0   12.83    2.71 
  -9 -17   0   11.05    1.98 
  -9 -17   0    6.65    3.69 
  -9 -17   0   11.24    3.93 
  -9 -17   0    7.99    2.27 
  -9 -17   0    8.63    2.48 
 -10 -17   0    0.19    2.51 
 -10 -17   0    0.73    1.43 
 -10 -17   0    0.17    0.44 
 -10 -17   0    0.89    1.21 
 -10 -17   0    2.65    1.42 
 -10 -17   0    2.25    1.51 
 -10 -17   0    0.23    2.63 
 -11 -17   0    0.76    0.45 
 -11 -17   0   -0.75    1.04 
 -11 -17   0    1.91    2.61 
 -11 -17   0    6.39    2.79 
 -11 -17   0    0.79    1.18 
 -11 -17   0    1.42    1.41 
 -11 -17   0    1.10    1.64 
 -12 -17   0    3.07    0.70 
 -12 -17   0   -0.16    2.90 
 -12 -17   0    3.33    1.62 
 -12 -17   0    2.17    1.36 
 -12 -17   0   -0.05    1.46 
 -12 -17   0   -0.10    1.37 
 -12 -17   0    4.94    2.90 
 -13 -17   0    0.94    2.94 
 -13 -17   0    0.17    1.37 
 -13 -17   0    0.97    1.47 
 -13 -17   0    0.43    1.27 
 -13 -17   0   -1.11    2.05 
 -13 -17   0    0.44    1.21 
 -14 -17   0    0.62    1.65 
 -14 -17   0    4.10    1.67 
 -14 -17   0    7.21    2.03 
 -14 -17   0    1.12    1.45 
 -14 -17   0    5.40    3.01 
 -15 -17   0    0.95    1.30 
 -15 -17   0    6.27    2.12 
 -15 -17   0    1.13    1.39 
 -15 -17   0   -1.79    2.79 
 -16 -17   0    7.20    2.27 
 -16 -17   0    6.47    2.14 
 -16 -17   0   13.76    4.34 
 -16 -17   0    8.63    2.48 
 -17 -17   0    0.30    2.60 
 -17 -17   0    1.57    1.41 
 -17 -17   0    2.69    1.35 
 -17 -17   0   -1.59    1.20 
 -17 -17   0   -0.12    1.52 
 -18 -17   0    1.90    1.50 
 -18 -17   0    3.59    1.25 
 -19 -17   0    0.56    1.33 
 -19 -17   0    1.63    1.01 
 -20 -17   0    0.67    1.08 
  -9  18   0    0.41    0.32 
  -8  18   0    0.90    0.41 
  -7  18   0    0.72    1.37 
  -7  18   0    1.68    0.91 
  -7  18   0    1.63    0.50 
  -6  18   0    1.65    1.48 
  -6  18   0    4.42    1.15 
  -5  18   0    6.69    1.40 
  -5  18   0    2.87    1.67 
   4 -18   0    3.30    1.67 
  -4  18   0    3.10    1.51 
  -4  18   0    2.38    1.10 
   3 -18   0   -3.79    3.80 
   3 -18   0    4.73    1.73 
  -3  18   0    2.76    1.48 
   2 -18   0    1.08    3.86 
   2 -18   0    0.30    1.51 
  -2  18   0    1.50    1.39 
   1 -18   0    9.12    4.75 
   1 -18   0    3.46    1.80 
  -1  18   0    4.96    1.79 
   0 -18   0   15.98    5.72 
   0 -18   0   16.28    4.22 
   0  18   0   27.76    4.45 
  -1 -18   0    5.89    4.05 
  -1 -18   0    9.35    2.27 
   1  18   0    5.82    2.06 
  -2 -18   0    3.59    2.07 
  -2 -18   0    6.35    3.53 
   2  18   0    1.72    1.48 
  -3 -18   0    1.15    3.12 
  -3 -18   0    8.41    2.33 
   3  18   0    5.88    2.03 
  -4 -18   0    0.03    0.54 
  -4 -18   0    0.86    2.83 
  -4 -18   0   -0.66    1.36 
   4  18   0    0.42    1.18 
  -5 -18   0    1.81    2.83 
  -5 -18   0    0.61    1.37 
  -5 -18   0    0.29    0.52 
   5  18   0   -1.48    1.08 
  -6 -18   0   -0.46    0.60 
  -6 -18   0   -0.46    1.21 
  -6 -18   0    0.04    1.41 
  -6 -18   0    0.66    2.67 
  -6 -18   0    3.77    2.18 
  -6 -18   0    0.91    1.53 
   6  18   0    0.98    1.44 
  -7 -18   0    2.67    1.85 
  -7 -18   0    1.08    2.17 
  -7 -18   0    2.80    1.44 
  -7 -18   0    1.17    0.61 
  -7 -18   0   -0.93    1.43 
  -7 -18   0    1.22    3.08 
   7  18   0    3.03    1.60 
  -8 -18   0   -1.69    2.42 
  -8 -18   0   -0.70    1.64 
  -8 -18   0    0.89    1.97 
  -8 -18   0    0.89    0.63 
  -8 -18   0    1.18    1.39 
  -8 -18   0    2.51    1.83 
   8  18   0   -0.61    1.47 
  -9 -18   0    1.04    0.62 
  -9 -18   0   -3.48    2.34 
  -9 -18   0   -0.03    1.32 
  -9 -18   0   -0.09    1.13 
  -9 -18   0    1.19    2.59 
  -9 -18   0   -0.16    1.73 
 -10 -18   0    0.61    1.38 
 -10 -18   0   -1.27    1.37 
 -10 -18   0   -1.72    1.36 
 -10 -18   0    1.00    2.22 
 -10 -18   0    0.81    3.65 
 -10 -18   0    1.16    0.61 
 -11 -18   0    0.31    1.55 
 -11 -18   0    0.89    0.52 
 -11 -18   0   -1.15    1.47 
 -11 -18   0    0.51    1.28 
 -11 -18   0    2.11    3.03 
 -11 -18   0   -0.39    1.46 
 -11 -18   0    1.66    2.54 
 -12 -18   0    6.78    1.26 
 -12 -18   0    8.96    2.41 
 -12 -18   0    5.51    2.35 
 -12 -18   0    4.89    1.77 
 -12 -18   0    9.19    4.42 
 -12 -18   0    0.26    2.58 
 -12 -18   0    3.76    1.86 
 -13 -18   0    7.28    2.39 
 -13 -18   0    4.55    3.16 
 -13 -18   0    6.21    1.77 
 -13 -18   0   -2.18    3.68 
 -13 -18   0    4.18    1.06 
 -13 -18   0    5.11    1.84 
 -13 -18   0    5.26    2.10 
 -14 -18   0    6.10    1.97 
 -14 -18   0    1.25    1.93 
 -14 -18   0    1.21    1.46 
 -14 -18   0    0.20    1.39 
 -14 -18   0    1.67    2.45 
 -15 -18   0   -0.24    1.34 
 -15 -18   0    0.02    3.19 
 -15 -18   0    0.00    1.28 
 -15 -18   0   -1.55    1.48 
 -16 -18   0   -4.28    2.76 
 -16 -18   0   -1.20    1.25 
 -16 -18   0    0.69    1.37 
 -16 -18   0   -0.76    1.81 
 -17 -18   0    4.37    1.93 
 -17 -18   0    4.47    1.34 
 -17 -18   0    5.51    1.44 
 -17 -18   0    3.22    1.61 
 -18 -18   0   -1.25    1.32 
 -18 -18   0    0.88    1.02 
 -19 -18   0    1.11    0.99 
 -19 -18   0    0.01    1.29 
 -20 -18   0    0.24    1.21 
 -20 -18   0   -1.20    0.82 
  -7  19   0    2.98    0.84 
  -6  19   0   -0.94    0.80 
  -6  19   0    0.26    0.94 
  -5  19   0    0.66    0.91 
  -5  19   0    1.80    1.40 
  -4  19   0    7.40    1.93 
  -4  19   0    4.46    1.37 
   3 -19   0    2.04    1.07 
   3 -19   0    0.52    1.58 
  -3  19   0    3.04    1.10 
  -3  19   0    5.62    1.70 
   2 -19   0    0.65    0.98 
   2 -19   0   -2.62    1.30 
  -2  19   0   -0.48    0.88 
  -2  19   0   -0.92    1.23 
   1 -19   0    7.77    2.07 
   1 -19   0   -0.13    3.97 
  -1  19   0    4.58    1.78 
   0 -19   0    5.98    3.91 
   0 -19   0    2.38    1.69 
   0  19   0    2.82    1.56 
  -1 -19   0    1.45    3.20 
  -1 -19   0    1.19    1.62 
   1  19   0    1.66    1.72 
  -2 -19   0    4.06    3.55 
  -2 -19   0    4.77    1.90 
   2  19   0    4.18    1.73 
  -3 -19   0    5.12    2.07 
  -3 -19   0    6.37    4.61 
   3  19   0    7.79    2.34 
  -4 -19   0    2.18    1.64 
  -4 -19   0   -0.39    3.09 
  -4 -19   0    1.88    0.81 
   4  19   0    1.16    1.34 
  -5 -19   0   -1.97    2.55 
  -5 -19   0   -0.30    1.51 
  -5 -19   0    3.81    0.89 
   5  19   0    2.57    1.42 
  -6 -19   0   -0.92    2.84 
  -6 -19   0   -0.05    0.56 
  -6 -19   0   -0.79    1.33 
   6  19   0    0.85    1.26 
  -7 -19   0   -1.34    1.89 
  -7 -19   0   -0.52    0.68 
  -7 -19   0   -0.62    1.44 
  -7 -19   0    2.07    3.12 
  -7 -19   0   -2.18    1.91 
  -7 -19   0    0.16    1.33 
   7  19   0    0.83    1.34 
  -8 -19   0    7.56    1.88 
  -8 -19   0    4.58    1.11 
  -8 -19   0    6.94    1.94 
  -8 -19   0    2.56    2.44 
  -8 -19   0    3.51    3.30 
  -8 -19   0    0.81    2.37 
   8  19   0    2.93    1.64 
  -9 -19   0    6.59    1.33 
  -9 -19   0    7.20    3.06 
  -9 -19   0    5.69    2.38 
  -9 -19   0    5.33    3.63 
  -9 -19   0    5.29    2.01 
  -9 -19   0    7.55    2.04 
   9  19   0    4.03    1.82 
 -10 -19   0    5.57    1.93 
 -10 -19   0    6.43    2.17 
 -10 -19   0    2.92    3.49 
 -10 -19   0    8.46    1.52 
 -10 -19   0   10.31    2.78 
 -10 -19   0    7.24    3.08 
 -11 -19   0    1.74    3.06 
 -11 -19   0    0.23    2.74 
 -11 -19   0   -0.76    1.20 
 -11 -19   0    1.51    0.67 
 -11 -19   0   -0.25    1.33 
 -11 -19   0    1.20    1.85 
 -12 -19   0    0.38    0.50 
 -12 -19   0    1.97    1.88 
 -12 -19   0    4.43    3.38 
 -12 -19   0    0.60    1.28 
 -12 -19   0    1.72    3.04 
 -12 -19   0   -0.05    1.40 
 -13 -19   0   -0.38    2.94 
 -13 -19   0   -1.84    1.54 
 -13 -19   0   -0.59    1.38 
 -13 -19   0    0.95    1.59 
 -13 -19   0   -0.72    1.22 
 -13 -19   0    0.31    0.46 
 -13 -19   0    1.06    2.63 
 -14 -19   0   -0.81    1.57 
 -14 -19   0   -0.23    0.54 
 -14 -19   0    4.03    5.09 
 -14 -19   0   -0.34    1.24 
 -14 -19   0   -0.18    1.51 
 -14 -19   0   -2.48    2.33 
 -14 -19   0    0.12    1.79 
 -15 -19   0    1.74    1.72 
 -15 -19   0    2.09    2.68 
 -15 -19   0    1.99    1.17 
 -15 -19   0    0.30    1.27 
 -15 -19   0    1.48    1.46 
 -15 -19   0    1.64    0.65 
 -15 -19   0    0.70    1.67 
 -16 -19   0    1.10    1.12 
 -16 -19   0    1.37    1.58 
 -16 -19   0    1.66    1.07 
 -16 -19   0    1.73    1.43 
 -17 -19   0   -0.36    0.99 
 -17 -19   0    0.35    1.53 
 -17 -19   0    0.47    1.01 
 -17 -19   0    0.11    1.29 
 -18 -19   0    1.33    1.96 
 -18 -19   0    1.45    1.05 
 -18 -19   0    1.67    1.33 
 -19 -19   0   -0.25    1.22 
 -19 -19   0    1.24    0.70 
 -20 -19   0    1.00    0.95 
 -20 -19   0    2.20    1.37 
 -21 -19   0   -0.19    0.80 
 -21 -19   0   -0.63    1.00 
  -7  20   0    2.35    0.76 
  -6  20   0    0.24    0.79 
  -5  20   0    0.75    0.82 
  -5  20   0    0.29    1.26 
  -4  20   0    1.11    1.30 
  -4  20   0    1.65    0.94 
   3 -20   0    0.30    0.87 
   3 -20   0   -0.50    1.41 
  -3  20   0    1.67    1.35 
  -3  20   0    0.91    0.91 
   2 -20   0   -0.62    0.87 
   2 -20   0   -0.89    1.36 
  -2  20   0   -0.70    1.23 
  -2  20   0   -0.42    0.86 
   1 -20   0    3.62    1.13 
   1 -20   0   -0.89    1.53 
  -1  20   0    2.51    1.50 
  -1  20   0    3.17    1.11 
   0 -20   0   -0.08    1.40 
   0 -20   0   -0.09    0.96 
   0 -20   0    0.72    0.29 
   0  20   0    0.16    1.37 
   0  20   0    0.09    0.90 
  -1 -20   0    2.07    1.40 
  -1 -20   0   -0.04    1.43 
  -1 -20   0   -0.71    3.04 
  -1 -20   0    0.47    0.38 
   1  20   0    0.01    1.39 
  -2 -20   0    3.24    1.74 
  -2 -20   0   -0.67    3.06 
   2  20   0    1.16    1.40 
  -3 -20   0   -0.23    1.44 
  -3 -20   0    2.86    3.43 
   3  20   0   -0.03    1.61 
  -4 -20   0    4.77    1.92 
  -4 -20   0    3.21    3.70 
   4  20   0    2.34    1.61 
  -5 -20   0   -1.34    3.05 
  -5 -20   0    1.94    2.02 
  -5 -20   0    0.75    0.62 
   5  20   0   -1.41    1.30 
  -6 -20   0   -0.57    1.47 
  -6 -20   0   -2.07    2.88 
  -6 -20   0    1.14    0.79 
   6  20   0   -1.51    1.20 
  -7 -20   0   -0.61    1.54 
  -7 -20   0   -2.40    2.81 
  -7 -20   0    1.14    0.76 
   7  20   0   -1.40    1.26 
  -8 -20   0    0.38    0.69 
  -8 -20   0   -3.09    3.48 
  -8 -20   0   -1.81    2.21 
  -8 -20   0   -2.05    1.96 
  -8 -20   0    0.55    1.51 
  -8 -20   0   -0.03    1.36 
   8  20   0   -1.29    1.24 
  -9 -20   0    7.18    3.16 
  -9 -20   0    5.79    1.17 
  -9 -20   0    5.78    1.87 
  -9 -20   0    0.46    1.80 
  -9 -20   0    0.91    3.26 
  -9 -20   0    4.16    1.89 
   9  20   0    5.05    2.09 
 -10 -20   0   -0.06    1.28 
 -10 -20   0   -2.67    3.03 
 -10 -20   0    0.36    0.58 
 -10 -20   0    2.16    1.62 
 -10 -20   0   -0.98    2.48 
 -10 -20   0    0.71    1.72 
  10  20   0    2.19    1.51 
 -11 -20   0   -0.21    1.30 
 -11 -20   0    5.39    4.20 
 -11 -20   0    4.17    1.89 
 -11 -20   0    2.39    1.68 
 -11 -20   0    1.83    0.81 
 -11 -20   0    3.52    2.61 
  11  20   0   -0.37    1.75 
 -12 -20   0    3.18    3.64 
 -12 -20   0    4.64    3.16 
 -12 -20   0    8.21    1.49 
 -12 -20   0    6.83    2.19 
 -12 -20   0    7.15    2.24 
 -12 -20   0    4.96    2.22 
 -13 -20   0    1.21    1.06 
 -13 -20   0   -0.58    1.45 
 -13 -20   0    2.87    1.70 
 -13 -20   0    1.79    1.41 
 -13 -20   0    1.14    0.68 
 -13 -20   0    0.44    3.36 
 -13 -20   0    0.22    2.73 
 -14 -20   0    0.36    1.02 
 -14 -20   0    0.97    1.04 
 -14 -20   0    2.86    1.87 
 -14 -20   0    2.31    1.87 
 -14 -20   0   -0.25    1.31 
 -14 -20   0   -1.93    4.92 
 -14 -20   0    1.02    0.55 
 -14 -20   0    1.10    1.03 
 -15 -20   0    2.03    0.66 
 -15 -20   0    1.85    1.15 
 -15 -20   0    2.38    1.15 
 -15 -20   0    3.22    1.60 
 -16 -20   0    1.61    0.55 
 -16 -20   0   -0.41    0.99 
 -16 -20   0    0.31    1.41 
 -16 -20   0    1.94    1.08 
 -17 -20   0    1.64    1.44 
 -17 -20   0    2.15    1.03 
 -17 -20   0    0.87    1.04 
 -17 -20   0    0.53    1.69 
 -18 -20   0    0.15    0.95 
 -18 -20   0    0.70    1.28 
 -18 -20   0    0.32    0.89 
 -18 -20   0   -0.64    1.54 
 -19 -20   0    0.87    0.96 
 -19 -20   0    1.17    1.20 
 -20 -20   0    0.38    0.85 
 -20 -20   0   -1.16    1.05 
 -21 -20   0    1.70    0.89 
 -22 -20   0    1.37    0.77 
  -6  21   0    1.72    0.82 
  -5  21   0    1.05    0.81 
  -4  21   0   -0.26    1.18 
  -4  21   0    1.32    0.83 
   3 -21   0    1.47    0.85 
  -3  21   0    0.00    0.85 
  -3  21   0    0.67    1.27 
   2 -21   0    0.59    1.36 
   2 -21   0    1.66    0.87 
  -2  21   0   -1.38    1.16 
   1 -21   0    0.12    0.64 
   1 -21   0   -1.38    1.34 
  -1  21   0    0.52    0.83 
  -1  21   0    0.66    1.29 
   0 -21   0   -0.04    1.51 
   0 -21   0    0.71    0.71 
   0  21   0    1.49    1.39 
   0  21   0    0.82    0.67 
  -1 -21   0   -0.10    0.23 
  -1 -21   0   -0.84    1.44 
  -1 -21   0   -1.00    0.92 
   1  21   0    0.47    1.40 
  -2 -21   0   -0.54    0.99 
  -2 -21   0   -0.42    0.31 
  -2 -21   0    0.19    1.48 
   2  21   0   -0.32    1.29 
  -3 -21   0    0.19    1.68 
  -3 -21   0    3.58    1.21 
  -3 -21   0    4.11    0.70 
  -3 -21   0    2.53    1.12 
   3  21   0    3.11    1.66 
  -4 -21   0    2.75    0.95 
  -4 -21   0   -1.88    1.42 
  -4 -21   0   -5.00    4.41 
  -4 -21   0    2.59    1.00 
  -4 -21   0    1.02    0.39 
   4  21   0    1.29    1.52 
  -5 -21   0    0.02    1.51 
  -5 -21   0    1.25    4.08 
   5  21   0    0.55    1.43 
  -6 -21   0   -0.02    0.74 
  -6 -21   0    0.60    1.53 
  -6 -21   0    0.14    3.48 
   6  21   0   -1.19    1.34 
  -7 -21   0    3.94    3.73 
  -7 -21   0    1.02    1.62 
  -7 -21   0    0.42    0.61 
   7  21   0    2.68    1.54 
  -8 -21   0   -0.22    0.59 
  -8 -21   0   -0.59    1.52 
  -8 -21   0    1.69    1.45 
  -8 -21   0   -2.47    3.89 
   8  21   0   -0.43    1.39 
  -9 -21   0   -0.80    1.85 
  -9 -21   0    1.83    3.16 
  -9 -21   0   -1.42    3.46 
  -9 -21   0    3.26    2.03 
  -9 -21   0    0.22    1.22 
  -9 -21   0    1.72    0.80 
   9  21   0    1.90    1.55 
 -10 -21   0   -0.72    1.53 
 -10 -21   0    1.46    2.62 
 -10 -21   0    0.78    1.31 
 -10 -21   0   -0.95    3.26 
 -10 -21   0    1.77    1.71 
 -10 -21   0   -0.03    1.24 
 -10 -21   0    1.44    0.63 
 -10 -21   0    0.10    1.77 
  10  21   0    0.10    1.41 
 -11 -21   0    1.31    1.17 
 -11 -21   0    1.11    1.79 
 -11 -21   0   -0.39    1.88 
 -11 -21   0   -1.62    2.52 
 -11 -21   0   -0.52    1.08 
 -11 -21   0   -0.92    0.69 
 -11 -21   0   -0.32    1.52 
 -11 -21   0    1.87    3.27 
 -11 -21   0   -0.27    1.13 
  11  21   0    0.48    1.44 
 -12 -21   0    3.81    2.19 
 -12 -21   0    1.73    0.75 
 -12 -21   0    0.48    1.02 
 -12 -21   0    1.93    4.41 
 -12 -21   0    1.12    1.39 
 -12 -21   0    1.78    1.05 
 -12 -21   0   -0.02    1.10 
 -12 -21   0    3.07    1.68 
  12  21   0   -1.21    1.32 
 -13 -21   0    0.59    0.56 
 -13 -21   0    0.70    1.45 
 -13 -21   0   -0.47    0.99 
 -13 -21   0    1.59    1.00 
 -13 -21   0    0.75    1.35 
 -13 -21   0    0.64    1.04 
  13  21   0   -1.12    1.32 
 -14 -21   0   -0.15    1.02 
 -14 -21   0    0.40    0.99 
 -14 -21   0    1.21    0.68 
 -14 -21   0   -1.49    0.66 
 -14 -21   0   -0.88    1.64 
 -14 -21   0    0.43    1.48 
  14  21   0   -0.25    1.32 
 -15 -21   0   -0.27    0.50 
 -15 -21   0    0.35    0.99 
 -15 -21   0    0.22    1.34 
 -15 -21   0    0.48    1.00 
 -15 -21   0   -0.01    1.47 
 -16 -21   0    2.69    1.45 
 -16 -21   0    0.57    0.68 
 -16 -21   0    3.10    1.06 
 -16 -21   0    0.97    1.06 
 -17 -21   0    0.18    0.46 
 -17 -21   0    0.83    0.98 
 -17 -21   0   -0.74    0.91 
 -17 -21   0    1.83    1.43 
 -18 -21   0    0.23    0.95 
 -18 -21   0   -0.11    0.89 
 -18 -21   0   -0.26    1.24 
 -18 -21   0    0.21    0.46 
 -19 -21   0    0.38    0.67 
 -19 -21   0    1.62    0.90 
 -19 -21   0    1.40    1.20 
 -20 -21   0   -0.74    0.85 
 -20 -21   0    0.62    1.19 
 -21 -21   0    2.19    0.89 
  -4  22   0    1.28    0.79 
   3 -22   0    0.68    0.88 
  -3  22   0    1.75    0.86 
  -3  22   0    1.85    1.29 
   2 -22   0   -0.15    0.83 
   2 -22   0    1.87    1.08 
  -2  22   0   -0.21    0.78 
  -2  22   0   -0.27    1.21 
   1 -22   0   -0.48    0.84 
   1 -22   0   -0.12    1.43 
  -1  22   0   -1.34    0.78 
  -1  22   0   -0.65    0.84 
   0 -22   0    1.19    0.71 
   0 -22   0    1.94    1.51 
   0  22   0    1.10    1.30 
   0  22   0    1.04    0.67 
  -1 -22   0    0.56    0.20 
  -1 -22   0    0.45    0.97 
  -1 -22   0   -0.98    1.44 
   1  22   0   -1.90    0.84 
   1  22   0   -0.35    1.28 
  -2 -22   0    0.12    1.49 
  -2 -22   0    0.44    0.29 
  -2 -22   0   -0.11    1.00 
   2  22   0   -1.03    1.30 
  -3 -22   0    1.18    0.36 
  -3 -22   0    2.44    1.11 
  -3 -22   0    3.10    1.68 
  -3 -22   0    0.52    0.94 
   3  22   0    1.90    1.52 
  -4 -22   0    1.27    1.61 
  -4 -22   0    1.82    1.03 
  -4 -22   0   -0.41    0.28 
  -4 -22   0   -1.97    0.85 
   4  22   0    1.34    1.52 
  -5 -22   0   -0.26    1.02 
  -5 -22   0    0.67    0.34 
  -5 -22   0    2.16    1.65 
  -5 -22   0   -0.48    0.91 
   5  22   0    2.24    1.55 
  -6 -22   0   -0.09    0.34 
  -6 -22   0    1.16    0.97 
  -6 -22   0   -1.17    1.64 
  -6 -22   0    0.49    1.05 
   6  22   0    0.54    1.44 
  -7 -22   0    0.09    0.99 
  -7 -22   0    2.40    2.05 
  -7 -22   0    1.76    0.67 
  -7 -22   0   -0.99    1.05 
   7  22   0    1.37    1.81 
  -8 -22   0    0.27    1.65 
  -8 -22   0    0.96    0.64 
  -8 -22   0   -0.65    0.98 
  -8 -22   0   -0.34    1.04 
   8  22   0    0.38    1.38 
  -9 -22   0    7.92    1.53 
  -9 -22   0    8.14    1.75 
  -9 -22   0    5.99    1.90 
  -9 -22   0    8.76    2.54 
  -9 -22   0    7.73    1.76 
   9  22   0    3.73    2.03 
 -10 -22   0    0.04    0.60 
 -10 -22   0   -1.56    1.13 
 -10 -22   0   -1.11    0.84 
 -10 -22   0    0.46    1.00 
 -10 -22   0    1.83    1.75 
  10  22   0    0.89    1.45 
 -11 -22   0    0.55    1.29 
 -11 -22   0    0.37    1.07 
 -11 -22   0    1.45    1.05 
 -11 -22   0    1.41    0.66 
 -11 -22   0   -0.13    1.60 
 -11 -22   0    1.06    0.96 
  11  22   0    0.81    1.53 
 -12 -22   0   -1.20    1.22 
 -12 -22   0    0.92    1.02 
 -12 -22   0   -1.04    1.51 
 -12 -22   0    3.30    1.13 
 -12 -22   0    0.65    0.98 
 -12 -22   0    1.77    0.67 
  12  22   0    0.37    1.50 
 -13 -22   0   -0.61    0.55 
 -13 -22   0   -1.19    1.80 
 -13 -22   0    2.84    1.41 
 -13 -22   0    1.03    0.98 
 -13 -22   0    0.59    0.91 
  13  22   0    1.53    1.46 
 -14 -22   0    0.17    1.29 
 -14 -22   0    0.06    0.93 
 -14 -22   0   -0.31    0.54 
 -14 -22   0    0.61    0.97 
  14  22   0    0.29    1.43 
 -15 -22   0   -0.19    0.96 
 -15 -22   0    2.25    1.09 
 -15 -22   0    0.30    1.03 
 -15 -22   0    2.00    0.75 
  15  22   0    0.20    1.37 
 -16 -22   0    4.01    1.15 
 -16 -22   0    0.62    1.40 
 -16 -22   0    4.92    0.89 
 -16 -22   0    1.68    1.15 
  16  22   0    2.43    1.58 
 -17 -22   0    1.07    0.66 
 -17 -22   0    0.85    0.63 
 -17 -22   0   -1.26    1.14 
 -17 -22   0    0.66    0.67 
  17  22   0   -0.82    1.32 
 -18 -22   0   -1.50    1.08 
 -18 -22   0    0.62    0.67 
 -18 -22   0    0.75    0.61 
 -18 -22   0   -0.23    0.56 
  18  22   0   -1.54    1.18 
 -19 -22   0    2.06    0.95 
 -19 -22   0    1.97    0.88 
 -19 -22   0    0.06    1.14 
 -19 -22   0    2.14    0.59 
 -20 -22   0   -1.08    0.78 
   2 -23   0    0.15    0.70 
  -2  23   0    0.01    0.77 
   1 -23   0    1.95    0.85 
   1 -23   0    1.09    1.04 
  -1  23   0    1.37    1.18 
  -1  23   0    0.51    0.61 
   0 -23   0   -0.52    1.37 
   0 -23   0    0.65    0.85 
   0  23   0    0.41    0.81 
   0  23   0    0.82    1.28 
  -1 -23   0    0.20    1.51 
  -1 -23   0    3.28    1.05 
   1  23   0    2.96    1.20 
   1  23   0    2.58    1.01 
  -2 -23   0    1.18    0.95 
  -2 -23   0    0.43    0.23 
  -2 -23   0    0.97    1.53 
   2  23   0   -1.75    1.20 
   2  23   0    2.01    0.89 
  -3 -23   0    0.49    0.26 
  -3 -23   0    1.47    1.02 
  -3 -23   0    0.54    1.11 
   3  23   0    0.64    1.31 
  -4 -23   0   -2.55    1.44 
  -4 -23   0    0.94    0.90 
  -4 -23   0    0.25    0.99 
  -4 -23   0    0.26    0.27 
   4  23   0    0.45    1.34 
  -5 -23   0    0.33    0.71 
  -5 -23   0    0.35    0.90 
  -5 -23   0    2.90    1.63 
   5  23   0    0.05    1.38 
  -6 -23   0   -1.01    0.69 
  -6 -23   0    0.86    1.58 
  -6 -23   0   -0.32    0.91 
   6  23   0    0.27    1.34 
  -7 -23   0    5.02    1.99 
  -7 -23   0    4.17    1.09 
  -7 -23   0    3.48    1.13 
   7  23   0    5.62    1.82 
  -8 -23   0    1.62    0.42 
  -8 -23   0    0.64    0.65 
  -8 -23   0    1.60    1.71 
  -8 -23   0    1.32    1.00 
  -8 -23   0    0.23    1.06 
   8  23   0   -0.12    1.42 
  -9 -23   0   -3.57    1.33 
  -9 -23   0    0.02    0.95 
  -9 -23   0   -0.06    0.59 
   9  23   0   -0.68    1.31 
 -10 -23   0    0.86    1.60 
 -10 -23   0    1.48    0.97 
 -10 -23   0    0.94    0.89 
 -10 -23   0   -0.21    0.59 
 -10 -23   0   -0.78    1.38 
  10  23   0    0.76    1.46 
 -11 -23   0    0.11    0.85 
 -11 -23   0    0.10    1.02 
 -11 -23   0   -0.63    1.12 
 -11 -23   0   -0.59    0.94 
 -11 -23   0   -0.32    0.58 
  11  23   0   -0.50    1.33 
 -12 -23   0    1.15    0.61 
 -12 -23   0    0.14    1.28 
 -12 -23   0   -0.31    0.96 
 -12 -23   0    0.68    0.92 
  12  23   0   -2.13    1.30 
 -13 -23   0    0.78    0.58 
 -13 -23   0   -2.30    0.89 
 -13 -23   0    0.47    0.92 
 -13 -23   0   -0.22    1.22 
 -13 -23   0   -0.39    1.48 
  13  23   0   -0.45    1.37 
 -14 -23   0   -0.47    0.92 
 -14 -23   0   -0.86    1.18 
 -14 -23   0   -0.19    0.89 
 -14 -23   0   -0.77    0.98 
 -14 -23   0    1.25    0.60 
  14  23   0    0.20    1.30 
 -15 -23   0    0.38    0.93 
 -15 -23   0    0.31    0.90 
 -15 -23   0    0.47    0.54 
 -15 -23   0   -0.44    1.27 
  15  23   0   -1.06    1.35 
 -16 -23   0   -0.28    1.26 
 -16 -23   0    2.29    0.62 
 -16 -23   0    0.58    0.91 
 -16 -23   0    1.17    0.69 
  16  23   0   -0.89    1.28 
 -17 -23   0   -0.07    0.88 
 -17 -23   0    1.98    1.29 
 -17 -23   0   -0.49    0.84 
 -17 -23   0    1.12    0.54 
  17  23   0   -0.18    0.91 
 -18 -23   0   -0.56    1.19 
 -18 -23   0    0.07    0.48 
 -18 -23   0    0.92    0.81 
 -18 -23   0    0.48    0.86 
  18  23   0    2.19    1.50 
 -19 -23   0   -0.38    0.80 
 -19 -23   0    0.20    0.75 
   1 -24   0    0.64    0.72 
  -1  24   0    0.62    0.75 
   0 -24   0   -0.16    0.75 
   0  24   0   -0.57    0.75 
  -1 -24   0    0.81    0.83 
  -1 -24   0    0.88    1.38 
   1  24   0    0.27    0.57 
   1  24   0    1.17    1.23 
  -2 -24   0    0.98    0.90 
  -2 -24   0    0.52    1.42 
   2  24   0    3.36    1.10 
   2  24   0    0.81    0.88 
  -3 -24   0    2.86    1.01 
  -3 -24   0    0.99    1.13 
   3  24   0    1.62    1.35 
   3  24   0    1.66    0.90 
  -4 -24   0    2.17    0.47 
  -4 -24   0    2.87    0.82 
  -4 -24   0    3.23    1.69 
   4  24   0    1.04    1.41 
  -5 -24   0    1.09    1.18 
  -5 -24   0   -0.77    0.90 
  -5 -24   0    0.73    0.28 
   5  24   0    0.09    1.32 
  -6 -24   0    1.10    0.33 
  -6 -24   0   -0.52    0.85 
  -6 -24   0    1.07    1.59 
  -6 -24   0    2.01    1.00 
   6  24   0    0.74    1.42 
  -7 -24   0    2.17    1.69 
  -7 -24   0    2.27    1.08 
  -7 -24   0    0.93    1.00 
  -7 -24   0    2.56    0.50 
   7  24   0    1.49    1.60 
  -8 -24   0    0.17    0.99 
  -8 -24   0   -0.26    0.89 
  -8 -24   0   -1.65    0.93 
   8  24   0    0.43    1.46 
  -9 -24   0   -0.67    0.57 
  -9 -24   0    0.83    1.59 
  -9 -24   0    1.02    0.67 
   9  24   0   -0.64    1.30 
 -10 -24   0   -0.73    0.87 
 -10 -24   0    0.28    1.56 
 -10 -24   0   -0.01    0.58 
  10  24   0   -1.14    0.88 
 -11 -24   0   -0.17    1.51 
 -11 -24   0    1.57    1.17 
 -11 -24   0   -0.53    0.56 
 -11 -24   0   -0.09    0.77 
 -11 -24   0   -0.14    0.89 
  11  24   0   -0.68    1.29 
 -12 -24   0    0.67    0.88 
 -12 -24   0    0.81    0.59 
 -12 -24   0   -0.47    0.74 
 -12 -24   0    1.31    0.87 
 -12 -24   0    0.25    1.47 
  12  24   0   -0.69    1.32 
 -13 -24   0    0.74    0.89 
 -13 -24   0    0.71    0.57 
 -13 -24   0    0.95    1.21 
 -13 -24   0    0.41    0.84 
  13  24   0   -0.48    1.32 
 -14 -24   0    1.75    1.23 
 -14 -24   0    1.90    0.61 
 -14 -24   0   -0.54    0.81 
 -14 -24   0   -1.34    1.38 
 -14 -24   0   -1.83    0.84 
  14  24   0   -0.81    1.35 
 -15 -24   0    0.26    0.86 
 -15 -24   0   -1.18    0.79 
 -15 -24   0   -0.57    0.48 
 -15 -24   0    0.00    1.16 
  15  24   0   -0.04    0.90 
 -16 -24   0    1.01    0.54 
 -16 -24   0   -0.34    0.85 
 -16 -24   0    0.54    0.83 
 -16 -24   0    0.22    0.86 
  16  24   0    0.37    1.28 
 -17 -24   0    1.13    1.24 
 -17 -24   0    0.41    0.60 
 -17 -24   0    0.96    0.87 
 -17 -24   0    0.28    0.50 
 -18 -24   0    0.25    0.57 
 -18 -24   0    0.40    0.54 
  -2 -25   0    0.86    0.60 
   2  25   0    0.94    0.58 
  -3 -25   0   -1.98    0.85 
  -3 -25   0   -0.56    0.55 
   3  25   0   -0.50    0.85 
   3  25   0   -0.95    0.76 
  -4 -25   0    0.26    0.25 
  -4 -25   0    1.69    1.42 
  -4 -25   0    0.53    0.62 
   4  25   0   -0.84    1.18 
   4  25   0    0.91    0.81 
  -5 -25   0    0.79    0.89 
  -5 -25   0    0.98    1.08 
  -5 -25   0    0.38    0.23 
   5  25   0   -0.53    1.17 
  -6 -25   0   -0.14    1.37 
  -6 -25   0    0.27    0.88 
   6  25   0    0.28    1.29 
  -7 -25   0    0.22    0.84 
  -7 -25   0   -0.02    0.19 
  -7 -25   0    0.17    0.91 
  -7 -25   0    0.30    1.45 
   7  25   0   -0.57    0.93 
  -8 -25   0   -0.12    1.52 
  -8 -25   0    1.13    0.95 
  -8 -25   0    0.28    0.28 
  -8 -25   0    0.81    0.64 
   8  25   0   -0.85    1.26 
  -9 -25   0    0.80    0.37 
  -9 -25   0    1.95    0.92 
  -9 -25   0    2.27    1.02 
  -9 -25   0    0.69    1.56 
   9  25   0    0.47    1.38 
 -10 -25   0    5.40    1.94 
 -10 -25   0    5.25    1.16 
 -10 -25   0    5.25    1.19 
 -10 -25   0    5.32    0.97 
  10  25   0    2.99    1.76 
 -11 -25   0   -0.47    0.56 
 -11 -25   0   -0.37    0.64 
 -11 -25   0    0.92    0.88 
 -11 -25   0   -0.15    0.34 
 -11 -25   0   -1.22    1.42 
  11  25   0    1.10    1.34 
 -12 -25   0    0.17    0.77 
 -12 -25   0    0.10    0.86 
 -12 -25   0    1.00    0.60 
 -12 -25   0    1.06    1.10 
 -12 -25   0    0.95    1.54 
  12  25   0    0.80    1.02 
 -13 -25   0    0.25    0.77 
 -13 -25   0    1.91    0.83 
 -13 -25   0   -0.54    0.83 
 -13 -25   0    2.02    0.64 
  13  25   0   -0.01    0.89 
 -14 -25   0   -0.43    0.52 
 -14 -25   0   -0.96    0.52 
 -14 -25   0    1.47    0.83 
 -14 -25   0    0.15    1.13 
  14  25   0    0.43    1.31 
 -15 -25   0   -0.45    0.76 
 -15 -25   0   -0.40    0.76 
 -15 -25   0    0.62    0.53 
  15  25   0   -1.37    1.42 
 -16 -25   0    1.38    0.63 
 -16 -25   0    1.80    0.89 
  -5 -26   0    0.98    0.65 
   5  26   0    1.73    0.64 
  -6 -26   0    0.63    0.86 
   6  26   0    0.28    0.58 
  -7 -26   0    1.54    0.34 
  -7 -26   0    0.69    0.69 
  -7 -26   0    1.39    1.16 
  -8 -26   0   -0.27    0.24 
  -8 -26   0   -0.56    0.61 
  -8 -26   0    0.03    1.06 
  -8 -26   0   -0.13    0.79 
   8  26   0    1.69    1.02 
  -9 -26   0    0.52    0.67 
  -9 -26   0    0.30    0.20 
  -9 -26   0    0.74    0.59 
 -10 -26   0    0.52    0.21 
 -10 -26   0    1.76    0.94 
 -10 -26   0    0.80    2.06 
 -10 -26   0   -1.00    0.77 
  10  26   0    0.92    1.07 
 -11 -26   0    1.24    1.17 
 -11 -26   0    0.18    0.29 
 -11 -26   0    0.60    0.79 
 -12 -26   0    0.92    0.25 
 -12 -26   0    0.16    0.49 
 -12 -26   0    0.65    0.78 
 -13 -26   0    0.05    0.68 
 -13 -26   0   -0.77    0.73 
 -14 -26   0    0.93    0.56 
 -14 -26   0    1.08    0.79 
 -12 -26   1    1.15    0.31 
 -12 -26   1   -0.15    0.54 
 -12 -26   1    1.15    0.69 
 -11 -26   1    0.02    0.82 
 -11 -26   1    0.65    0.55 
 -11 -26   1    0.42    0.29 
 -10 -26   1   -0.16    0.26 
 -10 -26   1    0.66    0.63 
 -10 -26   1    0.46    0.56 
  -9 -26   1    0.29    0.18 
  -9 -26   1   -0.30    0.88 
  -9 -26   1   -0.04    0.77 
  -8 -26   1    0.45    0.62 
  -8 -26   1    0.41    0.26 
  -8 -26   1    0.41    0.54 
  -7 -26   1    1.73    0.77 
  -7 -26   1    2.29    0.45 
  -6 -26   1    0.61    0.85 
  -6 -26   1    0.00    0.20 
 -15 -25   1    2.03    0.61 
 -15 -25   1   -0.31    0.53 
 -14 -25   1   -0.01    0.79 
 -14 -25   1    0.00    0.69 
 -14 -25   1   -0.21    0.51 
  13  25  -1    1.11    1.37 
 -13 -25   1    1.38    0.82 
 -13 -25   1    0.34    0.53 
 -13 -25   1    0.01    1.04 
 -13 -25   1    0.09    0.85 
 -13 -25   1   -0.14    0.53 
  12  25  -1    0.35    1.36 
 -12 -25   1   -1.42    0.79 
 -12 -25   1   -1.82    1.03 
 -12 -25   1   -1.25    0.86 
 -12 -25   1   -0.54    0.74 
 -12 -25   1    0.19    0.55 
  11  25  -1    0.41    1.37 
 -11 -25   1    0.54    0.33 
 -11 -25   1   -0.04    0.56 
 -11 -25   1   -0.50    1.26 
 -11 -25   1    0.96    0.85 
 -11 -25   1    1.43    0.75 
  10  25  -1    3.56    1.68 
 -10 -25   1    3.56    0.97 
 -10 -25   1    1.75    1.08 
 -10 -25   1    2.17    1.68 
 -10 -25   1    4.60    0.73 
   9  25  -1   -0.63    1.24 
  -9 -25   1   -0.81    0.94 
  -9 -25   1   -0.56    0.30 
  -9 -25   1    0.80    1.04 
  -9 -25   1    1.04    0.60 
   8  25  -1   -0.95    1.33 
  -8 -25   1    0.18    0.28 
  -8 -25   1   -0.01    0.93 
  -8 -25   1   -0.66    1.37 
  -8 -25   1    0.30    0.83 
   7  25  -1    0.11    1.31 
  -7 -25   1    1.16    0.32 
  -7 -25   1    0.96    0.92 
  -7 -25   1    0.47    1.47 
  -7 -25   1    0.78    0.63 
   6  25  -1    0.20    0.88 
  -6 -25   1    0.00    0.25 
  -6 -25   1    0.20    1.44 
  -6 -25   1    0.59    0.89 
  -6 -25   1    0.45    0.57 
   5  25  -1   -0.60    0.84 
  -5 -25   1   -0.06    0.85 
  -5 -25   1    2.53    1.55 
  -5 -25   1    0.00    0.21 
   4  25  -1   -0.33    1.53 
   4  25  -1   -0.25    0.53 
  -4 -25   1    0.63    0.62 
  -4 -25   1   -0.43    0.19 
   3  25  -1    0.03    0.55 
  -3 -25   1    0.18    0.82 
   2  25  -1    0.45    0.73 
  -2 -25   1    0.77    0.79 
 -17 -24   1    1.41    0.65 
 -17 -24   1    2.16    0.72 
 -16 -24   1   -0.12    0.78 
 -16 -24   1   -0.79    0.53 
 -16 -24   1    0.56    0.50 
 -16 -24   1   -2.02    1.33 
  15  24  -1   -0.18    1.28 
 -15 -24   1   -0.74    0.75 
 -15 -24   1   -0.65    0.49 
 -15 -24   1    0.54    0.83 
 -15 -24   1   -0.05    0.57 
  14  24  -1   -0.63    1.30 
 -14 -24   1   -0.54    0.78 
 -14 -24   1    0.46    0.62 
 -14 -24   1    0.15    0.52 
 -14 -24   1   -1.51    1.08 
  13  24  -1    0.29    0.96 
 -13 -24   1   -0.63    0.82 
 -13 -24   1    0.43    0.57 
 -13 -24   1    0.73    0.90 
 -13 -24   1   -0.91    1.11 
 -13 -24   1    2.09    1.47 
  12  24  -1    0.90    0.99 
 -12 -24   1   -0.14    0.51 
 -12 -24   1   -1.57    0.83 
 -12 -24   1   -0.17    1.07 
 -12 -24   1   -0.03    0.59 
 -12 -24   1    0.05    0.87 
  11  24  -1   -0.10    0.97 
 -11 -24   1   -0.52    0.88 
 -11 -24   1    0.26    0.97 
 -11 -24   1    0.62    0.59 
 -11 -24   1    0.62    0.83 
 -11 -24   1    0.77    1.18 
  10  24  -1    0.67    1.32 
 -10 -24   1   -1.11    1.35 
 -10 -24   1   -0.29    0.62 
 -10 -24   1    0.44    0.59 
   9  24  -1    1.40    1.48 
  -9 -24   1    0.54    0.63 
  -9 -24   1    2.19    1.56 
  -9 -24   1    0.95    0.99 
  -9 -24   1    0.68    0.90 
  -9 -24   1    0.42    0.36 
   8  24  -1    0.34    1.38 
  -8 -24   1   -0.08    0.60 
  -8 -24   1    1.73    1.54 
  -8 -24   1   -0.59    0.96 
  -8 -24   1    0.91    0.33 
   7  24  -1    2.27    1.54 
  -7 -24   1    0.10    0.89 
  -7 -24   1    2.49    1.64 
  -7 -24   1    1.05    0.36 
  -7 -24   1    0.73    0.99 
   6  24  -1    1.08    1.48 
  -6 -24   1    0.75    0.95 
  -6 -24   1    3.77    1.74 
  -6 -24   1    2.09    1.06 
  -6 -24   1    2.80    0.50 
   5  24  -1   -0.51    1.32 
  -5 -24   1    0.73    0.92 
  -5 -24   1   -0.32    0.25 
  -5 -24   1   -0.82    0.82 
  -5 -24   1    1.37    1.51 
   4  24  -1    2.80    1.43 
  -4 -24   1    0.92    0.70 
  -4 -24   1    0.59    1.46 
   3  24  -1    1.85    1.37 
   3  24  -1    1.32    0.87 
  -3 -24   1    1.19    1.41 
  -3 -24   1   -0.82    0.88 
   2  24  -1    1.70    0.92 
   2  24  -1    1.19    1.00 
  -2 -24   1    2.96    1.52 
  -2 -24   1    2.07    0.75 
   1  24  -1    0.12    0.56 
   1  24  -1    0.83    1.27 
  -1 -24   1   -0.16    0.56 
   0  24  -1    0.29    0.76 
   0 -24   1   -0.64    0.53 
 -18 -23   1    0.80    0.65 
 -18 -23   1    0.25    0.78 
  17  23  -1    0.36    1.30 
 -17 -23   1    0.03    0.50 
 -17 -23   1    1.63    0.85 
 -17 -23   1   -0.25    0.62 
 -17 -23   1    0.09    1.22 
  16  23  -1   -1.30    1.27 
 -16 -23   1    0.19    0.87 
 -16 -23   1    0.05    0.86 
 -16 -23   1   -0.20    1.14 
 -16 -23   1    0.11    0.49 
  15  23  -1    1.08    1.41 
 -15 -23   1    0.16    0.93 
 -15 -23   1    0.18    0.57 
 -15 -23   1   -0.34    0.88 
 -15 -23   1    1.58    0.70 
  14  23  -1    3.25    1.53 
 -14 -23   1    0.29    0.88 
 -14 -23   1    0.40    1.42 
 -14 -23   1   -0.90    1.21 
 -14 -23   1   -0.58    0.86 
 -14 -23   1   -0.21    0.54 
  13  23  -1    0.43    1.47 
 -13 -23   1    0.01    1.23 
 -13 -23   1    0.66    1.43 
 -13 -23   1    0.14    0.96 
 -13 -23   1   -0.38    0.89 
 -13 -23   1    0.37    0.90 
 -13 -23   1    0.75    0.60 
  12  23  -1   -1.83    1.32 
 -12 -23   1    1.50    0.64 
 -12 -23   1    0.92    0.72 
 -12 -23   1   -0.14    1.22 
 -12 -23   1    0.85    1.57 
 -12 -23   1    2.09    0.96 
  11  23  -1    0.65    1.44 
 -11 -23   1    2.02    1.62 
 -11 -23   1    0.45    1.15 
 -11 -23   1    0.51    0.63 
 -11 -23   1    1.93    0.99 
 -11 -23   1    1.03    0.69 
  10  23  -1    1.52    1.54 
 -10 -23   1    0.14    0.75 
 -10 -23   1    1.99    0.92 
 -10 -23   1   -0.65    1.10 
 -10 -23   1    2.13    1.61 
 -10 -23   1    1.72    1.03 
   9  23  -1    1.94    1.55 
  -9 -23   1    3.16    1.77 
  -9 -23   1    1.68    0.79 
  -9 -23   1    4.07    1.15 
   8  23  -1   -0.73    1.46 
  -8 -23   1    1.03    0.78 
  -8 -23   1    1.52    0.41 
  -8 -23   1    0.52    0.97 
  -8 -23   1    0.80    1.04 
  -8 -23   1   -0.47    1.52 
   7  23  -1    1.73    1.50 
  -7 -23   1    1.52    0.43 
  -7 -23   1    1.90    0.99 
  -7 -23   1    1.14    1.61 
  -7 -23   1    0.30    0.78 
   6  23  -1   -0.93    1.34 
  -6 -23   1    0.88    1.03 
  -6 -23   1    0.07    0.64 
  -6 -23   1   -2.46    1.37 
   5  23  -1   -1.62    1.29 
  -5 -23   1    0.26    0.98 
  -5 -23   1   -0.20    0.28 
  -5 -23   1   -1.36    0.85 
  -5 -23   1    0.11    1.50 
   4  23  -1    0.25    1.32 
  -4 -23   1    0.52    0.70 
  -4 -23   1    0.40    0.28 
  -4 -23   1    1.26    1.49 
  -4 -23   1    0.08    0.62 
   3  23  -1    1.96    1.36 
  -3 -23   1    0.96    1.01 
  -3 -23   1    1.55    0.35 
  -3 -23   1   -1.58    1.47 
   2  23  -1   -0.04    1.31 
   2  23  -1    0.91    0.87 
  -2 -23   1    0.32    0.21 
  -2 -23   1   -0.17    0.65 
  -2 -23   1    0.80    1.42 
   1  23  -1    1.76    0.92 
   1  23  -1    1.16    1.02 
  -1 -23   1    0.98    0.96 
  -1 -23   1    0.67    1.11 
   0  23  -1    0.90    0.80 
   0  23  -1    0.70    1.25 
   0 -23   1    0.00    1.04 
   0 -23   1    0.21    0.86 
  -1  23  -1    0.60    1.17 
  -1  23  -1    1.21    0.62 
   1 -23   1   -0.57    1.42 
   1 -23   1   -0.08    0.57 
  -2  23  -1    0.22    0.52 
   2 -23   1   -0.97    0.73 
 -19 -22   1    0.85    0.56 
 -19 -22   1   -0.28    0.56 
 -19 -22   1    2.06    1.21 
  18  22  -1    1.14    1.25 
 -18 -22   1   -0.67    0.45 
 -18 -22   1    0.19    0.80 
 -18 -22   1   -1.15    1.14 
 -18 -22   1    1.19    0.92 
  17  22  -1    1.63    1.05 
 -17 -22   1   -1.09    0.84 
 -17 -22   1   -0.49    1.25 
 -17 -22   1   -0.47    0.91 
 -17 -22   1    0.49    0.46 
  16  22  -1    1.41    1.44 
 -16 -22   1    2.11    1.07 
 -16 -22   1    3.75    0.79 
 -16 -22   1    2.24    1.10 
 -16 -22   1    2.19    1.17 
  15  22  -1   -0.79    1.34 
 -15 -22   1   -0.13    0.92 
 -15 -22   1   -0.48    0.93 
 -15 -22   1   -0.60    0.51 
 -15 -22   1   -0.32    1.24 
  14  22  -1    0.42    1.48 
 -14 -22   1   -0.18    1.53 
 -14 -22   1    1.98    1.08 
 -14 -22   1    2.06    1.08 
 -14 -22   1    2.95    0.74 
 -14 -22   1    1.68    1.43 
  13  22  -1    3.51    1.66 
 -13 -22   1    2.72    1.07 
 -13 -22   1    0.58    1.00 
 -13 -22   1    0.54    1.30 
 -13 -22   1    2.18    0.70 
  12  22  -1   -1.40    1.35 
 -12 -22   1    0.17    1.01 
 -12 -22   1    0.61    0.72 
 -12 -22   1   -0.58    1.45 
 -12 -22   1   -1.38    0.87 
 -12 -22   1    0.34    1.30 
 -12 -22   1    0.16    0.98 
  11  22  -1   -2.00    1.28 
 -11 -22   1   -0.04    1.48 
 -11 -22   1   -0.88    1.45 
 -11 -22   1   -0.91    0.88 
 -11 -22   1   -0.49    0.58 
 -11 -22   1   -1.94    1.00 
 -11 -22   1    0.82    1.02 
  10  22  -1    4.62    1.87 
 -10 -22   1    7.68    1.28 
 -10 -22   1    5.50    1.41 
 -10 -22   1    4.83    2.04 
 -10 -22   1    2.59    1.56 
 -10 -22   1    4.85    1.34 
 -10 -22   1    3.59    1.18 
   9  22  -1   -0.11    1.43 
  -9 -22   1    1.64    1.25 
  -9 -22   1   -0.60    0.59 
  -9 -22   1    0.22    1.53 
  -9 -22   1   -1.35    1.00 
   8  22  -1   -2.30    1.32 
  -8 -22   1    2.70    0.83 
  -8 -22   1    2.45    1.09 
  -8 -22   1   -0.05    0.71 
  -8 -22   1    1.50    1.66 
   7  22  -1    1.73    1.56 
  -7 -22   1   -0.74    0.95 
  -7 -22   1    0.99    1.09 
  -7 -22   1    0.64    0.64 
  -7 -22   1    0.87    1.64 
   6  22  -1    1.49    1.62 
  -6 -22   1    0.98    0.97 
  -6 -22   1    0.50    1.64 
  -6 -22   1    0.59    1.05 
  -6 -22   1    0.71    0.37 
   5  22  -1    0.63    1.50 
  -5 -22   1    1.27    0.42 
  -5 -22   1    0.67    0.93 
  -5 -22   1   -0.85    1.01 
  -5 -22   1    0.37    1.61 
   4  22  -1   -1.61    1.32 
  -4 -22   1   -1.48    0.86 
  -4 -22   1   -0.09    1.00 
  -4 -22   1    1.44    1.61 
   3  22  -1    3.04    1.64 
  -3 -22   1    1.85    1.60 
  -3 -22   1    3.59    0.64 
  -3 -22   1    2.49    1.21 
  -3 -22   1    2.69    1.13 
   2  22  -1   -0.17    1.35 
  -2 -22   1   -0.01    0.68 
  -2 -22   1   -1.47    1.43 
  -2 -22   1   -0.66    0.28 
   1  22  -1    0.82    1.36 
   1  22  -1    0.10    0.91 
  -1 -22   1    0.32    0.99 
  -1 -22   1    1.90    0.36 
  -1 -22   1    1.58    1.60 
   0  22  -1    0.75    1.31 
   0  22  -1   -0.84    0.56 
   0 -22   1    0.58    0.91 
   0 -22   1    1.92    1.56 
  -1  22  -1   -0.44    0.83 
  -1  22  -1    0.17    0.87 
   1 -22   1   -0.84    0.84 
   1 -22   1   -0.59    1.37 
  -2  22  -1   -0.54    0.81 
  -2  22  -1   -1.53    1.09 
   2 -22   1   -1.36    0.83 
   2 -22   1   -0.27    0.96 
  -3  22  -1    0.78    1.21 
  -3  22  -1    0.01    0.80 
   3 -22   1    1.52    0.81 
   3 -22   1    0.86    1.46 
  -4  22  -1    1.16    0.76 
   4 -22   1    1.33    0.75 
 -20 -21   1    0.84    0.81 
 -19 -21   1    0.12    0.85 
 -19 -21   1   -0.55    1.22 
 -19 -21   1   -0.11    0.80 
 -18 -21   1    1.08    0.95 
 -18 -21   1    0.88    1.26 
 -18 -21   1    1.32    0.98 
 -18 -21   1    1.87    0.58 
 -17 -21   1   -1.09    0.90 
 -17 -21   1    0.64    0.49 
 -17 -21   1    0.32    1.28 
 -17 -21   1   -0.16    0.68 
 -16 -21   1    2.11    1.38 
 -16 -21   1    0.45    0.62 
 -16 -21   1   -0.59    0.94 
 -16 -21   1    1.02    0.97 
 -15 -21   1    3.56    1.50 
 -15 -21   1    0.55    1.11 
 -15 -21   1    3.79    1.17 
 -15 -21   1    2.61    0.76 
 -14 -21   1   -1.03    0.97 
 -14 -21   1    0.08    0.56 
 -14 -21   1    0.50    0.97 
 -14 -21   1    1.84    1.39 
  13  21  -1   -0.28    1.34 
 -13 -21   1    0.37    1.00 
 -13 -21   1   -0.29    1.47 
 -13 -21   1    0.60    0.71 
 -13 -21   1   -1.21    1.32 
 -13 -21   1    0.90    1.00 
  12  21  -1   -0.72    1.34 
 -12 -21   1    0.81    1.00 
 -12 -21   1    1.30    0.64 
 -12 -21   1    1.12    1.05 
 -12 -21   1    0.72    1.55 
 -12 -21   1   -0.19    1.32 
 -12 -21   1    2.41    1.09 
  11  21  -1    2.55    1.54 
 -11 -21   1    0.79    0.59 
 -11 -21   1   -1.13    1.22 
 -11 -21   1    1.67    1.53 
 -11 -21   1   -0.13    1.06 
 -11 -21   1    0.89    1.05 
 -11 -21   1    0.28    1.00 
  10  21  -1    0.63    1.54 
 -10 -21   1    3.31    3.94 
 -10 -21   1   -0.21    1.43 
 -10 -21   1    2.09    0.80 
 -10 -21   1    1.46    1.08 
 -10 -21   1    0.38    0.97 
 -10 -21   1   -0.63    1.04 
 -10 -21   1    0.72    1.83 
 -10 -21   1    0.33    1.21 
   9  21  -1   -0.32    1.41 
  -9 -21   1    0.08    1.49 
  -9 -21   1    0.82    4.25 
  -9 -21   1    0.60    1.57 
  -9 -21   1    1.66    1.09 
  -9 -21   1    2.04    0.71 
  -9 -21   1    1.35    1.12 
  -9 -21   1    0.69    1.13 
  -9 -21   1    1.45    2.03 
  -9 -21   1    0.71    2.71 
   8  21  -1    2.23    2.04 
  -8 -21   1    5.76    1.97 
  -8 -21   1    2.41    1.48 
  -8 -21   1    9.04    5.01 
  -8 -21   1    1.94    1.34 
  -8 -21   1    7.13    1.19 
  -8 -21   1    3.47    1.67 
   7  21  -1    3.62    1.98 
  -7 -21   1    7.14    1.67 
  -7 -21   1    5.02    1.54 
  -7 -21   1    5.44    2.09 
  -7 -21   1    2.06    3.59 
  -7 -21   1    6.61    1.35 
   6  21  -1    0.73    1.49 
  -6 -21   1    2.56    4.18 
  -6 -21   1   -1.21    1.52 
  -6 -21   1    2.09    0.86 
  -6 -21   1   -1.28    0.45 
  -6 -21   1    0.38    0.74 
  -6 -21   1   -0.17    0.95 
   5  21  -1    2.70    1.61 
  -5 -21   1    2.04    3.61 
  -5 -21   1    1.76    2.07 
  -5 -21   1    4.06    1.13 
  -5 -21   1    2.15    0.58 
  -5 -21   1    2.70    1.22 
   4  21  -1    1.17    1.50 
  -4 -21   1   -1.81    0.88 
  -4 -21   1    0.70    1.62 
  -4 -21   1   -0.09    0.33 
  -4 -21   1   -0.53    1.05 
   3  21  -1    0.47    1.74 
  -3 -21   1    0.57    0.95 
  -3 -21   1    1.08    0.40 
  -3 -21   1    2.74    1.69 
  -3 -21   1    0.29    1.03 
   2  21  -1    0.64    1.34 
  -2 -21   1   -0.43    0.63 
  -2 -21   1   -0.30    0.32 
  -2 -21   1    0.90    0.97 
  -2 -21   1    0.70    1.53 
   1  21  -1   -2.77    1.25 
  -1 -21   1   -1.59    1.42 
  -1 -21   1    1.37    1.00 
  -1 -21   1   -0.59    0.22 
   0  21  -1   -0.12    0.89 
   0  21  -1    0.17    1.28 
   0 -21   1    0.41    1.46 
   0 -21   1   -0.13    0.94 
   0 -21   1    0.07    0.24 
  -1  21  -1    1.93    1.52 
   1 -21   1    2.56    1.61 
   1 -21   1    2.70    1.07 
  -2  21  -1   -1.63    1.21 
  -2  21  -1   -1.00    0.82 
   2 -21   1    1.83    1.48 
   2 -21   1   -0.04    0.86 
  -3  21  -1   -0.51    1.17 
  -3  21  -1   -0.78    0.81 
   3 -21   1   -0.26    1.31 
   3 -21   1   -0.96    0.81 
  -4  21  -1   -0.17    0.79 
  -4  21  -1    1.32    1.27 
   4 -21   1   -0.85    0.75 
  -5  21  -1   -0.10    0.76 
  -6  21  -1    1.34    0.61 
 -21 -20   1   -0.36    0.72 
 -20 -20   1   -0.03    1.14 
 -20 -20   1    0.24    0.82 
 -19 -20   1    0.20    0.84 
 -19 -20   1   -0.12    1.16 
 -19 -20   1    1.09    0.91 
 -18 -20   1   -1.09    1.46 
 -18 -20   1    0.63    0.91 
 -18 -20   1    2.10    1.30 
 -18 -20   1    0.84    0.71 
 -17 -20   1    2.34    1.12 
 -17 -20   1    1.76    0.71 
 -17 -20   1    0.38    1.00 
 -17 -20   1    2.77    1.07 
 -17 -20   1    3.78    1.81 
 -16 -20   1   -0.85    1.57 
 -16 -20   1   -0.62    1.01 
 -16 -20   1    0.77    1.39 
 -16 -20   1    1.01    0.50 
 -16 -20   1   -1.05    0.98 
 -15 -20   1    2.36    1.46 
 -15 -20   1    1.65    1.70 
 -15 -20   1   -0.02    0.61 
 -15 -20   1   -0.15    1.04 
 -15 -20   1    0.60    1.03 
 -14 -20   1    0.97    1.02 
 -14 -20   1   -0.47    0.46 
 -14 -20   1   -1.80    0.97 
 -14 -20   1    0.24    1.28 
 -13 -20   1   -0.70    3.01 
 -13 -20   1    0.78    1.05 
 -13 -20   1    0.66    0.67 
 -13 -20   1    2.67    3.49 
 -13 -20   1    2.23    2.27 
 -13 -20   1    1.42    1.05 
 -13 -20   1   -1.59    1.42 
 -13 -20   1    2.56    1.50 
 -13 -20   1    0.69    1.03 
 -12 -20   1    1.51    1.59 
 -12 -20   1    0.72    1.43 
 -12 -20   1   -0.17    1.69 
 -12 -20   1    0.80    0.56 
 -12 -20   1    0.98    2.59 
 -12 -20   1   -0.77    3.20 
 -11 -20   1    1.07    0.64 
 -11 -20   1   -3.86    2.83 
 -11 -20   1    0.16    2.63 
 -11 -20   1    2.39    1.64 
 -11 -20   1    1.90    1.62 
 -11 -20   1    0.33    1.66 
  10  20  -1   11.32    3.58 
 -10 -20   1   16.45    4.88 
 -10 -20   1   21.88    3.20 
 -10 -20   1   27.01    5.00 
 -10 -20   1   14.24    3.54 
 -10 -20   1   19.08    6.34 
 -10 -20   1   13.78    3.68 
   9  20  -1    1.87    1.82 
  -9 -20   1    0.65    2.41 
  -9 -20   1    2.69    1.36 
  -9 -20   1   -5.04    3.47 
  -9 -20   1    0.59    0.60 
  -9 -20   1    0.76    1.58 
  -9 -20   1    0.54    1.81 
   8  20  -1    4.72    1.93 
  -8 -20   1    7.79    2.71 
  -8 -20   1    1.52    1.92 
  -8 -20   1    9.20    1.42 
  -8 -20   1    4.46    1.74 
  -8 -20   1    6.71    3.48 
  -8 -20   1    5.66    4.44 
   7  20  -1    6.17    2.10 
  -7 -20   1    7.00    4.11 
  -7 -20   1    7.61    1.58 
  -7 -20   1    7.71    2.23 
   6  20  -1    1.27    1.44 
  -6 -20   1    0.90    0.64 
  -6 -20   1   -1.69    3.10 
  -6 -20   1    0.39    1.89 
   5  20  -1    0.25    1.40 
  -5 -20   1    1.96    1.64 
  -5 -20   1    3.64    3.54 
  -5 -20   1    2.39    0.77 
   4  20  -1   -1.30    1.33 
  -4 -20   1    0.34    1.51 
  -4 -20   1    0.07    3.26 
   3  20  -1    1.26    1.53 
  -3 -20   1    0.42    3.40 
  -3 -20   1   -1.29    1.48 
   2  20  -1    2.57    1.49 
  -2 -20   1    1.31    3.44 
  -2 -20   1    1.35    1.64 
   1  20  -1    0.03    1.37 
  -1 -20   1   -0.30    0.99 
  -1 -20   1    0.54    0.27 
  -1 -20   1    0.17    0.93 
  -1 -20   1    0.34    1.97 
   0  20  -1   -1.10    1.32 
   0 -20   1   -0.07    0.23 
   0 -20   1   -0.60    1.46 
   0 -20   1    0.39    0.98 
  -1  20  -1    3.49    1.50 
  -1  20  -1    0.69    0.95 
   1 -20   1    0.70    1.00 
   1 -20   1   -1.77    1.40 
  -2  20  -1    0.72    1.28 
  -2  20  -1   -0.75    0.89 
   2 -20   1   -1.93    0.90 
   2 -20   1   -0.34    1.44 
  -3  20  -1    1.25    0.90 
  -3  20  -1    0.03    1.29 
   3 -20   1    0.37    0.88 
   3 -20   1    1.66    1.50 
  -4  20  -1    1.55    0.88 
  -4  20  -1    0.72    1.28 
   4 -20   1    0.20    0.86 
   4 -20   1    1.01    1.41 
  -5  20  -1    1.87    0.93 
  -5  20  -1    2.53    1.35 
  -6  20  -1    2.30    0.92 
 -21 -19   1   -0.58    0.75 
 -20 -19   1    0.57    1.16 
 -20 -19   1   -0.55    0.82 
 -19 -19   1    1.05    0.97 
 -19 -19   1    1.42    0.95 
 -19 -19   1    0.17    1.28 
 -18 -19   1    2.39    1.61 
 -18 -19   1    0.30    0.95 
 -18 -19   1   -0.17    0.98 
 -18 -19   1    1.08    1.28 
 -17 -19   1    1.51    1.50 
 -17 -19   1    3.42    1.18 
 -17 -19   1    2.86    1.69 
 -17 -19   1    1.86    1.12 
 -16 -19   1   -0.71    0.98 
 -16 -19   1    0.90    1.60 
 -16 -19   1   -1.26    1.25 
 -16 -19   1    0.88    1.09 
 -15 -19   1    0.49    1.09 
 -15 -19   1    2.93    1.74 
 -15 -19   1    0.42    1.42 
 -15 -19   1    1.38    1.11 
 -15 -19   1    2.50    0.71 
 -14 -19   1   -3.32    2.37 
 -14 -19   1   -0.09    1.36 
 -14 -19   1    2.03    1.69 
 -14 -19   1   -0.51    1.59 
 -14 -19   1   -1.18    1.27 
 -14 -19   1   -0.32    0.45 
 -13 -19   1    2.74    0.76 
 -13 -19   1    0.08    2.80 
 -13 -19   1    1.45    1.40 
 -13 -19   1   -0.75    1.41 
 -13 -19   1    2.69    1.73 
 -13 -19   1   -0.97    2.55 
 -13 -19   1    1.33    1.70 
 -12 -19   1    2.90    1.57 
 -12 -19   1    0.42    2.89 
 -12 -19   1   -0.73    2.54 
 -12 -19   1    3.12    1.63 
 -12 -19   1   -0.04    1.67 
 -12 -19   1    1.93    0.72 
 -12 -19   1    0.62    1.40 
 -11 -19   1   -0.21    0.50 
 -11 -19   1   -2.90    2.24 
 -11 -19   1    3.70    3.99 
 -11 -19   1   -0.37    1.43 
 -11 -19   1   -1.59    1.36 
 -11 -19   1   -0.30    1.25 
 -10 -19   1   -0.40    2.79 
 -10 -19   1    4.21    3.49 
 -10 -19   1    5.61    2.13 
 -10 -19   1    0.05    1.57 
 -10 -19   1    4.18    1.51 
 -10 -19   1    2.33    0.76 
   9  19  -1    1.34    1.42 
  -9 -19   1    0.99    0.73 
  -9 -19   1    0.97    1.58 
  -9 -19   1    0.46    1.55 
  -9 -19   1    0.85    3.19 
  -9 -19   1   -0.50    1.25 
  -9 -19   1   -0.93    2.26 
   8  19  -1    5.40    1.94 
  -8 -19   1    7.32    2.47 
  -8 -19   1    4.75    3.60 
  -8 -19   1    4.94    1.78 
  -8 -19   1    7.77    1.40 
  -8 -19   1    3.97    1.99 
  -8 -19   1    5.60    3.36 
   7  19  -1    3.68    1.61 
  -7 -19   1    2.85    0.85 
  -7 -19   1    3.63    3.06 
  -7 -19   1    1.05    1.24 
  -7 -19   1   -1.58    1.98 
  -7 -19   1    0.69    1.50 
  -7 -19   1    0.23    2.94 
   6  19  -1   -0.48    1.57 
  -6 -19   1    3.73    3.35 
  -6 -19   1    0.94    0.60 
  -6 -19   1   -1.07    1.73 
   5  19  -1   10.39    2.53 
  -5 -19   1    7.90    4.72 
  -5 -19   1    3.09    2.30 
  -5 -19   1   12.81    1.95 
   4  19  -1    1.44    1.44 
  -4 -19   1    2.70    0.79 
  -4 -19   1    2.55    1.88 
  -4 -19   1    2.53    3.45 
   3  19  -1   -0.53    1.34 
  -3 -19   1   -0.37    1.87 
  -3 -19   1   -2.23    2.79 
   2  19  -1   -2.23    1.23 
  -2 -19   1    0.65    1.85 
  -2 -19   1    0.79    3.33 
   1  19  -1    1.71    1.39 
  -1 -19   1   -2.38    1.41 
  -1 -19   1   -1.32    3.71 
   0  19  -1    0.62    1.34 
   0 -19   1    1.30    1.57 
   0 -19   1   -2.33    2.93 
  -1  19  -1    8.41    2.35 
   1 -19   1    5.58    2.14 
   1 -19   1    5.68    4.08 
  -2  19  -1    0.71    1.31 
  -2  19  -1   -0.26    0.92 
   2 -19   1    1.70    1.62 
   2 -19   1   -0.28    0.95 
  -3  19  -1    2.37    1.44 
  -3  19  -1    0.20    0.89 
   3 -19   1    1.67    0.99 
   3 -19   1   -0.62    1.43 
  -4  19  -1    5.15    1.87 
  -4  19  -1    6.51    1.50 
   4 -19   1    5.72    2.05 
   4 -19   1    6.53    1.49 
  -5  19  -1   -0.21    1.20 
  -5  19  -1   -0.56    0.83 
  -6  19  -1   -0.70    0.82 
 -20 -18   1    0.12    0.86 
 -20 -18   1   -1.29    1.14 
 -19 -18   1   -0.55    1.23 
 -19 -18   1    0.29    0.91 
 -18 -18   1   -0.25    0.91 
 -18 -18   1    1.21    1.51 
 -18 -18   1   -0.65    1.23 
 -18 -18   1   -0.02    1.00 
 -17 -18   1    1.59    1.64 
 -17 -18   1    1.24    1.11 
 -17 -18   1    1.01    1.45 
 -17 -18   1    3.35    1.14 
 -16 -18   1   -0.20    1.49 
 -16 -18   1    0.35    1.00 
 -16 -18   1   -0.12    1.36 
 -16 -18   1   -1.15    0.98 
 -15 -18   1    0.01    1.48 
 -15 -18   1   -0.20    1.59 
 -15 -18   1    0.50    1.37 
 -15 -18   1    1.40    2.41 
 -14 -18   1    0.99    2.36 
 -14 -18   1   -0.70    0.53 
 -14 -18   1    1.28    1.72 
 -14 -18   1    3.07    1.42 
 -14 -18   1    0.34    1.59 
 -13 -18   1    7.58    2.68 
 -13 -18   1    7.38    2.38 
 -13 -18   1    6.73    2.40 
 -13 -18   1    6.28    3.36 
 -13 -18   1    9.77    1.66 
 -13 -18   1    6.68    2.22 
 -12 -18   1   -1.99    1.87 
 -12 -18   1    1.24    1.45 
 -12 -18   1    0.36    1.69 
 -12 -18   1   -0.46    1.24 
 -12 -18   1    0.78    0.58 
 -12 -18   1    1.67    3.07 
 -12 -18   1   -2.46    1.96 
 -11 -18   1   -0.43    1.52 
 -11 -18   1    5.74    3.28 
 -11 -18   1    2.52    1.78 
 -11 -18   1    2.32    1.40 
 -11 -18   1    1.48    1.83 
 -11 -18   1    3.59    2.97 
 -11 -18   1    0.08    0.50 
 -10 -18   1    0.04    1.52 
 -10 -18   1    0.61    0.61 
 -10 -18   1    0.29    1.39 
 -10 -18   1   -1.80    3.14 
 -10 -18   1    2.56    1.30 
 -10 -18   1   -0.09    1.38 
 -10 -18   1    1.16    2.96 
  -9 -18   1    5.55    2.02 
  -9 -18   1    2.04    0.76 
  -9 -18   1   -0.25    2.89 
  -9 -18   1    1.80    1.30 
  -9 -18   1    2.08    2.42 
  -9 -18   1    3.41    2.06 
  -8 -18   1   -1.16    2.43 
  -8 -18   1   -1.43    1.33 
  -8 -18   1   -0.42    1.12 
  -8 -18   1    6.56    3.64 
  -8 -18   1    2.80    0.72 
  -8 -18   1    0.90    1.79 
   7  18  -1   18.79    4.30 
  -7 -18   1   13.35    5.52 
  -7 -18   1   16.23    4.29 
  -7 -18   1   12.71    4.84 
  -7 -18   1   29.35    5.33 
  -7 -18   1   25.55    3.90 
  -7 -18   1   24.55    4.37 
   6  18  -1    2.23    1.31 
  -6 -18   1   -2.64    2.46 
  -6 -18   1    1.15    2.52 
  -6 -18   1    0.02    1.63 
  -6 -18   1   -0.78    1.55 
  -6 -18   1   -1.81    1.21 
  -6 -18   1    0.36    0.52 
   5  18  -1    2.97    1.61 
  -5 -18   1    0.13    3.42 
  -5 -18   1   -0.54    1.34 
  -5 -18   1    0.37    0.68 
   4  18  -1   -0.06    1.25 
  -4 -18   1    1.53    1.41 
  -4 -18   1    1.22    2.74 
  -4 -18   1    1.41    0.73 
   3  18  -1    3.76    1.69 
  -3 -18   1    7.72    1.97 
  -3 -18   1    5.76    3.62 
   2  18  -1   -0.15    1.29 
  -2 -18   1    2.39    3.07 
  -2 -18   1    0.50    1.53 
   1  18  -1   10.92    2.43 
  -1 -18   1    8.15    2.38 
  -1 -18   1    2.52    3.51 
   0  18  -1    1.40    1.44 
   0 -18   1    2.34    2.05 
   0 -18   1   -2.21    2.95 
  -1  18  -1   -0.03    1.31 
   1 -18   1   -3.47    2.89 
   1 -18   1    1.04    1.66 
  -2  18  -1    1.75    1.36 
   2 -18   1   -1.17    1.48 
   2 -18   1    1.47    3.91 
  -3  18  -1   -2.57    1.40 
   3 -18   1   -0.24    1.53 
   3 -18   1    2.92    4.05 
  -4  18  -1   -0.50    0.91 
  -4  18  -1   -0.11    1.59 
   4 -18   1   -2.97    0.88 
   4 -18   1    0.50    1.52 
  -5  18  -1    2.80    1.42 
  -5  18  -1    1.62    1.01 
   5 -18   1    2.21    2.03 
  -6  18  -1   -0.81    1.16 
  -6  18  -1   -1.36    0.85 
 -19 -17   1    0.98    1.16 
 -19 -17   1    0.49    1.25 
 -18 -17   1    1.55    1.06 
 -18 -17   1    0.14    1.39 
 -18 -17   1    2.42    1.10 
 -18 -17   1    1.03    1.52 
 -17 -17   1    2.31    1.95 
 -17 -17   1    1.94    1.14 
 -17 -17   1    1.65    1.10 
 -17 -17   1    1.03    1.40 
 -16 -17   1    3.22    1.71 
 -16 -17   1    3.09    1.63 
 -16 -17   1    2.92    2.14 
 -16 -17   1    3.64    3.01 
 -15 -17   1    2.05    1.42 
 -15 -17   1   -0.87    3.10 
 -15 -17   1    0.74    1.49 
 -15 -17   1    1.31    1.39 
 -14 -17   1    2.14    3.09 
 -14 -17   1    1.50    1.38 
 -14 -17   1    2.22    1.62 
 -14 -17   1   -1.62    1.52 
 -13 -17   1   -0.32    1.30 
 -13 -17   1    1.93    1.60 
 -13 -17   1    0.19    1.42 
 -13 -17   1    0.50    2.37 
 -13 -17   1   -0.95    1.73 
 -12 -17   1    0.00    1.51 
 -12 -17   1    2.18    1.71 
 -12 -17   1    2.47    1.61 
 -12 -17   1    1.75    1.33 
 -12 -17   1    0.25    2.76 
 -12 -17   1   -0.69    2.37 
 -12 -17   1    1.29    0.63 
 -11 -17   1   -0.02    2.61 
 -11 -17   1    0.92    0.47 
 -11 -17   1   -2.39    1.28 
 -11 -17   1    0.03    1.19 
 -11 -17   1    2.25    1.34 
 -11 -17   1    1.21    2.22 
 -11 -17   1    0.52    1.64 
 -10 -17   1   -0.08    3.23 
 -10 -17   1    3.08    1.49 
 -10 -17   1    5.45    2.11 
 -10 -17   1    5.51    2.17 
 -10 -17   1    4.15    0.88 
 -10 -17   1    0.31    2.00 
 -10 -17   1    4.37    1.62 
  -9 -17   1    0.45    0.47 
  -9 -17   1    2.86    1.60 
  -9 -17   1   -0.87    2.02 
  -9 -17   1    2.23    1.45 
  -9 -17   1   -1.86    2.60 
  -9 -17   1   -1.43    1.33 
  -9 -17   1    0.76    1.60 
  -8 -17   1    4.84    2.79 
  -8 -17   1    0.90    1.15 
  -8 -17   1    2.39    1.58 
  -8 -17   1    2.01    1.40 
  -8 -17   1    4.15    3.68 
  -8 -17   1    0.21    0.60 
  -7 -17   1    2.48    2.15 
  -7 -17   1   -0.53    1.61 
  -7 -17   1   -2.18    2.44 
  -7 -17   1   -0.39    1.60 
  -7 -17   1    1.23    0.62 
  -7 -17   1   -1.01    1.30 
   6  17  -1   -0.64    1.08 
  -6 -17   1    5.18    3.08 
  -6 -17   1    0.11    1.84 
  -6 -17   1   -0.05    1.56 
  -6 -17   1    0.22    1.24 
  -6 -17   1    0.02    0.47 
   5  17  -1    8.38    2.21 
  -5 -17   1   10.23    2.90 
  -5 -17   1    5.68    3.71 
  -5 -17   1    7.05    2.24 
  -5 -17   1   12.38    4.28 
  -5 -17   1    9.18    1.70 
   4  17  -1    5.64    1.63 
  -4 -17   1    2.83    1.60 
  -4 -17   1    3.54    2.90 
  -4 -17   1    4.39    1.00 
   3  17  -1    4.35    1.70 
  -3 -17   1    4.96    3.06 
  -3 -17   1    4.94    1.11 
  -3 -17   1    7.10    1.90 
   2  17  -1   -0.16    1.15 
  -2 -17   1    0.62    1.79 
  -2 -17   1    2.91    2.94 
   1  17  -1    1.17    1.62 
  -1 -17   1    5.87    2.07 
  -1 -17   1   -2.33    2.67 
   0  17  -1    8.92    2.34 
   0 -17   1   13.73    4.97 
   0 -17   1    8.48    2.55 
   1 -17   1   26.10    6.69 
   1 -17   1   22.92    4.74 
  -2  17  -1    1.60    1.37 
   2 -17   1    4.28    4.47 
   2 -17   1   -0.79    1.49 
  -3  17  -1    0.45    1.29 
   3 -17   1    0.60    1.53 
   3 -17   1   -6.09    3.29 
  -4  17  -1    2.58    1.46 
   4 -17   1    6.40    4.35 
   4 -17   1    2.06    1.68 
  -5  17  -1   -0.14    1.03 
  -5  17  -1    1.91    1.36 
  -5  17  -1    0.39    0.31 
   5 -17   1    0.66    1.53 
  -6  17  -1   -0.11    0.24 
  -6  17  -1   -0.08    0.90 
  -6  17  -1   -0.26    1.25 
  -7  17  -1    1.39    0.36 
  -8  17  -1    0.90    0.35 
  -9  17  -1    0.20    0.29 
 -10  17  -1   -0.66    0.25 
 -11  17  -1    1.26    0.33 
 -19 -16   1    1.83    1.33 
 -19 -16   1    0.67    1.33 
 -18 -16   1    0.84    1.59 
 -18 -16   1   -1.58    0.94 
 -18 -16   1   -0.22    1.26 
 -17 -16   1    0.51    1.52 
 -17 -16   1    2.52    3.02 
 -17 -16   1    0.48    1.11 
 -17 -16   1   -0.79    1.37 
 -16 -16   1    0.16    1.60 
 -16 -16   1    1.29    1.43 
 -16 -16   1    1.16    2.44 
 -16 -16   1    4.14    1.52 
 -15 -16   1    2.09    1.90 
 -15 -16   1    2.31    1.44 
 -15 -16   1    2.03    3.15 
 -15 -16   1   -1.06    1.20 
 -14 -16   1   23.58    6.72 
 -14 -16   1   35.66    5.77 
 -14 -16   1   25.03    5.33 
 -14 -16   1   24.48    5.25 
 -13 -16   1    1.64    1.60 
 -13 -16   1    8.18    3.55 
 -13 -16   1    1.38    1.83 
 -13 -16   1    1.76    1.33 
 -12 -16   1    2.41    1.49 
 -12 -16   1    4.98    2.03 
 -12 -16   1    3.03    2.50 
 -12 -16   1    7.47    3.86 
 -12 -16   1    3.18    1.66 
 -12 -16   1    2.01    1.42 
 -11 -16   1   -1.37    0.87 
 -11 -16   1    1.71    2.94 
 -11 -16   1    1.06    2.43 
 -11 -16   1    0.83    1.20 
 -11 -16   1   -0.35    0.47 
 -11 -16   1    0.31    1.34 
 -11 -16   1   -1.87    1.18 
 -10 -16   1    8.26    2.27 
 -10 -16   1   10.94    4.27 
 -10 -16   1    9.89    3.24 
 -10 -16   1   10.10    2.26 
 -10 -16   1    8.85    1.65 
 -10 -16   1    6.31    2.36 
 -10 -16   1    6.29    2.23 
  -9 -16   1   -3.29    2.83 
  -9 -16   1    1.19    1.45 
  -9 -16   1    0.25    1.35 
  -9 -16   1    1.75    1.35 
  -9 -16   1   -0.83    1.29 
  -9 -16   1    0.50    0.53 
  -9 -16   1   -0.35    1.68 
  -8 -16   1   -0.73    1.00 
  -8 -16   1    2.20    1.80 
  -8 -16   1    3.39    1.67 
  -8 -16   1    0.03    2.30 
  -8 -16   1   -0.43    2.56 
  -8 -16   1    1.64    0.62 
  -8 -16   1    2.09    1.17 
  -7 -16   1    1.73    1.70 
  -7 -16   1   -0.88    1.15 
  -7 -16   1   -0.08    2.85 
  -7 -16   1    0.10    3.11 
  -7 -16   1    0.73    1.36 
  -7 -16   1    1.42    1.95 
  -7 -16   1    0.72    1.28 
  -7 -16   1    0.05    0.53 
  -6 -16   1   -1.30    1.20 
  -6 -16   1   -1.28    3.18 
  -6 -16   1    0.43    0.46 
  -6 -16   1   -0.28    1.24 
  -6 -16   1    2.15    1.89 
  -6 -16   1   -0.31    0.95 
  -6 -16   1    0.57    3.02 
   5  16  -1    4.51    1.40 
  -5 -16   1    3.79    3.39 
  -5 -16   1    5.39    2.07 
  -5 -16   1    3.77    1.51 
  -5 -16   1    1.90    1.98 
  -5 -16   1    2.95    0.82 
  -5 -16   1    0.15    4.56 
  -5 -16   1    3.54    1.48 
   4  16  -1    5.47    1.99 
  -4 -16   1    6.57    2.35 
  -4 -16   1    8.28    3.96 
  -4 -16   1    7.76    1.47 
  -4 -16   1    7.07    1.96 
   3  16  -1   28.93    6.22 
  -3 -16   1   37.73    5.96 
  -3 -16   1   22.49    7.25 
  -3 -16   1   34.24    6.35 
   2  16  -1    0.77    1.20 
  -2 -16   1    1.25    1.47 
  -2 -16   1    3.94    2.85 
  -2 -16   1    0.96    0.59 
   1  16  -1   14.42    3.06 
  -1 -16   1   11.16    2.91 
  -1 -16   1   15.37    5.22 
   0  16  -1   24.05    4.17 
   0 -16   1   15.92    3.90 
   0 -16   1   17.31    5.52 
  -1  16  -1   31.59    5.73 
   1 -16   1   18.53    6.76 
   1 -16   1   30.41    5.68 
  -2  16  -1   21.50    3.78 
   2 -16   1   23.28    6.27 
   2 -16   1   11.42    3.47 
  -3  16  -1    6.74    2.01 
   3 -16   1    3.85    2.20 
   3 -16   1    2.79    3.37 
  -4  16  -1    9.97    2.67 
   4 -16   1   10.08    4.26 
   4 -16   1   10.53    2.84 
  -5  16  -1    2.20    1.36 
   5 -16   1    2.41    4.16 
   5 -16   1   -2.17    1.37 
  -6  16  -1    1.02    1.29 
  -7  16  -1   -0.25    1.23 
  -7  16  -1    0.22    0.29 
  -8  16  -1    1.82    0.49 
  -9  16  -1   -0.30    0.34 
 -10  16  -1    0.02    0.27 
 -11  16  -1   -0.21    0.25 
 -12  16  -1    3.67    0.70 
 -18 -15   1    0.65    1.32 
 -18 -15   1   -0.97    1.50 
 -17 -15   1    1.79    1.58 
 -17 -15   1    5.50    2.00 
 -17 -15   1    8.10    1.94 
 -17 -15   1    3.49    3.55 
 -16 -15   1    1.21    1.36 
 -16 -15   1    1.64    1.35 
 -16 -15   1    0.75    1.54 
 -16 -15   1    1.65    2.57 
 -15 -15   1    1.25    2.97 
 -15 -15   1   -1.06    1.40 
 -15 -15   1    2.60    1.30 
 -15 -15   1    0.04    1.33 
 -14 -15   1   -0.23    1.29 
 -14 -15   1    1.57    1.53 
 -14 -15   1    0.59    3.00 
 -14 -15   1    0.63    1.29 
 -13 -15   1    6.09    3.78 
 -13 -15   1   11.13    2.62 
 -13 -15   1    7.87    2.60 
 -13 -15   1   17.65    3.01 
 -12 -15   1   -0.44    2.34 
 -12 -15   1   -0.50    1.45 
 -12 -15   1    0.70    1.27 
 -12 -15   1    0.34    1.41 
 -12 -15   1    1.08    2.57 
 -12 -15   1    0.43    1.11 
 -11 -15   1    3.78    2.79 
 -11 -15   1    6.78    2.03 
 -11 -15   1    7.15    3.14 
 -11 -15   1    6.49    1.88 
 -11 -15   1    9.93    2.16 
 -11 -15   1    4.94    1.96 
 -10 -15   1    4.58    3.31 
 -10 -15   1    3.13    1.61 
 -10 -15   1    5.79    1.08 
 -10 -15   1    4.55    6.09 
 -10 -15   1    4.78    1.58 
 -10 -15   1    3.68    2.00 
 -10 -15   1    7.71    2.09 
 -10 -15   1    3.40    2.49 
  -9 -15   1    8.07    5.36 
  -9 -15   1    8.86    2.76 
  -9 -15   1   10.11    6.40 
  -9 -15   1   11.04    2.53 
  -9 -15   1   13.38    4.55 
  -9 -15   1    9.64    3.66 
  -9 -15   1   13.05    2.51 
  -9 -15   1   10.50    2.61 
  -9 -15   1    5.32    4.36 
  -9 -15   1   11.68    2.07 
  -8 -15   1    3.90    1.37 
  -8 -15   1    3.75    1.54 
  -8 -15   1   -1.06    4.41 
  -8 -15   1    5.16    2.94 
  -8 -15   1    0.30    2.62 
  -8 -15   1    4.20    0.84 
  -8 -15   1    1.66    1.40 
  -8 -15   1    2.10    2.07 
  -8 -15   1    2.69    1.46 
  -8 -15   1    2.97    5.49 
  -7 -15   1    0.61    2.87 
  -7 -15   1   -0.15    1.26 
  -7 -15   1    2.51    1.49 
  -7 -15   1    1.05    0.44 
  -7 -15   1   -0.59    1.70 
  -7 -15   1    0.30    2.24 
  -7 -15   1   -0.89    1.20 
  -7 -15   1    1.60    3.92 
  -7 -15   1   -3.29    3.00 
  -7 -15   1    0.52    1.23 
  -6 -15   1    0.22    0.42 
  -6 -15   1   -2.18    4.19 
  -6 -15   1    6.61    5.24 
  -6 -15   1   -1.59    1.20 
  -6 -15   1   -1.77    1.16 
  -6 -15   1   -0.53    0.98 
  -6 -15   1   -0.03    1.72 
  -6 -15   1   -2.86    1.91 
  -6 -15   1    0.09    1.16 
  -6 -15   1    0.70    3.05 
  -5 -15   1    6.10    4.98 
  -5 -15   1   11.94    5.05 
  -5 -15   1   11.50    2.82 
  -5 -15   1    7.39    2.00 
  -5 -15   1    8.92    2.18 
  -5 -15   1    4.53    3.55 
  -5 -15   1    6.14    2.74 
  -5 -15   1    9.56    1.68 
   4  15  -1    0.98    0.99 
  -4 -15   1    3.29    1.95 
  -4 -15   1    0.60    1.19 
  -4 -15   1   -1.86    1.14 
  -4 -15   1    1.71    2.88 
  -4 -15   1    1.81    1.48 
  -4 -15   1    0.71    0.57 
  -4 -15   1    1.85    4.02 
  -4 -15   1    3.03    3.50 
   3  15  -1    2.14    1.17 
  -3 -15   1   -1.50    4.63 
  -3 -15   1   -0.67    2.29 
  -3 -15   1    1.48    1.74 
  -3 -15   1    0.88    0.53 
  -3 -15   1    1.42    1.28 
   2  15  -1   -0.83    1.01 
  -2 -15   1    0.90    0.50 
  -2 -15   1   -6.83    3.48 
  -2 -15   1    0.53    1.31 
  -2 -15   1    1.11    3.05 
   1  15  -1    1.62    1.25 
  -1 -15   1    0.67    2.38 
  -1 -15   1    3.34    1.77 
  -1 -15   1    6.52    5.73 
   0  15  -1   44.50    8.18 
   0 -15   1   47.19    8.24 
   0 -15   1   37.58    9.40 
  -1  15  -1   -0.16    1.23 
   1 -15   1   -0.09    1.66 
   1 -15   1    1.57    2.69 
  -2  15  -1   13.06    2.83 
   2 -15   1   19.29    5.50 
   2 -15   1   11.77    2.91 
  -3  15  -1    7.85    2.08 
   3 -15   1    8.52    3.79 
   3 -15   1    8.71    2.55 
  -4  15  -1   29.38    5.98 
   4 -15   1   36.37    6.28 
  -5  15  -1    2.30    1.57 
   5 -15   1    0.52    1.79 
   5 -15   1   -0.54    3.48 
  -6  15  -1    2.51    1.56 
   6 -15   1   -0.20    1.35 
  -7  15  -1   -1.25    1.11 
  -8  15  -1    2.17    0.51 
  -9  15  -1    4.20    0.82 
 -10  15  -1   -0.15    0.30 
 -11  15  -1    4.87    0.92 
 -13  15  -1   -0.71    0.71 
 -13  15  -1   -0.10    0.25 
 -17 -14   1    0.37    1.19 
 -17 -14   1   -1.44    1.45 
 -17 -14   1    3.63    2.64 
 -17 -14   1    0.60    1.56 
 -16 -14   1    0.51    2.94 
 -16 -14   1    1.52    1.62 
 -16 -14   1    0.93    1.39 
 -16 -14   1    2.58    1.27 
 -15 -14   1    3.14    2.56 
 -15 -14   1   -0.21    1.05 
 -15 -14   1   -0.30    1.76 
 -15 -14   1    1.01    1.30 
 -14 -14   1    0.67    1.28 
 -14 -14   1   -0.39    2.46 
 -14 -14   1    1.12    1.18 
 -14 -14   1    0.28    1.37 
 -13 -14   1    4.34    1.99 
 -13 -14   1   15.39    2.47 
 -13 -14   1    6.44    3.44 
 -13 -14   1    7.22    2.46 
 -12 -14   1    2.15    1.20 
 -12 -14   1    1.28    1.36 
 -12 -14   1    1.21    2.45 
 -12 -14   1    6.44    1.71 
 -12 -14   1    2.43    2.79 
 -11 -14   1   12.53    6.68 
 -11 -14   1   21.79    4.36 
 -11 -14   1   30.77    8.01 
 -11 -14   1   17.16    5.63 
 -11 -14   1   28.88    4.81 
 -11 -14   1   18.25    4.35 
 -11 -14   1   20.82    5.39 
 -11 -14   1   28.25    4.73 
 -10 -14   1    0.41    2.44 
 -10 -14   1    3.56    1.55 
 -10 -14   1    1.69    2.48 
 -10 -14   1    0.90    1.23 
 -10 -14   1    1.83    2.01 
 -10 -14   1    0.61    5.35 
 -10 -14   1    2.04    4.20 
 -10 -14   1    4.32    1.43 
 -10 -14   1    1.26    1.43 
  -9 -14   1   20.07    3.85 
  -9 -14   1   24.86    4.51 
  -9 -14   1   14.90    5.25 
  -9 -14   1   18.20    5.09 
  -9 -14   1   22.83    4.25 
  -9 -14   1   16.76    6.69 
  -9 -14   1   23.02    4.60 
  -9 -14   1   27.88    4.39 
  -9 -14   1   15.78    7.12 
  -9 -14   1   27.78    6.90 
  -8 -14   1   -0.12    0.43 
  -8 -14   1   -2.20    1.14 
  -8 -14   1    1.62    2.64 
  -8 -14   1   -1.05    1.58 
  -8 -14   1   -1.16    4.73 
  -8 -14   1    0.62    1.15 
  -8 -14   1   -0.48    2.07 
  -8 -14   1   -0.74    1.02 
  -8 -14   1   -0.16    1.17 
  -8 -14   1   -4.15    2.50 
  -7 -14   1    2.50    0.68 
  -7 -14   1   -2.39    4.27 
  -7 -14   1   -0.88    3.22 
  -7 -14   1    2.43    1.33 
  -7 -14   1    2.56    1.35 
  -7 -14   1   -0.17    2.98 
  -7 -14   1    0.80    2.37 
  -7 -14   1    1.52    1.60 
  -7 -14   1    1.84    1.97 
  -7 -14   1    4.47    1.60 
  -6 -14   1    1.60    1.16 
  -6 -14   1    0.95    1.57 
  -6 -14   1    8.36    4.57 
  -6 -14   1    2.07    2.81 
  -6 -14   1   -0.52    0.46 
  -6 -14   1    1.20    1.19 
  -6 -14   1   -2.85    3.18 
  -6 -14   1    0.66    1.20 
  -6 -14   1    0.61    0.99 
  -6 -14   1   -1.01    2.69 
  -5 -14   1    1.87    2.88 
  -5 -14   1    3.21    2.07 
  -5 -14   1    1.81    0.56 
  -5 -14   1    4.12    3.99 
  -5 -14   1    3.86    1.41 
  -5 -14   1    0.68    2.28 
  -5 -14   1   -0.36    1.15 
  -5 -14   1    5.01    4.46 
  -5 -14   1    2.76    1.10 
  -5 -14   1    3.70    1.40 
  -4 -14   1   11.44    1.97 
  -4 -14   1    9.77    2.37 
  -4 -14   1   11.55    5.85 
  -4 -14   1    7.47    4.86 
  -4 -14   1    9.68    3.57 
  -4 -14   1    9.68    2.84 
  -4 -14   1    8.17    4.68 
  -4 -14   1    8.39    2.85 
  -4 -14   1   10.20    2.41 
   3  14  -1   15.13    3.04 
  -3 -14   1   15.10    3.59 
  -3 -14   1   16.14    3.92 
  -3 -14   1   11.90    5.98 
  -3 -14   1   13.94    4.32 
  -3 -14   1   10.66    5.18 
  -3 -14   1   14.16    3.07 
  -3 -14   1   14.61    2.70 
   2  14  -1    1.68    1.22 
  -2 -14   1    3.29    0.82 
  -2 -14   1   -3.43    4.78 
  -2 -14   1    4.60    1.63 
  -2 -14   1    1.52    2.45 
   1  14  -1    7.19    1.80 
  -1 -14   1    1.56    4.05 
  -1 -14   1    6.77    1.89 
  -1 -14   1    6.72    1.40 
  -1 -14   1    7.52    3.76 
   0  14  -1   57.48   10.43 
   0 -14   1   56.87   12.06 
   0 -14   1   58.61   10.45 
  -1  14  -1    1.33    1.19 
   1 -14   1    2.55    1.37 
   1 -14   1   -0.40    4.31 
   1 -14   1    0.60    2.87 
  -2  14  -1   -0.47    1.41 
   2 -14   1    0.10    2.51 
   2 -14   1    0.30    1.38 
  -3  14  -1    0.93    1.16 
   3 -14   1    0.24    1.63 
   3 -14   1    0.55    2.63 
  -4  14  -1    1.01    1.13 
   4 -14   1    2.07    2.81 
   4 -14   1    2.41    1.63 
  -5  14  -1    1.88    1.29 
   5 -14   1    1.74    1.69 
   5 -14   1    1.02    2.77 
  -6  14  -1    3.06    1.68 
   6 -14   1    3.49    4.65 
   6 -14   1    4.27    1.62 
  -7  14  -1    2.23    1.39 
  -9  14  -1    3.62    0.74 
 -10  14  -1    0.15    0.33 
 -11  14  -1    1.04    0.38 
 -11  14  -1    1.59    1.06 
 -12  14  -1    3.75    0.69 
 -12  14  -1    2.44    1.07 
 -13  14  -1   -0.12    0.80 
  13 -14   1    2.74    2.43 
 -14  14  -1   -0.37    0.26 
 -14  14  -1    0.08    0.72 
 -17 -13   1    1.21    1.57 
 -17 -13   1    1.61    1.41 
 -16 -13   1    0.60    1.23 
 -16 -13   1    0.97    1.06 
 -16 -13   1    0.41    2.16 
 -16 -13   1   -1.80    1.35 
 -15 -13   1    0.87    1.37 
 -15 -13   1   -0.74    2.00 
 -15 -13   1   -1.23    0.94 
 -15 -13   1   -0.68    1.44 
 -14 -13   1    5.80    1.99 
 -14 -13   1    5.61    1.85 
 -14 -13   1    4.71    2.78 
 -14 -13   1    9.00    1.96 
 -13 -13   1    9.27    2.74 
 -13 -13   1   13.87    3.10 
 -13 -13   1   13.14    4.25 
 -13 -13   1   15.71    2.85 
 -12 -13   1    1.06    2.33 
 -12 -13   1   -0.19    1.15 
 -12 -13   1   -0.15    3.97 
 -12 -13   1    1.61    2.35 
 -12 -13   1    0.54    1.52 
 -12 -13   1    0.31    1.02 
 -11 -13   1   -2.23    2.10 
 -11 -13   1   -0.29    1.13 
 -11 -13   1    0.80    2.24 
 -11 -13   1    0.78    1.13 
 -11 -13   1    2.03    3.81 
 -11 -13   1    0.93    0.95 
 -11 -13   1   -0.17    2.46 
 -11 -13   1   -2.40    4.23 
 -11 -13   1    0.76    1.56 
 -10 -13   1   11.34    2.71 
 -10 -13   1   14.14    2.84 
 -10 -13   1    7.85    3.24 
 -10 -13   1   11.68    5.95 
 -10 -13   1    7.68    3.54 
 -10 -13   1   13.58    5.93 
 -10 -13   1   14.16    2.61 
 -10 -13   1   14.34    4.53 
 -10 -13   1   10.55    2.65 
  -9 -13   1    0.22    1.07 
  -9 -13   1    6.18    2.49 
  -9 -13   1   -0.38    0.97 
  -9 -13   1    0.08    1.05 
  -9 -13   1    0.92    3.26 
  -9 -13   1    0.74    2.34 
  -9 -13   1   -2.62    2.38 
  -9 -13   1    1.73    1.44 
  -9 -13   1    1.58    3.89 
  -8 -13   1    1.92    2.78 
  -8 -13   1    3.41    1.39 
  -8 -13   1    2.43    2.24 
  -8 -13   1    0.74    4.30 
  -8 -13   1    2.51    1.59 
  -8 -13   1   -0.16    2.15 
  -8 -13   1    1.02    1.14 
  -8 -13   1    2.85    3.20 
  -8 -13   1    3.55    1.51 
  -7 -13   1    7.19    4.60 
  -7 -13   1    5.90    1.35 
  -7 -13   1    3.52    2.42 
  -7 -13   1    2.14    2.20 
  -7 -13   1    0.70    3.02 
  -7 -13   1    1.82    1.63 
  -7 -13   1    5.19    1.63 
  -7 -13   1    1.34    1.19 
  -7 -13   1    2.80    3.08 
  -6 -13   1    8.23    5.12 
  -6 -13   1    9.20    3.00 
  -6 -13   1   10.51    4.18 
  -6 -13   1   10.48    2.46 
  -6 -13   1    6.91    2.46 
  -6 -13   1   13.75    5.15 
  -6 -13   1   11.95    2.39 
  -6 -13   1   11.21    3.50 
  -5 -13   1   28.37    6.54 
  -5 -13   1   34.26    6.19 
  -5 -13   1   26.26    8.12 
  -5 -13   1   37.29    7.37 
  -5 -13   1   44.74    9.02 
  -5 -13   1   24.35    7.90 
  -5 -13   1   29.10    5.43 
  -5 -13   1   31.27    5.74 
  -5 -13   1   30.76    5.73 
  -4 -13   1   11.77    5.83 
  -4 -13   1   13.52    3.89 
  -4 -13   1   17.59    5.95 
  -4 -13   1   15.46    5.16 
  -4 -13   1   15.89    2.82 
  -4 -13   1   14.63    3.21 
  -4 -13   1   15.06    4.31 
  -4 -13   1   16.63    3.47 
   3  13  -1    1.78    1.29 
  -3 -13   1    1.17    1.30 
  -3 -13   1   -0.39    2.47 
  -3 -13   1    2.68    4.10 
  -3 -13   1   -0.33    2.58 
  -3 -13   1    1.92    0.57 
  -3 -13   1    2.60    2.47 
  -3 -13   1    1.65    1.69 
  -3 -13   1    3.25    1.24 
   2  13  -1    1.00    0.98 
  -2 -13   1   -0.34    0.41 
  -2 -13   1   -0.30    1.05 
  -2 -13   1    0.65    1.44 
  -2 -13   1   -1.19    1.89 
  -2 -13   1   -3.99    3.93 
   1  13  -1    5.40    1.55 
  -1 -13   1    2.86    2.57 
  -1 -13   1    2.70    1.83 
  -1 -13   1    6.50    1.25 
  -1 -13   1    7.77    4.23 
   0  13  -1    3.27    1.38 
   0 -13   1   -0.48    2.19 
   0 -13   1    2.28    1.31 
   0 -13   1   -6.17    3.87 
  -1  13  -1    3.50    1.36 
   1 -13   1   -2.98    3.13 
   1 -13   1    7.97    3.17 
   1 -13   1    4.40    1.52 
  -2  13  -1    2.37    1.16 
   2 -13   1    0.35    1.23 
   2 -13   1    4.43    5.07 
   2 -13   1    0.74    2.38 
  -3  13  -1   53.60    8.97 
   3 -13   1   53.54    9.00 
   3 -13   1   42.75   10.08 
   3 -13   1   19.85   10.47 
  -4  13  -1    3.69    1.41 
   4 -13   1    4.13    6.89 
   4 -13   1    4.97    2.84 
   4 -13   1    5.65    1.68 
  -5  13  -1    0.27    1.10 
   5 -13   1    1.26    1.25 
   5 -13   1    0.62    2.46 
  -6  13  -1    2.65    1.51 
   6 -13   1   -1.51    2.60 
   6 -13   1    2.40    1.64 
  -7  13  -1    5.83    1.73 
  -8  13  -1    7.16    2.03 
   8 -13   1    7.95    2.71 
   9 -13   1    4.19    1.82 
 -10  13  -1    0.47    0.35 
  10 -13   1    0.91    1.92 
 -11  13  -1    0.05    0.88 
  11 -13   1   -0.39    1.52 
 -12  13  -1    0.03    0.89 
 -12  13  -1    0.18    0.33 
  12 -13   1   -1.83    1.49 
 -13  13  -1    5.17    1.13 
 -13  13  -1    2.66    0.65 
  13 -13   1    2.63    1.39 
 -14  13  -1    7.69    1.53 
  14 -13   1    4.09    1.97 
 -15  13  -1    0.11    0.20 
 -15  13  -1   -0.77    0.75 
 -17 -12   1   -0.10    1.77 
 -16 -12   1    2.35    2.93 
 -16 -12   1   -0.64    1.34 
 -16 -12   1    2.04    1.21 
 -15 -12   1    2.26    1.45 
 -15 -12   1   -1.64    1.68 
 -15 -12   1    1.05    1.22 
 -14 -12   1   -0.48    1.37 
 -14 -12   1   -3.03    1.54 
 -14 -12   1    0.88    0.85 
 -14 -12   1   -0.31    1.88 
 -13 -12   1    4.20    2.75 
 -13 -12   1    2.17    1.20 
 -13 -12   1    0.65    1.29 
 -13 -12   1   -0.92    4.88 
 -13 -12   1    1.19    0.87 
 -13 -12   1    0.43    1.96 
 -12 -12   1    3.68    2.53 
 -12 -12   1    5.27    1.37 
 -12 -12   1    3.79    1.84 
 -12 -12   1    0.87    3.48 
 -12 -12   1    2.18    1.39 
 -12 -12   1    7.10    2.96 
 -11 -12   1    0.72    0.97 
 -11 -12   1    5.81    1.76 
 -11 -12   1    4.70    1.34 
 -11 -12   1    2.11    2.30 
 -11 -12   1    2.28    2.10 
 -11 -12   1   -2.51    2.94 
 -11 -12   1    1.41    2.05 
 -11 -12   1    2.49    4.42 
 -10 -12   1    4.22    4.45 
 -10 -12   1    0.23    3.88 
 -10 -12   1    4.29    1.53 
 -10 -12   1    3.90    2.26 
 -10 -12   1    1.33    1.33 
 -10 -12   1    0.06    1.95 
 -10 -12   1    4.69    2.66 
 -10 -12   1    9.74    1.74 
 -10 -12   1   10.58    3.27 
  -9 -12   1   32.34    7.10 
  -9 -12   1   27.76    5.27 
  -9 -12   1   28.49    6.40 
  -9 -12   1   15.27    6.71 
  -9 -12   1   24.72    7.30 
  -9 -12   1   29.39    5.19 
  -9 -12   1   23.81    5.93 
  -9 -12   1   26.68    5.26 
  -8 -12   1   -1.57    2.02 
  -8 -12   1    0.31    0.94 
  -8 -12   1    4.04    3.67 
  -8 -12   1    2.04    2.55 
  -8 -12   1    0.48    1.07 
  -8 -12   1   -0.58    1.43 
  -8 -12   1    4.40    4.09 
  -7 -12   1    7.10    2.04 
  -7 -12   1    2.83    4.07 
  -7 -12   1   13.35    3.45 
  -7 -12   1   11.88    4.02 
  -7 -12   1    4.22    3.74 
  -7 -12   1    6.76    2.64 
  -6 -12   1    1.87    2.18 
  -6 -12   1    0.67    2.09 
  -6 -12   1    0.80    1.04 
  -6 -12   1    1.60    2.70 
  -6 -12   1    4.97    4.35 
  -6 -12   1    3.49    1.80 
  -5 -12   1   12.54    4.18 
  -5 -12   1   11.15    3.27 
  -5 -12   1   10.56    2.40 
  -5 -12   1    4.67    4.56 
  -5 -12   1    4.91    4.21 
  -5 -12   1    7.91    2.96 
  -4 -12   1   47.33    9.76 
  -4 -12   1   60.08   10.51 
  -4 -12   1   45.98    7.45 
  -4 -12   1   28.67    7.72 
  -4 -12   1   26.47    8.81 
  -4 -12   1   38.18    8.37 
  -3 -12   1   27.31    8.37 
  -3 -12   1   35.12    8.23 
  -3 -12   1   27.11    6.78 
  -3 -12   1   38.31    6.25 
  -3 -12   1   31.28    7.96 
  -3 -12   1   26.90    6.30 
  -2 -12   1   -2.14    0.96 
  -2 -12   1   -0.84    2.61 
  -2 -12   1    4.88    4.14 
  -2 -12   1   -1.59    2.55 
  -2 -12   1    0.81    1.42 
  -2 -12   1    4.24    2.44 
  -1 -12   1    6.33    5.00 
  -1 -12   1    7.87    2.60 
  -1 -12   1   15.23    3.71 
   0 -12   1    9.33    3.33 
   0 -12   1    7.82    4.24 
  -1  12  -1   -0.04    1.01 
   1 -12   1   -0.47    1.96 
   1 -12   1    2.75    1.15 
   1 -12   1    1.94    4.07 
  -2  12  -1   10.14    1.95 
   2 -12   1    1.31    2.64 
   2 -12   1    3.87    4.65 
   2 -12   1    7.85    1.94 
  -3  12  -1   26.54    4.86 
   3 -12   1   20.51    5.76 
   3 -12   1   26.35    4.88 
   3 -12   1   17.24    6.96 
  -4  12  -1   -0.42    0.97 
   4 -12   1   -1.15    4.28 
   4 -12   1   -0.68    1.04 
   4 -12   1    4.05    2.59 
  -5  12  -1    2.76    1.51 
   5 -12   1    1.63    4.45 
   5 -12   1    2.20    1.33 
   5 -12   1    1.33    3.05 
  -6  12  -1    3.94    1.34 
   6 -12   1    2.76    2.48 
   6 -12   1    1.39    1.27 
   6 -12   1    7.00    3.05 
  -7  12  -1    6.66    1.75 
   7 -12   1    4.69    1.84 
   7 -12   1    9.78    3.71 
  -8  12  -1    1.42    1.52 
   8 -12   1    0.73    2.69 
   8 -12   1    2.11    1.51 
   9 -12   1   10.70    2.42 
   9 -12   1   -0.84    2.79 
  10 -12   1   -1.57    2.59 
  10 -12   1    2.80    1.65 
 -11  12  -1   17.79    3.06 
 -11  12  -1   14.85    2.72 
  11 -12   1   12.43    3.43 
 -12  12  -1    6.37    1.25 
 -12  12  -1    8.38    1.63 
  12 -12   1    5.06    2.22 
 -13  12  -1   -0.67    0.84 
  13 -12   1   -0.50    1.48 
 -14  12  -1    2.33    0.50 
 -14  12  -1    1.63    0.94 
  14 -12   1    0.84    1.64 
 -15  12  -1   -0.21    0.57 
 -15  12  -1   -0.49    0.20 
  15 -12   1   -0.78    1.32 
 -16 -11   1    0.21    1.46 
 -15 -11   1    0.29    1.14 
 -15 -11   1    1.54    1.67 
 -15 -11   1    1.96    2.50 
 -14 -11   1    0.37    2.47 
 -14 -11   1   -4.75    6.06 
 -14 -11   1    1.98    1.41 
 -14 -11   1    1.88    1.20 
 -13 -11   1    0.34    1.38 
 -13 -11   1   -0.77    1.39 
 -13 -11   1   -0.34    1.29 
 -13 -11   1    2.74    4.14 
 -13 -11   1    3.71    2.23 
 -13 -11   1    1.07    0.75 
 -12 -11   1    6.85    2.48 
 -12 -11   1   16.07    3.86 
 -12 -11   1    7.81    2.35 
 -12 -11   1   16.52    2.41 
 -12 -11   1   11.32    3.76 
 -12 -11   1    4.74    5.14 
 -11 -11   1    1.25    0.79 
 -11 -11   1    3.60    3.98 
 -11 -11   1    2.10    2.26 
 -11 -11   1    0.70    1.11 
 -11 -11   1   -0.77    1.35 
 -11 -11   1    0.97    2.05 
 -11 -11   1    0.64    1.49 
 -10 -11   1    4.67    3.70 
 -10 -11   1    5.16    2.98 
 -10 -11   1    9.00    1.83 
 -10 -11   1    3.94    2.61 
 -10 -11   1    9.98    3.08 
 -10 -11   1   11.30    4.63 
 -10 -11   1    6.37    1.83 
 -10 -11   1    7.95    2.03 
  -9 -11   1   18.09    6.87 
  -9 -11   1   22.84    5.61 
  -9 -11   1   12.31    6.15 
  -9 -11   1   17.84    4.80 
  -9 -11   1   23.88    4.23 
  -9 -11   1   25.42    5.40 
  -8 -11   1   50.94    9.02 
  -8 -11   1   25.26    6.84 
  -8 -11   1   40.52    6.69 
  -8 -11   1   23.04    5.49 
  -8 -11   1   45.80    8.84 
  -8 -11   1   37.50    6.92 
  -7 -11   1   19.52    4.31 
  -7 -11   1   11.99    5.63 
  -7 -11   1   17.47    3.59 
  -7 -11   1   21.65    4.55 
  -7 -11   1   13.66    5.19 
  -7 -11   1   17.11    5.00 
  -6 -11   1    3.49    3.02 
  -6 -11   1    0.88    1.03 
  -6 -11   1    2.03    2.86 
  -6 -11   1    3.29    2.12 
  -6 -11   1    2.99    2.42 
  -6 -11   1    3.65    1.85 
  -5 -11   1   -1.47    1.59 
  -5 -11   1    2.31    2.41 
  -5 -11   1   -0.47    3.09 
  -5 -11   1    1.04    1.10 
  -5 -11   1    5.33    4.08 
  -5 -11   1    0.86    1.80 
  -4 -11   1   66.92   11.37 
  -4 -11   1   62.57   13.14 
  -4 -11   1   54.44   12.43 
  -4 -11   1   57.61   12.40 
  -4 -11   1   64.31   11.17 
  -4 -11   1   54.36   10.74 
  -3 -11   1    7.24    4.27 
  -3 -11   1    6.29    2.13 
  -3 -11   1   12.56    3.09 
  -3 -11   1    2.39    2.83 
  -3 -11   1    8.92    3.86 
  -3 -11   1   10.68    2.64 
  -2 -11   1    2.46    2.99 
  -2 -11   1    0.52    2.23 
  -2 -11   1   -0.26    1.44 
  -2 -11   1   -1.09    1.95 
  -2 -11   1    1.20    2.79 
  -2 -11   1   -0.59    0.94 
  -1 -11   1   -0.31    0.98 
  -1 -11   1    2.18    3.07 
  -1 -11   1   -3.17    1.92 
  -1 -11   1    1.68    2.21 
  -1 -11   1   -0.47    1.33 
  -1 -11   1    2.26    2.61 
   0 -11   1   23.20    7.49 
   0 -11   1   30.52    6.46 
   1 -11   1    1.60    3.24 
   1 -11   1   -0.99    1.94 
   2 -11   1   36.72    9.44 
   2 -11   1   37.34    7.89 
  -3  11  -1    6.43    1.83 
   3 -11   1    6.63    2.71 
   3 -11   1    7.90    4.81 
   3 -11   1    6.34    1.88 
  -4  11  -1   14.58    2.98 
   4 -11   1   13.81    3.02 
   4 -11   1   17.72    4.30 
   4 -11   1   19.61    4.72 
   4 -11   1   10.09    5.25 
  -5  11  -1   24.68    4.76 
   5 -11   1   23.69    7.05 
   5 -11   1    7.66    6.67 
   5 -11   1   27.05    6.07 
   5 -11   1   29.07    4.87 
   5 -11   1   23.46    6.10 
  -6  11  -1    4.97    1.43 
   6 -11   1    5.79    2.51 
   6 -11   1    2.11    1.59 
   6 -11   1    3.06    5.14 
   6 -11   1    7.10    3.28 
   6 -11   1    1.32    3.85 
  -7  11  -1    0.56    1.22 
   7 -11   1   -0.73    2.54 
   7 -11   1    2.37    1.86 
   7 -11   1    0.50    2.16 
  -8  11  -1    4.99    1.57 
   8 -11   1    7.17    3.22 
   9 -11   1    5.99    3.73 
 -10  11  -1    7.03    1.43 
  10 -11   1    3.99    3.15 
 -11  11  -1    7.92    1.64 
  11 -11   1    3.13    3.54 
  11 -11   1    7.61    2.33 
 -12  11  -1   21.38    3.88 
 -12  11  -1   22.74    3.67 
 -12  11  -1   17.60    3.78 
  12 -11   1   19.48    4.34 
 -13  11  -1    1.43    0.70 
 -13  11  -1    1.19    0.42 
 -13  11  -1    0.67    0.92 
  13 -11   1    0.46    1.74 
 -14  11  -1    1.23    0.66 
 -14  11  -1    0.63    0.90 
  14 -11   1   -0.08    1.51 
 -15  11  -1   -0.06    0.32 
  15 -11   1    0.86    1.58 
 -16  11  -1    1.40    0.41 
 -16  11  -1    1.53    0.69 
 -16 -10   1   -1.53    1.56 
 -15 -10   1    0.44    1.36 
 -14 -10   1    2.43    2.75 
 -14 -10   1    6.14    2.01 
 -14 -10   1   -1.24    4.33 
 -14 -10   1    8.37    2.02 
 -14 -10   1   11.99    2.70 
 -13 -10   1   23.96    4.20 
 -13 -10   1   20.03    4.00 
 -13 -10   1   14.63    5.00 
 -13 -10   1   14.01    6.97 
 -13 -10   1   21.49    4.90 
 -12 -10   1    7.62    1.97 
 -12 -10   1    5.61    2.10 
 -12 -10   1    2.59    2.31 
 -12 -10   1    6.50    4.04 
 -12 -10   1   13.70    2.97 
 -11 -10   1   -0.25    1.01 
 -11 -10   1    0.08    1.42 
 -11 -10   1   -3.25    3.32 
 -11 -10   1    0.99    1.71 
 -11 -10   1    2.39    0.69 
 -11 -10   1   -2.24    1.68 
 -10 -10   1    2.56    2.41 
 -10 -10   1    4.67    3.28 
 -10 -10   1    3.35    2.42 
 -10 -10   1    2.03    0.83 
 -10 -10   1    0.97    1.74 
 -10 -10   1   -0.05    3.25 
  -9 -10   1   31.39    5.16 
  -9 -10   1   18.52    5.91 
  -9 -10   1   12.62    6.83 
  -9 -10   1   22.01    7.48 
  -9 -10   1   38.62    6.82 
  -8 -10   1   32.56    6.77 
  -8 -10   1   31.82    8.22 
  -8 -10   1   18.59    7.58 
  -8 -10   1   34.29    5.84 
  -8 -10   1   24.22    6.42 
  -8 -10   1   41.01    7.45 
  -7 -10   1    2.18    2.27 
  -7 -10   1    0.50    1.53 
  -7 -10   1    0.34    1.60 
  -7 -10   1    1.58    2.38 
  -7 -10   1    0.62    0.78 
  -7 -10   1   -3.19    2.59 
  -6 -10   1    0.58    2.54 
  -6 -10   1    2.87    1.95 
  -6 -10   1    1.32    0.95 
  -6 -10   1   -0.24    1.91 
  -6 -10   1   -0.10    3.30 
  -6 -10   1    0.09    1.75 
  -5 -10   1    1.37    0.86 
  -5 -10   1    1.55    1.83 
  -5 -10   1   -0.03    1.68 
  -5 -10   1   -0.41    3.02 
  -5 -10   1    2.57    2.41 
  -5 -10   1    0.92    2.83 
  -4 -10   1    4.83    2.77 
  -4 -10   1    4.28    1.37 
  -4 -10   1    0.72    1.94 
  -4 -10   1    6.49    2.57 
  -4 -10   1    0.87    3.10 
  -4 -10   1    6.45    3.11 
  -3 -10   1    6.38    2.67 
  -3 -10   1    2.08    2.63 
  -3 -10   1    2.08    2.91 
  -3 -10   1    2.20    2.35 
  -3 -10   1    4.24    1.98 
  -3 -10   1    4.05    1.39 
  -2 -10   1    6.86    3.68 
  -2 -10   1    9.82    4.73 
  -2 -10   1   10.55    3.46 
  -2 -10   1   15.49    4.42 
  -2 -10   1   12.22    2.91 
  -2 -10   1   14.95    2.91 
  -1 -10   1   -0.30    1.28 
  -1 -10   1    0.10    2.35 
  -1 -10   1    0.91    2.23 
  -1 -10   1   -0.26    1.14 
  -1 -10   1    0.53    2.30 
  -1 -10   1   -0.83    1.56 
   0 -10   1   10.74    3.12 
   0 -10   1    8.13    2.29 
   0 -10   1   12.87    4.32 
   0 -10   1    9.37    3.44 
   0 -10   1    7.04    4.08 
   1 -10   1    1.97    3.04 
   1 -10   1    0.92    2.75 
   1 -10   1    2.77    2.31 
   2 -10   1    5.23    2.04 
   2 -10   1    3.13    3.91 
   2 -10   1    5.49    3.67 
   2 -10   1    4.26    2.34 
   3 -10   1   22.76    5.35 
   3 -10   1   21.91    6.28 
   3 -10   1   29.50    7.53 
   3 -10   1   22.18    5.00 
   4 -10   1    1.11    2.14 
   4 -10   1    5.84    2.67 
   4 -10   1    0.72    3.08 
   4 -10   1    3.16    4.05 
  -5  10  -1   19.26    3.13 
  -5  10  -1   16.31    3.31 
   5 -10   1   16.89    4.17 
   5 -10   1   18.77    4.46 
   5 -10   1   13.24    3.39 
   5 -10   1   13.79    6.13 
   5 -10   1   15.74    6.27 
  -6  10  -1   26.26    4.70 
  -6  10  -1   23.99    4.68 
   6 -10   1   24.52    4.66 
   6 -10   1   24.12    5.71 
   6 -10   1   21.15    7.41 
   6 -10   1   23.93    5.78 
   6 -10   1   18.91    7.24 
  -7  10  -1    7.04    2.00 
  -7  10  -1    6.67    1.58 
  -7  10  -1    8.70    1.93 
   7 -10   1   10.81    4.99 
   7 -10   1    9.16    3.27 
   7 -10   1    6.66    2.80 
   7 -10   1    9.86    2.33 
  -8  10  -1    0.49    0.51 
  -8  10  -1    0.06    0.94 
  -8  10  -1   -0.02    1.19 
   8 -10   1   -2.66    1.86 
  -9  10  -1    6.55    1.23 
   9 -10   1   -0.81    2.19 
  10 -10   1    2.89    2.99 
  11 -10   1    9.65    4.48 
  12 -10   1   -0.81    3.46 
 -13  10  -1    3.74    0.88 
 -13  10  -1    2.79    1.10 
  13 -10   1   -1.12    1.56 
 -14  10  -1   28.77    4.47 
  14 -10   1   15.79    4.78 
 -15  10  -1    0.87    0.64 
 -15  10  -1   -0.03    0.61 
 -15  10  -1    1.68    0.46 
  15 -10   1   -0.64    1.61 
 -16  10  -1    5.13    0.98 
 -16  10  -1    5.76    1.21 
  16 -10   1    5.48    1.97 
 -17  10  -1   -0.20    0.29 
 -16  -9   1    0.65    1.39 
 -15  -9   1    2.90    1.75 
 -14  -9   1    9.34    2.47 
 -14  -9   1   13.52    3.59 
 -13  -9   1    4.90    1.81 
 -13  -9   1    2.26    3.99 
 -13  -9   1   11.78    2.49 
 -13  -9   1    5.64    1.81 
 -13  -9   1    3.25    2.63 
 -12  -9   1    2.06    1.65 
 -12  -9   1    4.76    2.39 
 -12  -9   1    0.39    3.86 
 -12  -9   1    2.36    1.19 
 -12  -9   1    2.87    1.63 
 -11  -9   1   11.22    2.71 
 -11  -9   1    3.18    2.17 
 -11  -9   1    5.88    4.35 
 -10  -9   1    5.24    1.96 
 -10  -9   1    4.74    3.84 
 -10  -9   1    0.27    1.80 
 -10  -9   1    1.18    2.05 
 -10  -9   1    3.23    3.51 
 -10  -9   1    4.95    1.18 
  -9  -9   1    0.61    2.17 
  -9  -9   1    7.89    1.40 
  -9  -9   1    8.49    2.62 
  -9  -9   1    0.67    3.41 
  -9  -9   1    4.54    2.66 
  -9  -9   1    4.09    3.55 
  -8  -9   1   17.20    5.66 
  -8  -9   1   18.77    4.41 
  -8  -9   1   15.55    3.28 
  -8  -9   1   15.75    4.25 
  -8  -9   1   22.43    6.06 
  -8  -9   1   27.99    4.65 
  -7  -9   1   -0.24    1.53 
  -7  -9   1    0.21    2.32 
  -7  -9   1   -1.83    1.76 
  -7  -9   1    1.89    0.73 
  -7  -9   1   -1.79    1.09 
  -7  -9   1    1.51    1.55 
  -6  -9   1   46.80    9.32 
  -6  -9   1   52.13   11.00 
  -6  -9   1   59.88    9.87 
  -6  -9   1   43.82    9.18 
  -6  -9   1   47.36   10.72 
  -6  -9   1   49.17    8.83 
  -5  -9   1   12.08    5.00 
  -5  -9   1   17.26    4.56 
  -5  -9   1   22.99    4.41 
  -5  -9   1   16.80    3.88 
  -5  -9   1   17.92    5.37 
  -5  -9   1   15.79    3.35 
  -4  -9   1   40.20    8.00 
  -4  -9   1   53.48   10.01 
  -4  -9   1   43.70    8.40 
  -4  -9   1   44.33    9.35 
  -4  -9   1   46.39    9.90 
  -4  -9   1   54.47    8.98 
  -3  -9   1   29.05    6.47 
  -3  -9   1   24.22    4.93 
  -3  -9   1   21.34    6.50 
  -3  -9   1   28.54    5.49 
  -3  -9   1   33.21    5.83 
  -3  -9   1   22.53    6.27 
  -2  -9   1    8.92    2.65 
  -2  -9   1    9.45    2.54 
  -2  -9   1    9.74    3.56 
  -2  -9   1    8.10    3.55 
  -2  -9   1    9.52    2.20 
  -2  -9   1    8.64    3.73 
  -1  -9   1   74.36   13.06 
  -1  -9   1   71.93   13.86 
  -1  -9   1   77.93   13.37 
  -1  -9   1   68.98   14.15 
  -1  -9   1   65.58   13.52 
  -1  -9   1   70.70   14.69 
  -1  -9   1   73.23   13.14 
   0  -9   1   23.37    6.13 
   0  -9   1   32.72    6.07 
   0  -9   1   21.55    6.41 
   0  -9   1   22.27    6.53 
   0  -9   1   28.40    6.35 
   0  -9   1   26.12    5.25 
   0  -9   1   28.94    5.36 
   1  -9   1   35.48    9.67 
   1  -9   1   40.75    9.51 
   1  -9   1   44.58    8.44 
   1  -9   1   48.36    9.09 
   1  -9   1   58.02   10.62 
   2  -9   1   23.27    4.34 
   2  -9   1   15.90    5.18 
   2  -9   1   13.57    5.54 
   2  -9   1   17.58    4.39 
   3  -9   1    7.41    2.53 
   3  -9   1    6.29    2.31 
   3  -9   1    2.27    2.92 
   3  -9   1    6.05    4.07 
   4  -9   1    1.54    1.66 
   4  -9   1   -1.88    1.54 
   4  -9   1   -0.32    3.32 
   4  -9   1    3.18    3.70 
  -5   9  -1    0.94    2.52 
   5  -9   1    2.21    3.13 
   5  -9   1    4.79    2.61 
   5  -9   1    3.39    2.26 
   5  -9   1    1.79    2.86 
  -6   9  -1    1.88    1.54 
  -6   9  -1   -0.32    1.52 
  -6   9  -1    0.40    1.39 
  -6   9  -1    1.84    0.57 
   6  -9   1    2.32    2.43 
   6  -9   1    1.12    4.29 
   6  -9   1   -0.26    1.64 
   6  -9   1    0.13    3.04 
  -7   9  -1    0.51    1.15 
  -7   9  -1   -0.07    0.49 
  -7   9  -1   -0.68    0.84 
  -7   9  -1   -0.39    1.28 
   7  -9   1    0.14    1.82 
   7  -9   1   -1.70    1.99 
   7  -9   1   -0.52    3.31 
   7  -9   1    0.31    0.92 
   7  -9   1    6.34    4.74 
  -8   9  -1   -0.43    1.27 
  -8   9  -1    0.04    1.39 
  -8   9  -1   -1.02    1.09 
  -8   9  -1    0.99    0.54 
   8  -9   1   -0.10    2.03 
   8  -9   1    3.00    4.08 
  -9   9  -1    1.58    1.27 
  -9   9  -1    0.23    0.63 
  -9   9  -1    0.96    1.53 
   9  -9   1   -0.02    2.01 
 -10   9  -1    2.81    1.82 
 -10   9  -1    0.49    0.57 
 -10   9  -1    0.00    1.28 
  10  -9   1    3.41    2.59 
 -11   9  -1   10.62    2.79 
 -11   9  -1    4.27    1.10 
 -11   9  -1    6.01    2.07 
  11  -9   1   -0.43    2.71 
 -12   9  -1    4.37    1.17 
 -12   9  -1    2.37    2.60 
  12  -9   1    7.95    3.36 
  13  -9   1    6.43    3.48 
 -14   9  -1   -1.11    0.90 
 -15   9  -1    2.95    1.08 
 -15   9  -1    2.52    0.85 
  15  -9   1    2.80    1.86 
 -16   9  -1   -0.22    0.72 
 -16   9  -1    0.84    0.85 
 -17   9  -1    1.10    0.45 
 -17   9  -1    0.04    0.57 
  17  -9   1   -0.15    1.37 
 -18   9  -1   -0.30    0.28 
 -15  -8   1    0.14    1.55 
 -14  -8   1    0.94    1.56 
 -14  -8   1   -1.60    1.25 
 -13  -8   1    4.95    2.61 
 -13  -8   1    9.90    2.38 
 -13  -8   1    5.41    2.10 
 -12  -8   1    2.01    1.49 
 -12  -8   1    1.63    3.43 
 -12  -8   1    0.72    1.71 
 -12  -8   1    0.43    1.86 
 -11  -8   1    5.15    1.80 
 -11  -8   1    0.58    1.97 
 -11  -8   1    0.25    2.77 
 -10  -8   1   10.98    3.66 
 -10  -8   1   10.00    4.70 
 -10  -8   1   13.58    3.66 
 -10  -8   1   22.98    3.92 
 -10  -8   1   11.78    5.33 
  -9  -8   1   67.17   14.47 
  -9  -8   1   99.80   14.67 
  -9  -8   1   76.74   14.61 
  -9  -8   1   67.13   16.13 
  -9  -8   1   74.15   15.63 
  -8  -8   1    6.52    3.25 
  -8  -8   1    4.34    3.45 
  -8  -8   1   12.86    3.08 
  -8  -8   1    9.87    2.71 
  -8  -8   1    9.40    1.77 
  -8  -8   1   11.57    3.09 
  -7  -8   1    0.34    0.52 
  -7  -8   1    0.50    1.23 
  -7  -8   1   -4.50    2.14 
  -7  -8   1    0.25    1.64 
  -7  -8   1   -1.73    1.74 
  -7  -8   1    1.14    1.87 
  -6  -8   1    1.16    2.44 
  -6  -8   1    2.70    1.92 
  -6  -8   1    0.71    2.10 
  -6  -8   1    2.48    0.88 
  -6  -8   1    1.22    1.25 
  -6  -8   1    3.13    1.68 
  -5  -8   1   -1.16    1.72 
  -5  -8   1   -0.75    1.12 
  -5  -8   1   -0.62    2.55 
  -5  -8   1    1.57    0.78 
  -5  -8   1    0.32    2.60 
  -5  -8   1    0.60    1.57 
  -4  -8   1    1.96    1.59 
  -4  -8   1    0.61    1.52 
  -4  -8   1    1.61    2.22 
  -4  -8   1    1.00    0.65 
  -4  -8   1    0.52    2.50 
  -4  -8   1    2.36    1.45 
  -3  -8   1    6.86    2.16 
  -3  -8   1    8.18    3.15 
  -3  -8   1    2.74    3.09 
  -3  -8   1    8.21    3.34 
  -3  -8   1    6.75    1.63 
  -3  -8   1    6.76    2.27 
  -3  -8   1    7.70    2.36 
  -2  -8   1    0.43    1.01 
  -2  -8   1   -1.51    1.24 
  -2  -8   1    0.21    1.64 
  -2  -8   1   -1.00    1.86 
  -2  -8   1   -1.14    1.45 
  -2  -8   1   -0.42    1.27 
  -2  -8   1    2.71    1.95 
  -1  -8   1   70.77   14.63 
  -1  -8   1   70.15   15.14 
  -1  -8   1   77.25   14.26 
  -1  -8   1   86.67   14.38 
  -1  -8   1  100.12   15.21 
   0  -8   1    0.89    2.22 
   0  -8   1    2.60    1.22 
   0  -8   1    2.15    2.92 
   0  -8   1    3.60    1.94 
   0  -8   1    3.31    2.48 
   0  -8   1    0.85    2.02 
  -1   8  -1   66.68   14.42 
   1  -8   1   67.16   14.47 
   1  -8   1   75.63   13.01 
   1  -8   1   66.22   14.45 
   1  -8   1   69.88   13.25 
   1  -8   1   78.33   13.54 
   1  -8   1   70.98   13.64 
  -2   8  -1    2.70    2.63 
   2  -8   1    1.96    1.64 
   2  -8   1    1.85    1.71 
   2  -8   1   -0.91    2.61 
   2  -8   1    0.03    2.26 
  -3   8  -1   12.81    4.50 
  -3   8  -1    9.13    2.79 
   3  -8   1   18.65    3.48 
   3  -8   1   12.46    4.44 
   3  -8   1   15.10    3.67 
   3  -8   1   12.65    4.57 
  -4   8  -1    5.50    3.25 
  -4   8  -1    2.78    1.41 
   4  -8   1    0.88    2.37 
   4  -8   1    3.14    2.02 
   4  -8   1    3.00    2.71 
   4  -8   1    3.35    2.27 
  -5   8  -1   16.07    3.44 
  -5   8  -1   14.02    5.02 
   5  -8   1    6.45    4.62 
   5  -8   1   13.20    3.63 
   5  -8   1   15.76    5.49 
   5  -8   1   15.88    3.74 
  -6   8  -1    6.76    1.94 
  -6   8  -1    2.05    3.38 
   6  -8   1    4.12    4.05 
   6  -8   1    7.32    3.77 
   6  -8   1    4.32    2.55 
   6  -8   1    5.24    2.64 
  -7   8  -1   -0.26    0.56 
  -7   8  -1   -0.15    1.03 
  -7   8  -1   -0.99    3.08 
  -7   8  -1    3.05    1.46 
   7  -8   1   -0.13    1.94 
   7  -8   1   -2.72    1.91 
   7  -8   1   -1.55    3.55 
   7  -8   1   -4.53    2.63 
  -8   8  -1   13.27    6.05 
  -8   8  -1   11.15    2.28 
  -8   8  -1   13.30    2.88 
  -8   8  -1   13.04    2.43 
  -8   8  -1    9.84    1.93 
   8  -8   1    4.14    2.93 
   8  -8   1    5.73    5.17 
   8  -8   1    6.66    3.21 
  -9   8  -1    6.50    1.68 
  -9   8  -1    1.59    0.71 
  -9   8  -1    3.68    1.75 
  -9   8  -1   -0.15    3.54 
   9  -8   1    4.91    2.30 
   9  -8   1    1.10    3.97 
 -10   8  -1    1.31    1.55 
 -10   8  -1   -0.38    1.20 
 -10   8  -1    1.94    0.62 
  10  -8   1    3.36    2.39 
 -11   8  -1    0.87    1.74 
 -11   8  -1    1.82    1.42 
 -11   8  -1    2.12    0.70 
  11  -8   1    3.36    2.78 
 -12   8  -1    2.60    1.88 
 -12   8  -1    1.72    1.39 
 -12   8  -1    1.19    0.64 
  12  -8   1   -0.20    2.43 
 -13   8  -1    1.52    1.85 
 -13   8  -1    0.65    0.63 
 -13   8  -1    0.97    1.59 
  13  -8   1    2.76    2.99 
 -14   8  -1   20.98    3.63 
 -14   8  -1   17.50    4.75 
  14  -8   1   14.05    5.29 
 -15   8  -1   -0.01    0.93 
 -16   8  -1    3.56    0.89 
 -16   8  -1    3.03    0.91 
  16  -8   1    1.02    1.75 
 -17   8  -1    0.46    0.60 
 -17   8  -1    1.53    0.90 
  17  -8   1    0.85    1.19 
 -18   8  -1    1.30    0.66 
  18  -8   1    1.79    1.26 
 -15  -7   1    0.11    1.24 
 -14  -7   1   32.87    6.71 
 -14  -7   1   38.61    6.89 
 -13  -7   1   13.22    3.26 
 -13  -7   1   16.57    3.50 
 -12  -7   1   -0.06    3.03 
 -12  -7   1    0.11    1.63 
 -12  -7   1   -0.51    1.07 
 -11  -7   1   10.92    3.27 
 -11  -7   1   11.64    4.43 
 -10  -7   1   68.64   13.14 
 -10  -7   1   48.39   12.97 
 -10  -7   1   69.47   12.00 
  -9  -7   1   -0.28    1.70 
  -9  -7   1    0.48    2.69 
  -9  -7   1    1.40    1.58 
  -9  -7   1    0.89    3.02 
  -8  -7   1    1.26    1.28 
  -8  -7   1    0.35    1.75 
  -8  -7   1   -0.15    2.52 
  -8  -7   1    1.17    2.69 
  -8  -7   1    0.16    1.74 
  -7  -7   1   26.70    5.62 
  -7  -7   1   32.31    5.70 
  -7  -7   1   27.69    6.90 
  -7  -7   1   24.73    5.63 
  -7  -7   1   22.28    6.44 
  -6  -7   1    1.69    0.56 
  -6  -7   1   -2.40    2.06 
  -6  -7   1    2.10    1.63 
  -6  -7   1   -0.30    1.63 
  -6  -7   1    1.13    1.34 
  -6  -7   1    0.96    1.61 
  -6  -7   1    0.33    1.28 
  -6  -7   1   -0.90    2.31 
  -5  -7   1   11.78    2.42 
  -5  -7   1   13.40    3.32 
  -5  -7   1   16.37    2.93 
  -5  -7   1   13.43    3.84 
  -5  -7   1    9.30    3.16 
  -4  -7   1   11.98    4.31 
  -4  -7   1   11.79    4.33 
  -4  -7   1   14.25    3.29 
  -4  -7   1   16.86    3.10 
  -4  -7   1   20.95    3.82 
  -4  -7   1   14.24    3.91 
  -4  -7   1   16.38    3.55 
  -4  -7   1   15.66    4.07 
  -3  -7   1   80.49   15.15 
  -3  -7   1   75.51   14.46 
  -3  -7   1   77.48   14.42 
  -3  -7   1  100.30   15.16 
  -3  -7   1   70.53   14.95 
  -3  -7   1   80.51   14.40 
   2   7  -1   -2.23    1.41 
  -2  -7   1    0.64    2.17 
  -2  -7   1    5.37    2.03 
  -2  -7   1    0.24    1.98 
  -2  -7   1    0.83    0.82 
  -2  -7   1    4.89    1.79 
  -2  -7   1    2.04    1.46 
  -2  -7   1    0.62    2.47 
   1   7  -1   -0.77    1.62 
  -1  -7   1    1.78    0.94 
  -1  -7   1   -0.47    1.32 
  -1  -7   1    0.72    0.74 
  -1  -7   1    2.61    2.24 
  -1  -7   1    2.06    1.60 
  -1  -7   1    0.09    1.59 
   0   7  -1    3.49    2.22 
   0  -7   1    3.40    2.65 
   0  -7   1    6.31    2.55 
   0  -7   1    1.62    1.90 
   0  -7   1    4.92    2.19 
   0  -7   1    2.93    2.05 
  -1   7  -1   67.51   12.94 
   1  -7   1   77.21   12.52 
   1  -7   1   64.37   12.21 
   1  -7   1   68.64   13.42 
   1  -7   1   58.80   12.49 
   1  -7   1   63.59   13.41 
  -2   7  -1   14.38    4.19 
   2  -7   1   13.41    4.00 
   2  -7   1    8.56    2.69 
   2  -7   1   11.82    3.12 
   2  -7   1   10.13    3.73 
   2  -7   1   11.86    3.85 
  -3   7  -1  106.88   21.43 
  -3   7  -1  116.27   22.51 
   3  -7   1  133.97   21.71 
   3  -7   1  140.56   22.63 
   3  -7   1  124.30   21.56 
   3  -7   1  116.23   22.28 
  -4   7  -1   -1.53    0.91 
  -4   7  -1    1.31    2.14 
   4  -7   1   -2.19    1.50 
   4  -7   1   -0.66    2.07 
   4  -7   1    1.49    2.94 
   4  -7   1    3.78    1.96 
  -5   7  -1   87.56   17.85 
  -5   7  -1  105.72   19.24 
   5  -7   1  111.88   18.16 
   5  -7   1   98.25   18.02 
   5  -7   1  104.11   19.73 
   5  -7   1  105.51   19.30 
  -6   7  -1   40.84    9.06 
  -6   7  -1   44.03    7.42 
   6  -7   1   28.25    8.46 
   6  -7   1   30.82    8.90 
   6  -7   1   35.61    7.66 
   6  -7   1   36.14    7.50 
  -7   7  -1    6.38    2.04 
  -7   7  -1    5.30    3.45 
   7  -7   1    8.78    2.72 
   7  -7   1    7.98    4.88 
   7  -7   1    6.05    2.47 
   7  -7   1    8.46    4.27 
  -8   7  -1    7.90    1.56 
  -8   7  -1    6.38    2.15 
  -8   7  -1    6.74    4.39 
  -8   7  -1   11.65    2.20 
   8  -7   1    5.33    2.72 
   8  -7   1   11.01    3.24 
   8  -7   1    6.63    4.11 
   8  -7   1   14.41    5.22 
  -9   7  -1   12.50    4.93 
  -9   7  -1   27.03    4.36 
  -9   7  -1   26.96    4.73 
  -9   7  -1   26.14    5.10 
   9  -7   1   25.24    7.70 
   9  -7   1   21.34    5.45 
 -10   7  -1    7.42    1.67 
 -10   7  -1    4.09    0.98 
 -10   7  -1    2.02    2.03 
 -10   7  -1    5.13    3.67 
  10  -7   1    7.85    5.34 
  10  -7   1    3.25    2.38 
 -11   7  -1   17.47    2.90 
 -11   7  -1   13.03    3.23 
 -11   7  -1   13.18    3.57 
  11  -7   1   15.55    4.52 
 -12   7  -1    0.50    1.36 
 -12   7  -1    2.86    1.75 
 -12   7  -1    3.23    0.77 
  12  -7   1    2.18    2.60 
 -13   7  -1    1.80    1.74 
 -13   7  -1   -0.24    0.53 
 -13   7  -1    2.68    1.46 
  13  -7   1   -0.29    2.45 
 -14   7  -1    8.27    2.08 
 -14   7  -1    4.60    1.12 
 -14   7  -1    2.43    2.04 
  14  -7   1    4.70    3.32 
 -15   7  -1    1.60    1.51 
 -15   7  -1    1.03    0.62 
 -15   7  -1   -0.43    1.78 
 -15   7  -1   -1.08    0.91 
 -16   7  -1    4.65    1.34 
 -17   7  -1    0.82    0.63 
 -18   7  -1    0.26    0.54 
  18  -7   1    0.75    1.61 
  19  -7   1    3.16    1.36 
 -15  -6   1   11.67    2.94 
 -14  -6   1    4.59    1.74 
 -14  -6   1    6.73    2.24 
 -13  -6   1    3.64    1.78 
 -13  -6   1    5.57    1.82 
 -12  -6   1   30.53    5.98 
 -11  -6   1    7.22    3.59 
 -11  -6   1    8.61    2.10 
 -11  -6   1    5.41    2.39 
  10   6  -1    0.28    3.58 
 -10  -6   1    6.14    3.62 
 -10  -6   1   -1.55    0.96 
 -10  -6   1    0.11    1.25 
   9   6  -1    0.67    2.06 
  -9  -6   1    2.87    2.69 
  -9  -6   1   -2.09    1.58 
  -9  -6   1   -0.85    2.83 
  -9  -6   1    0.61    0.96 
  -9  -6   1    3.20    1.16 
  -9  -6   1    0.43    1.77 
  -8  -6   1    7.92    2.66 
  -8  -6   1   16.30    4.58 
  -8  -6   1   18.69    3.36 
  -8  -6   1   13.23    3.95 
  -8  -6   1   17.15    3.47 
  -7  -6   1   30.05    6.90 
  -7  -6   1   27.04    6.17 
  -7  -6   1   36.65    5.97 
  -7  -6   1   33.20    5.93 
  -7  -6   1   25.88    6.08 
  -7  -6   1   22.10    6.86 
  -6  -6   1   10.00    3.56 
  -6  -6   1   15.03    4.06 
  -6  -6   1   11.57    2.85 
  -6  -6   1   10.69    2.83 
  -6  -6   1   12.77    3.07 
  -6  -6   1   12.39    2.90 
  -6  -6   1   10.74    2.77 
  -5  -6   1    3.53    2.30 
  -5  -6   1    0.57    1.14 
  -5  -6   1   -0.03    1.40 
  -5  -6   1   -0.02    1.85 
  -5  -6   1    1.31    1.31 
  -5  -6   1    0.69    1.34 
  -4  -6   1   28.02    5.36 
  -4  -6   1   31.55    6.42 
  -4  -6   1   25.32    5.27 
  -4  -6   1   30.04    6.46 
  -4  -6   1   31.49    5.95 
  -3  -6   1   12.90    3.17 
  -3  -6   1   16.54    4.37 
  -3  -6   1   20.88    4.10 
  -3  -6   1   15.75    3.88 
  -3  -6   1   16.06    4.21 
  -2  -6   1    0.40    2.00 
  -2  -6   1   -1.14    1.17 
  -2  -6   1    1.03    1.50 
  -2  -6   1    3.64    2.35 
   1   6  -1    7.07    2.37 
  -1  -6   1    5.05    2.28 
  -1  -6   1    0.59    1.62 
  -1  -6   1    4.14    2.30 
  -1  -6   1    6.01    2.54 
   0   6  -1   49.85   10.04 
   0  -6   1   38.60   10.11 
   0  -6   1   60.68   10.66 
   0  -6   1   49.84    9.50 
   0  -6   1   66.82    9.99 
  -1   6  -1   11.36    4.07 
   1  -6   1   21.93    4.75 
   1  -6   1   16.39    4.17 
   1  -6   1   22.78    4.19 
   1  -6   1    5.77    3.99 
   1  -6   1   28.67    4.15 
  -2   6  -1    2.89    2.58 
   2  -6   1    1.97    2.32 
   2  -6   1    0.43    2.39 
   2  -6   1    2.13    1.57 
   2  -6   1    2.92    2.58 
   2  -6   1    0.08    1.52 
  -3   6  -1    0.56    2.34 
  -3   6  -1    2.72    1.39 
   3  -6   1    6.15    1.82 
   3  -6   1   -2.13    2.04 
   3  -6   1    3.43    1.66 
   3  -6   1    1.30    2.82 
   3  -6   1    0.60    2.16 
  -4   6  -1   -0.92    1.74 
  -4   6  -1    0.07    1.19 
   4  -6   1   -0.41    1.46 
   4  -6   1    2.57    1.67 
   4  -6   1    0.43    2.39 
   4  -6   1    1.89    2.57 
  -5   6  -1   21.18    5.41 
  -5   6  -1   16.27    3.85 
   5  -6   1   17.97    5.36 
   5  -6   1   22.75    4.41 
   5  -6   1   18.28    4.22 
   5  -6   1   21.14    5.87 
  -6   6  -1   86.49   14.89 
  -6   6  -1   92.30   16.22 
   6  -6   1   82.32   16.54 
   6  -6   1   73.91   16.57 
   6  -6   1   67.94   15.02 
   6  -6   1   92.04   15.09 
  -7   6  -1    4.29    3.03 
  -7   6  -1    6.90    1.83 
   7  -6   1    6.54    3.70 
   7  -6   1    6.00    2.62 
   7  -6   1    1.81    2.12 
   7  -6   1    8.51    3.87 
  -8   6  -1   11.14    2.13 
  -8   6  -1   15.48    2.86 
  -8   6  -1    7.60    4.46 
   8  -6   1    5.77    2.93 
   8  -6   1    5.78    4.89 
   8  -6   1   11.30    3.13 
   8  -6   1   13.99    5.06 
  -9   6  -1    0.06    0.52 
  -9   6  -1    0.01    1.01 
  -9   6  -1    0.08    0.98 
  -9   6  -1    1.01    2.71 
   9  -6   1    2.69    2.27 
   9  -6   1   -1.95    2.88 
 -10   6  -1    2.25    3.34 
 -10   6  -1    0.54    1.11 
 -10   6  -1    2.34    1.63 
 -10   6  -1    2.04    0.66 
  10  -6   1   -0.33    3.19 
  10  -6   1   -0.41    2.37 
 -11   6  -1    1.33    1.65 
 -11   6  -1    6.02    4.13 
 -11   6  -1    6.94    1.14 
 -11   6  -1    5.08    1.61 
  11  -6   1   -0.39    2.82 
 -12   6  -1    7.10    1.41 
 -12   6  -1    6.50    2.30 
 -12   6  -1    6.44    1.94 
  12  -6   1    7.44    3.47 
 -13   6  -1    7.29    1.42 
 -13   6  -1    6.65    2.31 
 -13   6  -1    6.17    1.96 
  13  -6   1    2.68    2.95 
 -14   6  -1   16.37    3.90 
 -14   6  -1   16.03    3.67 
 -14   6  -1   15.64    2.93 
  14  -6   1   11.75    4.50 
 -15   6  -1    0.41    0.58 
 -15   6  -1    1.68    1.52 
 -15   6  -1    0.33    1.59 
  15  -6   1    0.67    2.54 
 -16   6  -1   -0.24    1.42 
 -16   6  -1    0.13    0.55 
 -16   6  -1    1.01    0.97 
 -18   6  -1    4.00    1.00 
 -19   6  -1    3.76    0.94 
  19  -6   1    4.22    1.87 
 -20   6  -1   -0.32    0.52 
 -19  -5   1    3.95    1.54 
 -18  -5   1    9.90    2.44 
 -17  -5   1   -0.69    0.99 
 -16  -5   1    2.94    1.12 
 -14  -5   1    6.81    2.45 
 -14  -5   1    7.12    1.99 
 -13  -5   1    6.22    2.13 
 -13  -5   1    6.60    2.02 
 -12  -5   1    8.17    2.26 
 -12  -5   1    4.00    2.81 
  11   5  -1    1.96    3.02 
 -11  -5   1    1.93    3.31 
 -11  -5   1    1.15    1.16 
 -11  -5   1    0.91    1.57 
  10   5  -1  343.45   61.66 
 -10  -5   1  396.39   60.83 
 -10  -5   1  302.42   60.81 
 -10  -5   1  327.53   61.80 
   9   5  -1   39.44   10.01 
  -9  -5   1   48.74    9.06 
  -9  -5   1   45.20    9.16 
  -9  -5   1   47.38    9.28 
  -9  -5   1   58.31    9.16 
  -9  -5   1   56.24   11.13 
  -9  -5   1   52.78   10.22 
   8   5  -1    0.83    2.12 
  -8  -5   1    1.13    2.59 
  -8  -5   1    1.57    0.95 
  -8  -5   1    3.25    2.47 
  -8  -5   1    6.78    1.97 
  -8  -5   1    4.11    1.43 
  -8  -5   1    1.84    0.93 
  -8  -5   1    3.00    1.59 
  -7  -5   1   38.21    7.27 
  -7  -5   1   27.50    5.47 
  -7  -5   1   32.55    6.01 
  -7  -5   1   28.83    6.53 
  -6  -5   1   69.01   14.02 
  -6  -5   1  103.49   14.86 
  -6  -5   1   74.02   14.90 
  -6  -5   1   85.21   14.17 
  -5  -5   1   18.39    5.11 
  -5  -5   1   18.48    4.26 
  -5  -5   1   24.86    4.51 
  -5  -5   1   22.44    5.06 
  -4  -5   1    1.68    1.42 
  -4  -5   1    2.27    1.11 
  -4  -5   1    4.66    2.38 
  -4  -5   1   -1.06    1.96 
  -4  -5   1    1.75    1.27 
  -3  -5   1    4.24    2.42 
  -3  -5   1    4.82    1.82 
  -3  -5   1    5.14    1.38 
  -3  -5   1    3.67    1.79 
  -3  -5   1    5.33    2.61 
  -2  -5   1  180.08   31.93 
  -2  -5   1  158.52   32.31 
  -2  -5   1  202.28   32.37 
  -2  -5   1  182.91   32.38 
   1   5  -1    8.40    3.20 
  -1  -5   1   17.30    3.14 
  -1  -5   1   20.20    4.01 
  -1  -5   1    9.50    3.34 
  -1  -5   1   21.73    3.84 
   0   5  -1   11.99    3.00 
   0  -5   1    4.01    1.92 
   0  -5   1   -0.93    1.81 
   0  -5   1    3.04    1.90 
   0  -5   1   12.06    3.01 
  -1   5  -1    6.84    2.41 
   1  -5   1    3.96    2.47 
   1  -5   1   -0.50    1.44 
   1  -5   1    8.06    2.08 
   1  -5   1   11.92    2.89 
  -2   5  -1   10.58    3.58 
   2  -5   1   14.14    4.06 
   2  -5   1   16.77    3.26 
   2  -5   1   10.41    3.91 
   2  -5   1   14.43    3.85 
  -3   5  -1   10.92    3.33 
  -3   5  -1    8.89    2.15 
   3  -5   1    9.16    2.59 
   3  -5   1   10.61    3.20 
   3  -5   1    6.78    2.42 
   3  -5   1    9.19    3.50 
   3  -5   1   13.43    3.69 
  -4   5  -1    4.06    2.57 
  -4   5  -1    2.78    1.36 
   4  -5   1    4.45    2.50 
   4  -5   1    5.27    2.64 
   4  -5   1    6.43    2.22 
  -5   5  -1   -1.33    2.00 
   5  -5   1    1.65    1.67 
   5  -5   1   10.33    3.23 
   5  -5   1   -1.35    2.40 
  -6   5  -1  149.21   26.49 
  -6   5  -1  142.93   27.53 
   6  -5   1  146.26   26.69 
   6  -5   1  152.71   27.42 
   6  -5   1  164.94   27.74 
  -7   5  -1  141.85   21.51 
  -7   5  -1  106.03   19.97 
   7  -5   1  106.14   22.03 
   7  -5   1  110.60   20.22 
   7  -5   1  121.23   21.13 
   7  -5   1  105.88   20.22 
  -8   5  -1   -0.51    2.65 
  -8   5  -1    2.63    1.42 
   8  -5   1    3.71    3.30 
   8  -5   1   -5.07    2.79 
   8  -5   1    1.21    1.94 
   8  -5   1    2.16    2.27 
  -9   5  -1   29.67    4.37 
  -9   5  -1   18.26    6.28 
  -9   5  -1   20.75    3.86 
  -9   5  -1   17.65    4.39 
   9  -5   1   13.36    5.96 
   9  -5   1   25.11    5.13 
 -10   5  -1    3.91    0.83 
 -10   5  -1    2.74    1.50 
 -10   5  -1    3.06    1.61 
 -10   5  -1    0.01    3.26 
  10  -5   1    1.09    1.86 
  10  -5   1    3.30    3.47 
 -11   5  -1    3.54    1.62 
 -11   5  -1   -2.34    3.21 
 -11   5  -1    3.93    0.88 
 -11   5  -1    7.05    1.69 
  11  -5   1    0.41    3.82 
  11  -5   1    3.12    2.42 
 -12   5  -1    3.51    1.71 
 -12   5  -1    3.85    0.85 
 -12   5  -1    2.59    1.40 
  12  -5   1    2.81    2.63 
 -13   5  -1    1.36    1.77 
 -13   5  -1    1.55    1.23 
 -13   5  -1    1.50    0.66 
  13  -5   1   -0.13    2.19 
 -14   5  -1   33.60    5.50 
 -14   5  -1   26.01    4.81 
 -14   5  -1   24.91    5.63 
  14  -5   1   21.45    6.46 
 -15   5  -1   -0.66    1.34 
 -15   5  -1   -0.01    0.65 
 -15   5  -1   -0.46    1.49 
  15  -5   1   -0.87    2.58 
 -16   5  -1   -1.83    0.61 
 -16   5  -1   -0.91    1.08 
 -16   5  -1   -0.01    1.59 
 -16   5  -1    0.89    1.52 
  16  -5   1    2.45    3.06 
 -17   5  -1   -0.81    0.64 
 -17   5  -1    0.19    1.48 
 -19   5  -1   -0.47    0.86 
 -19   5  -1    0.02    0.55 
 -20   5  -1    0.21    0.55 
 -20   5  -1    0.85    0.55 
  20  -5   1    0.63    1.21 
 -19  -4   1   -1.10    1.42 
 -18  -4   1    0.28    1.24 
 -17  -4   1    2.04    1.24 
 -16  -4   1   -0.71    0.89 
 -15  -4   1   11.66    2.53 
 -14  -4   1    8.90    3.32 
 -14  -4   1   10.23    2.54 
  13   4  -1   15.75    6.17 
 -13  -4   1   18.48    4.66 
 -13  -4   1   19.89    3.96 
  12   4  -1   10.08    4.83 
 -12  -4   1   15.06    3.46 
 -12  -4   1   10.78    3.37 
  11   4  -1   23.26    7.54 
 -11  -4   1   32.39    6.23 
 -11  -4   1   34.81    6.60 
  10   4  -1    2.95    3.16 
 -10  -4   1    5.26    2.42 
 -10  -4   1    5.34    3.53 
 -10  -4   1    9.70    3.05 
 -10  -4   1   14.51    2.60 
   9   4  -1   65.68   13.61 
  -9  -4   1   85.39   14.24 
  -9  -4   1   68.94   12.37 
  -9  -4   1   66.39   12.30 
  -9  -4   1   69.46   12.50 
  -9  -4   1   66.84   12.40 
   8   4  -1    1.87    2.30 
  -8  -4   1    0.90    2.64 
  -8  -4   1    7.03    1.52 
  -8  -4   1    5.22    1.96 
  -8  -4   1    4.66    1.77 
  -8  -4   1    3.26    2.70 
  -8  -4   1    6.95    1.60 
   7   4  -1   44.67    9.95 
  -7  -4   1   48.15    9.39 
  -7  -4   1   53.82    9.14 
  -7  -4   1   51.30    9.14 
  -7  -4   1   47.96   10.48 
  -7  -4   1   52.82   10.18 
  -6  -4   1   59.40   13.56 
  -6  -4   1   58.23   12.92 
  -6  -4   1   77.60   12.52 
  -5  -4   1   52.26   10.16 
  -5  -4   1   62.06   10.76 
  -5  -4   1   65.68   10.46 
  -5  -4   1   69.90   11.02 
  -5  -4   1   52.88   10.15 
  -4  -4   1    4.18    1.28 
  -4  -4   1    0.68    1.95 
  -4  -4   1    1.57    1.65 
  -4  -4   1    4.94    1.28 
  -4  -4   1    0.45    1.26 
  -3  -4   1    2.01    1.52 
  -2  -4   1   56.31   11.10 
  -2  -4   1   58.96   11.56 
  -2  -4   1   72.31   11.47 
  -2  -4   1   67.60   11.47 
   1   4  -1   10.61    2.51 
  -1  -4   1   11.38    2.37 
  -1  -4   1    7.44    1.73 
  -1  -4   1    0.66    1.80 
  -1  -4   1    8.86    2.40 
   0   4  -1   66.16   10.90 
   0  -4   1   47.89   10.60 
   0  -4   1   50.88   10.53 
   0  -4   1   76.77   11.06 
   1  -4   1   58.35   11.14 
   1  -4   1   58.36   11.25 
   1  -4   1   70.99   11.52 
  -2   4  -1  133.23   24.22 
   2  -4   1  152.12   24.15 
   2  -4   1  134.30   23.74 
   2  -4   1  105.62   24.06 
   2  -4   1  147.11   24.36 
  -3   4  -1  100.21   17.38 
   3  -4   1   93.52   17.28 
   3  -4   1   91.89   17.30 
   3  -4   1   89.90   17.41 
  -4   4  -1   77.30   13.14 
  -4   4  -1   71.86   13.01 
  -4   4  -1   72.30   13.79 
   4  -4   1   64.10   13.74 
   4  -4   1   74.76   13.80 
   4  -4   1   73.15   13.37 
   4  -4   1   73.21   13.66 
  -5   4  -1    0.93    1.62 
  -5   4  -1    0.84    1.04 
  -5   4  -1   -0.68    1.13 
   5  -4   1   -1.18    1.56 
   5  -4   1   -0.69    2.09 
   5  -4   1    2.48    2.38 
  -6   4  -1   40.77    7.67 
  -6   4  -1   37.29    7.38 
  -6   4  -1   31.69    8.36 
   6  -4   1   45.44    7.98 
   6  -4   1   47.45    8.93 
   6  -4   1   49.02    9.27 
  -7   4  -1   12.52    3.98 
   7  -4   1   10.40    4.68 
   7  -4   1   10.60    4.08 
   7  -4   1   16.03    3.57 
  -8   4  -1   21.75    5.72 
   8  -4   1   20.59    5.60 
   8  -4   1   15.58    4.13 
   8  -4   1   19.08    5.79 
  -9   4  -1   46.55   10.44 
   9  -4   1   40.34   10.88 
   9  -4   1   48.35   10.38 
   9  -4   1   46.60    9.13 
 -10   4  -1    6.91    1.55 
 -10   4  -1    4.34    1.06 
 -10   4  -1    4.96    3.34 
 -10   4  -1    4.61    1.68 
  10  -4   1    7.39    2.58 
  10  -4   1    8.40    4.77 
 -11   4  -1   19.05    3.45 
 -11   4  -1   21.38    3.91 
 -11   4  -1   12.16    5.27 
 -11   4  -1   20.84    4.10 
  11  -4   1   12.85    5.92 
  11  -4   1   19.05    4.72 
 -12   4  -1    3.89    3.74 
 -12   4  -1    4.46    1.87 
 -12   4  -1    3.30    1.46 
 -12   4  -1    5.41    1.04 
  12  -4   1    1.57    2.80 
 -13   4  -1    5.01    1.90 
 -13   4  -1    2.65    1.39 
 -13   4  -1    3.05    0.78 
  13  -4   1    3.30    2.54 
 -14   4  -1    8.59    2.19 
 -14   4  -1    8.68    1.64 
 -14   4  -1    7.90    2.42 
  14  -4   1    4.89    3.18 
 -15   4  -1   15.21    3.56 
 -15   4  -1   15.57    2.62 
 -15   4  -1   14.09    3.13 
  15  -4   1    4.88    3.60 
 -16   4  -1    0.94    0.57 
 -16   4  -1    0.05    1.48 
 -16   4  -1    0.38    1.87 
  16  -4   1    0.74    2.33 
 -17   4  -1    1.19    1.45 
 -17   4  -1   -0.61    0.48 
 -17   4  -1   -0.51    0.78 
 -18   4  -1    1.87    1.52 
 -18   4  -1    0.08    0.64 
 -18   4  -1    1.04    0.96 
 -19   4  -1   -0.58    0.86 
 -20   4  -1    0.77    0.58 
 -20   4  -1    1.17    0.62 
  20  -4   1    1.50    1.55 
 -21   4  -1    2.24    0.90 
 -18  -3   1   -0.02    1.13 
 -17  -3   1    4.21    1.67 
 -17  -3   1    1.07    1.18 
  16   3  -1   -2.69    1.85 
 -16  -3   1    0.31    1.05 
 -16  -3   1    0.86    1.37 
  15   3  -1    0.47    2.34 
 -15  -3   1   -0.65    1.33 
 -15  -3   1    0.84    0.92 
  14   3  -1    0.22    4.10 
 -14  -3   1    3.12    1.19 
 -14  -3   1    3.04    1.41 
 -14  -3   1    5.56    2.46 
 -14  -3   1    2.56    1.66 
  13   3  -1   -3.32    3.36 
 -13  -3   1    5.18    1.82 
 -13  -3   1    4.61    2.49 
 -13  -3   1    4.51    1.34 
  12   3  -1    9.66    5.19 
 -12  -3   1   16.89    4.04 
 -12  -3   1   15.42    2.82 
 -12  -3   1   12.63    3.63 
  11   3  -1   24.05    6.85 
 -11  -3   1   27.18    5.40 
 -11  -3   1   20.48    5.04 
  10   3  -1   69.88   13.77 
 -10  -3   1   67.54   12.19 
 -10  -3   1   64.84   12.24 
   9   3  -1    5.01    2.26 
   9   3  -1    1.56    2.29 
  -9  -3   1    4.15    1.60 
  -9  -3   1   -0.16    2.22 
  -9  -3   1    2.37    1.64 
  -9  -3   1   -0.08    0.93 
   8   3  -1    0.57    2.00 
   8   3  -1    0.17    1.76 
  -8  -3   1    0.56    0.84 
  -8  -3   1    0.86    1.29 
  -8  -3   1    2.29    2.17 
  -8  -3   1    0.62    1.06 
  -8  -3   1    1.04    1.26 
   7   3  -1  232.31   39.44 
  -7  -3   1  202.82   39.43 
  -7  -3   1  227.51   38.82 
  -7  -3   1  205.79   39.16 
  -7  -3   1  227.16   38.84 
   6   3  -1  114.12   23.61 
  -6  -3   1  119.53   23.82 
  -6  -3   1  150.28   23.21 
  -6  -3   1  142.01   23.20 
  -6  -3   1  103.29   23.49 
  -5  -3   1    4.21    1.95 
  -5  -3   1    6.69    2.47 
  -4  -3   1    7.02    1.53 
  -4  -3   1    7.02    2.22 
  -4  -3   1    7.32    1.56 
  -4  -3   1    6.59    1.99 
  -4  -3   1    4.55    2.49 
  -3  -3   1   24.77    4.75 
  -3  -3   1   27.64    5.27 
  -2  -3   1   18.60    3.55 
  -2  -3   1   19.36    3.91 
  -2  -3   1   25.25    4.30 
   1   3  -1  310.21   56.95 
  -1  -3   1  330.49   57.03 
  -1  -3   1  345.10   56.72 
  -1  -3   1  290.65   56.94 
  -1  -3   1  346.88   57.02 
   0   3  -1   38.47    6.63 
   0  -3   1   32.65    6.47 
   0  -3   1   33.91    6.65 
   0  -3   1   33.83    6.34 
  -1   3  -1  152.63   32.26 
   1  -3   1  206.95   32.12 
   1  -3   1  187.99   32.30 
   1  -3   1  193.03   32.18 
   1  -3   1  169.72   32.33 
  -2   3  -1  148.22   22.85 
   2  -3   1  141.21   22.77 
   2  -3   1  114.59   22.33 
   2  -3   1   98.96   22.56 
   2  -3   1  149.81   22.92 
  -3   3  -1   12.75    3.83 
   3  -3   1   20.03    4.06 
   3  -3   1   16.79    4.10 
   3  -3   1   13.82    3.88 
  -4   3  -1   14.16    3.42 
   4  -3   1   17.24    3.66 
   4  -3   1    6.52    3.02 
   4  -3   1    4.66    3.00 
  -5   3  -1   41.37    7.21 
  -5   3  -1   38.06    7.38 
  -5   3  -1   46.04    8.37 
   5  -3   1   33.28    8.36 
   5  -3   1   35.21    8.30 
  -6   3  -1   20.74    4.20 
  -6   3  -1   18.17    4.83 
   6  -3   1   16.83    4.99 
   6  -3   1   20.66    5.04 
   6  -3   1   18.15    4.20 
  -7   3  -1   21.97    4.57 
  -7   3  -1   20.59    5.73 
  -7   3  -1   26.92    5.15 
   7  -3   1   28.40    6.23 
   7  -3   1   29.94    5.22 
   7  -3   1   23.84    6.16 
  -8   3  -1   34.29    8.05 
  -8   3  -1   38.55    7.19 
  -8   3  -1   32.28    6.54 
   8  -3   1   40.54    8.67 
   8  -3   1   29.67    7.87 
   8  -3   1   42.67    7.25 
  -9   3  -1    0.10    2.30 
  -9   3  -1   -0.58    1.61 
  -9   3  -1    0.43    1.02 
   9  -3   1   -0.46    2.57 
   9  -3   1   -1.09    1.66 
   9  -3   1    2.22    2.88 
 -10   3  -1   11.74    3.71 
  10  -3   1    5.27    4.34 
 -11   3  -1   20.35    3.46 
 -11   3  -1   15.97    3.06 
  11  -3   1   13.56    6.26 
 -12   3  -1   29.36    5.10 
 -12   3  -1   25.27    7.50 
 -12   3  -1   28.51    5.69 
 -12   3  -1   31.51    5.41 
  12  -3   1   33.63    6.89 
  12  -3   1    8.21    6.85 
 -13   3  -1   -1.14    1.03 
 -13   3  -1   -0.29    0.46 
 -13   3  -1   -1.08    1.06 
  13  -3   1   -1.13    1.85 
 -14   3  -1   -0.43    0.51 
 -14   3  -1   -0.76    1.17 
 -14   3  -1   -0.22    1.33 
  14  -3   1    2.93    2.76 
 -15   3  -1   -1.50    1.22 
 -15   3  -1   -1.68    1.36 
 -15   3  -1   -0.99    0.52 
  15  -3   1   -1.65    2.33 
 -16   3  -1   -0.13    0.60 
 -16   3  -1   -0.84    1.30 
 -16   3  -1    0.28    1.34 
  16  -3   1   -1.30    2.40 
 -17   3  -1    7.47    2.44 
 -17   3  -1    4.47    1.07 
 -17   3  -1    2.27    1.64 
  17  -3   1    6.10    3.42 
 -18   3  -1    5.84    1.81 
 -18   3  -1    3.43    1.09 
 -18   3  -1    3.32    1.00 
 -19   3  -1    0.36    0.54 
 -19   3  -1    1.14    0.92 
 -19   3  -1    0.84    1.48 
 -20   3  -1   -0.20    0.81 
 -21   3  -1   -0.22    0.80 
 -21   3  -1    0.56    0.52 
  21  -3   1    1.28    1.08 
 -19  -2   1   -0.70    1.30 
 -18  -2   1    0.40    1.59 
 -18  -2   1    0.13    1.35 
 -17  -2   1    0.53    1.58 
 -17  -2   1    1.73    1.26 
  16   2  -1   -1.72    2.05 
 -16  -2   1    2.30    1.51 
 -16  -2   1   -0.43    1.12 
  15   2  -1    4.81    3.00 
 -15  -2   1    6.02    1.94 
 -15  -2   1    6.06    1.81 
  14   2  -1    5.36    4.70 
  14   2  -1    4.68    2.71 
 -14  -2   1    4.81    1.27 
 -14  -2   1    1.85    1.27 
  13   2  -1    6.49    5.29 
 -13  -2   1    9.95    2.18 
 -13  -2   1    8.00    3.38 
 -13  -2   1    8.24    2.00 
  12   2  -1    0.49    3.63 
 -12  -2   1    3.91    2.46 
 -12  -2   1    6.41    1.41 
  11   2  -1    4.42    3.33 
 -11  -2   1    5.97    2.49 
 -11  -2   1    6.52    1.31 
 -11  -2   1    1.25    2.15 
  10   2  -1  102.02   20.46 
 -10  -2   1  100.07   19.38 
 -10  -2   1  111.13   19.60 
 -10  -2   1  110.26   18.89 
   9   2  -1    3.59    3.36 
  -9  -2   1    7.78    2.27 
  -9  -2   1    7.57    2.18 
   8   2  -1   31.63    6.59 
   8   2  -1   24.92    6.74 
  -8  -2   1   27.92    5.97 
  -8  -2   1   30.84    6.05 
  -8  -2   1   33.49    6.86 
  -8  -2   1   33.45    6.08 
   7   2  -1   17.44    4.46 
   7   2  -1   14.54    4.65 
  -7  -2   1   18.50    4.04 
  -7  -2   1   21.82    4.03 
  -7  -2   1   24.42    4.14 
  -7  -2   1   12.52    4.41 
   6   2  -1   21.23    6.47 
  -6  -2   1   35.34    5.86 
  -6  -2   1   30.05    6.68 
   5   2  -1  322.28   56.00 
  -5  -2   1  323.52   55.86 
  -5  -2   1  309.29   55.58 
  -5  -2   1  316.08   55.60 
  -5  -2   1  323.29   56.05 
   4   2  -1   35.90    6.54 
  -4  -2   1   31.16    6.34 
  -4  -2   1   25.64    6.51 
  -4  -2   1   34.16    5.88 
  -3  -2   1   13.15    3.45 
  -3  -2   1   13.09    3.34 
  -3  -2   1   17.78    3.00 
  -2  -2   1    4.64    0.93 
  -2  -2   1    0.06    1.08 
  -2  -2   1    0.85    0.99 
  -2  -2   1    0.67    0.65 
  -2  -2   1    3.99    0.87 
  -1  -2   1   54.61    8.40 
  -1  -2   1   42.41    8.25 
  -1  -2   1   52.43    8.32 
  -1  -2   1   39.93    8.24 
   0   2  -1    8.92    2.25 
   0  -2   1   11.49    2.33 
   0  -2   1    9.88    2.19 
   0  -2   1    8.21    2.18 
   0  -2   1   11.05    2.02 
  -1   2  -1  172.56   29.34 
   1  -2   1  161.78   29.20 
   1  -2   1  161.37   29.35 
   1  -2   1  164.72   29.30 
   1  -2   1  168.53   29.13 
  -2   2  -1  451.75   77.15 
   2  -2   1  422.12   77.07 
   2  -2   1  437.68   77.08 
   2  -2   1  462.60   77.20 
   2  -2   1  427.43   76.80 
  -3   2  -1   83.49   15.95 
   3  -2   1   92.95   16.03 
   3  -2   1   89.24   15.96 
  -4   2  -1   42.57    7.60 
   4  -2   1   27.14    7.61 
   4  -2   1   48.89    8.15 
  -5   2  -1   26.69    5.01 
  -5   2  -1   18.81    4.95 
  -5   2  -1   19.01    3.94 
  -5   2  -1   28.14    4.50 
   5  -2   1   16.47    4.91 
   5  -2   1   24.08    4.97 
  -6   2  -1   16.53    2.78 
  -6   2  -1   18.95    3.98 
  -6   2  -1    6.89    2.85 
   6  -2   1   13.83    3.84 
  -7   2  -1   39.64    6.25 
  -7   2  -1   21.55    6.47 
  -7   2  -1   33.71    7.30 
   7  -2   1   35.58    6.48 
   7  -2   1   36.96    7.58 
  -8   2  -1   25.82    4.74 
  -8   2  -1   11.55    4.65 
  -8   2  -1   20.97    4.15 
   8  -2   1   22.56    6.04 
   8  -2   1   28.05    4.73 
   8  -2   1   25.72    5.68 
  -9   2  -1    4.88    1.86 
  -9   2  -1    2.38    1.21 
  -9   2  -1    2.42    2.25 
   9  -2   1    4.25    3.03 
   9  -2   1    1.94    3.24 
   9  -2   1    5.55    2.14 
 -10   2  -1    1.40    1.01 
 -10   2  -1   -2.36    1.54 
 -10   2  -1    0.67    1.80 
  10  -2   1    4.30    3.09 
 -11   2  -1   17.26    3.26 
 -11   2  -1   13.41    2.97 
 -11   2  -1   15.46    4.77 
  11  -2   1   10.18    5.34 
 -12   2  -1    4.62    3.70 
 -12   2  -1    9.34    2.05 
  12  -2   1    8.35    4.67 
 -13   2  -1  154.40   27.50 
 -13   2  -1  145.12   25.33 
 -13   2  -1  161.73   25.81 
 -13   2  -1  137.55   25.54 
  13  -2   1  129.18   28.85 
  13  -2   1  132.45   26.23 
 -14   2  -1    0.84    1.17 
 -14   2  -1    0.63    1.28 
 -14   2  -1    1.11    0.52 
  14  -2   1   -0.24    2.14 
 -15   2  -1   20.20    3.97 
 -15   2  -1   27.60    5.01 
 -15   2  -1   23.24    4.46 
  15  -2   1   26.43    5.91 
 -16   2  -1    3.34    1.77 
 -16   2  -1   -0.16    1.21 
 -16   2  -1    0.48    0.56 
  16  -2   1    0.57    2.41 
 -17   2  -1    2.93    1.67 
 -17   2  -1    4.47    0.91 
 -17   2  -1    1.95    1.67 
  17  -2   1    2.07    2.77 
 -18   2  -1    0.56    0.84 
 -18   2  -1   -0.28    1.34 
 -18   2  -1    0.79    0.54 
 -19   2  -1   -0.41    0.70 
 -19   2  -1    1.12    1.49 
 -19   2  -1    0.97    0.55 
 -20   2  -1    0.23    0.51 
 -20   2  -1   -0.36    0.87 
 -21   2  -1    2.95    0.86 
 -22   2  -1    0.03    0.74 
 -22  -1   1    2.37    0.86 
 -21  -1   1    1.14    0.82 
 -21  -1   1    0.17    0.58 
 -20  -1   1    2.70    1.02 
 -19  -1   1   -1.14    0.81 
 -19  -1   1    0.74    1.40 
  18   1  -1    5.03    3.12 
 -18  -1   1    7.63    2.29 
 -18  -1   1    6.48    2.10 
  17   1  -1    3.15    3.03 
 -17  -1   1    5.72    2.05 
 -17  -1   1    7.46    2.25 
  16   1  -1    4.04    2.69 
 -16  -1   1   -1.67    1.43 
 -16  -1   1   -0.43    1.08 
  15   1  -1   12.62    4.67 
 -15  -1   1   15.64    3.39 
 -15  -1   1   19.21    3.69 
  14   1  -1   20.68    5.29 
 -14  -1   1   28.55    4.46 
 -14  -1   1   18.15    4.24 
  13   1  -1    7.54    3.42 
  13   1  -1   12.40    5.97 
 -13  -1   1   13.80    2.93 
 -13  -1   1    9.96    4.08 
 -13  -1   1   17.35    3.16 
 -13  -1   1   14.52    2.96 
  12   1  -1    1.83    3.45 
 -12  -1   1    4.17    1.51 
 -12  -1   1    7.08    3.17 
  11   1  -1   -3.98    3.07 
 -11  -1   1    0.57    1.63 
 -11  -1   1   -0.32    0.65 
  10   1  -1   23.70    7.04 
 -10  -1   1   29.85    5.36 
 -10  -1   1   29.11    6.51 
 -10  -1   1   31.30    6.15 
   9   1  -1   88.40   16.26 
  -9  -1   1   77.66   14.05 
  -9  -1   1   83.37   14.49 
  -9  -1   1   79.69   14.73 
   8   1  -1    2.77    2.12 
   8   1  -1    5.26    2.62 
  -8  -1   1    7.13    1.92 
  -8  -1   1    2.41    2.19 
  -8  -1   1    2.74    0.67 
  -8  -1   1    1.55    1.52 
   7   1  -1   53.56    9.42 
   7   1  -1   36.58    8.31 
  -7  -1   1   46.95    8.05 
  -7  -1   1   39.31    8.45 
  -7  -1   1   36.50    7.83 
  -7  -1   1   47.47    8.10 
   6   1  -1   30.17    5.48 
   6   1  -1   27.14    5.96 
  -6  -1   1   24.10    4.96 
  -6  -1   1   25.51    5.14 
   5   1  -1   46.54    8.13 
   5   1  -1   50.77    8.44 
  -5  -1   1   43.92    7.90 
  -5  -1   1   39.40    7.84 
  -5  -1   1   41.08    8.19 
   4   1  -1    8.62    2.35 
  -4  -1   1    6.40    1.69 
  -4  -1   1    7.20    1.63 
  -4  -1   1    8.07    2.20 
   3   1  -1   12.54    3.12 
  -3  -1   1    9.74    3.05 
  -3  -1   1   16.18    2.68 
  -3  -1   1   16.42    2.72 
  -3  -1   1    9.36    2.84 
   2   1  -1  120.24   22.60 
  -2  -1   1  133.03   22.51 
  -2  -1   1  134.49   22.51 
  -2  -1   1  123.21   22.69 
  -2  -1   1  126.21   22.56 
   1   1  -1  197.88   33.87 
  -1  -1   1  185.00   33.92 
  -1  -1   1  191.55   33.92 
  -1  -1   1  201.83   34.04 
   0   1  -1  298.32   54.20 
   0   1  -1  306.01   54.05 
   0  -1   1  310.64   54.18 
   0  -1   1  314.15   54.20 
   0  -1   1  319.86   54.17 
  -1   1  -1   45.60    8.01 
  -1   1  -1   45.97    8.12 
   1  -1   1   43.65    7.93 
   1  -1   1   44.15    8.10 
   2  -1   1  684.62  127.09 
   2  -1   1  757.48  126.85 
   2  -1   1  735.45  127.08 
  -3   1  -1  169.58   28.42 
   3  -1   1  150.10   28.36 
  -4   1  -1   41.75    7.24 
  -4   1  -1   34.58    7.12 
   4  -1   1   36.66    7.38 
  -5   1  -1   67.31   11.71 
  -5   1  -1   65.25   11.62 
   5  -1   1   54.13   11.67 
  -6   1  -1    1.87    1.59 
  -6   1  -1    3.77    1.01 
  -6   1  -1    3.89    2.03 
   6  -1   1    5.73    2.32 
   6  -1   1    4.92    2.13 
  -7   1  -1    5.97    1.33 
   7  -1   1   -0.37    2.01 
   7  -1   1    7.97    2.25 
   7  -1   1    6.59    2.97 
  -8   1  -1    9.06    1.54 
  -8   1  -1    5.40    2.30 
  -8   1  -1    4.59    1.85 
   8  -1   1    3.50    3.05 
   8  -1   1    3.15    1.94 
   8  -1   1    1.01    2.58 
  -9   1  -1   12.14    3.58 
  -9   1  -1   16.94    4.07 
  -9   1  -1   15.30    2.99 
   9  -1   1   13.39    5.15 
   9  -1   1   12.90    3.44 
   9  -1   1   15.81    4.81 
 -10   1  -1   25.90    5.14 
 -10   1  -1   31.15    5.97 
 -10   1  -1   28.73    6.52 
  10  -1   1   30.04    6.83 
  10  -1   1   26.47    7.19 
 -11   1  -1   40.96    8.74 
 -11   1  -1   46.32    8.10 
 -11   1  -1   47.19    9.73 
  11  -1   1   33.17   10.43 
 -12   1  -1    2.89    1.18 
 -12   1  -1    3.53    1.33 
 -12   1  -1    4.03    2.63 
 -12   1  -1    2.76    2.22 
  12  -1   1    1.62    3.29 
 -13   1  -1   42.64   11.13 
 -13   1  -1   57.95    9.41 
  13  -1   1   33.39   11.30 
 -14   1  -1    2.81    1.49 
 -14   1  -1    4.89    1.75 
  14  -1   1    6.44    2.80 
 -15   1  -1    5.76    1.94 
 -15   1  -1    6.53    1.85 
  15  -1   1    6.75    3.17 
 -16   1  -1    0.90    1.48 
 -16   1  -1    0.21    1.32 
 -16   1  -1    0.84    0.62 
  16  -1   1    1.54    2.99 
 -17   1  -1    8.01    2.33 
 -17   1  -1    9.25    2.52 
 -17   1  -1    9.03    1.74 
  17  -1   1    7.87    3.80 
 -18   1  -1   -1.34    1.50 
 -18   1  -1    0.62    0.58 
 -18   1  -1    0.66    1.12 
 -18   1  -1   -0.07    1.35 
  18  -1   1   -1.78    2.37 
 -19   1  -1    0.51    0.85 
 -19   1  -1    2.22    0.74 
 -19   1  -1    4.14    1.65 
 -20   1  -1   -0.91    1.30 
 -20   1  -1    0.14    0.49 
 -20   1  -1   -0.89    0.63 
 -21   1  -1    3.70    1.13 
 -22   1  -1   -0.89    0.50 
 -22   0   1   -0.54    0.67 
  21   0  -1   -1.13    0.88 
 -21   0   1    2.61    0.67 
 -21   0   1    0.42    0.79 
 -20   0   1   -0.26    0.84 
 -19   0   1    2.84    0.84 
 -19   0   1    3.06    1.11 
 -19   0   1    3.76    1.67 
  18   0  -1    2.60    3.58 
 -18   0   1    1.84    1.10 
 -18   0   1    4.50    1.66 
  17   0  -1   -0.13    2.73 
 -17   0   1    3.68    1.64 
 -17   0   1    2.98    1.68 
  16   0  -1    2.10    3.14 
 -16   0   1    0.47    1.33 
 -16   0   1    0.53    1.25 
  15   0  -1   -0.10    2.32 
 -15   0   1    0.44    1.25 
 -15   0   1    1.47    1.20 
  14   0  -1   -1.19    1.88 
 -14   0   1   -0.04    1.36 
 -14   0   1   -0.54    0.99 
  13   0  -1    1.29    4.22 
  13   0  -1    2.05    2.22 
 -13   0   1    1.39    0.98 
 -13   0   1    1.28    1.77 
 -13   0   1   -0.76    0.98 
 -13   0   1   -0.69    2.10 
  12   0  -1    6.13    2.60 
  12   0  -1    0.12    4.16 
 -12   0   1    3.26    2.66 
 -12   0   1    4.85    1.79 
 -12   0   1    5.39    1.59 
 -12   0   1    4.81    1.50 
  11   0  -1   -0.31    2.93 
 -11   0   1    3.63    2.25 
  10   0  -1   62.71   12.94 
 -10   0   1   58.61   11.33 
 -10   0   1   57.57   10.42 
   9   0  -1   21.79    5.83 
  -9   0   1   21.14    4.49 
  -9   0   1   20.86    4.81 
  -9   0   1   18.01    3.59 
   8   0  -1   -1.60    1.82 
   8   0  -1    0.90    2.18 
  -8   0   1   -0.04    0.52 
  -8   0   1   -1.31    1.16 
  -8   0   1    0.95    1.22 
   7   0  -1    0.60    2.34 
   7   0  -1   -0.82    1.64 
  -7   0   1    0.61    1.38 
  -7   0   1    0.92    1.18 
  -7   0   1    0.29    0.48 
  -7   0   1    2.33    1.26 
   6   0  -1   56.45    9.71 
   6   0  -1   38.59    8.61 
  -6   0   1   40.21    8.47 
  -6   0   1   43.96    8.30 
  -6   0   1   51.93    8.60 
  -6   0   1   46.36    8.55 
   5   0  -1    9.05    2.74 
   5   0  -1    9.76    3.29 
  -5   0   1   11.36    2.78 
  -5   0   1   12.65    2.79 
  -5   0   1   12.30    2.77 
   4   0  -1    0.69    1.21 
   4   0  -1   -2.52    1.62 
  -4   0   1   -0.55    0.85 
  -4   0   1    0.31    0.74 
  -4   0   1    0.55    1.17 
   3   0  -1   24.71    5.00 
   3   0  -1   28.65    5.54 
  -3   0   1   28.65    5.04 
  -3   0   1   25.77    5.06 
   2   0  -1   -0.05    0.97 
   2   0  -1   -0.25    0.55 
  -2   0   1    0.43    0.44 
  -2   0   1    0.74    0.55 
  -2   0   1   -0.19    0.72 
   1   0  -1  419.68   69.30 
  -1   0   1  408.32   69.29 
  -1   0   1  363.24   69.25 
  -1   0   1  396.62   69.16 
   0   0  -1  293.51   54.95 
   0   0  -1  341.98   54.91 
   0   0   1  309.21   54.96 
   0   0   1  312.29   54.87 
  -1   0  -1    3.32    0.75 
  -1   0  -1    2.10    0.66 
  -1   0  -1    1.72    0.67 
   1   0   1    2.83    0.70 
   1   0   1    3.72    0.68 
  -2   0  -1  135.17   24.44 
  -2   0  -1  152.49   24.39 
   2   0   1  137.60   24.42 
   2   0   1  130.29   24.27 
  -3   0  -1  243.84   47.27 
   3   0   1  269.71   47.17 
   3   0   1  303.98   47.42 
  -5   0  -1  596.47  106.13 
   5   0   1  601.23  105.92 
   5   0   1  623.75  106.26 
  -6   0  -1   12.89    2.90 
  -6   0  -1   11.21    2.96 
  -6   0  -1   12.60    2.95 
   6   0   1   11.33    2.55 
   6   0   1    9.77    3.34 
   6   0   1   14.23    3.48 
  -7   0  -1   46.36    9.30 
  -7   0  -1   50.25    9.25 
  -7   0  -1   53.06    9.10 
  -7   0  -1   49.61    8.72 
   7   0   1   52.77    9.90 
   7   0   1   69.50   10.72 
   7   0   1   43.42    8.90 
  -8   0  -1   69.55   10.91 
  -8   0  -1   59.88   10.15 
  -8   0  -1   48.90   10.43 
   8   0   1   71.87   12.14 
   8   0   1   62.32   11.52 
   8   0   1   47.44   10.40 
  -9   0  -1   57.89    9.70 
  -9   0  -1   54.99   10.40 
  -9   0  -1   50.27   10.04 
   9   0   1   55.61   11.48 
   9   0   1   49.94   10.01 
   9   0   1   55.08   11.06 
 -10   0  -1    5.67    1.45 
 -10   0  -1    5.60    2.40 
 -10   0  -1    5.36    2.16 
  10   0   1   10.49    4.17 
  10   0   1   11.57    3.59 
 -11   0  -1    0.59    0.83 
 -11   0  -1    1.73    1.87 
 -11   0  -1    0.37    1.63 
  11   0   1    0.44    3.47 
 -12   0  -1    3.54    1.07 
 -12   0  -1   -1.36    1.65 
 -12   0  -1    3.16    2.25 
 -12   0  -1    1.76    1.05 
  12   0   1    1.66    3.31 
 -13   0  -1    1.14    2.39 
 -13   0  -1   -0.02    1.24 
 -13   0  -1   -0.62    1.63 
 -13   0  -1    4.54    1.30 
  13   0   1    0.69    3.43 
 -14   0  -1   26.38    4.95 
  14   0   1   18.18    7.38 
 -15   0  -1   -0.58    1.16 
 -15   0  -1   -0.77    1.09 
  15   0   1    1.81    2.23 
 -16   0  -1   60.31   11.18 
 -16   0  -1   60.90   10.99 
 -17   0  -1    5.70    2.13 
 -17   0  -1    6.77    1.88 
  17   0   1    2.41    2.87 
 -18   0  -1    2.60    1.49 
 -18   0  -1    3.24    1.70 
  18   0   1    1.31    2.80 
 -19   0  -1   10.28    2.58 
 -19   0  -1    9.59    1.90 
 -20   0  -1   -0.22    0.45 
 -20   0  -1   -0.52    0.75 
 -20   0  -1   -0.80    0.84 
 -21   0  -1    0.75    0.89 
 -21   0  -1    1.90    0.59 
 -21   0  -1   -0.28    1.36 
 -22   0  -1    0.06    0.79 
  21  -1  -1    0.86    1.80 
 -21   1   1    0.41    0.48 
 -21   1   1   -0.06    0.54 
 -20   1   1    0.54    0.85 
 -20   1   1    0.05    0.50 
 -19   1   1    7.22    1.65 
 -18   1   1    0.10    0.74 
 -18   1   1   -2.32    1.29 
 -18   1   1    0.74    0.49 
  17  -1  -1   -0.64    2.51 
 -17   1   1    0.71    1.36 
 -17   1   1    0.33    0.54 
 -17   1   1    2.21    1.59 
  16  -1  -1    1.76    2.58 
 -16   1   1    1.48    0.62 
 -16   1   1    1.33    1.50 
 -16   1   1    0.80    1.37 
  15  -1  -1    5.23    3.25 
 -15   1   1   13.00    2.73 
 -15   1   1   10.31    2.65 
  14  -1  -1    2.81    2.89 
 -14   1   1    2.39    1.31 
 -14   1   1    0.88    1.19 
  13  -1  -1    2.92    2.26 
  13  -1  -1   -4.00    4.46 
 -13   1   1    0.30    1.08 
 -13   1   1    3.71    1.28 
  12  -1  -1   24.55    8.94 
  12  -1  -1   45.36    8.57 
 -12   1   1   46.46    9.42 
 -12   1   1   35.31    7.26 
 -12   1   1   43.73    7.24 
 -12   1   1   38.72    7.21 
  11  -1  -1    0.76    1.96 
  11  -1  -1    3.77    4.42 
 -11   1   1    8.50    1.71 
 -11   1   1    3.97    1.42 
 -11   1   1    4.24    2.87 
  10  -1  -1    5.18    3.49 
 -10   1   1    3.30    2.42 
   9  -1  -1    0.78    2.36 
  -9   1   1    0.67    1.75 
   8  -1  -1    3.01    2.43 
  -8   1   1    2.69    1.88 
  -8   1   1    4.12    1.66 
  -8   1   1    2.50    1.00 
   7  -1  -1   39.65    8.53 
   7  -1  -1   51.18    9.60 
  -7   1   1   46.38    8.45 
  -7   1   1   38.02    8.00 
  -7   1   1   44.17    7.73 
   6  -1  -1    6.58    2.57 
   6  -1  -1    1.86    1.82 
  -6   1   1    0.72    0.65 
  -6   1   1    4.35    1.49 
  -6   1   1    1.35    1.58 
  -6   1   1    1.18    1.42 
  -6   1   1   -0.25    0.83 
   5  -1  -1   -0.90    1.52 
   5  -1  -1   -1.47    1.88 
  -5   1   1    1.17    1.13 
  -5   1   1    0.45    0.72 
  -5   1   1   -1.23    0.94 
  -5   1   1   -0.41    1.34 
   4  -1  -1    2.98    2.33 
   4  -1  -1    1.47    1.42 
  -4   1   1    0.58    1.29 
  -4   1   1    0.79    0.82 
  -4   1   1    1.92    1.20 
   3  -1  -1   15.69    3.42 
   3  -1  -1   13.48    3.71 
  -3   1   1   21.66    3.37 
  -3   1   1   11.76    3.34 
  -3   1   1   18.83    3.54 
   2  -1  -1   45.59    8.46 
   2  -1  -1   54.68    8.77 
  -2   1   1   50.95    8.47 
  -2   1   1   43.25    8.58 
  -2   1   1   44.59    8.59 
   1  -1  -1   29.55    5.15 
   1  -1  -1   31.25    5.40 
   1  -1  -1   23.93    5.24 
  -1   1   1   26.44    5.26 
  -1   1   1   32.44    5.34 
  -1   1   1   29.82    5.16 
   0  -1  -1   79.33   13.71 
   0  -1  -1   73.62   13.80 
   0   1   1   76.41   13.74 
   0   1   1   83.41   13.83 
  -1  -1  -1   17.81    2.82 
  -1  -1  -1   14.55    2.78 
  -1  -1  -1   13.27    2.75 
   1   1   1   16.27    2.80 
  -2  -1  -1  346.40   59.27 
  -2  -1  -1  326.14   59.12 
  -2  -1  -1  317.15   59.11 
  -2  -1  -1  383.12   59.30 
   2   1   1  330.72   59.23 
  -3  -1  -1   49.35    8.39 
  -3  -1  -1   45.07    8.39 
  -3  -1  -1   51.56    8.73 
  -3  -1  -1   48.22    8.60 
  -4  -1  -1  180.56   28.43 
  -4  -1  -1  156.32   28.02 
  -4  -1  -1  144.68   28.16 
  -4  -1  -1  166.89   28.04 
   4   1   1  155.54   28.31 
  -5  -1  -1   10.02    2.42 
  -5  -1  -1    8.33    2.74 
   5   1   1   12.57    3.02 
  -6  -1  -1  167.97   27.22 
  -6  -1  -1  156.71   27.19 
  -6  -1  -1  148.74   27.25 
  -6  -1  -1  145.73   27.59 
   6   1   1  140.98   27.48 
  -7  -1  -1    9.11    2.37 
  -7  -1  -1    9.52    2.42 
   7   1   1   13.61    3.38 
  -8  -1  -1   10.97    2.38 
  -8  -1  -1    5.22    2.15 
  -8  -1  -1    7.27    2.16 
   8   1   1    6.68    2.91 
   8   1   1    7.85    2.99 
  -9  -1  -1    0.66    1.56 
  -9  -1  -1   -0.30    0.41 
  -9  -1  -1   -0.10    1.00 
   9   1   1    1.81    2.79 
   9   1   1    0.22    2.05 
   9   1   1    0.45    1.22 
 -10  -1  -1   -0.36    0.51 
 -10  -1  -1   -0.37    1.13 
 -10  -1  -1   -1.11    1.44 
  10   1   1   -0.01    2.71 
  10   1   1    0.28    1.40 
  10   1   1    3.25    2.44 
 -11  -1  -1    3.21    1.83 
 -11  -1  -1    1.35    0.81 
 -11  -1  -1   -1.15    1.66 
  11   1   1   -1.05    2.84 
 -12  -1  -1    5.90    1.34 
 -12  -1  -1    3.70    2.38 
 -12  -1  -1    1.09    2.13 
  12   1   1    0.31    3.55 
 -13  -1  -1    4.00    2.30 
 -13  -1  -1   -0.94    0.86 
 -13  -1  -1   -0.26    0.67 
 -13  -1  -1    1.81    1.89 
  13   1   1    1.25    3.45 
 -14  -1  -1    1.21    1.03 
 -14  -1  -1    2.68    1.20 
 -14  -1  -1    2.43    2.46 
  14   1   1   -1.12    3.60 
 -15  -1  -1    4.23    1.48 
 -16  -1  -1    0.55    1.17 
 -16  -1  -1    1.40    1.30 
  16   1   1   -1.78    2.60 
 -17  -1  -1    5.38    1.86 
 -17  -1  -1    4.55    1.66 
  17   1   1    3.15    3.52 
 -18  -1  -1   -0.87    1.19 
 -18  -1  -1    1.33    1.39 
  18   1   1    0.40    3.18 
 -19  -1  -1    1.09    1.39 
 -19  -1  -1    1.30    0.90 
 -20  -1  -1    4.03    1.65 
 -20  -1  -1    1.91    0.93 
 -21  -1  -1    2.31    0.64 
 -21  -1  -1    2.13    0.85 
 -21  -1  -1    0.31    1.49 
 -22  -1  -1   -1.68    0.75 
 -23  -1  -1   -0.24    0.69 
 -21   2   1   -0.01    0.73 
  20  -2  -1    3.10    1.46 
 -20   2   1    4.31    0.98 
 -20   2   1    3.58    1.11 
 -18   2   1    2.15    0.72 
 -18   2   1    0.22    0.95 
 -18   2   1    0.57    1.44 
  17  -2  -1   -2.60    2.31 
 -17   2   1   -0.76    0.43 
 -17   2   1    0.19    1.40 
 -17   2   1   -0.10    0.70 
 -17   2   1    1.17    1.58 
  16  -2  -1   -0.90    2.33 
 -16   2   1   -0.37    1.22 
 -16   2   1    1.09    1.70 
 -16   2   1    0.67    0.57 
  15  -2  -1    5.48    3.75 
 -15   2   1    6.83    2.10 
 -15   2   1    7.44    2.24 
 -15   2   1    7.98    1.53 
  14  -2  -1    1.51    2.51 
 -14   2   1    2.97    1.39 
 -14   2   1    1.80    1.28 
 -14   2   1    2.00    0.64 
  13  -2  -1    3.65    2.87 
 -13   2   1    1.85    1.22 
 -13   2   1    1.85    0.64 
 -13   2   1    1.67    1.30 
  12  -2  -1   -1.61    1.88 
  12  -2  -1    2.16    4.47 
 -12   2   1   -0.58    1.04 
 -12   2   1   -0.01    2.28 
 -12   2   1    0.06    1.12 
 -12   2   1    2.76    1.47 
  11  -2  -1    1.11    3.76 
  11  -2  -1   -0.83    2.06 
 -11   2   1    0.36    2.50 
 -11   2   1    1.00    0.86 
 -11   2   1    0.17    1.03 
 -11   2   1    1.08    1.16 
  10  -2  -1    5.88    3.90 
  10  -2  -1    5.00    2.70 
 -10   2   1    4.74    2.79 
 -10   2   1    4.63    1.54 
   9  -2  -1    2.69    2.75 
  -9   2   1    1.85    2.01 
  -9   2   1    0.52    0.93 
   8  -2  -1   26.14    6.68 
  -8   2   1   24.76    6.03 
   7  -2  -1   76.73   14.05 
   7  -2  -1   64.46   12.89 
  -7   2   1   69.18   13.08 
   6  -2  -1   18.00    5.13 
   6  -2  -1   21.75    4.66 
  -6   2   1   18.10    3.55 
  -6   2   1   19.27    4.56 
   5  -2  -1   -0.40    1.87 
   5  -2  -1    3.36    2.51 
  -5   2   1    3.40    1.49 
  -5   2   1    4.45    1.80 
  -5   2   1    2.62    1.09 
  -5   2   1    3.18    1.01 
  -5   2   1    4.89    2.03 
   4  -2  -1   -0.65    1.32 
   4  -2  -1   -0.26    2.01 
  -4   2   1    1.72    1.55 
  -4   2   1    0.31    0.85 
  -4   2   1    1.50    1.53 
   3  -2  -1   14.57    4.69 
   3  -2  -1   22.91    4.63 
  -3   2   1   24.91    4.19 
   2  -2  -1   12.16    2.53 
   2  -2  -1    9.48    2.60 
  -2   2   1    9.93    2.14 
  -2   2   1    9.97    2.49 
   1  -2  -1   23.74    3.49 
   1  -2  -1   11.37    3.41 
   1  -2  -1   16.24    3.52 
  -1   2   1   20.52    3.13 
  -1   2   1   11.51    3.37 
   0  -2  -1   86.43   15.42 
   0  -2  -1   85.18   15.52 
   0  -2  -1   89.70   15.52 
   0   2   1   91.30   15.55 
   0   2   1   84.40   15.38 
  -1  -2  -1   29.28    4.81 
  -1  -2  -1   24.23    4.75 
  -1  -2  -1   26.75    4.77 
   1   2   1   22.07    4.71 
   1   2   1   27.08    4.79 
  -2  -2  -1  139.55   25.66 
  -2  -2  -1  150.61   25.68 
  -2  -2  -1  150.79   25.83 
  -3  -2  -1   19.15    4.09 
  -3  -2  -1   21.24    4.20 
  -3  -2  -1   22.67    4.24 
  -4  -2  -1   11.50    2.86 
  -4  -2  -1   13.40    2.94 
  -4  -2  -1   12.78    2.90 
  -5  -2  -1   92.00   17.26 
  -5  -2  -1   99.66   17.25 
  -6  -2  -1   18.93    2.86 
  -6  -2  -1   12.23    2.83 
  -6  -2  -1    6.14    1.52 
  -7  -2  -1   -0.17    0.58 
  -7  -2  -1    3.40    1.18 
  -7  -2  -1    1.09    1.29 
  -7  -2  -1    0.53    0.71 
  -7  -2  -1    1.47    2.02 
   7   2   1    2.38    1.98 
  -8  -2  -1    3.12    1.75 
  -8  -2  -1    5.09    1.80 
  -8  -2  -1    3.17    1.32 
   8   2   1    5.59    2.45 
  -9  -2  -1  164.90   30.62 
  -9  -2  -1  158.88   30.58 
  -9  -2  -1  190.26   30.73 
  -9  -2  -1  184.12   30.75 
   9   2   1  178.52   31.43 
   9   2   1  159.97   31.14 
 -10  -2  -1   40.19    8.54 
 -10  -2  -1   49.52    8.44 
  10   2   1   41.28    9.71 
  10   2   1   38.38    9.22 
 -11  -2  -1   15.33    3.60 
 -11  -2  -1   13.82    2.69 
 -11  -2  -1   16.06    3.79 
  11   2   1   16.92    5.65 
  11   2   1   17.72    5.52
[truncated: 5,265,676 more chars]
